# Supplementary material for: Self-reported attitudes, knowledge and skills of using evidence-based medicine in daily health care practice: A national survey among students of medicine and health sciences in Hungary
Source: PLoS One. 2019 Dec 27;14(12):e0225641. doi: 10.1371/journal.pone.0225641 (PMC6934312; doi:10.1371/journal.pone.0225641)
Supplement: S2 Questionnaire — (XLS) [file pone.0225641.s002.xls]

## Sheet: ETK_hallgatoi adatok_kerdessel
Sorszám	Szerkesztési link	1. Hallgató neme:	2. Melyik egyetem hallgatója vagy?	2. Melyik egyetem hallgatója vagy? > Egyéb	3. Milyen szakon tanulsz?	4. Melyik szak hallgatója vagy?	4. Melyik szak hallgatója vagy? > Egyéb	5. Nappali, vagy levelezős munkarend hallgatója vagy?	6. Hányadik évfolyam hallgatója vagy?	7. Dolgoztál már korábban az egészségügyben (legalább 1 évet)?	8. Tanulmányaid mellett részt veszel kutatócsoport munkájában (pl. TDK munka keretében)?	9. A közeli hozzátartozóid között (szülők, testvérek, házastárs) van olyan, aki az egészségügyben dolgozik?	10. Ha igen, hatással volt ez a pályaválasztásodra?	11. Milyen gyakran olvasol szakmai folyóiratokat?	12. Rendelkezel saját számítógéppel?	13. Van internet hozzáférésed?	14. Van ingyenes internet hozzáférésed?	15. A következő kereső felületek közül melyiket használtad már orvosi/ egészségügyi információ szerzésére?	16. A következő kereső felületek közül melyiket használtad már orvosi/ egészségügyi információ szerzésére? > Google	16. A következő kereső felületek közül melyiket használtad már orvosi/ egészségügyi információ szerzésére? > Google Scholar	16. A következő kereső felületek közül melyiket használtad már orvosi/ egészségügyi információ szerzésére? > Wikipedia	16. A következő kereső felületek közül melyiket használtad már orvosi/ egészségügyi információ szerzésére? > Pubmed/Medline	16. A következő kereső felületek közül melyiket használtad már orvosi/ egészségügyi információ szerzésére? > Medscape	16. A következő kereső felületek közül melyiket használtad már orvosi/ egészségügyi információ szerzésére? > Cochrane Library	17. Mit tekintesz az egészségügyi információszerzés fő forrásának?	18. Vettél már részt szakmai képzésen (kurzus, tanfolyam), ahol a bizonyítékokon alapuló orvoslással (BAO, EBM) kapcsolatos ismereteket szereztél?	19. Ha igen, hasznosnak tartottad a képzést a további tanulmányaid illetve a későbbi munkád szempontjából?	20. Hasznosnak tartanál egy ilyen képzést a további tanulmányaid illetve a későbbi munkád szempontjából?	21. Ha igen, melyik évfolyamon lenne szerinted hasznos az EBM oktatása?	22. Szerepet játszik-e az adott egészségügyi információ nyelve abban, hogy elolvasod-e?	23. Milyennek ítéled a készségeidet a következő területeken?SZAKMAI IRODALOM KERESÉSE	24. Milyennek ítéled a készségeidet a következő területeken?KERESÉS ONLINE ADATBÁZISOKBAN	25. Milyennek ítéled a készségeidet a következő területeken?KLINIKAI KUTATÁSOKAT LEíRÓ KÖZLEMÉNYEK KRITIKUS ÉRTÉKELÉSE	26. Milyennek ítéled a készségeidet a következő területeken?OLYAN FONTOS KLINIKAI TERÜLETEK AZONOSíTÁSA, AHOL MÉG NEM ÁLL RENDELKEZÉSRE ELÉG SZAKIRODALOM	27. Milyennek ítéled a készségeidet a következő területeken?A RENDELKEZÉSRE ÁLLÓ SZAKIRODALOM KRITIKUS MEGíTÉLÉSE	28. Milyennek ítéled a készségeidet a következő területeken?BETEGEK SZEMPONTJÁBÓL FONTOS KÉRDÉSEK AZONOSíTÁSA	29. Önbevalláson alapuló fogalomismeret > Bizonyítékokon alapuló orvoslás (evidence-based medicine)	29. Önbevalláson alapuló fogalomismeret > Eredeti kezelési szándék szerinti elemzés (intention-to-treat analysis)	29. Önbevalláson alapuló fogalomismeret > Esetszám (sample size)	29. Önbevalláson alapuló fogalomismeret > Esettanulmány (case study	30. Önbevalláson alapuló fogalomismeret > Kohorsz vizsgálat (cohort study	30. Önbevalláson alapuló fogalomismeret > Konfidencia intervallum	30. Önbevalláson alapuló fogalomismeret > Kontrollált klinikai vizsgálat	31. Önbevalláson alapuló fogalomismeret > Lemorzsolódás (lost to follow-up)	31. Önbevalláson alapuló fogalomismeret > Meta-analízis	31. Önbevalláson alapuló fogalomismeret > NNT (number needed to treat)	32. Önbevalláson alapuló fogalomismeret > Randomizálás (randomization)	32. Önbevalláson alapuló fogalomismeret > Szakmai irányelv (guideline)	32. Önbevalláson alapuló fogalomismeret > Szisztematikus irodalmi áttekintés (systematic review)
1	https://online-kerdoiv.com/index/view/hash/f505d52a49dd686dada6511e6d93f5bb/r/AZCMEsSom1LLjHY2WuXk3xdyllmqvMrLzSSlaSSXkPtLJluziTbuwYxyHu9fO5I3jMqhKk1KHUZfpSHs8XUs93SDK0kuMqt8Jc8n6ZajNZNVSPi5VxXkaivPPluSSp98OYBqJ4tupLSSePPxiPPluSSHtMRiL3eIja4CIkd3DCXpXQ3fnPPluSSmtPPluSSw5PPluSSJx5KQ20%3D	Férfi	Debreceni Egyetem		Alapképzési (Bsc)	Mentőtiszt (Bsc)		Levelezős	Harmadik	Igen	Nem	Nem		Hetente	Igen	Igen	Igen	Google							Nyomtatott szakkönyvek	Igen	Igen	Igen	az 1.-2. évfolyamon	Igen, csak magyarul szeretek olvasni	Valamennyire értek hozzá (2)	Valamennyire értek hozzá (2)	Valamennyire értek hozzá (2)	Valamennyire értek hozzá (2)	Valamennyire értek hozzá (2)	Valamennyire értek hozzá (2)	Értem a jelentését, és másoknak is el tudnám magyarázni	Értem a jelentését, és másoknak is el tudnám magyarázni	Értem a jelentését, és másoknak is el tudnám magyarázni	Értem a jelentését, és másoknak is el tudnám magyarázni	Értem a jelentését, és másoknak is el tudnám magyarázni	Értem a jelentését, és másoknak is el tudnám magyarázni	Értem a jelentését, és másoknak is el tudnám magyarázni	Értem a jelentését, és másoknak is el tudnám magyarázni	Értem a jelentését, és másoknak is el tudnám magyarázni	Értem a jelentését, és másoknak is el tudnám magyarázni	Értem a jelentését, és másoknak is el tudnám magyarázni	Értem a jelentését, és másoknak is el tudnám magyarázni	Értem a jelentését, és másoknak is el tudnám magyarázni
2	https://online-kerdoiv.com/index/view/hash/f505d52a49dd686dada6511e6d93f5bb/r/FPPluSSyLj1zV7t7RjyaItbHVwZYwyhSSlaSShUAn9uDq2B2RPPluSSgheWTH5A8tgvDd4AESGNPORFcrzGPPluSSkYrFNtt5P0Ka03g0JEM5l9RygrXSMVxEoivmYM6ai0KbP1kFKFBcFq2PgI4SSePPiI6ZKvrkcfSSlaSSJviBm3E8VycnBqwP13Q7V9qihwtSUwXw%3D	Nő	Debreceni Egyetem		Alapképzési (Bsc)	Ápoló (Bsc)		Nappali	Negyedik	Igen	Nem	Igen	Igen	Havonta vagy ritkábban	Igen	Igen	Nem	Google							Nyomtatott szakkönyvek	Igen	Nem	Nem		Nem, az angol és magyar nyelvű forrásokat egyaránt elolvasom	Átlagos (3)	Gyenge (1)	Gyenge (1)	Gyenge (1)	Átlagos (3)	Átlagosnál jobb (4)	Értem a jelentését, és másoknak is el tudnám magyarázni	Nem ismerem a jelentését, de szerintem nem is hasznos számomra	Többé-kevésbé értem a jelentését	Értem a jelentését, és másoknak is el tudnám magyarázni	Többé-kevésbé értem a jelentését	Nem ismerem a jelentését, de szerintem nem is hasznos számomra	Többé-kevésbé értem a jelentését	Értem a jelentését, és másoknak is el tudnám magyarázni	Többé-kevésbé értem a jelentését	Nincs véleményem ezzel kapcsolatosan	Értem a jelentését, és másoknak is el tudnám magyarázni	Értem a jelentését, és másoknak is el tudnám magyarázni	Többé-kevésbé értem a jelentését
3	https://online-kerdoiv.com/index/view/hash/f505d52a49dd686dada6511e6d93f5bb/r/UE37b0C0sV0coMp2pjsJJvAmEezZxIBCLXbTG6Njx4gCw90KGMfJkKIJg2llEpRedGqUkOcPQiyhrnPCzQSmydLJ06xQpyP1A2WVOGluDI04bqGcXlom4hprk5VLvuJSSSePPK8wz1SSlaSScufSIkDdZDJMNv2JWyb0JdfLVkU0f7i9B8K7A%3D	Nő	Debreceni Egyetem		Alapképzési (Bsc)	Mentőtiszt (Bsc)		Nappali	Első	Nem	Nem	Nem		Hetente	Igen	Igen	Igen	Google Scholar							Egészségügyi szakemberek véleményének megismerése	Igen	Igen	Igen	az 1.-2. évfolyamon	Nem, az angol és magyar nyelvű forrásokat egyaránt elolvasom	Átlagos (3)	Átlagosnál jobb (4)	Valamennyire értek hozzá (2)	Gyenge (1)	Valamennyire értek hozzá (2)	Átlagosnál jobb (4)	Többé-kevésbé értem a jelentését	Többé-kevésbé értem a jelentését	Értem a jelentését, és másoknak is el tudnám magyarázni	Értem a jelentését, és másoknak is el tudnám magyarázni	Nem ismerem a jelentését, de szeretném megismerni	Nem ismerem a jelentését, de szeretném megismerni	Többé-kevésbé értem a jelentését	Értem a jelentését, és másoknak is el tudnám magyarázni	Nem ismerem a jelentését, de szeretném megismerni	Nem ismerem a jelentését, de szeretném megismerni	Többé-kevésbé értem a jelentését	Többé-kevésbé értem a jelentését	Értem a jelentését, és másoknak is el tudnám magyarázni
4	https://online-kerdoiv.com/index/view/hash/f505d52a49dd686dada6511e6d93f5bb/r/Vc2HXZZqSSlaSSPPluSSbxVpvU9KGcQbDzCRJVSSlaSSfkFh8eQDTPPluSSx2CEe1treKuW9RHkXsSBWDXcKDwDYC9KCejXQrSSlaSSPPluSSNPDnSSlaSS4GlbFhIQFYzSCmA4f8yo765kRQ9czpprYTIltap10PPluSSPqSSePP7cmtcSSlaSSDxlqqPPluSSVkueoMLnquW3WluNY1YEmV6hJSMJc9c%3D	Férfi	Debreceni Egyetem		Alapképzési (Bsc)	Mentőtiszt (Bsc)		Nappali	Első	Nem	Nem	Igen	Igen	Naponta	Igen	Igen	Nem	Medscape							Elektonikus média	Nem		Nem		Igen, csak angolul szeretek olvasni	Átlagos (3)	Haladó szintű (5)	Valamennyire értek hozzá (2)	Gyenge (1)	Átlagos (3)	Valamennyire értek hozzá (2)	Értem a jelentését, és másoknak is el tudnám magyarázni	Értem a jelentését, és másoknak is el tudnám magyarázni	Értem a jelentését, és másoknak is el tudnám magyarázni	Értem a jelentését, és másoknak is el tudnám magyarázni	Nem ismerem a jelentését, de szeretném megismerni	Nem ismerem a jelentését, de szeretném megismerni	Nem ismerem a jelentését, de szeretném megismerni	Értem a jelentését, és másoknak is el tudnám magyarázni	Értem a jelentését, és másoknak is el tudnám magyarázni	Értem a jelentését, és másoknak is el tudnám magyarázni	Nem ismerem a jelentését, de szeretném megismerni	Értem a jelentését, és másoknak is el tudnám magyarázni	Többé-kevésbé értem a jelentését
5	https://online-kerdoiv.com/index/view/hash/f505d52a49dd686dada6511e6d93f5bb/r/9vOvnDJMdeVArw7SSlaSSkcDDVg3fugaESSlaSSxVn9EHMw33ZjSRBda09ntKFFr5QWetMBn1L2c1K9OB0Kwj04ypvuDYUSrWVYavmoZr2XMkT1xPPluSS87FgQbPeDSSlaSSkw25VnHPqdgoph4SSePPmF5WoXQBLiEEgHizOvL9SELbPonDJUpiWNrUSfgUtqk%3D	Nő	Debreceni Egyetem		Alapképzési (Bsc)	Mentőtiszt (Bsc)		Nappali	Második	Nem	Nem	Nem		Havonta vagy ritkábban	Igen	Igen	Nem	Google							Elektronikus folyóiratok	Nem		Igen	a 3.-4. évfolyamon	Nem, az angol és magyar nyelvű forrásokat egyaránt elolvasom	Gyenge (1)	Gyenge (1)	Gyenge (1)	Valamennyire értek hozzá (2)	Átlagos (3)	Átlagos (3)	Nem ismerem a jelentését, de szeretném megismerni	Nem ismerem a jelentését, de szeretném megismerni	Értem a jelentését, és másoknak is el tudnám magyarázni	Értem a jelentését, és másoknak is el tudnám magyarázni	Értem a jelentését, és másoknak is el tudnám magyarázni	Nem ismerem a jelentését, de szeretném megismerni	Többé-kevésbé értem a jelentését	Értem a jelentését, és másoknak is el tudnám magyarázni	Nem ismerem a jelentését, de szeretném megismerni	Nem ismerem a jelentését, de szeretném megismerni	Többé-kevésbé értem a jelentését	Többé-kevésbé értem a jelentését	Többé-kevésbé értem a jelentését
6	https://online-kerdoiv.com/index/view/hash/f505d52a49dd686dada6511e6d93f5bb/r/M1Amr30rBHpcJ32CSSlaSSNkurkU7KT0xsjE9Yn1RM9jChfkcqhrm2HIXBO7OA1XSoE0zAyWXLDnZGBbeaTatALhrT49IlO4YTQSSlaSSGbK3o52U5EqZg5kGDONBk5Jqc6amJUaunSSePPuwu8qZodgbuIGaQ8tldAFqQIkV7SiUAghu68sLkUIB8%3D	Nő	Debreceni Egyetem		Alapképzési (Bsc)	Egézségügyi ügyvitel szervező (Bsc)		Nappali	Második	Nem	Nem	Igen	Nem	Hetente	Igen	Igen	Igen	Google							Egészségügyi szakemberek véleményének megismerése	Nem		Igen	az 1.-2. évfolyamon	Igen, csak magyarul szeretek olvasni	Átlagosnál jobb (4)	Haladó szintű (5)	Átlagos (3)	Átlagos (3)	Átlagos (3)	Átlagos (3)	Többé-kevésbé értem a jelentését	Nem ismerem a jelentését, de szeretném megismerni	Többé-kevésbé értem a jelentését	Többé-kevésbé értem a jelentését	Értem a jelentését, és másoknak is el tudnám magyarázni	Többé-kevésbé értem a jelentését	Értem a jelentését, és másoknak is el tudnám magyarázni	Többé-kevésbé értem a jelentését	Nem ismerem a jelentését, de szeretném megismerni	Nem ismerem a jelentését, de szeretném megismerni	Többé-kevésbé értem a jelentését	Értem a jelentését, és másoknak is el tudnám magyarázni	Értem a jelentését, és másoknak is el tudnám magyarázni
7	https://online-kerdoiv.com/index/view/hash/f505d52a49dd686dada6511e6d93f5bb/r/C2e7k5AuuPPluSSvFa0uNXgNRKqPuGzGSGTkquuB0NInN6cuZJb2SSlaSSSwUHh6iM4K9mVSSlaSSvRg4GyC4W0xqnjORdx9cn8XrsFFbbX2IrUFBbRCZPA3FPPluSSulMZ7w9HCfeiOuMTVjIw6SSePPQPPluSSe1mQ5rvrxIurXEPTaPPluSSa5rsO955Ff7Og4TsjG7FNqs%3D	Nő	Debreceni Egyetem		Alapképzési (Bsc)	Ápoló (Bsc)		Levelezős	Harmadik	Igen	Nem	Igen	Nem	Havonta vagy ritkábban	Igen	Igen	Igen	Wikipedia							Egészségügyi szakemberek véleményének megismerése	Igen	Igen	Igen	a 3.-4. évfolyamon	Nem, sőt, olvastam már olyan forrást is, ami egyéb (nem angol vagy magyar) nyelven íródott	Átlagos (3)	Átlagos (3)	Átlagos (3)	Átlagos (3)	Átlagosnál jobb (4)	Átlagosnál jobb (4)	Értem a jelentését, és másoknak is el tudnám magyarázni	Értem a jelentését, és másoknak is el tudnám magyarázni	Értem a jelentését, és másoknak is el tudnám magyarázni	Értem a jelentését, és másoknak is el tudnám magyarázni	Többé-kevésbé értem a jelentését	Többé-kevésbé értem a jelentését	Értem a jelentését, és másoknak is el tudnám magyarázni	Értem a jelentését, és másoknak is el tudnám magyarázni	Nem ismerem a jelentését, de szeretném megismerni	Nem ismerem a jelentését, de szeretném megismerni	Többé-kevésbé értem a jelentését	Értem a jelentését, és másoknak is el tudnám magyarázni	Többé-kevésbé értem a jelentését
8	https://online-kerdoiv.com/index/view/hash/f505d52a49dd686dada6511e6d93f5bb/r/km2cHl12IugSSlaSS1tmafqkpousM5HJcviBOGqKTIv52PPPluSSG105WTftE1vPPluSSs5xAOwFIwNkdFhjVr8SDFblJh6OSSlaSStgiHfxaj3GPPluSSbjnq3nzChGuCDBT4wdQFREK4OOSmnucvesoSSePPcXZ6PPluSS9dCSSlaSSHHV51sQTPPluSSFiyBQdCHQmv8MYtzHeQdhCjb0%3D	Férfi	Debreceni Egyetem		Alapképzési (Bsc)	Mentőtiszt (Bsc)		Levelezős	Harmadik	Igen	Nem	Igen	Nem	Naponta	Igen	Igen	Igen	Wikipedia							Szakmai irányelvek	Igen	Igen	Igen	a 3.-4. évfolyamon	Igen, csak magyarul szeretek olvasni	Átlagosnál jobb (4)	Átlagosnál jobb (4)	Átlagosnál jobb (4)	Átlagos (3)	Átlagosnál jobb (4)	Átlagosnál jobb (4)	Értem a jelentését, és másoknak is el tudnám magyarázni	Értem a jelentését, és másoknak is el tudnám magyarázni	Értem a jelentését, és másoknak is el tudnám magyarázni	Értem a jelentését, és másoknak is el tudnám magyarázni	Értem a jelentését, és másoknak is el tudnám magyarázni	Többé-kevésbé értem a jelentését	Többé-kevésbé értem a jelentését	Értem a jelentését, és másoknak is el tudnám magyarázni	Nem ismerem a jelentését, de szeretném megismerni	Nem ismerem a jelentését, de szeretném megismerni	Értem a jelentését, és másoknak is el tudnám magyarázni	Értem a jelentését, és másoknak is el tudnám magyarázni	Értem a jelentését, és másoknak is el tudnám magyarázni
9	https://online-kerdoiv.com/index/view/hash/f505d52a49dd686dada6511e6d93f5bb/r/E0K3MJcVsmeF0qdqXZCDUzpWm2Elg7Ro0qWkpPiGh77bTV88SEmLewL1bZdTJqtxqwhbAeXpkv8aqRz19V2EB6MEioxgwjAX0KiBlpf4fzSMZXtdPPluSSsjyqtU8Qv6FC6wPSSePPXVQa0jwKtF3HbqGcQEnkR5TzYmUcVEf9BWHGW0PPluSS3qGk%3D	Nő	Debreceni Egyetem		Alapképzési (Bsc)	Ápoló (Bsc)		Levelezős	Második	Igen	Nem	Nem		Hetente	Igen	Igen	Igen	Google							Nyomtatott szakkönyvek	Nem		Igen	a 3.-4. évfolyamon	Igen, csak magyarul szeretek olvasni	Gyenge (1)	Gyenge (1)	Gyenge (1)	Gyenge (1)	Gyenge (1)	Átlagos (3)	Nem ismerem a jelentését, de szeretném megismerni	Nem ismerem a jelentését, de szeretném megismerni	Többé-kevésbé értem a jelentését	Többé-kevésbé értem a jelentését	Nem ismerem a jelentését, de szeretném megismerni	Nem ismerem a jelentését, de szeretném megismerni	Többé-kevésbé értem a jelentését	Többé-kevésbé értem a jelentését	Nem ismerem a jelentését, de szeretném megismerni	Nem ismerem a jelentését, de szeretném megismerni	Többé-kevésbé értem a jelentését	Többé-kevésbé értem a jelentését	Nem ismerem a jelentését, de szeretném megismerni
10	https://online-kerdoiv.com/index/view/hash/f505d52a49dd686dada6511e6d93f5bb/r/FKmZ1Pc2Rh9gcgb1LGXY7YWRalYHU1Yxs9TH4CNhji2A1YJLdzAXhFSQGYPPluSS8DtMjSfs0cPPqPi26fqojp3eHxSpg183PPluSS6vn3FMC3sMV97l9XOYgtmiPZNhriR70FQteSSlaSSSSePPw7tvW1NMylpXVC859vjBRNPaQw8wRFSLSSlaSSC369ckSSlaSSKbc%3D	Nő	Debreceni Egyetem		Alapképzési (Bsc)	Ápoló (Bsc)		Nappali	Negyedik	Nem	Nem	Nem		Havonta vagy ritkábban	Igen	Igen	Nem	Google							Nyomtatott szakkönyvek	Nem		Igen	a 3.-4. évfolyamon	Igen, csak magyarul szeretek olvasni	Átlagos (3)	Átlagos (3)	Gyenge (1)	Átlagos (3)	Valamennyire értek hozzá (2)	Átlagosnál jobb (4)	Többé-kevésbé értem a jelentését	Többé-kevésbé értem a jelentését	Értem a jelentését, és másoknak is el tudnám magyarázni	Értem a jelentését, és másoknak is el tudnám magyarázni	Értem a jelentését, és másoknak is el tudnám magyarázni	Többé-kevésbé értem a jelentését	Értem a jelentését, és másoknak is el tudnám magyarázni	Nem ismerem a jelentését, de szeretném megismerni	Többé-kevésbé értem a jelentését	Többé-kevésbé értem a jelentését	Nem ismerem a jelentését, de szeretném megismerni	Értem a jelentését, és másoknak is el tudnám magyarázni	Értem a jelentését, és másoknak is el tudnám magyarázni
11	https://online-kerdoiv.com/index/view/hash/f505d52a49dd686dada6511e6d93f5bb/r/Oi7UB6SSlaSSX2MFKoAGftuAWPPluSSdglxnQsMZWjZwJD7JYc3bGriP8mTqNfxhyKaRrPmCeBI5lUBTo8eTuiekFvbL6o31F91zxwM6LQo2qIBZ3Fr2Q58f4aXkbl7K1tY4oMcurdSSePPhSsnasHxm2H8FpOyoTXSSlaSSoPPluSS5mH9HwjwwSId0vAl4rsqk%3D	Nő	Debreceni Egyetem		Alapképzési (Bsc)	Egézségügyi ügyvitel szervező (Bsc)		Nappali	Első	Nem	Nem	Igen	Nem	Soha	Igen	Igen	Nem	Google							Oktatási jegyzetek	Igen	Igen	Igen	a 3.-4. évfolyamon	Igen, csak magyarul szeretek olvasni	Átlagos (3)	Gyenge (1)	Valamennyire értek hozzá (2)	Valamennyire értek hozzá (2)	Valamennyire értek hozzá (2)	Valamennyire értek hozzá (2)	Többé-kevésbé értem a jelentését	Többé-kevésbé értem a jelentését	Nincs véleményem ezzel kapcsolatosan	Nincs véleményem ezzel kapcsolatosan	Nincs véleményem ezzel kapcsolatos	Nincs véleményem ezzel kapcsolatos	Nincs véleményem ezzel kapcsolatos	Értem a jelentését, és másoknak is el tudnám magyarázni	Többé-kevésbé értem a jelentését	Nincs véleményem ezzel kapcsolatosan	Többé-kevésbé értem a jelentését	Többé-kevésbé értem a jelentését	Többé-kevésbé értem a jelentését
12	https://online-kerdoiv.com/index/view/hash/f505d52a49dd686dada6511e6d93f5bb/r/wjQqHW7jmYxbw8RyZkEo80HpgJnGzcSy05fsZdwsSSlaSSbWJHKPPluSSTgYeLLY8D5HG2ggasVQTuApot1K6TlnwPPluSSJLl0BcnbRSSlaSSQVMPPluSS860cTwiZhmxDWzpQB7PjcAkeSzItPPluSSFKh8QSSePPzaoCISSlaSSqjJZlSKEjqif2b8PY6SSlaSST2YZbdSSlaSSY9kmfGcnqLo%3D	Nő	Debreceni Egyetem		Alapképzési (Bsc)	Mentőtiszt (Bsc)		Nappali	Harmadik	Nem	Nem	Igen	Nem	Hetente	Igen	Igen	Igen	Pubmed/Medline							Nyomtatott szakkönyvek	Nem		Igen	a 3.-4. évfolyamon	Nem, sőt, olvastam már olyan forrást is, ami egyéb (nem angol vagy magyar) nyelven íródott	Haladó szintű (5)	Átlagosnál jobb (4)	Átlagosnál jobb (4)	Átlagos (3)	Átlagosnál jobb (4)	Haladó szintű (5)	Értem a jelentését, és másoknak is el tudnám magyarázni	Többé-kevésbé értem a jelentését	Értem a jelentését, és másoknak is el tudnám magyarázni	Értem a jelentését, és másoknak is el tudnám magyarázni	Értem a jelentését, és másoknak is el tudnám magyarázni	Többé-kevésbé értem a jelentését	Értem a jelentését, és másoknak is el tudnám magyarázni	Értem a jelentését, és másoknak is el tudnám magyarázni	Többé-kevésbé értem a jelentését	Többé-kevésbé értem a jelentését	Értem a jelentését, és másoknak is el tudnám magyarázni	Értem a jelentését, és másoknak is el tudnám magyarázni	Értem a jelentését, és másoknak is el tudnám magyarázni
13	https://online-kerdoiv.com/index/view/hash/f505d52a49dd686dada6511e6d93f5bb/r/O3H3TNyQeXVCCdNp0oQxQTseeE61ulNYMEsMyPPluSSSNCXPCUDmQA1d9v0yUDAUGkZM4c9fiZhLxMGUhrGPjrlgm6OcMPr84FceqFdm3ko7zF3yIXBz3SA43WFFpEqypfXoUSSePPAxwhrNDkA48wE4xPu34PLycFxPPluSST23HDVDaJP7IyDYhk%3D	Nő	Debreceni Egyetem		Alapképzési (Bsc)	Egézségügyi ügyvitel szervező (Bsc)		Nappali	Második	Nem	Nem	Nem		Havonta vagy ritkábban	Igen	Igen	Nem	Google							Elektronikus folyóiratok	Nem		Igen	a 3.-4. évfolyamon	Igen, csak magyarul szeretek olvasni	Átlagos (3)	Átlagos (3)	Valamennyire értek hozzá (2)	Gyenge (1)	Valamennyire értek hozzá (2)	Átlagos (3)	Többé-kevésbé értem a jelentését	Nem ismerem a jelentését, de szeretném megismerni	Értem a jelentését, és másoknak is el tudnám magyarázni	Többé-kevésbé értem a jelentését	Nem ismerem a jelentését, de szeretném megismerni	Nem ismerem a jelentését, de szeretném megismerni	Értem a jelentését, és másoknak is el tudnám magyarázni	Értem a jelentését, és másoknak is el tudnám magyarázni	Értem a jelentését, és másoknak is el tudnám magyarázni	Nem ismerem a jelentését, de szeretném megismerni	Értem a jelentését, és másoknak is el tudnám magyarázni	Értem a jelentését, és másoknak is el tudnám magyarázni	Értem a jelentését, és másoknak is el tudnám magyarázni
14	https://online-kerdoiv.com/index/view/hash/f505d52a49dd686dada6511e6d93f5bb/r/A5u8S0eqEp3zUJT3szqEGe0TkRijaJuHv7lW3wo0KATTsSSlaSSB5s0QzTWZ8efHBHHoXfK3YTgszQ4SSlaSSEatdFoFzkUWSSlaSSMWcxFhaSSlaSSZzL7HC2gixySIZkkLr7WQHCtSSlaSSp5KWWUzSSlaSSSSePPunCgHB30QWKVQ57xqJefccrPUaTDFnZ5PDTWqJSSlaSSQ9kA%3D	Nő	Debreceni Egyetem		Mesterképzési (Msc)	Egészségügyi tanár (Msc)		Levelezős	Első	Igen	Igen	Igen	Igen	Havonta vagy ritkábban	Igen	Igen	Igen	Medscape							Nyomtatott szakkönyvek	Igen	Igen	Igen	a 3.-4. évfolyamon	Igen, csak magyarul szeretek olvasni	Átlagos (3)	Átlagos (3)	Átlagos (3)	Valamennyire értek hozzá (2)	Átlagos (3)	Átlagosnál jobb (4)	Értem a jelentését, és másoknak is el tudnám magyarázni	Többé-kevésbé értem a jelentését	Értem a jelentését, és másoknak is el tudnám magyarázni	Értem a jelentését, és másoknak is el tudnám magyarázni	Értem a jelentését, és másoknak is el tudnám magyarázni	Többé-kevésbé értem a jelentését	Értem a jelentését, és másoknak is el tudnám magyarázni	Értem a jelentését, és másoknak is el tudnám magyarázni	Értem a jelentését, és másoknak is el tudnám magyarázni	Értem a jelentését, és másoknak is el tudnám magyarázni	Értem a jelentését, és másoknak is el tudnám magyarázni	Értem a jelentését, és másoknak is el tudnám magyarázni	Értem a jelentését, és másoknak is el tudnám magyarázni
15	https://online-kerdoiv.com/index/view/hash/f505d52a49dd686dada6511e6d93f5bb/r/GdTQOqRsPW7T1PPluSS1RnTzjBJkZ9YSSlaSSF98BBmdB7yPPluSSQiOTQ8pHYqzLhLhJtkd9SSlaSSlmSSlaSSELM4Piu3VXl5GRJ8z00f7jg50jsq5EXRNo2bfgcVzxPPluSSZ0EbPicJCJrSSlaSSKI1WJbT7wKFSSePPMDSSlaSSpAEEPPluSSACSIGanqpWuY0SSlaSSH4fzDB2HTPPluSSxv6bj4tWuDc%3D	Férfi	Debreceni Egyetem		Alapképzési (Bsc)	Mentőtiszt (Bsc)		Nappali	Harmadik	Nem	Igen	Nem		Hetente	Igen	Igen	Igen	Google							Nyomtatott folyóiratok	Nem		Igen	a 3.-4. évfolyamon	Nem, az angol és magyar nyelvű forrásokat egyaránt elolvasom	Haladó szintű (5)	Haladó szintű (5)	Haladó szintű (5)	Átlagos (3)	Haladó (5)	Haladó szintű (5)	Nem ismerem a jelentését, de szeretném megismerni	Nem ismerem a jelentését, de szeretném megismerni	Többé-kevésbé értem a jelentését	Értem a jelentését, és másoknak is el tudnám magyarázni	Többé-kevésbé értem a jelentését	Nem ismerem a jelentését, de szeretném megismerni	Értem a jelentését, és másoknak is el tudnám magyarázni	Értem a jelentését, és másoknak is el tudnám magyarázni	Nem ismerem a jelentését, de szeretném megismerni	Értem a jelentését, és másoknak is el tudnám magyarázni	Értem a jelentését, és másoknak is el tudnám magyarázni	Értem a jelentését, és másoknak is el tudnám magyarázni	Értem a jelentését, és másoknak is el tudnám magyarázni
16	https://online-kerdoiv.com/index/view/hash/f505d52a49dd686dada6511e6d93f5bb/r/opjKVnDh9nbxmPPluSSHYuYhoo8hflgsD3mZMfohtGpIdA3CUknLh6YSVB83BHiJnxHi2RS3IoloxPPluSS2T1xypVVWxt2nFlPav70zUm9EzRRuuwN6WAG3hDuQkHqKtg8lubZr4BSSePPYdHjsJQVPPPluSS1PjSSlaSS68R7OqzurNZ5zE3nFvSzGEfFrBNvU%3D	Nő	Debreceni Egyetem		Alapképzési (Bsc)	Szülésznő (Bsc)		Nappali	Első	Nem	Nem	Igen	Nem	Hetente	Igen	Igen	Nem	Google							Nyomtatott szakkönyvek	Nem		Nem		Igen, csak magyarul szeretek olvasni	Átlagosnál jobb (4)	Átlagos (3)	Gyenge (1)	Gyenge (1)	Valamennyire értek hozzá (2)	Átlagosnál jobb (4)	Többé-kevésbé értem a jelentését	Nem ismerem a jelentését, de szerintem nem is hasznos számomra	Értem a jelentését, és másoknak is el tudnám magyarázni	Értem a jelentését, és másoknak is el tudnám magyarázni	Nem ismerem a jelentését, de szeretném megismerni	Nem ismerem a jelentését, de szerintem nem is hasznos számomra	Többé-kevésbé értem a jelentését	Értem a jelentését, és másoknak is el tudnám magyarázni	Nem ismerem a jelentését, de szeretném megismerni	Nem ismerem a jelentését, de szeretném megismerni	Nem ismerem a jelentését, de szeretném megismerni	Értem a jelentését, és másoknak is el tudnám magyarázni	Nem ismerem a jelentését, de szeretném megismerni
17	https://online-kerdoiv.com/index/view/hash/f505d52a49dd686dada6511e6d93f5bb/r/sPASSlaSS4K4rBIph7eviAIyA92Efiol9w77RdLPPluSSYbLBmRSSlaSSc7i9r1OHKVSNG4AiHpcmwGy6hg2a25BSSlaSS1xjnQSSlaSSbXwdJ6g41sO8SfpdfaGMyV8VQYNQMlbfpDbPnFHZFl4CTX1HSSePPEcUHiK3s87fVvuf5MWSbbLqSSlaSSZx4JU4aACGQRHhJCU2c%3D	Férfi	Debreceni Egyetem		Alapképzési (Bsc)	Mentőtiszt (Bsc)		Nappali	Negyedik	Nem	Nem	Nem		Hetente	Igen	Igen	Igen	Medscape							Nyomtatott szakkönyvek	Nem		Igen	a 3.-4. évfolyamon	Igen, csak magyarul szeretek olvasni	Átlagos (3)	Átlagosnál jobb (4)	Valamennyire értek hozzá (2)	Gyenge (1)	Átlagos (3)	Valamennyire értek hozzá (2)	Többé-kevésbé értem a jelentését	Többé-kevésbé értem a jelentését	Értem a jelentését, és másoknak is el tudnám magyarázni	Értem a jelentését, és másoknak is el tudnám magyarázni	Nincs véleményem ezzel kapcsolatos	Nincs véleményem ezzel kapcsolatos	Nincs véleményem ezzel kapcsolatos	Nincs véleményem ezzel kapcsolatosan	Nincs véleményem ezzel kapcsolatosan	Nincs véleményem ezzel kapcsolatosan	Nem ismerem a jelentését, de szerintem nem is hasznos számomra	Értem a jelentését, és másoknak is el tudnám magyarázni	Nem ismerem a jelentését, de szerintem nem is hasznos számomra
18	https://online-kerdoiv.com/index/view/hash/f505d52a49dd686dada6511e6d93f5bb/r/DHBRZXbQYu7sPPluSScV6SSlaSSEXOnJMuJg6LhV7Y3SuUEGA8RjX1Xea3B2QHfpyutCGDxwUJKBRPxL2BVfCe0AkBtGAKb89zv5zePPluSS1zhJFdNWgWO0yoNmBo3wLBvsHlDP5Ex2X8tSSePPSpC5IwpOdh7UDmeYioYWb2yrJQvg4TFX51Ceu2ZMVRA%3D	Nő	Debreceni Egyetem		Alapképzési (Bsc)	Egézségügyi ügyvitel szervező (Bsc)		Nappali	Második	Nem	Nem	Nem		Havonta vagy ritkábban	Igen	Igen	Igen	Google Scholar							Elektronikus folyóiratok	Nem		Igen	az 1.-2. évfolyamon	Nem, az angol és magyar nyelvű forrásokat egyaránt elolvasom	Átlagosnál jobb (4)	Átlagosnál jobb (4)	Átlagosnál jobb (4)	Átlagos (3)	Átlagos (3)	Átlagosnál jobb (4)	Nem ismerem a jelentését, de szeretném megismerni	Nem ismerem a jelentését, de szeretném megismerni	Többé-kevésbé értem a jelentését	Többé-kevésbé értem a jelentését	Többé-kevésbé értem a jelentését	Nem ismerem a jelentését, de szeretném megismerni	Többé-kevésbé értem a jelentését	Többé-kevésbé értem a jelentését	Nem ismerem a jelentését, de szeretném megismerni	Többé-kevésbé értem a jelentését	Többé-kevésbé értem a jelentését	Többé-kevésbé értem a jelentését	Többé-kevésbé értem a jelentését
19	https://online-kerdoiv.com/index/view/hash/f505d52a49dd686dada6511e6d93f5bb/r/qrySSlaSS7melHoJCBX3f23bLmQ8VbVEGfIOBZPwSek6ltCkiIrKeIRJEgKrg6RvKGeeGPGlPwZnPPluSSFYPPluSSP3NnfYUECCtyE8L8tltGTo3O6f3ncbDNtFWvZ66rEDBlUkVXPFMSSlaSSSSSePPOtICTaG71mEBFPPluSSDIqA1Z6PblAhdPPluSS1vh00kJor5sBu7I%3D	Nő	Debreceni Egyetem		Alapképzési (Bsc)	Ápoló (Bsc)		Levelezős	Második	Igen	Nem	Nem		Havonta vagy ritkábban	Igen	Igen	Nem	Google							Egészségügyi szakemberek véleményének megismerése	Igen	Igen	Igen	a 3.-4. évfolyamon	Igen, csak magyarul szeretek olvasni	Átlagos (3)	Átlagos (3)	Gyenge (1)	Valamennyire értek hozzá (2)	Valamennyire értek hozzá (2)	Átlagosnál jobb (4)	Értem a jelentését, és másoknak is el tudnám magyarázni	Nem ismerem a jelentését, de szeretném megismerni	Értem a jelentését, és másoknak is el tudnám magyarázni	Értem a jelentését, és másoknak is el tudnám magyarázni	Nem ismerem a jelentését, de szeretném megismerni	Nem ismerem a jelentését, de szeretném megismerni	Nem ismerem a jelentését, de szeretném megismerni	Többé-kevésbé értem a jelentését	Többé-kevésbé értem a jelentését	Nem ismerem a jelentését, de szeretném megismerni	Többé-kevésbé értem a jelentését	Értem a jelentését, és másoknak is el tudnám magyarázni	Többé-kevésbé értem a jelentését
20	https://online-kerdoiv.com/index/view/hash/f505d52a49dd686dada6511e6d93f5bb/r/xasVe3eYzOHYMeerna9cEB4x7015YLQSSlaSSHfs9PDNdngZPQhJjJaFJYYoIcSSlaSSPayUmBPPluSSecSuLQmQ5ZZNM5FWSYpEE1Eh5qGsUl0Ch3neS4nKL5gCb0C3Y5CwHV57mekFzlMSSePPhnSSlaSSTPPluSS53SDYQyu1dJLL3YWvxfEYCmYL5Bsf5fSJVa4ew%3D	Nő	Debreceni Egyetem		Mesterképzési (Msc)	Ápolás (Msc)		Nappali	Első	Igen	Nem	Nem		Havonta vagy ritkábban	Igen	Igen	Igen	Google							Nyomtatott szakkönyvek	Nem		Igen	a 3.-4. évfolyamon	Igen, csak magyarul szeretek olvasni	Átlagos (3)	Átlagos (3)	Átlagos (3)	Valamennyire értek hozzá (2)	Átlagos (3)	Átlagosnál jobb (4)	Értem a jelentését, és másoknak is el tudnám magyarázni	Nem ismerem a jelentését, de szeretném megismerni	Értem a jelentését, és másoknak is el tudnám magyarázni	Értem a jelentését, és másoknak is el tudnám magyarázni	Nem ismerem a jelentését, de szeretném megismerni	Nem ismerem a jelentését, de szeretném megismerni	Értem a jelentését, és másoknak is el tudnám magyarázni	Értem a jelentését, és másoknak is el tudnám magyarázni	Értem a jelentését, és másoknak is el tudnám magyarázni	Többé-kevésbé értem a jelentését	Értem a jelentését, és másoknak is el tudnám magyarázni	Értem a jelentését, és másoknak is el tudnám magyarázni	Többé-kevésbé értem a jelentését
21	https://online-kerdoiv.com/index/view/hash/f505d52a49dd686dada6511e6d93f5bb/r/SSlaSSutu1NlRCgOiIVhrJPPluSSEigPjGSSlaSSWUVPsrVYvKieS3H9pDhNLbHKuD2A1KL4c0pwdiabvzlgUmQP6bco8IE1JQLF4YRt2OPPluSSS3dlqQnB7O1gjeY6c5Di1JxmFWOKKGU9aVedSSePPcWcFivMSuMAsCfqrEd6s4xR61mw10qrvZcwrXPIY23Y%3D	Férfi	Debreceni Egyetem		Alapképzési (Bsc)	Mentőtiszt (Bsc)		Nappali	Harmadik	Nem	Nem	Igen	Igen	Havonta vagy ritkábban	Igen	Igen	Igen	Medscape							Nyomtatott szakkönyvek	Nem		Igen	az 1.-2. évfolyamon	Igen, csak magyarul szeretek olvasni	Átlagos (3)	Átlagosnál jobb (4)	Átlagos (3)	Valamennyire értek hozzá (2)	Átlagos (3)	Átlagosnál jobb (4)	Nem ismerem a jelentését, de szeretném megismerni	Nem ismerem a jelentését, de szeretném megismerni	Értem a jelentését, és másoknak is el tudnám magyarázni	Értem a jelentését, és másoknak is el tudnám magyarázni	Nem ismerem a jelentését, de szeretném megismerni	Nem ismerem a jelentését, de szeretném megismerni	Nem ismerem a jelentését, de szeretném megismerni	Többé-kevésbé értem a jelentését	Nem ismerem a jelentését, de szeretném megismerni	Nem ismerem a jelentését, de szeretném megismerni	Többé-kevésbé értem a jelentését	Többé-kevésbé értem a jelentését	Értem a jelentését, és másoknak is el tudnám magyarázni
22	https://online-kerdoiv.com/index/view/hash/f505d52a49dd686dada6511e6d93f5bb/r/cYsPdv2xkHOzzs7yfU5j9BPPluSSwHAdICCMmWSSlaSSLsFlTH9JZMjDiQgC2xWEOOFqhKP94rZVKk2Y2holCyvS7Vwe99SSlaSSvH5Ki12anYzUrD5uu0pIOgYYqTkC4dwPZO865tqNqDdSSePPnDxjIf6NpromB4z8Nd4vLExwiaxzxZrx1hugKAO1whk%3D	Nő	Debreceni Egyetem		Alapképzési (Bsc)	Szülésznő (Bsc)		Nappali	Második	Nem	Nem	Nem		Havonta vagy ritkábban	Igen	Igen	Igen	Pubmed/Medline							Elektronikus szakkönyvek	Nem		Igen	a 3.-4. évfolyamon	Igen, csak magyarul szeretek olvasni	Átlagos (3)	Átlagos (3)	Valamennyire értek hozzá (2)	Gyenge (1)	Gyenge (1)	Valamennyire értek hozzá (2)	Nem ismerem a jelentését, de szerintem nem is hasznos számomra	Nem ismerem a jelentését, de szerintem nem is hasznos számomra	Többé-kevésbé értem a jelentését	Többé-kevésbé értem a jelentését	Többé-kevésbé értem a jelentését	Nem ismerem a jelentését, de szerintem nem is hasznos számomra	Nem ismerem a jelentését, de szerintem nem is hasznos számomra	Nem ismerem a jelentését, de szeretném megismerni	Nem ismerem a jelentését, de szeretném megismerni	Nem ismerem a jelentését, de szeretném megismerni	Nem ismerem a jelentését, de szeretném megismerni	Nem ismerem a jelentését, de szeretném megismerni	Többé-kevésbé értem a jelentését
23	https://online-kerdoiv.com/index/view/hash/f505d52a49dd686dada6511e6d93f5bb/r/tYb89blijbek9l0FvZqqRmpLvbY09nbT3w4WnPPluSS6Ty0veBQMeQeHGpL7e6msKH2SVmBilW17ODE6oUuJobo48VgoRG0WNGLEbYbPD2jXiSSlaSS3Zgx485Ok04SSlaSSIiKGwr6nu2RSSePPl2rFwy1QnUPiqgKtGjNxU4E0ufdOe8ep0x8yk12Ow6Q%3D	Férfi	Debreceni Egyetem		Mesterképzési (Msc)	Egészségügyi tanár (Msc)		Levelezős	Első	Igen	Nem	Nem		Havonta vagy ritkábban	Igen	Igen	Nem	Google							Szakmai irányelvek	Igen	Igen	Igen	a 3.-4. évfolyamon	Igen, csak magyarul szeretek olvasni	Átlagos (3)	Átlagos (3)	Átlagos (3)	Valamennyire értek hozzá (2)	Valamennyire értek hozzá (2)	Átlagos (3)	Többé-kevésbé értem a jelentését	Nem ismerem a jelentését, de szeretném megismerni	Nem ismerem a jelentését, de szeretném megismerni	Nem ismerem a jelentését, de szeretném megismerni	Nem ismerem a jelentését, de szeretném megismerni	Nem ismerem a jelentését, de szeretném megismerni	Többé-kevésbé értem a jelentését	Többé-kevésbé értem a jelentését	Nem ismerem a jelentését, de szeretném megismerni	Nem ismerem a jelentését, de szeretném megismerni	Többé-kevésbé értem a jelentését	Értem a jelentését, és másoknak is el tudnám magyarázni	Többé-kevésbé értem a jelentését
24	https://online-kerdoiv.com/index/view/hash/f505d52a49dd686dada6511e6d93f5bb/r/FVfuxIWSSlaSSuCDSFlQZKQ8UuN04CzThu1PPluSSpCnB6f1q8Sthtqv7nXHJyhWVbbB9zHn3Clh7aadL5x56yZPfyls3gXLTfK5MvdZ4TjqfsBbL6LfNKCDEaTcBvFzkcb5M0hOYUSSePPF7LELNPPluSSg0JPADxPPluSSGJ8E2Fk9riUkG3BeOGWPPluSSbVmaOGz8%3D	Nő	Debreceni Egyetem		Mesterképzési (Msc)	Egészségügyi szociális munka (Msc)		Levelezős	Második	Nem	Nem	Igen	Nem	Havonta vagy ritkábban	Igen	Igen	Nem	Google							Elektronikus folyóiratok	Nem		Igen	a 3.-4. évfolyamon	Igen, csak magyarul szeretek olvasni	Átlagos (3)	Átlagos (3)	Valamennyire értek hozzá (2)	Gyenge (1)	Valamennyire értek hozzá (2)	Valamennyire értek hozzá (2)	Értem a jelentését, és másoknak is el tudnám magyarázni	Többé-kevésbé értem a jelentését	Értem a jelentését, és másoknak is el tudnám magyarázni	Értem a jelentését, és másoknak is el tudnám magyarázni	Értem a jelentését, és másoknak is el tudnám magyarázni	Nem ismerem a jelentését, de szeretném megismerni	Nem ismerem a jelentését, de szeretném megismerni	Értem a jelentését, és másoknak is el tudnám magyarázni	Nem ismerem a jelentését, de szeretném megismerni	Nem ismerem a jelentését, de szeretném megismerni	Értem a jelentését, és másoknak is el tudnám magyarázni	Többé-kevésbé értem a jelentését	Értem a jelentését, és másoknak is el tudnám magyarázni
25	https://online-kerdoiv.com/index/view/hash/f505d52a49dd686dada6511e6d93f5bb/r/S0Jl9TQ6Dt5sOczqLucy3jmL2bEasj1UcuHynv8PPluSScpvzUW8DKuiQLylPQVAHrSSlaSSHmm77JCH8eqdbaQSSlaSS4K306eD9g3jggQctaANTLwRNfflPkntfFLaDESgcdNXUui5ovgSSePP0PPluSSMy7R0kW1clPPluSSAsUKxmTNkmQjttjXFAbxB3nGdrctHA%3D	Nő	Debreceni Egyetem		Alapképzési (Bsc)	Ápoló (Bsc)		Levelezős	Negyedik	Igen	Nem	Igen	Nem	Havonta vagy ritkábban	Igen	Igen	Nem	Google							Nyomtatott szakkönyvek	Nem		Igen	a 3.-4. évfolyamon	Igen, csak magyarul szeretek olvasni	Átlagos (3)	Átlagos (3)	Átlagos (3)	Valamennyire értek hozzá (2)	Valamennyire értek hozzá (2)	Átlagos (3)	Értem a jelentését, és másoknak is el tudnám magyarázni	Nem ismerem a jelentését, de szerintem nem is hasznos számomra	Többé-kevésbé értem a jelentését	Értem a jelentését, és másoknak is el tudnám magyarázni	Többé-kevésbé értem a jelentését	Többé-kevésbé értem a jelentését	Többé-kevésbé értem a jelentését	Értem a jelentését, és másoknak is el tudnám magyarázni	Nem ismerem a jelentését, de szeretném megismerni	Nem ismerem a jelentését, de szeretném megismerni	Többé-kevésbé értem a jelentését	Értem a jelentését, és másoknak is el tudnám magyarázni	Többé-kevésbé értem a jelentését
26	https://online-kerdoiv.com/index/view/hash/f505d52a49dd686dada6511e6d93f5bb/r/HsK9jLvxtJPmdc79WOl40UkbgB231gLV8QZQKu89sFtjCIHQ2456j5NTOO7cI8dqvJ3cM5MAVbWXL5nF8Iy5tHYAlwoHj8pxnLtm19bpmcNPHPPluSSPPluSSTChEvUA1tlkgSD7ssSSePPiE2lfrpQo2cyY9SjIN418RNu9fx7BH7tqo9kpDUyRtg%3D	Nő	Debreceni Egyetem		Alapképzési (Bsc)	Ápoló (Bsc)		Levelezős	Első	Igen	Nem	Nem		Havonta vagy ritkábban	Igen	Igen	Nem	Google							Nyomtatott szakkönyvek	Nem		Igen	a 3.-4. évfolyamon	Nem, az angol és magyar nyelvű forrásokat egyaránt elolvasom	Átlagos (3)	Átlagos (3)	Valamennyire értek hozzá (2)	Valamennyire értek hozzá (2)	Átlagosnál jobb (4)	Átlagosnál jobb (4)	Értem a jelentését, és másoknak is el tudnám magyarázni	Nem ismerem a jelentését, de szeretném megismerni	Nem ismerem a jelentését, de szeretném megismerni	Értem a jelentését, és másoknak is el tudnám magyarázni	Nem ismerem a jelentését, de szeretném megismerni	Többé-kevésbé értem a jelentését	Értem a jelentését, és másoknak is el tudnám magyarázni	Többé-kevésbé értem a jelentését	Nem ismerem a jelentését, de szeretném megismerni	Nem ismerem a jelentését, de szeretném megismerni	Többé-kevésbé értem a jelentését	Értem a jelentését, és másoknak is el tudnám magyarázni	Értem a jelentését, és másoknak is el tudnám magyarázni
27	https://online-kerdoiv.com/index/view/hash/f505d52a49dd686dada6511e6d93f5bb/r/fNNmU3SSlaSSP2PYg9cpICPPluSSgVAjJS3DK8Mm6OhGRRzDGw0ULIiXy9W9gBl5sDyXO1qWiN8PdmOePOiHsucWI1PPluSSvnYJAgLr9qccLsyzqLmgeKDR5dek6jn5nUED8nbTLA5j4iPPluSSSSePPgFxxYyq2sC4Umi5vVHGxVstSSlaSSBNW7pTgtN0bzK3WspMk%3D	Nő	Debreceni Egyetem		Alapképzési (Bsc)	Ápoló (Bsc)		Nappali	Harmadik	Nem	Nem	Igen	Igen	Havonta vagy ritkábban	Igen	Igen	Igen	Google Scholar							Nyomtatott szakkönyvek	Nem		Igen	a 3.-4. évfolyamon	Nem, az angol és magyar nyelvű forrásokat egyaránt elolvasom	Átlagos (3)	Átlagos (3)	Valamennyire értek hozzá (2)	Valamennyire értek hozzá (2)	Átlagos (3)	Átlagosnál jobb (4)	Értem a jelentését, és másoknak is el tudnám magyarázni	Nem ismerem a jelentését, de szeretném megismerni	Értem a jelentését, és másoknak is el tudnám magyarázni	Értem a jelentését, és másoknak is el tudnám magyarázni	Nem ismerem a jelentését, de szeretném megismerni	Nem ismerem a jelentését, de szeretném megismerni	Többé-kevésbé értem a jelentését	Értem a jelentését, és másoknak is el tudnám magyarázni	Nem ismerem a jelentését, de szeretném megismerni	Többé-kevésbé értem a jelentését	Nem ismerem a jelentését, de szeretném megismerni	Értem a jelentését, és másoknak is el tudnám magyarázni	Többé-kevésbé értem a jelentését
28	https://online-kerdoiv.com/index/view/hash/f505d52a49dd686dada6511e6d93f5bb/r/4SIdsaXmABUwtHNYG8aPPluSSVFT5XCZInkugxFXOu1XLEOJ7np1464yMPPluSS4Bx4imLAFrSpiaGDpBp7H5joV71U2wQybqB1jgSSlaSS2qHGOPY2W6jdOnBCc8Z6KjprSPPluSSZlYkSOFKXySSePPGUjQvZgfnTHfNIsg77Pu1E0j4viY8dsyEPPluSShj4SSlaSS09E3A%3D	Férfi	Debreceni Egyetem		Alapképzési (Bsc)	Egézségügyi ügyvitel szervező (Bsc)		Levelezős	Harmadik	Igen	Nem	Igen	Igen	Hetente	Igen	Igen	Igen	Google							Szakmai irányelvek	Nem		Igen	a 3.-4. évfolyamon	Nem, az angol és magyar nyelvű forrásokat egyaránt elolvasom	Átlagosnál jobb (4)	Átlagosnál jobb (4)	Valamennyire értek hozzá (2)	Gyenge (1)	Átlagos (3)	Átlagosnál jobb (4)	Nem ismerem a jelentését, de szeretném megismerni	Nem ismerem a jelentését, de szeretném megismerni	Értem a jelentését, és másoknak is el tudnám magyarázni	Értem a jelentését, és másoknak is el tudnám magyarázni	Értem a jelentését, és másoknak is el tudnám magyarázni	Értem a jelentését, és másoknak is el tudnám magyarázni	Értem a jelentését, és másoknak is el tudnám magyarázni	Többé-kevésbé értem a jelentését	Értem a jelentését, és másoknak is el tudnám magyarázni	Többé-kevésbé értem a jelentését	Értem a jelentését, és másoknak is el tudnám magyarázni	Értem a jelentését, és másoknak is el tudnám magyarázni	Többé-kevésbé értem a jelentését
29	https://online-kerdoiv.com/index/view/hash/f505d52a49dd686dada6511e6d93f5bb/r/Nus1OP0mPUB3GqlaQPPluSSoqt6w8in7dqqMtmf3ZN7ee4iT2EbV97RsoJzdkUoMXuNrYSoPQUuIw4Y7ujijObR95cZaFc69KZ31A8mLjPPluSS5svIxKkPPluSSRlD2YlKalHgb2BiYN1hSSePPSSlaSS5VlUpfTNvAJnNv3UO6QDUFeb9vN8ACb67cPQTRRLZE%3D	Férfi	Debreceni Egyetem		Alapképzési (Bsc)	Mentőtiszt (Bsc)		Nappali	Első	Nem	Nem	Igen	Nem	Havonta vagy ritkábban	Igen	Igen	Igen	Wikipedia							Elektonikus média	Nem		Igen	a 3.-4. évfolyamon	Nem, az angol és magyar nyelvű forrásokat egyaránt elolvasom	Valamennyire értek hozzá (2)	Átlagos (3)	Valamennyire értek hozzá (2)	Gyenge (1)	Gyenge (1)	Valamennyire értek hozzá (2)	Nem ismerem a jelentését, de szeretném megismerni	Nem ismerem a jelentését, de szeretném megismerni	Többé-kevésbé értem a jelentését	Többé-kevésbé értem a jelentését	Nem ismerem a jelentését, de szeretném megismerni	Nem ismerem a jelentését, de szeretném megismerni	Többé-kevésbé értem a jelentését	Értem a jelentését, és másoknak is el tudnám magyarázni	Nincs véleményem ezzel kapcsolatosan	Nincs véleményem ezzel kapcsolatosan	Többé-kevésbé értem a jelentését	Értem a jelentését, és másoknak is el tudnám magyarázni	Többé-kevésbé értem a jelentését
30	https://online-kerdoiv.com/index/view/hash/f505d52a49dd686dada6511e6d93f5bb/r/odClH6QxYvZVxMI9CpTLAIyzDnjRMPPluSSzibQQ43YyNL70UCta0FXNTw9560n9ZkL7s9xCHCnnodTz6UvOqxpGhnjRPx0uPPluSSnSSlaSSJDzausE8tZY38UJYJdWryJeEKGSwEXKf34SSePPQ4mwSgWxV40qUI54teLzhFYa1oSJXiDuSSlaSSjaRmAIdBs0%3D	Nő	Szegedi Tudományegetem		Alapképzési (Bsc)	Ápoló (Bsc)		Nappali	Negyedik	Nem	Nem	Igen	Igen	Havonta vagy ritkábban	Igen	Igen	Igen	Pubmed/Medline							Elektronikus szakkönyvek	Nem		Igen	az 1.-2. évfolyamon	Igen, csak magyarul szeretek olvasni	Átlagosnál jobb (4)	Átlagosnál jobb (4)	Valamennyire értek hozzá (2)	Gyenge (1)	Átlagosnál jobb (4)	Haladó szintű (5)	Többé-kevésbé értem a jelentését	Nem ismerem a jelentését, de szeretném megismerni	Értem a jelentését, és másoknak is el tudnám magyarázni	Értem a jelentését, és másoknak is el tudnám magyarázni	Nem ismerem a jelentését, de szerintem nem is hasznos számomra	Nem ismerem a jelentését, de szerintem nem is hasznos számomra	Nem ismerem a jelentését, de szeretném megismerni	Értem a jelentését, és másoknak is el tudnám magyarázni	Nem ismerem a jelentését, de szeretném megismerni	Nem ismerem a jelentését, de szeretném megismerni	Értem a jelentését, és másoknak is el tudnám magyarázni	Értem a jelentését, és másoknak is el tudnám magyarázni	Többé-kevésbé értem a jelentését
31	https://online-kerdoiv.com/index/view/hash/f505d52a49dd686dada6511e6d93f5bb/r/OyTw3I8r3JF63fWzURwIObOgTURM2pwBQejJPPluSSCIJJa7IuMQZcjrSSlaSSEYSUPCjcWbo2gweAG0PRKXwLDHU9iJisKE3FqzK2nC3Ul140vG0ZQsj45ELe7nlFYcLbrkqpISPPSSePPzwonyOcToOSIVDNnMnv57jjeG3uaGlIfWFeBhftcwq4%3D	Nő	Szegedi Tudományegetem		Alapképzési (Bsc)	Ápoló (Bsc)		Levelezős	Harmadik	Igen	Nem	Nem		Hetente	Igen	Igen	Igen	Medscape							Oktatási jegyzetek	Igen	Igen	Igen	a 3.-4. évfolyamon	Nem, az angol és magyar nyelvű forrásokat egyaránt elolvasom	Átlagos (3)	Valamennyire értek hozzá (2)	Valamennyire értek hozzá (2)	Valamennyire értek hozzá (2)	Átlagos (3)	Haladó szintű (5)	Többé-kevésbé értem a jelentését	Többé-kevésbé értem a jelentését	Többé-kevésbé értem a jelentését	Többé-kevésbé értem a jelentését	Többé-kevésbé értem a jelentését	Többé-kevésbé értem a jelentését	Többé-kevésbé értem a jelentését	Többé-kevésbé értem a jelentését	Többé-kevésbé értem a jelentését	Többé-kevésbé értem a jelentését	Értem a jelentését, és másoknak is el tudnám magyarázni	Értem a jelentését, és másoknak is el tudnám magyarázni	Többé-kevésbé értem a jelentését
32	https://online-kerdoiv.com/index/view/hash/f505d52a49dd686dada6511e6d93f5bb/r/pV72aIIIC9YYXO70ojgVnFWZOB4YpYdMJwR0eGS6AtMBiBOOjIECtHjLl0ayjTEPPluSSRBjNAGSSlaSSuj5OGkTdHe2nzgePPluSSdY6gAhQECCJ8yr63VCMSfrTOKg41Crar2PPluSSuDSHfnrSSePPrkoDlTogqNitknhOPybgQMOL7UEZAthNQXIaSDYBT7s%3D	Nő	Szegedi Tudományegetem		Alapképzési (Bsc)	Gyógytornász (Bsc)		Nappali	Negyedik	Nem	Igen	Nem		Havonta vagy ritkábban	Igen	Igen	Igen	Pubmed/Medline							Nyomtatott szakkönyvek	Nem	Igen	Igen	a 3.-4. évfolyamon	Igen, csak magyarul szeretek olvasni	Átlagos (3)	Valamennyire értek hozzá (2)	Gyenge (1)	Gyenge (1)	Átlagos (3)	Átlagos (3)	Nem ismerem a jelentését, de szeretném megismerni	Nem ismerem a jelentését, de szeretném megismerni	Többé-kevésbé értem a jelentését	Értem a jelentését, és másoknak is el tudnám magyarázni	Többé-kevésbé értem a jelentését	Nem ismerem a jelentését, de szeretném megismerni	Többé-kevésbé értem a jelentését	Értem a jelentését, és másoknak is el tudnám magyarázni	Többé-kevésbé értem a jelentését	Nem ismerem a jelentését, de szeretném megismerni	Értem a jelentését, és másoknak is el tudnám magyarázni	Értem a jelentését, és másoknak is el tudnám magyarázni	Nem ismerem a jelentését, de szeretném megismerni
33	https://online-kerdoiv.com/index/view/hash/f505d52a49dd686dada6511e6d93f5bb/r/3l7uf7GVxdAKlpkD4jRfbR3DwlxLtuo4wyqtVaX2o9PnB8BQXFV6LB50bkQzvQy8qHOuNQCy95V9dY7TElYQCn7ifUMe2tZPPluSSiqSD2FTSjymFHzNCtCYkQtwZ5xocDq7jSSePP0It1QuOSSlaSSe0wJxwaGxje24CnSiQPPluSSAPp4UeNV4SSlaSSPPluSSMhISg%3D	Nő	Szegedi Tudományegetem		Alapképzési (Bsc)	Védőnő (Bsc)		Nappali	Első	Nem	Nem	Nem		Naponta	Igen	Igen	Nem	Google							Nyomtatott szakkönyvek	Igen	Igen	Igen	az 1.-2. évfolyamon	Igen, csak magyarul szeretek olvasni	Átlagos (3)	Átlagosnál jobb (4)	Átlagos (3)	Átlagosnál jobb (4)	Átlagosnál jobb (4)	Átlagosnál jobb (4)	Értem a jelentését, és másoknak is el tudnám magyarázni	Többé-kevésbé értem a jelentését	Nem ismerem a jelentését, de szeretném megismerni	Többé-kevésbé értem a jelentését	Értem a jelentését, és másoknak is el tudnám magyarázni	Nem ismerem a jelentését, de szerintem nem is hasznos számomra	Többé-kevésbé értem a jelentését	Értem a jelentését, és másoknak is el tudnám magyarázni	Nem ismerem a jelentését, de szeretném megismerni	Nem ismerem a jelentését, de szeretném megismerni	Értem a jelentését, és másoknak is el tudnám magyarázni	Többé-kevésbé értem a jelentését	Nem ismerem a jelentését, de szeretném megismerni
34	https://online-kerdoiv.com/index/view/hash/f505d52a49dd686dada6511e6d93f5bb/r/deIKJlNZ3TkSPPluSSTH1xyHL0OkoXuMPMDb9lpHgc81ISSlaSSaKZ1tdos5rnYBgzglYzruisjhCIREwO1DkXIMaCmyKqhukG1hIY4x6yWcg50aalIuidiz60OSSlaSSF2g9geKk2ABrfVSSePPMN8MXGhCTYQBOzpuWTkFqEEyzixbusRVoV1f6W2JcmU%3D	Nő	Szegedi Tudományegetem		Alapképzési (Bsc)	Gyógytornász (Bsc)		Nappali	Második	Nem	Nem	Nem		Havonta vagy ritkábban	Igen	Igen	Nem	Google							Nyomtatott szakkönyvek	Nem		Igen	a 3.-4. évfolyamon	Nem, az angol és magyar nyelvű forrásokat egyaránt elolvasom	Átlagos (3)	Átlagos (3)	Átlagos (3)	Átlagos (3)	Átlagosnál jobb (4)	Átlagosnál jobb (4)	Többé-kevésbé értem a jelentését	Nem ismerem a jelentését, de szeretném megismerni	Többé-kevésbé értem a jelentését	Többé-kevésbé értem a jelentését	Nem ismerem a jelentését, de szeretném megismerni	Nem ismerem a jelentését, de szeretném megismerni	Nem ismerem a jelentését, de szeretném megismerni	Nem ismerem a jelentését, de szeretném megismerni	Nem ismerem a jelentését, de szeretném megismerni	Többé-kevésbé értem a jelentését	Többé-kevésbé értem a jelentését	Többé-kevésbé értem a jelentését	Többé-kevésbé értem a jelentését
35	https://online-kerdoiv.com/index/view/hash/f505d52a49dd686dada6511e6d93f5bb/r/OSSlaSSPiqZFoISFQHutcsCupifL5QxTXi0wOjBOFvwvMRufvAvUgqIEHJT22DUUTJtKzqjHSSSlaSSUj8PENI1CTyt4Dlb2iGNV3p2NI0wDo5u6bdYdGQkLI4JHZQHS7m3Q4nUPPluSS5VSSePPafPPluSSSSlaSSPPluSS59xEGrb8oPMlg7EMEJhZPPluSSWjxH4T3PbpySSlaSSU6nZE%3D	Nő	Szegedi Tudományegetem		Alapképzési (Bsc)	Gyógytornász (Bsc)		Nappali	Első	Nem	Nem	Igen	Igen	Havonta vagy ritkábban	Igen	Igen	Igen	Google							Nyomtatott szakkönyvek	Nem		Igen	a 3.-4. évfolyamon	Nem, az angol és magyar nyelvű forrásokat egyaránt elolvasom	Átlagosnál jobb (4)	Átlagosnál jobb (4)	Átlagos (3)	Valamennyire értek hozzá (2)	Átlagos (3)	Átlagosnál jobb (4)	Értem a jelentését, és másoknak is el tudnám magyarázni	Nem ismerem a jelentését, de szeretném megismerni	Többé-kevésbé értem a jelentését	Többé-kevésbé értem a jelentését	Többé-kevésbé értem a jelentését	Nem ismerem a jelentését, de szeretném megismerni	Nem ismerem a jelentését, de szeretném megismerni	Többé-kevésbé értem a jelentését	Nem ismerem a jelentését, de szeretném megismerni	Nem ismerem a jelentését, de szeretném megismerni	Értem a jelentését, és másoknak is el tudnám magyarázni	Értem a jelentését, és másoknak is el tudnám magyarázni	Többé-kevésbé értem a jelentését
36	https://online-kerdoiv.com/index/view/hash/f505d52a49dd686dada6511e6d93f5bb/r/iISSlaSSmyN6OfVtzFKh8PPluSSniMtKKiO1ynHXRsOS7tTT7oTsCpCblSSlaSSvnus46gIWdh4SSlaSSIWafFEHla0euagcR9CF1QEh8GATujZnOxXvDkhUyRjxFiLSSlaSSqUqnFofJeKcALuCnECPPluSS2SSePPk7yDTjn2Hc5FDjP0FpPlkbwEhZkdA6zLTPhBFcDAn4I%3D	Nő	Szegedi Tudományegetem		Alapképzési (Bsc)	Gyógytornász (Bsc)		Nappali	Harmadik	Nem	Nem	Nem		Havonta vagy ritkábban	Igen	Igen	Igen	Pubmed/Medline							Elektonikus média	Nem		Igen	a 3.-4. évfolyamon	Nem, az angol és magyar nyelvű forrásokat egyaránt elolvasom	Átlagosnál jobb (4)	Átlagos (3)	Átlagos (3)	Valamennyire értek hozzá (2)	Valamennyire értek hozzá (2)	Valamennyire értek hozzá (2)	Nem ismerem a jelentését, de szeretném megismerni	Nem ismerem a jelentését, de szeretném megismerni	Többé-kevésbé értem a jelentését	Többé-kevésbé értem a jelentését	Nem ismerem a jelentését, de szeretném megismerni	Nem ismerem a jelentését, de szeretném megismerni	Nem ismerem a jelentését, de szeretném megismerni	Nem ismerem a jelentését, de szeretném megismerni	Nem ismerem a jelentését, de szeretném megismerni	Nem ismerem a jelentését, de szeretném megismerni	Nem ismerem a jelentését, de szeretném megismerni	Többé-kevésbé értem a jelentését	Nem ismerem a jelentését, de szeretném megismerni
37	https://online-kerdoiv.com/index/view/hash/f505d52a49dd686dada6511e6d93f5bb/r/pyPfNsPCh9q0Dc1wRrX77UijfUlqVpaa92T5tP2SSlaSS5ISSlaSSmYLrdx7KABrPPluSSl0x2W0zkuc8acASOJLrLKDVNmmHzKu6ZUTSEBSSlaSSTUaHILwSSlaSSafPStv9jDg4YVfsfQSSlaSSklCZiGLRuSSePPSSlaSSgwPPluSS0eZYPPluSScKVKXCkJG6AgBkZCrfFttonlmhgcW7FXVk%3D	Nő	Szegedi Tudományegetem		Alapképzési (Bsc)		Dentálhigiénikus (Bsc)	Nappali	Negyedik	Nem	Nem	Nem		Soha	Igen	Igen	Igen	Google Scholar							Nyomtatott szakkönyvek	Nem		Nem		Igen, csak magyarul szeretek olvasni	Átlagosnál jobb (4)	Átlagos (3)	Valamennyire értek hozzá (2)	Valamennyire értek hozzá (2)	Valamennyire értek hozzá (2)	Átlagos (3)	Többé-kevésbé értem a jelentését	Nem ismerem a jelentését, de szeretném megismerni	Többé-kevésbé értem a jelentését	Többé-kevésbé értem a jelentését	Nem ismerem a jelentését, de szeretném megismerni	Nem ismerem a jelentését, de szeretném megismerni	Nem ismerem a jelentését, de szeretném megismerni	Nem ismerem a jelentését, de szeretném megismerni	Nem ismerem a jelentését, de szeretném megismerni	Többé-kevésbé értem a jelentését	Többé-kevésbé értem a jelentését	Nem ismerem a jelentését, de szeretném megismerni	Nem ismerem a jelentését, de szerintem nem is hasznos számomra
38	https://online-kerdoiv.com/index/view/hash/f505d52a49dd686dada6511e6d93f5bb/r/EDSSlaSS3KBCDFfXURPPluSSSFtR1zFMMlxMJ156fK8DoPPluSSCyQW2nEU4JlSSlaSSegUysPPluSSWonO8byLPv131ZNNnjzDrhTfkPRhVqEprO5qtfBYd4CFm1AENjSSlaSSNXiaqKXGnb3vNc7KnK57DvrSSePPRdym5mC6Sj6RiDpr4WsewhmfXpArVxlLSSlaSS2ypjjTKnSg%3D	Nő	Debreceni Egyetem		Alapképzési (Bsc)	Egézségügyi ügyvitel szervező (Bsc)		Levelezős	Harmadik	Igen	Nem	Nem		Hetente	Igen	Igen	Igen	Wikipedia							Elektonikus média	Igen	Igen	Igen	a 3.-4. évfolyamon	Nem, az angol és magyar nyelvű forrásokat egyaránt elolvasom	Átlagosnál jobb (4)	Átlagosnál jobb (4)	Átlagos (3)	Átlagos (3)	Átlagos (3)	Átlagos (3)	Többé-kevésbé értem a jelentését	Nincs véleményem ezzel kapcsolatosan	Értem a jelentését, és másoknak is el tudnám magyarázni	Nincs véleményem ezzel kapcsolatosan	Többé-kevésbé értem a jelentését	Nincs véleményem ezzel kapcsolatos	Nincs véleményem ezzel kapcsolatos	Többé-kevésbé értem a jelentését	Nincs véleményem ezzel kapcsolatosan	Nincs véleményem ezzel kapcsolatosan	Többé-kevésbé értem a jelentését	Nincs véleményem ezzel kapcsolatosan	Nincs véleményem ezzel kapcsolatosan
39	https://online-kerdoiv.com/index/view/hash/f505d52a49dd686dada6511e6d93f5bb/r/lVD4q8Oy498yEIKolT6Ryr8gWGS1g7m9872sbgYzkmUxvi6yyUtMZEjUGYU6ZgXAQ7Qq1aSv3Ps3QH0uPPluSSfSSlaSSRKrT8By2y4n5j2V4ChUuWdV3oRjKEcKCYMY9iAGyPPluSSXrNsSSePPi1TPPluSS2OLHExuD5NQh6tFa8IzuWRYokqND48rObZfmWmc%3D	Nő	Szegedi Tudományegetem		Alapképzési (Bsc)	Ápoló (Bsc)		Levelezős	Második	Igen	Nem	Igen	Nem	Naponta	Igen	Igen	Igen	Google							Nyomtatott szakkönyvek	Nem		Igen	az 1.-2. évfolyamon	Igen, csak magyarul szeretek olvasni	Valamennyire értek hozzá (2)	Valamennyire értek hozzá (2)	Valamennyire értek hozzá (2)	Valamennyire értek hozzá (2)	Valamennyire értek hozzá (2)	Átlagos (3)	Többé-kevésbé értem a jelentését	Nem ismerem a jelentését, de szeretném megismerni	Többé-kevésbé értem a jelentését	Többé-kevésbé értem a jelentését	Nem ismerem a jelentését, de szeretném megismerni	Nem ismerem a jelentését, de szeretném megismerni	Többé-kevésbé értem a jelentését	Nem ismerem a jelentését, de szeretném megismerni	Nem ismerem a jelentését, de szeretném megismerni	Nem ismerem a jelentését, de szeretném megismerni	Nem ismerem a jelentését, de szeretném megismerni	Többé-kevésbé értem a jelentését	Nem ismerem a jelentését, de szeretném megismerni
40	https://online-kerdoiv.com/index/view/hash/f505d52a49dd686dada6511e6d93f5bb/r/hz4vWea0aIFeN577gZpvU3epty4LDV6XLWzdFIjSpHnNPADhWO76mQ1yZVRnmLRjzqns6pSSlaSS6nVpJ67qmKu6aa6Qd3PPluSS3c01AEpqPMIXuf5h9CDHoEyT13eEeU3jhY01PPluSShSSePPUKSSlaSSbtWlapMp7or7JrepSUcePPluSS4nQoVS8lBcWijYfhsTU%3D	Nő	Szegedi Tudományegetem		Alapképzési (Bsc)	Gyógytornász (Bsc)		Nappali	Harmadik	Nem	Nem	Igen	Igen	Hetente	Igen	Igen	Igen	Pubmed/Medline							Nyomtatott szakkönyvek	Nem		Igen	a 3.-4. évfolyamon	Nem, az angol és magyar nyelvű forrásokat egyaránt elolvasom	Valamennyire értek hozzá (2)	Átlagos (3)	Átlagos (3)	Valamennyire értek hozzá (2)	Átlagos (3)	Átlagos (3)	Többé-kevésbé értem a jelentését	Többé-kevésbé értem a jelentését	Értem a jelentését, és másoknak is el tudnám magyarázni	Értem a jelentését, és másoknak is el tudnám magyarázni	Nem ismerem a jelentését, de szeretném megismerni	Nem ismerem a jelentését, de szeretném megismerni	Nem ismerem a jelentését, de szeretném megismerni	Többé-kevésbé értem a jelentését	Nem ismerem a jelentését, de szeretném megismerni	Nem ismerem a jelentését, de szeretném megismerni	Többé-kevésbé értem a jelentését	Többé-kevésbé értem a jelentését	Értem a jelentését, és másoknak is el tudnám magyarázni
41	https://online-kerdoiv.com/index/view/hash/f505d52a49dd686dada6511e6d93f5bb/r/FSSlaSSjhQwVt10gVGBaOIPPluSSyyMDmeFC10PPluSSQYPPluSSuG38wl5je50T2F727NErzibyM88XrOYFjA3RyPPluSSJgwu78Ml6x64CPPluSSDe0KKFBl9LAHdR5Qq5vxzEcrav4qggNBJwcxvFBiXGJeSSePPTXSXDaNppJ3Sg7pyAcxePPluSSEPmSgEhQKpwahW0oN4pGyE%3D	Nő	Szegedi Tudományegetem		Alapképzési (Bsc)	Ápoló (Bsc)		Levelezős	Negyedik	Igen	Nem	Igen	Igen	Havonta vagy ritkábban	Igen	Igen	Nem	Google							Egészségügyi szakemberek véleményének megismerése	Nem		Igen	a 3.-4. évfolyamon	Igen, csak magyarul szeretek olvasni	Átlagos (3)	Átlagos (3)	Átlagos (3)	Valamennyire értek hozzá (2)	Átlagosnál jobb (4)	Átlagosnál jobb (4)	Értem a jelentését, és másoknak is el tudnám magyarázni	Nem ismerem a jelentését, de szeretném megismerni	Értem a jelentését, és másoknak is el tudnám magyarázni	Értem a jelentését, és másoknak is el tudnám magyarázni	Értem a jelentését, és másoknak is el tudnám magyarázni	Nem ismerem a jelentését, de szeretném megismerni	Többé-kevésbé értem a jelentését	Értem a jelentését, és másoknak is el tudnám magyarázni	Értem a jelentését, és másoknak is el tudnám magyarázni	Nem ismerem a jelentését, de szeretném megismerni	Értem a jelentését, és másoknak is el tudnám magyarázni	Értem a jelentését, és másoknak is el tudnám magyarázni	Nem ismerem a jelentését, de szeretném megismerni
42	https://online-kerdoiv.com/index/view/hash/f505d52a49dd686dada6511e6d93f5bb/r/5zmVTBihVAp7zxG8g1RGOohG7TuW1P5bWb6uxpDSSlaSSg3nKCva7WzuH5wVXbdTz42vXWobGDksVzm3xPUFCP3kwpnGe66jZsqnVw5PQexhcSLLc4oj5M7n3OhvPPluSSUS6k6nFHSSePPidCWAYVraAP63BmMy1FUoytF0RqUrZPPluSSv6PXcunGPPluSSSSlaSS2A%3D	Nő	Szegedi Tudományegetem		Mesterképzési (Msc)	Ápolás (Msc)		Levelezős	Második	Igen	Nem	Igen	Igen	Naponta	Igen	Igen	Nem	Pubmed/Medline							Elektronikus folyóiratok	Igen	Igen	Igen	a 3.-4. évfolyamon	Igen, csak magyarul szeretek olvasni	Átlagos (3)	Átlagos (3)	Átlagosnál jobb (4)	Átlagos (3)	Átlagosnál jobb (4)	Átlagosnál jobb (4)	Értem a jelentését, és másoknak is el tudnám magyarázni	Többé-kevésbé értem a jelentését	Értem a jelentését, és másoknak is el tudnám magyarázni	Értem a jelentését, és másoknak is el tudnám magyarázni	Többé-kevésbé értem a jelentését	Többé-kevésbé értem a jelentését	Értem a jelentését, és másoknak is el tudnám magyarázni	Értem a jelentését, és másoknak is el tudnám magyarázni	Értem a jelentését, és másoknak is el tudnám magyarázni	Többé-kevésbé értem a jelentését	Értem a jelentését, és másoknak is el tudnám magyarázni	Értem a jelentését, és másoknak is el tudnám magyarázni	Értem a jelentését, és másoknak is el tudnám magyarázni
43	https://online-kerdoiv.com/index/view/hash/f505d52a49dd686dada6511e6d93f5bb/r/tCInxPeApcsM9ixW3mViPPluSSays8sztss4D5CTKVsJe15ZhiSSlaSSg5ykgG7elpITSSlaSShtZ9udj3mmeHJcGFajJRphO7BazyHwqk1TLivZOM8AhRcbShhmUzbR7AGATD3UwlPBcPWSSePPb50KzdlpCiPgQgSSlaSSHGvqjAEp6qvyx9QqSSlaSS3G0fSSlaSSBIOpZ0%3D	Nő	Szegedi Tudományegetem		Alapképzési (Bsc)	Egészségbiztosítási (Bsc)	egészséggondozás és prevenció - dentálhigiénikus	Nappali	Első	Nem	Nem	Igen	Nem	Soha	Igen	Igen	Nem	Wikipedia							Nyomtatott szakkönyvek	Nem		Nem		Nem, az angol és magyar nyelvű forrásokat egyaránt elolvasom	Valamennyire értek hozzá (2)	Valamennyire értek hozzá (2)	Gyenge (1)	Gyenge (1)	Gyenge (1)	Valamennyire értek hozzá (2)	Többé-kevésbé értem a jelentését	Nem ismerem a jelentését, de szeretném megismerni	Értem a jelentését, és másoknak is el tudnám magyarázni	Értem a jelentését, és másoknak is el tudnám magyarázni	Értem a jelentését, és másoknak is el tudnám magyarázni	Nem ismerem a jelentését, de szeretném megismerni	Értem a jelentését, és másoknak is el tudnám magyarázni	Értem a jelentését, és másoknak is el tudnám magyarázni	Nem ismerem a jelentését, de szeretném megismerni	Többé-kevésbé értem a jelentését	Értem a jelentését, és másoknak is el tudnám magyarázni	Értem a jelentését, és másoknak is el tudnám magyarázni	Többé-kevésbé értem a jelentését
44	https://online-kerdoiv.com/index/view/hash/f505d52a49dd686dada6511e6d93f5bb/r/DtVGs5055RJUvJvDDAXHtTaiwsrPPluSSQydcOQP3CL2c1BgvKKriUCH2mGlNMsPPluSSjonOOrXB4YpU5dQUQHjhIvMoYZp3pF4xLg16a6MiDhBV03kcDClcWEQG5sNShnwLPPluSSaAdySSePPsBRChZ4IJ19o0IjrB1DQPPluSS85NEfwJF81Q5d3FtlWOioA%3D	Nő	Debreceni Egyetem		Alapképzési (Bsc)	Ápoló (Bsc)		Levelezős	Negyedik	Igen	Nem	Nem		Havonta vagy ritkábban	Igen	Igen	Igen	Google							Oktatási jegyzetek	Igen	Igen	Igen	a 3.-4. évfolyamon	Igen, csak magyarul szeretek olvasni	Átlagos (3)	Átlagos (3)	Valamennyire értek hozzá (2)	Átlagos (3)	Átlagos (3)	Átlagosnál jobb (4)	Többé-kevésbé értem a jelentését	Többé-kevésbé értem a jelentését	Értem a jelentését, és másoknak is el tudnám magyarázni	Értem a jelentését, és másoknak is el tudnám magyarázni	Többé-kevésbé értem a jelentését	Nem ismerem a jelentését, de szeretném megismerni	Többé-kevésbé értem a jelentését	Értem a jelentését, és másoknak is el tudnám magyarázni	Nem ismerem a jelentését, de szeretném megismerni	Nem ismerem a jelentését, de szeretném megismerni	Nem ismerem a jelentését, de szeretném megismerni	Értem a jelentését, és másoknak is el tudnám magyarázni	Többé-kevésbé értem a jelentését
45	https://online-kerdoiv.com/index/view/hash/f505d52a49dd686dada6511e6d93f5bb/r/gPPluSSc6uwUSSlaSSQOoKrjF2GcjPWEx8KNOL7z3czpvohHAKU3egVdbfhaoGutEKSSlaSSqdgRZLLFslXfPPluSSna1SPPluSStClJ0txHcpCN86Y8SSlaSS8CQpVYwYIfxUOPPluSS6pzlKJRvNyYjwVdervOhVISSePPRuxN5BZGRB4R5YmUWMPPluSSSSlaSSJCbWuRfazRnXIP0ixSSlaSSIpLo0%3D	Nő	Szegedi Tudományegetem		Alapképzési (Bsc)	Védőnő (Bsc)		Nappali	Második	Nem	Nem	Igen	Igen	Havonta vagy ritkábban	Igen	Igen	Igen	Pubmed/Medline							Elektronikus szakkönyvek	Nem		Igen	a 3.-4. évfolyamon	Igen, csak magyarul szeretek olvasni	Átlagos (3)	Valamennyire értek hozzá (2)	Valamennyire értek hozzá (2)	Gyenge (1)	Valamennyire értek hozzá (2)	Átlagosnál jobb (4)	Többé-kevésbé értem a jelentését	Nem ismerem a jelentését, de szeretném megismerni	Értem a jelentését, és másoknak is el tudnám magyarázni	Értem a jelentését, és másoknak is el tudnám magyarázni	Nem ismerem a jelentését, de szeretném megismerni	Nem ismerem a jelentését, de szeretném megismerni	Többé-kevésbé értem a jelentését	Értem a jelentését, és másoknak is el tudnám magyarázni	Nem ismerem a jelentését, de szeretném megismerni	Nem ismerem a jelentését, de szeretném megismerni	Nem ismerem a jelentését, de szeretném megismerni	Értem a jelentését, és másoknak is el tudnám magyarázni	Értem a jelentését, és másoknak is el tudnám magyarázni
46	https://online-kerdoiv.com/index/view/hash/f505d52a49dd686dada6511e6d93f5bb/r/51eoXcjUPpP2qD8NeQ9fOBSrtzQTc7iSaeCvnyCfB4lT1XCsujjBT3aE0QrKU15pZc8cbLp7XHjMSSlaSSSSlaSS2gdwlpuKnPPluSSbcydOjPWfizSSlaSSaeCQvE0VcBTPPluSSSSlaSSxGlMMrEDYxSHQ1JSSePP9kPRYFLizeRQUItn2C9HqBTHSkmlgRJpu16NmnWPPluSShRs%3D	Nő	Szegedi Tudományegetem		Alapképzési (Bsc)		Dentálhigiénikus (BSC)	Nappali	Negyedik	Igen	Igen	Igen	Igen	Havonta vagy ritkábban	Igen	Igen	Nem	Google							Nyomtatott szakkönyvek	Nem		Igen	a 3.-4. évfolyamon	Igen, csak magyarul szeretek olvasni	Átlagos (3)	Átlagos (3)	Átlagos (3)	Átlagosnál jobb (4)	Átlagos (3)	Átlagosnál jobb (4)	Többé-kevésbé értem a jelentését	Nem ismerem a jelentését, de szeretném megismerni	Értem a jelentését, és másoknak is el tudnám magyarázni	Értem a jelentését, és másoknak is el tudnám magyarázni	Többé-kevésbé értem a jelentését	Többé-kevésbé értem a jelentését	Értem a jelentését, és másoknak is el tudnám magyarázni	Értem a jelentését, és másoknak is el tudnám magyarázni	Nem ismerem a jelentését, de szeretném megismerni	Nem ismerem a jelentését, de szeretném megismerni	Értem a jelentését, és másoknak is el tudnám magyarázni	Értem a jelentését, és másoknak is el tudnám magyarázni	Értem a jelentését, és másoknak is el tudnám magyarázni
47	https://online-kerdoiv.com/index/view/hash/f505d52a49dd686dada6511e6d93f5bb/r/FePtNpFWfa4rRhOQflkOSSlaSSPPluSS4iKZM1HhhJfWJvHeAyM2WJVk4PC40t2jlrPPluSSUk4SqfTSSlaSShkPPluSSF7Dc5Bt6hy9gbOH6YCW7z4xzZpSe3qJZ5oE0hd46nYqwSVxHZeD80xPPluSSxFHptSSePPhSSlaSSPPluSSCjIcswSSSlaSSjrKRldh7dkBk2jObvuI5JYYRfexqFSNA%3D	Nő	Szegedi Tudományegetem		Mesterképzési (Msc)	Ápolás (Msc)		Levelezős	Második	Igen	Nem	Igen	Nem	Hetente	Igen	Igen	Nem	Google Scholar							Elektonikus média	Igen	Igen	Igen	az 1.-2. évfolyamon	Igen, csak magyarul szeretek olvasni	Átlagosnál jobb (4)	Átlagosnál jobb (4)	Haladó szintű (5)	Átlagos (3)	Átlagos (3)	Átlagosnál jobb (4)	Értem a jelentését, és másoknak is el tudnám magyarázni	Értem a jelentését, és másoknak is el tudnám magyarázni	Értem a jelentését, és másoknak is el tudnám magyarázni	Értem a jelentését, és másoknak is el tudnám magyarázni	Többé-kevésbé értem a jelentését	Többé-kevésbé értem a jelentését	Többé-kevésbé értem a jelentését	Többé-kevésbé értem a jelentését	Többé-kevésbé értem a jelentését	Többé-kevésbé értem a jelentését	Többé-kevésbé értem a jelentését	Többé-kevésbé értem a jelentését	Többé-kevésbé értem a jelentését
48	https://online-kerdoiv.com/index/view/hash/f505d52a49dd686dada6511e6d93f5bb/r/hkkXVBcuwh7MpVy9BArMWr19z4PPluSSAv7uCIA4nFlU6SSlaSSSSlaSSHJVGlTUJUbTVL6x2zh2gDmZ3VNadOUf9DtkahOG3nfAAh0qcWJn1rrPPluSSzI4fEsRFWMqSSlaSSPgxmViBdA6wju48t5GuSSePP11T9vurKVWkWTVd4xmOE5mUVWksQrbILrbMfx1UinpE%3D	Nő	Szegedi Tudományegetem		Alapképzési (Bsc)	Védőnő (Bsc)		Nappali	Harmadik	Nem	Nem	Nem		Hetente	Igen	Igen	Igen	Google							Nyomtatott szakkönyvek	Nem		Igen	a 3.-4. évfolyamon	Igen, csak magyarul szeretek olvasni	Átlagos (3)	Átlagosnál jobb (4)	Valamennyire értek hozzá (2)	Valamennyire értek hozzá (2)	Átlagos (3)	Átlagosnál jobb (4)	Értem a jelentését, és másoknak is el tudnám magyarázni	Nem ismerem a jelentését, de szeretném megismerni	Értem a jelentését, és másoknak is el tudnám magyarázni	Értem a jelentését, és másoknak is el tudnám magyarázni	Nem ismerem a jelentését, de szeretném megismerni	Többé-kevésbé értem a jelentését	Többé-kevésbé értem a jelentését	Értem a jelentését, és másoknak is el tudnám magyarázni	Többé-kevésbé értem a jelentését	Nem ismerem a jelentését, de szeretném megismerni	Értem a jelentését, és másoknak is el tudnám magyarázni	Értem a jelentését, és másoknak is el tudnám magyarázni	Értem a jelentését, és másoknak is el tudnám magyarázni
49	https://online-kerdoiv.com/index/view/hash/f505d52a49dd686dada6511e6d93f5bb/r/vrSWSUa9Snf329w5kxHaDXMEK7i7Rp78dcekPPluSS6mKxTIygdypVPgQ5uXPfGPJP5S6dKljCtr9nk82ercGqRT9B8IWSSlaSSJPeEkzhdBEKwS4PPluSSEcjBswLwa41Av3Oig0haALsHSSePPt8JyM9IAShq1wrFXbI4pcUWlsTjkfodCbmpn4TDlP0k%3D	Nő	Debreceni Egyetem		Mesterképzési (Msc)	Egészségügyi tanár (Msc)		Levelezős	Első	Igen	Nem	Nem		Havonta vagy ritkábban	Nem	Igen	Nem	Google							Nyomtatott szakkönyvek	Nem		Nem		Igen, csak magyarul szeretek olvasni	Gyenge (1)	Gyenge (1)	Gyenge (1)	Gyenge (1)	Gyenge (1)	Valamennyire értek hozzá (2)	Nem ismerem a jelentését, de szerintem nem is hasznos számomra	Nem ismerem a jelentését, de szeretném megismerni	Többé-kevésbé értem a jelentését	Értem a jelentését, és másoknak is el tudnám magyarázni	Nem ismerem a jelentését, de szerintem nem is hasznos számomra	Nem ismerem a jelentését, de szerintem nem is hasznos számomra	Többé-kevésbé értem a jelentését	Nem ismerem a jelentését, de szeretném megismerni	Nem ismerem a jelentését, de szerintem nem is hasznos számomra	Nem ismerem a jelentését, de szerintem nem is hasznos számomra	Nem ismerem a jelentését, de szeretném megismerni	Nem ismerem a jelentését, de szeretném megismerni	Nem ismerem a jelentését, de szerintem nem is hasznos számomra
50	https://online-kerdoiv.com/index/view/hash/f505d52a49dd686dada6511e6d93f5bb/r/psO1OLohSRluhaZy6ybMYSSlaSSSxu2wPU69YoV9cq1GUl8K7PuoziuSD16mYm0JzmwHjAtQmGdRWFSSlaSSbjuoes4BHIAGEpMSSlaSSnybrP3gq1ihL58h9KQubm3k2jSvC8jEoRvQ8UMSSePP4ucY6tQ2FY9zR33lw6hzqy44t5hS8LUjSSlaSSo1kR9ZJkxI%3D	Nő	Szegedi Tudományegetem		Alapképzési (Bsc)	Ápoló (Bsc)		Nappali	Első	Nem	Nem	Nem		Soha	Igen	Igen	Nem	Wikipedia							Oktatási jegyzetek	Nem		Igen	az 1.-2. évfolyamon	Nem, az angol és magyar nyelvű forrásokat egyaránt elolvasom	Valamennyire értek hozzá (2)	Haladó szintű (5)	Átlagos (3)	Gyenge (1)	Gyenge (1)	Átlagosnál jobb (4)	Nem ismerem a jelentését, de szeretném megismerni	Nem ismerem a jelentését, de szeretném megismerni	Többé-kevésbé értem a jelentését	Többé-kevésbé értem a jelentését	Többé-kevésbé értem a jelentését	Nem ismerem a jelentését, de szeretném megismerni	Többé-kevésbé értem a jelentését	Többé-kevésbé értem a jelentését	Nem ismerem a jelentését, de szeretném megismerni	Nem ismerem a jelentését, de szeretném megismerni	Többé-kevésbé értem a jelentését	Többé-kevésbé értem a jelentését	Nem ismerem a jelentését, de szeretném megismerni
51	https://online-kerdoiv.com/index/view/hash/f505d52a49dd686dada6511e6d93f5bb/r/72cSSlaSSqkqRSSlaSSqU0U40j85qUYQlzz98vDmHSSlaSSjKriu1AYlFc7HoDmPPluSSKDTZvLGzKBdlIoOgRB8C7J6oLZPPluSSZW4nbNQRfPPluSSK0b8dvRcYf5Vq8r5GsKGnaktHKk08TH8084ZLSekPPluSS8SSePPFRVJhdHCQSSlaSS0Sg6upUyls1Jy92mGpifvuHcXWJ0hjdO0%3D	Férfi	Szegedi Tudományegetem		Alapképzési (Bsc)	Gyógytornász (Bsc)		Nappali	Második	Nem	Nem	Nem		Havonta vagy ritkábban	Igen	Igen	Igen	Pubmed/Medline							Elektronikus szakkönyvek	Nem		Igen	a 3.-4. évfolyamon	Igen, csak magyarul szeretek olvasni	Átlagos (3)	Átlagosnál jobb (4)	Valamennyire értek hozzá (2)	Valamennyire értek hozzá (2)	Átlagos (3)	Átlagosnál jobb (4)	Többé-kevésbé értem a jelentését	Többé-kevésbé értem a jelentését	Többé-kevésbé értem a jelentését	Nem ismerem a jelentését, de szeretném megismerni	Nem ismerem a jelentését, de szeretném megismerni	Nem ismerem a jelentését, de szeretném megismerni	Többé-kevésbé értem a jelentését	Értem a jelentését, és másoknak is el tudnám magyarázni	Nem ismerem a jelentését, de szeretném megismerni	Többé-kevésbé értem a jelentését	Többé-kevésbé értem a jelentését	Többé-kevésbé értem a jelentését	Többé-kevésbé értem a jelentését
52	https://online-kerdoiv.com/index/view/hash/f505d52a49dd686dada6511e6d93f5bb/r/cWplMPFx849p5Hud8KGxlzuzQWs0GMt1y5FYSPPpPPluSSSXsPPluSSPPluSSSudmjuaI8K2SSlaSSeQRyipF2PPluSSKSSlaSS50pDksagbw91OxZGNINkRsKBixgkFRdY1foGKGQb2SUFo8A06I5NwtrZZuiSSePPVqUt5vIiWwePPluSSM4Kw0JW7m9KmmOaNKsbOnzWqlwhQVnI%3D	Nő	Szegedi Tudományegetem		Alapképzési (Bsc)	Védőnő (Bsc)		Nappali	Második	Nem	Nem	Igen	Igen	Havonta vagy ritkábban	Igen	Igen	Igen	Google							Elektronikus folyóiratok	Nem		Igen	a 3.-4. évfolyamon	Igen, csak magyarul szeretek olvasni	Átlagosnál jobb (4)	Átlagosnál jobb (4)	Átlagos (3)	Valamennyire értek hozzá (2)	Valamennyire értek hozzá (2)	Átlagos (3)	Nem ismerem a jelentését, de szeretném megismerni	Nem ismerem a jelentését, de szeretném megismerni	Többé-kevésbé értem a jelentését	Értem a jelentését, és másoknak is el tudnám magyarázni	Értem a jelentését, és másoknak is el tudnám magyarázni	Nem ismerem a jelentését, de szeretném megismerni	Többé-kevésbé értem a jelentését	Értem a jelentését, és másoknak is el tudnám magyarázni	Nem ismerem a jelentését, de szeretném megismerni	Nem ismerem a jelentését, de szeretném megismerni	Nem ismerem a jelentését, de szeretném megismerni	Többé-kevésbé értem a jelentését	Nem ismerem a jelentését, de szeretném megismerni
53	https://online-kerdoiv.com/index/view/hash/f505d52a49dd686dada6511e6d93f5bb/r/PPluSSZyxuo7nYDEySo5A4aSSlaSSDMqL2PPluSS0DHBiSSSlaSSFgSUPOYRp1ISSlaSSTMOVGjCYl6GqIRJ6SSlaSSPuNgNVpkLNHN8Z9BUdJn3tSF8L7RgSSlaSSkWXUf84POJpQRqK0A77UqMjryLXvw8a6PhbMxSSePPgwdkNlPPluSS0lJ3UtbcWKgk3b7HfaRbw9jGuHtdVE1k5WjY%3D	Nő	Szegedi Tudományegetem		Alapképzési (Bsc)	Védőnő (Bsc)		Nappali	Harmadik	Nem	Nem	Igen	Igen	Havonta vagy ritkábban	Igen	Igen	Igen	Google							Szakmai irányelvek	Nem		Igen	az 1.-2. évfolyamon	Igen, csak magyarul szeretek olvasni	Valamennyire értek hozzá (2)	Valamennyire értek hozzá (2)	Gyenge (1)	Gyenge (1)	Valamennyire értek hozzá (2)	Átlagosnál jobb (4)	Nem ismerem a jelentését, de szeretném megismerni	Nem ismerem a jelentését, de szeretném megismerni	Nem ismerem a jelentését, de szeretném megismerni	Többé-kevésbé értem a jelentését	Nem ismerem a jelentését, de szeretném megismerni	Nem ismerem a jelentését, de szeretném megismerni	Nem ismerem a jelentését, de szeretném megismerni	Értem a jelentését, és másoknak is el tudnám magyarázni	Nem ismerem a jelentését, de szeretném megismerni	Nem ismerem a jelentését, de szeretném megismerni	Nem ismerem a jelentését, de szeretném megismerni	Értem a jelentését, és másoknak is el tudnám magyarázni	Értem a jelentését, és másoknak is el tudnám magyarázni
54	https://online-kerdoiv.com/index/view/hash/f505d52a49dd686dada6511e6d93f5bb/r/EceTMebMTZcw08VHfhGB6sglq29a7d5GhfZxNDwPbF3A78qionOHgsu2xQ9X7YvlscVRzToJegttHts83MpbGPPluSSNOGd8KBmK3jjRrKTQAz3IGFEv1NBSSlaSSeKUBftyruNXwfSSePPNBeANdENJRJ5nvjPPluSScd0OPPluSS4REKuvf1VJMlcLzlw61SSlaSSYA%3D	Nő	Szegedi Tudományegetem		Alapképzési (Bsc)	Gyógytornász (Bsc)		Nappali	Harmadik	Nem	Nem	Nem		Havonta vagy ritkábban	Igen	Igen	Nem	Pubmed/Medline							Elektronikus folyóiratok	Nem		Igen	az 1.-2. évfolyamon	Igen, csak magyarul szeretek olvasni	Átlagos (3)	Átlagos (3)	Átlagos (3)	Valamennyire értek hozzá (2)	Valamennyire értek hozzá (2)	Átlagosnál jobb (4)	Többé-kevésbé értem a jelentését	Többé-kevésbé értem a jelentését	Értem a jelentését, és másoknak is el tudnám magyarázni	Értem a jelentését, és másoknak is el tudnám magyarázni	Nincs véleményem ezzel kapcsolatos	Nincs véleményem ezzel kapcsolatos	Értem a jelentését, és másoknak is el tudnám magyarázni	Értem a jelentését, és másoknak is el tudnám magyarázni	Értem a jelentését, és másoknak is el tudnám magyarázni	Értem a jelentését, és másoknak is el tudnám magyarázni	Értem a jelentését, és másoknak is el tudnám magyarázni	Értem a jelentését, és másoknak is el tudnám magyarázni	Értem a jelentését, és másoknak is el tudnám magyarázni
55	https://online-kerdoiv.com/index/view/hash/f505d52a49dd686dada6511e6d93f5bb/r/kNKzQuHeTvfVKpvVoZhiJWf9WgPPluSSr4s7q2Y6cciLPSSlaSSEKaezW7tSwNHaFuhQOh89x1c2SSlaSSDCJ6vJOePamVQcT51PPluSSyPPluSSKnormedljTjUfSOAfl2gpDOQBEnSSlaSSAy6z3KuaFG08gSSePPXvPPluSSIcr9bP3rEOtPPluSSwKoibg7Gq1sd1u5SDmvNNy1UQCrA%3D	Nő	Debreceni Egyetem		Alapképzési (Bsc)	Egézségügyi ügyvitel szervező (Bsc)		Levelezős	Negyedik	Igen	Nem	Igen	Nem	Havonta vagy ritkábban	Igen	Igen	Nem	Google Scholar							Elektronikus szakkönyvek	Igen	Igen	Igen	az 1.-2. évfolyamon	Igen, csak magyarul szeretek olvasni	Átlagosnál jobb (4)	Átlagosnál jobb (4)	Átlagos (3)	Haladó (5)	Gyenge (1)	Haladó szintű (5)	Többé-kevésbé értem a jelentését	Többé-kevésbé értem a jelentését	Értem a jelentését, és másoknak is el tudnám magyarázni	Értem a jelentését, és másoknak is el tudnám magyarázni	Értem a jelentését, és másoknak is el tudnám magyarázni	Értem a jelentését, és másoknak is el tudnám magyarázni	Többé-kevésbé értem a jelentését	Értem a jelentését, és másoknak is el tudnám magyarázni	Értem a jelentését, és másoknak is el tudnám magyarázni	Nem ismerem a jelentését, de szerintem nem is hasznos számomra	Nincs véleményem ezzel kapcsolatosan	Nincs véleményem ezzel kapcsolatosan	Nincs véleményem ezzel kapcsolatosan
56	https://online-kerdoiv.com/index/view/hash/f505d52a49dd686dada6511e6d93f5bb/r/XsIPhlPPluSShD59SSlaSSmvMlb7Fsmok9J4zVlxz5gn1ujgXf10RSlwTs0rChDkIyI0FBUoGSDngkfVY17Mhb7XSSlaSSSSlaSSCMgGsgjMg47HqNksEysmnqBU1RjUkIVpqWnHkEpSq9rPPluSSm7ULSSePPaQY7nXBGM7AgE79qApuGiFQRU2f4vhNKldZVWSSlaSSWX19Y%3D	Férfi	Szegedi Tudományegetem		Alapképzési (Bsc)	Gyógytornász (Bsc)		Nappali	Harmadik	Nem	Nem	Nem		Havonta vagy ritkábban	Igen	Igen	Igen	Google							Nyomtatott szakkönyvek	Nem		Igen	a 3.-4. évfolyamon	Nem, sőt, olvastam már olyan forrást is, ami egyéb (nem angol vagy magyar) nyelven íródott	Átlagosnál jobb (4)	Haladó szintű (5)	Gyenge (1)	Valamennyire értek hozzá (2)	Átlagosnál jobb (4)	Átlagosnál jobb (4)	Többé-kevésbé értem a jelentését	Nem ismerem a jelentését, de szeretném megismerni	Nem ismerem a jelentését, de szeretném megismerni	Nem ismerem a jelentését, de szeretném megismerni	Nem ismerem a jelentését, de szeretném megismerni	Nem ismerem a jelentését, de szeretném megismerni	Nem ismerem a jelentését, de szeretném megismerni	Nem ismerem a jelentését, de szeretném megismerni	Többé-kevésbé értem a jelentését	Nem ismerem a jelentését, de szeretném megismerni	Többé-kevésbé értem a jelentését	Többé-kevésbé értem a jelentését	Többé-kevésbé értem a jelentését
57	https://online-kerdoiv.com/index/view/hash/f505d52a49dd686dada6511e6d93f5bb/r/fNiPbdXr3bAwSSlaSSpBOPPluSSaXbv42AcGZe7v6mDqSSlaSSVTYkWMESSlaSSBCTG6LhYrPPluSSAnHeGjz1yGNauWp6rBRxyJxYiKvHLBK07MdOx1KpcDuPR8ByXQEq1SSlaSS4mjgtEzyKsH32z3cEsXrSSSePPOzmedKyvgmaHPJe6MoIcBubeG3QPEl0uEWfWnLbPPluSSCsI%3D	Nő	Debreceni Egyetem		Alapképzési (Bsc)	Egézségügyi ügyvitel szervező (Bsc)		Nappali	Harmadik	Nem	Nem	Nem		Hetente	Igen	Igen	Igen	Google							Egészségügyi szakemberek véleményének megismerése	Igen	Igen	Igen	az 1.-2. évfolyamon	Nem, az angol és magyar nyelvű forrásokat egyaránt elolvasom	Átlagos (3)	Átlagosnál jobb (4)	Átlagos (3)	Valamennyire értek hozzá (2)	Átlagos (3)	Átlagosnál jobb (4)	Értem a jelentését, és másoknak is el tudnám magyarázni	Nem ismerem a jelentését, de szeretném megismerni	Értem a jelentését, és másoknak is el tudnám magyarázni	Értem a jelentését, és másoknak is el tudnám magyarázni	Többé-kevésbé értem a jelentését	Többé-kevésbé értem a jelentését	Többé-kevésbé értem a jelentését	Értem a jelentését, és másoknak is el tudnám magyarázni	Többé-kevésbé értem a jelentését	Nem ismerem a jelentését, de szeretném megismerni	Nem ismerem a jelentését, de szeretném megismerni	Értem a jelentését, és másoknak is el tudnám magyarázni	Nem ismerem a jelentését, de szeretném megismerni
58	https://online-kerdoiv.com/index/view/hash/f505d52a49dd686dada6511e6d93f5bb/r/ybeIUoRHEqJFigG16GObbglkMQT6tPPluSSThWqSSlaSSsfw1owhsjhn0lpN3xFu4LiAoUKMSSlaSSuvgobNH57cRhGB99dPsiwsYeb2zCzQF0h7pDg4h76hNxJO7y740UxKP9IJO7Z66EXSSePPmxmOq311P2RanSSlaSSrsjQTI06cZI7PZGx0Axmgb44eSSlaSSSSlaSS44%3D	Nő	Debreceni Egyetem		Mesterképzési (Msc)	Egészségügyi tanár (Msc)		Levelezős	Első	Nem	Igen	Nem		Hetente	Igen	Igen	Igen	Cochrane Library							Szakmai irányelvek	Igen	Igen	Igen	a 3.-4. évfolyamon	Nem, az angol és magyar nyelvű forrásokat egyaránt elolvasom	Haladó szintű (5)	Haladó szintű (5)	Haladó szintű (5)	Átlagosnál jobb (4)	Haladó (5)	Átlagosnál jobb (4)	Értem a jelentését, és másoknak is el tudnám magyarázni	Nem ismerem a jelentését, de szeretném megismerni	Értem a jelentését, és másoknak is el tudnám magyarázni	Értem a jelentését, és másoknak is el tudnám magyarázni	Értem a jelentését, és másoknak is el tudnám magyarázni	Értem a jelentését, és másoknak is el tudnám magyarázni	Értem a jelentését, és másoknak is el tudnám magyarázni	Értem a jelentését, és másoknak is el tudnám magyarázni	Többé-kevésbé értem a jelentését	Többé-kevésbé értem a jelentését	Értem a jelentését, és másoknak is el tudnám magyarázni	Értem a jelentését, és másoknak is el tudnám magyarázni	Értem a jelentését, és másoknak is el tudnám magyarázni
59	https://online-kerdoiv.com/index/view/hash/f505d52a49dd686dada6511e6d93f5bb/r/XAgNPPluSSyVMQBiWLNDOzqKYCVyMmX9aDgJmWtOCcErHSElvd5dIRSSlaSSZPPluSS1EKy3OhSSlaSS9PPluSSPamuY825CTGs6P8jNEhQPNnn1FJPPluSSI72WnPaLPPluSS7qDAgfiN2rUbN10QvtAjC7pG6BB1kSSePPv4GLfTEglJm1NZrkuc38AL0dLLJ2OyBRKWuQNLuSJzo%3D	Nő	Szegedi Tudományegetem		Alapképzési (Bsc)	Ápoló (Bsc)		Nappali	Első	Nem	Nem	Nem		Havonta vagy ritkábban	Igen	Igen	Igen	Wikipedia							Elektronikus szakkönyvek	Igen	Igen	Igen	a 3.-4. évfolyamon	Igen, csak magyarul szeretek olvasni	Átlagosnál jobb (4)	Átlagos (3)	Valamennyire értek hozzá (2)	Valamennyire értek hozzá (2)	Valamennyire értek hozzá (2)	Átlagos (3)	Többé-kevésbé értem a jelentését	Nem ismerem a jelentését, de szeretném megismerni	Értem a jelentését, és másoknak is el tudnám magyarázni	Értem a jelentését, és másoknak is el tudnám magyarázni	Értem a jelentését, és másoknak is el tudnám magyarázni	Értem a jelentését, és másoknak is el tudnám magyarázni	Értem a jelentését, és másoknak is el tudnám magyarázni	Értem a jelentését, és másoknak is el tudnám magyarázni	Értem a jelentését, és másoknak is el tudnám magyarázni	Nem ismerem a jelentését, de szeretném megismerni	Értem a jelentését, és másoknak is el tudnám magyarázni	Értem a jelentését, és másoknak is el tudnám magyarázni	Többé-kevésbé értem a jelentését
60	https://online-kerdoiv.com/index/view/hash/f505d52a49dd686dada6511e6d93f5bb/r/VRz7APPluSS0hPAeJSSlaSSc5IxMaWPPluSSGa4mPPluSSLwF8yOfx96wapOiaZH1XSSlaSSiV6aT3o7w80998enlf1auNCWMFHtMAKrf7xOZ1dSS2xKPPluSSKuem28fWqNoN9WiXAyiO9yUkE0lucWKSSlaSShlVGSSePPuTdd9CHbpWyxF2i5jDs4RjJOSSlaSSwtmuVWSlbPsaYrQs0U%3D	Nő	Debreceni Egyetem		Alapképzési (Bsc)	Mentőtiszt (Bsc)		Nappali	Harmadik	Nem	Nem	Nem		Havonta vagy ritkábban	Igen	Igen	Igen	Google							Nyomtatott szakkönyvek	Nem		Igen	a 3.-4. évfolyamon	Nem, az angol és magyar nyelvű forrásokat egyaránt elolvasom	Átlagosnál jobb (4)	Átlagos (3)	Valamennyire értek hozzá (2)	Gyenge (1)	Valamennyire értek hozzá (2)	Átlagos (3)	Többé-kevésbé értem a jelentését	Nem ismerem a jelentését, de szeretném megismerni	Értem a jelentését, és másoknak is el tudnám magyarázni	Értem a jelentését, és másoknak is el tudnám magyarázni	Nem ismerem a jelentését, de szeretném megismerni	Többé-kevésbé értem a jelentését	Értem a jelentését, és másoknak is el tudnám magyarázni	Értem a jelentését, és másoknak is el tudnám magyarázni	Nem ismerem a jelentését, de szeretném megismerni	Nem ismerem a jelentését, de szeretném megismerni	Értem a jelentését, és másoknak is el tudnám magyarázni	Értem a jelentését, és másoknak is el tudnám magyarázni	Többé-kevésbé értem a jelentését
61	https://online-kerdoiv.com/index/view/hash/f505d52a49dd686dada6511e6d93f5bb/r/oKlYWg6DSUQk30AhsC4KQPPluSSywKdufS0eoR8oUK8GXgw70Slzt0EUGpIwsZvk55hS6LoUTrLiHIuxJVeNoIrsVOLJ1aSOoRNp20BRt3JN1I3QPPluSSpcBOSD6rzjRnhgeJzxenSSePP12cNdptNMrRIA2jfXoBb0S6hBxG30ipqdzpM8V3DAU4%3D	Nő	Szegedi Tudományegetem		Alapképzési (Bsc)	Gyógytornász (Bsc)		Nappali	Második	Nem	Nem	Igen	Nem	Havonta vagy ritkábban	Igen	Igen	Igen	Google							Nyomtatott szakkönyvek	Nem		Nem		Nem, az angol és magyar nyelvű forrásokat egyaránt elolvasom	Átlagos (3)	Átlagos (3)	Gyenge (1)	Gyenge (1)	Valamennyire értek hozzá (2)	Valamennyire értek hozzá (2)	Nem ismerem a jelentését, de szeretném megismerni	Nem ismerem a jelentését, de szeretném megismerni	Többé-kevésbé értem a jelentését	Többé-kevésbé értem a jelentését	Nem ismerem a jelentését, de szeretném megismerni	Nincs véleményem ezzel kapcsolatos	Nem ismerem a jelentését, de szeretném megismerni	Többé-kevésbé értem a jelentését	Nem ismerem a jelentését, de szeretném megismerni	Nem ismerem a jelentését, de szeretném megismerni	Többé-kevésbé értem a jelentését	Többé-kevésbé értem a jelentését	Többé-kevésbé értem a jelentését
62	https://online-kerdoiv.com/index/view/hash/f505d52a49dd686dada6511e6d93f5bb/r/A9QVSb5cdiBSSSlaSShcM08e5qVkW2LUihtyyeFmgZUWGGSZgaQtT5OM0hUdurPPluSSuHKv81SH6aOnK24Fo56LaOdL5RcEz4s7tq0v6rkbVdMnTKv2vZlPA3WiMWUoRfK0eUz0PPluSSXSSePPb0qGDDMMH5f890weYNeddghF6WEHeIoBtRzQVcSSlaSSHEcw%3D	Nő	Szegedi Tudományegetem		Alapképzési (Bsc)	Gyógytornász (Bsc)		Nappali	Első	Nem	Nem	Igen	Nem	Soha	Igen	Igen	Nem	Wikipedia							Nyomtatott szakkönyvek	Nem		Igen	a 3.-4. évfolyamon	Nem, az angol és magyar nyelvű forrásokat egyaránt elolvasom	Átlagos (3)	Átlagos (3)	Valamennyire értek hozzá (2)	Valamennyire értek hozzá (2)	Átlagos (3)	Átlagosnál jobb (4)	Értem a jelentését, és másoknak is el tudnám magyarázni	Többé-kevésbé értem a jelentését	Értem a jelentését, és másoknak is el tudnám magyarázni	Értem a jelentését, és másoknak is el tudnám magyarázni	Többé-kevésbé értem a jelentését	Értem a jelentését, és másoknak is el tudnám magyarázni	Többé-kevésbé értem a jelentését	Értem a jelentését, és másoknak is el tudnám magyarázni	Többé-kevésbé értem a jelentését	Értem a jelentését, és másoknak is el tudnám magyarázni	Többé-kevésbé értem a jelentését	Többé-kevésbé értem a jelentését	Többé-kevésbé értem a jelentését
63	https://online-kerdoiv.com/index/view/hash/f505d52a49dd686dada6511e6d93f5bb/r/gLh8OhEhXRV0o6zQu0ABnYx8q5PPluSSG97e5Ellj2bCkrGSRkKXLV0o3OfuReOSO3YSYGd0cLaKJzCx2ARzSNQPHqmjSizGNgjM5TESCSl3ngq6Jjd4WDpOio4mOKbPPluSSYiMurSSePPq01PPluSS8gU4TQlaU7n6GogwiMcvkzbhwZwAOY9MPPGDMn8%3D	Nő	Debreceni Egyetem		Mesterképzési (Msc)	Egészségügyi tanár (Msc)		Levelezős	Első	Igen	Igen	Nem		Hetente	Igen	Igen	Igen	Google							Szakmai irányelvek	Igen	Igen	Igen	az 1.-2. évfolyamon	Igen, csak magyarul szeretek olvasni	Átlagos (3)	Átlagos (3)	Átlagos (3)	Átlagos (3)	Átlagos (3)	Átlagosnál jobb (4)	Többé-kevésbé értem a jelentését	Többé-kevésbé értem a jelentését	Értem a jelentését, és másoknak is el tudnám magyarázni	Értem a jelentését, és másoknak is el tudnám magyarázni	Nem ismerem a jelentését, de szeretném megismerni	Nem ismerem a jelentését, de szeretném megismerni	Értem a jelentését, és másoknak is el tudnám magyarázni	Értem a jelentését, és másoknak is el tudnám magyarázni	Többé-kevésbé értem a jelentését	Többé-kevésbé értem a jelentését	Többé-kevésbé értem a jelentését	Értem a jelentését, és másoknak is el tudnám magyarázni	Többé-kevésbé értem a jelentését
64	https://online-kerdoiv.com/index/view/hash/f505d52a49dd686dada6511e6d93f5bb/r/sXafuRDL8ISSlaSS01SSlaSSmpISRPPluSS1JPPluSSoPnJkeVnRDXXoPFVx58XPPPluSS7Gainal7zPPluSSZYTCshNVWk4JzavvhziRcbzJ6ZvKJ6gzxaeyr0aIWlR8HbbgjhQSSlaSSobqXXnn7DZEHxCH1WMNIYSSePP1EHCXa4ndwg3mWia5JDOpIw9HSSlaSSPPluSSSxA4wN8fb4prqPPluSSnQ%3D	Nő	Szegedi Tudományegetem		Alapképzési (Bsc)		Dentálhigiénikus (Bsc)	Nappali	Második	Nem	Nem	Nem		Havonta vagy ritkábban	Igen	Igen	Nem	Pubmed/Medline							Elektronikus folyóiratok	Nem		Igen	a 3.-4. évfolyamon	Nem, az angol és magyar nyelvű forrásokat egyaránt elolvasom	Átlagos (3)	Átlagosnál jobb (4)	Valamennyire értek hozzá (2)	Haladó (5)	Átlagos (3)	Gyenge (1)	Nem ismerem a jelentését, de szeretném megismerni	Nem ismerem a jelentését, de szeretném megismerni	Értem a jelentését, és másoknak is el tudnám magyarázni	Értem a jelentését, és másoknak is el tudnám magyarázni	Többé-kevésbé értem a jelentését	Nem ismerem a jelentését, de szeretném megismerni	Értem a jelentését, és másoknak is el tudnám magyarázni	Nem ismerem a jelentését, de szeretném megismerni	Többé-kevésbé értem a jelentését	Nem ismerem a jelentését, de szeretném megismerni	Értem a jelentését, és másoknak is el tudnám magyarázni	Többé-kevésbé értem a jelentését	Többé-kevésbé értem a jelentését
65	https://online-kerdoiv.com/index/view/hash/f505d52a49dd686dada6511e6d93f5bb/r/PxGPPluSSOV8PSSlaSSyf9s1re4iV00u7xJNsHT9UPPluSSPPluSS8pwuFs0BfDpivZwqClPPluSSnNPPluSSQfbMpCSSlaSSINvww7XPPluSSqhiuOUuGduAh7u7CZLjFM1IPvnKPPluSSJscdx3i3GQWdSSlaSSJkSSlaSSSSlaSSPPluSSnQXvl3ZmvZ9MSSePPfOAKWOkvK0rS2MvRT30S7N1tC6YjHxAuZB16pdHDyVs%3D	Nő	Szegedi Tudományegetem		Mesterképzési (Msc)	Ápolás (Msc)		Levelezős	Első	Igen	Nem	Nem		Hetente	Igen	Igen	Nem	Pubmed/Medline							Szakmai irányelvek	Nem		Igen	a 3.-4. évfolyamon	Igen, csak magyarul szeretek olvasni	Valamennyire értek hozzá (2)	Átlagos (3)	Átlagos (3)	Átlagos (3)	Átlagos (3)	Átlagosnál jobb (4)	Nem ismerem a jelentését, de szeretném megismerni	Többé-kevésbé értem a jelentését	Többé-kevésbé értem a jelentését	Többé-kevésbé értem a jelentését	Többé-kevésbé értem a jelentését	Többé-kevésbé értem a jelentését	Többé-kevésbé értem a jelentését	Többé-kevésbé értem a jelentését	Többé-kevésbé értem a jelentését	Többé-kevésbé értem a jelentését	Többé-kevésbé értem a jelentését	Többé-kevésbé értem a jelentését	Többé-kevésbé értem a jelentését
66	https://online-kerdoiv.com/index/view/hash/f505d52a49dd686dada6511e6d93f5bb/r/SSlaSSik2t27PIvLodBeYB8e3fFZ6RiPYTrMmtHnSSlaSSWST3XuwaJ3atjSSlaSSTuG39yPFmix04YqFo1ne8Qbd9T6L7zEFaRlsAE2xdVtV63DdXsDqKq0NDhiSSlaSSumxY67L0ERBJ15S1TmSSePP80MMnkBiLy42b7nrt6ilkjzOBSSlaSSSTRjYlPqa5OeuksYw%3D	Nő	Szegedi Tudományegetem		Alapképzési (Bsc)	Védőnő (Bsc)		Nappali	Első	Nem	Nem	Nem		Havonta vagy ritkábban	Igen	Igen	Igen	Google							Nyomtatott szakkönyvek	Nem		Igen	a 3.-4. évfolyamon	Igen, csak magyarul szeretek olvasni	Átlagosnál jobb (4)	Átlagosnál jobb (4)	Gyenge (1)	Gyenge (1)	Valamennyire értek hozzá (2)	Átlagosnál jobb (4)	Többé-kevésbé értem a jelentését	Nem ismerem a jelentését, de szeretném megismerni	Értem a jelentését, és másoknak is el tudnám magyarázni	Értem a jelentését, és másoknak is el tudnám magyarázni	Értem a jelentését, és másoknak is el tudnám magyarázni	Nem ismerem a jelentését, de szeretném megismerni	Értem a jelentését, és másoknak is el tudnám magyarázni	Értem a jelentését, és másoknak is el tudnám magyarázni	Értem a jelentését, és másoknak is el tudnám magyarázni	Értem a jelentését, és másoknak is el tudnám magyarázni	Értem a jelentését, és másoknak is el tudnám magyarázni	Értem a jelentését, és másoknak is el tudnám magyarázni	Értem a jelentését, és másoknak is el tudnám magyarázni
67	https://online-kerdoiv.com/index/view/hash/f505d52a49dd686dada6511e6d93f5bb/r/SWLPSIxbJzmsNrjZQpFMpb2owIRq5rpChf0tj7MEl7tBpoTESQTHbGftdE5APPluSSwyESRx9OGaEaRHn644zC8LpgSSlaSS2ChQFqPPluSSh2hksrwz69JCrUepSnO4KTNaYHVdehS5mwPPluSSSSePPj1wKppDhe0xqbPUgP3Bh7bZDpcmu9MQoPuiO6X9glmY%3D	Férfi	Szegedi Tudományegetem		Alapképzési (Bsc)	Ápoló (Bsc)		Nappali	Harmadik	Nem	Nem	Nem		Havonta vagy ritkábban	Igen	Igen	Igen	Pubmed/Medline							Elektronikus folyóiratok	Nem		Igen	az 1.-2. évfolyamon	Nem, az angol és magyar nyelvű forrásokat egyaránt elolvasom	Átlagosnál jobb (4)	Átlagosnál jobb (4)	Átlagos (3)	Valamennyire értek hozzá (2)	Átlagosnál jobb (4)	Átlagosnál jobb (4)	Többé-kevésbé értem a jelentését	Nem ismerem a jelentését, de szeretném megismerni	Értem a jelentését, és másoknak is el tudnám magyarázni	Értem a jelentését, és másoknak is el tudnám magyarázni	Többé-kevésbé értem a jelentését	Nem ismerem a jelentését, de szeretném megismerni	Többé-kevésbé értem a jelentését	Többé-kevésbé értem a jelentését	Nem ismerem a jelentését, de szeretném megismerni	Nem ismerem a jelentését, de szeretném megismerni	Értem a jelentését, és másoknak is el tudnám magyarázni	Értem a jelentését, és másoknak is el tudnám magyarázni	Többé-kevésbé értem a jelentését
68	https://online-kerdoiv.com/index/view/hash/f505d52a49dd686dada6511e6d93f5bb/r/SAEiUeKMnWnI7oz6QvpGXgjYI3ieKXBvp0j0tm7ITtKky8wbbYWk6SSlaSSS84wqtYSXPPluSSPPluSSn7EjY6nQqwd19n0tL6yHf37Xsx2gskrhp4WaDPH6vmmpcZrATVCVIh8YSRSSlaSSi79JSSePPT592gI5FiUZ7moaQZjRLpl76mrCoSSlaSSUoIxwKqEspU46U%3D	Nő	Szegedi Tudományegetem		Alapképzési (Bsc)	Védőnő (Bsc)		Nappali	Harmadik	Nem	Nem	Nem		Havonta vagy ritkábban	Igen	Igen	Nem	Pubmed/Medline							Elektronikus folyóiratok	Nem		Nem		Igen, csak magyarul szeretek olvasni	Átlagos (3)	Átlagos (3)	Gyenge (1)	Valamennyire értek hozzá (2)	Valamennyire értek hozzá (2)	Valamennyire értek hozzá (2)	Nem ismerem a jelentését, de szeretném megismerni	Nem ismerem a jelentését, de szerintem nem is hasznos számomra	Nem ismerem a jelentését, de szeretném megismerni	Értem a jelentését, és másoknak is el tudnám magyarázni	Nem ismerem a jelentését, de szerintem nem is hasznos számomra	Nincs véleményem ezzel kapcsolatos	Nincs véleményem ezzel kapcsolatos	Többé-kevésbé értem a jelentését	Többé-kevésbé értem a jelentését	Nem ismerem a jelentését, de szerintem nem is hasznos számomra	Nem ismerem a jelentését, de szerintem nem is hasznos számomra	Többé-kevésbé értem a jelentését	Többé-kevésbé értem a jelentését
69	https://online-kerdoiv.com/index/view/hash/f505d52a49dd686dada6511e6d93f5bb/r/ChJ8BvcW796asyPPluSSrjbLb4JVPPluSSSSlaSSuompi1oG2tzMPPluSSPPluSSTu8ySSlaSSuZ4BNPlmVwh8gDVG7yLYIwQGv2PPluSSgFFDnsh6MB3TQMn2Uuy0eingb5OtHBkqaPCU1f9WPPluSSamGN5uAzxoVsb2kjSSePPm1hs8l1YOS1bfbc3hiBKQolkIufKOESnLSXWD7RwE4w%3D	Nő	Szegedi Tudományegetem		Alapképzési (Bsc)	Gyógytornász (Bsc)		Nappali	Negyedik	Nem	Nem	Igen	Igen	Soha	Igen	Igen	Igen	Pubmed/Medline							Nyomtatott szakkönyvek	Nem		Igen	a 3.-4. évfolyamon	Igen, csak magyarul szeretek olvasni	Valamennyire értek hozzá (2)	Átlagos (3)	Gyenge (1)	Gyenge (1)	Valamennyire értek hozzá (2)	Átlagos (3)	Nem ismerem a jelentését, de szeretném megismerni	Nem ismerem a jelentését, de szeretném megismerni	Értem a jelentését, és másoknak is el tudnám magyarázni	Értem a jelentését, és másoknak is el tudnám magyarázni	Nem ismerem a jelentését, de szerintem nem is hasznos számomra	Nem ismerem a jelentését, de szerintem nem is hasznos számomra	Nem ismerem a jelentését, de szeretném megismerni	Többé-kevésbé értem a jelentését	Nem ismerem a jelentését, de szeretném megismerni	Többé-kevésbé értem a jelentését	Értem a jelentését, és másoknak is el tudnám magyarázni	Értem a jelentését, és másoknak is el tudnám magyarázni	Nem ismerem a jelentését, de szeretném megismerni
70	https://online-kerdoiv.com/index/view/hash/f505d52a49dd686dada6511e6d93f5bb/r/gem7UdHMVrQgtPxk5dRAY5G3ZylJZBMtUBo80t26d3p9LfQt0utZ5toylvBMM68mcrkKvVdYftSSlaSSbyOVyDxtwWrSSlaSSFP2HHE2UpCSD0FZchFGbBKGYVx1g2lxwlRp2fOSqzSSePPmTtCQPPluSSgwX1g3nxrZFM8Q9apWNnj8EK3OwuAKQ7N2280%3D	Nő	Szegedi Tudományegetem		Alapképzési (Bsc)	Gyógytornász (Bsc)		Nappali	Negyedik	Nem	Nem	Nem		Havonta vagy ritkábban	Igen	Igen	Igen	Google							Egészségügyi szakemberek véleményének megismerése	Igen	Igen	Igen	a 3.-4. évfolyamon	Igen, csak magyarul szeretek olvasni	Gyenge (1)	Valamennyire értek hozzá (2)	Gyenge (1)	Gyenge (1)	Valamennyire értek hozzá (2)	Valamennyire értek hozzá (2)	Nem ismerem a jelentését, de szeretném megismerni	Értem a jelentését, és másoknak is el tudnám magyarázni	Értem a jelentését, és másoknak is el tudnám magyarázni	Értem a jelentését, és másoknak is el tudnám magyarázni	Nem ismerem a jelentését, de szeretném megismerni	Nem ismerem a jelentését, de szerintem nem is hasznos számomra	Nem ismerem a jelentését, de szeretném megismerni	Nem ismerem a jelentését, de szerintem nem is hasznos számomra	Nem ismerem a jelentését, de szerintem nem is hasznos számomra	Nem ismerem a jelentését, de szeretném megismerni	Nem ismerem a jelentését, de szeretném megismerni	Nem ismerem a jelentését, de szerintem nem is hasznos számomra	Nem ismerem a jelentését, de szerintem nem is hasznos számomra
71	https://online-kerdoiv.com/index/view/hash/f505d52a49dd686dada6511e6d93f5bb/r/EjGkFB2tWoAHpZDnmgjbXPS0QEn8eDUzPPluSSIAjOSSlaSS1tvFiG8Yck94CLqN15LaJuSSlaSSzSanS0Pe7DJUyAjnsseYsb50C1AAB542XXUekwSSlaSSQSSlaSSg814ekDsPPluSSRSjlN2qqSSlaSSzTfGzXCXSSePPt8sayhwxKjfCPpuxsZ1bRmTfztlfL4FMwSSlaSSmaNtl6KUE%3D	Nő	Debreceni Egyetem		Alapképzési (Bsc)	Ápoló (Bsc)		Levelezős	Harmadik	Igen	Nem	Igen	Igen	Havonta vagy ritkábban	Igen	Igen	Igen	Google							Nyomtatott szakkönyvek	Nem		Igen	a 3.-4. évfolyamon	Igen, csak magyarul szeretek olvasni	Átlagos (3)	Átlagos (3)	Valamennyire értek hozzá (2)	Valamennyire értek hozzá (2)	Valamennyire értek hozzá (2)	Valamennyire értek hozzá (2)	Többé-kevésbé értem a jelentését	Többé-kevésbé értem a jelentését	Többé-kevésbé értem a jelentését	Többé-kevésbé értem a jelentését	Többé-kevésbé értem a jelentését	Többé-kevésbé értem a jelentését	Többé-kevésbé értem a jelentését	Többé-kevésbé értem a jelentését	Többé-kevésbé értem a jelentését	Többé-kevésbé értem a jelentését	Többé-kevésbé értem a jelentését	Többé-kevésbé értem a jelentését	Többé-kevésbé értem a jelentését
72	https://online-kerdoiv.com/index/view/hash/f505d52a49dd686dada6511e6d93f5bb/r/ESRZgRpueZ6orVTyGYLgiCRWIfdLw2m9F2AvdzGGt5nvPPluSSBHgRaPPluSSe8x3oUMTEI4At9aduwTqpGoE8ocgpt8WBbWFd475wktlTPPluSSxB8qIexMcs7tT9Xg8HxZuCAAKSSlaSSlJhD1SSePPCtv2KmY0Fth5n48PPluSSC410IFGHXcuS6WuUgtlI76ch3zI%3D	Nő	Szegedi Tudományegetem		Alapképzési (Bsc)	Védőnő (Bsc)		Nappali	Harmadik	Nem	Nem	Nem		Soha	Igen	Igen	Nem	Google							Elektronikus szakkönyvek	Nem		Igen	az 1.-2. évfolyamon	Igen, csak magyarul szeretek olvasni	Valamennyire értek hozzá (2)	Valamennyire értek hozzá (2)	Gyenge (1)	Gyenge (1)	Átlagos (3)	Átlagosnál jobb (4)	Többé-kevésbé értem a jelentését	Nem ismerem a jelentését, de szeretném megismerni	Többé-kevésbé értem a jelentését	Értem a jelentését, és másoknak is el tudnám magyarázni	Nem ismerem a jelentését, de szeretném megismerni	Nem ismerem a jelentését, de szeretném megismerni	Nem ismerem a jelentését, de szeretném megismerni	Többé-kevésbé értem a jelentését	Nem ismerem a jelentését, de szeretném megismerni	Nem ismerem a jelentését, de szerintem nem is hasznos számomra	Nem ismerem a jelentését, de szeretném megismerni	Értem a jelentését, és másoknak is el tudnám magyarázni	Értem a jelentését, és másoknak is el tudnám magyarázni
73	https://online-kerdoiv.com/index/view/hash/f505d52a49dd686dada6511e6d93f5bb/r/ocPDun5NQovx28El27SSlaSSWeFoBZTD5Gw3H9sNPb9tlnvlqzxgCaLkaVjd8RjSoJkPPluSST3Zwk7Awjtkwu3jYXGIaB75dQ6JE5BVmH3U2AVjTFHbkzgIpzmDbL3UjHlP2U7fsoSSePPo9O2Fd5afYqiSHk5FpXoPaDBdUnfVQUrlx6PPluSSC8wVd9s%3D	Nő	Szegedi Tudományegetem		Alapképzési (Bsc)	Gyógytornász (Bsc)		Nappali	Harmadik	Nem	Igen	Igen	Igen	Hetente	Igen	Igen	Igen	Pubmed/Medline							Oktatási jegyzetek	Nem		Igen	a 3.-4. évfolyamon	Nem, az angol és magyar nyelvű forrásokat egyaránt elolvasom	Valamennyire értek hozzá (2)	Valamennyire értek hozzá (2)	Gyenge (1)	Gyenge (1)	Valamennyire értek hozzá (2)	Valamennyire értek hozzá (2)	Többé-kevésbé értem a jelentését	Nem ismerem a jelentését, de szerintem nem is hasznos számomra	Értem a jelentését, és másoknak is el tudnám magyarázni	Értem a jelentését, és másoknak is el tudnám magyarázni	Nem ismerem a jelentését, de szeretném megismerni	Nem ismerem a jelentését, de szeretném megismerni	Többé-kevésbé értem a jelentését	Nem ismerem a jelentését, de szeretném megismerni	Többé-kevésbé értem a jelentését	Nem ismerem a jelentését, de szeretném megismerni	Értem a jelentését, és másoknak is el tudnám magyarázni	Értem a jelentését, és másoknak is el tudnám magyarázni	Értem a jelentését, és másoknak is el tudnám magyarázni
74	https://online-kerdoiv.com/index/view/hash/f505d52a49dd686dada6511e6d93f5bb/r/7o2cgWyrAitXYSSlaSS1o2ARWpShoXpuTl98jk1zaJ28wnDGPPluSSJJSSlaSS2xnNWViA58cyRmLNJNSV9XRSU8hhu88sFsoHi982SSlaSSSSlaSSVAxiGSt5p609Wok912r11D0BXHFYvVOjjIiuI7WSSePPTz1u34Iyw9VYa9icaZkgEdFm6jV2xM7rxnC2lENn3uA%3D	Nő	Szegedi Tudományegetem		Alapképzési (Bsc)	Ápoló (Bsc)		Levelezős	Második	Nem	Nem	Nem		Havonta vagy ritkábban	Igen	Igen	Igen	Medscape							Nyomtatott szakkönyvek	Nem		Igen	az 1.-2. évfolyamon	Igen, csak magyarul szeretek olvasni	Átlagos (3)	Átlagos (3)	Valamennyire értek hozzá (2)	Valamennyire értek hozzá (2)	Átlagos (3)	Átlagosnál jobb (4)	Többé-kevésbé értem a jelentését	Nem ismerem a jelentését, de szeretném megismerni	Többé-kevésbé értem a jelentését	Értem a jelentését, és másoknak is el tudnám magyarázni	Értem a jelentését, és másoknak is el tudnám magyarázni	Nem ismerem a jelentését, de szeretném megismerni	Többé-kevésbé értem a jelentését	Többé-kevésbé értem a jelentését	Többé-kevésbé értem a jelentését	Nem ismerem a jelentését, de szeretném megismerni	Nem ismerem a jelentését, de szeretném megismerni	Értem a jelentését, és másoknak is el tudnám magyarázni	Értem a jelentését, és másoknak is el tudnám magyarázni
75	https://online-kerdoiv.com/index/view/hash/f505d52a49dd686dada6511e6d93f5bb/r/4DL4qhByxBMH25oSSlaSS0pNMkXgyxKPcttd7XcSSlaSSCQ7RCpdtYgZUX5iPhT75oyPEOtDjzh9aEd8D5kXaPPluSSgxSSlaSSBFCmhWRb6E8Gyweyl5VSSlaSSu7SGaPk8G85zUZm8OIvSBPUp4YgWhSSePPPBOFObN35ge4OA2voDhnSPPluSSJFesUqtRKd1XDUaHtVe40%3D	Nő	Szegedi Tudományegetem		Alapképzési (Bsc)	Gyógytornász (Bsc)		Nappali	Második	Igen	Nem	Igen	Nem	Soha	Igen	Igen	Igen	Pubmed/Medline							Oktatási jegyzetek	Nem		Igen	a 3.-4. évfolyamon	Igen, csak magyarul szeretek olvasni	Átlagos (3)	Átlagosnál jobb (4)	Átlagos (3)	Átlagos (3)	Valamennyire értek hozzá (2)	Átlagos (3)	Többé-kevésbé értem a jelentését	Többé-kevésbé értem a jelentését	Többé-kevésbé értem a jelentését	Többé-kevésbé értem a jelentését	Nem ismerem a jelentését, de szeretném megismerni	Nem ismerem a jelentését, de szeretném megismerni	Többé-kevésbé értem a jelentését	Értem a jelentését, és másoknak is el tudnám magyarázni	Nem ismerem a jelentését, de szeretném megismerni	Többé-kevésbé értem a jelentését	Nem ismerem a jelentését, de szeretném megismerni	Többé-kevésbé értem a jelentését	Többé-kevésbé értem a jelentését
76	https://online-kerdoiv.com/index/view/hash/f505d52a49dd686dada6511e6d93f5bb/r/ebHdDOXD9G87VCZHKcnHAPxxJIPPluSSygQwOT9pHHozLPPluSS61dPPluSSUmjZx82SqhsUrQr7fG4bCss7njZ81OgjiMO4YJNklaYz2MKHxR35cRTP0IisxTUPPluSSvKquJY8v7GmuDoh5ZFoSSePPKrPA01O4crnqmCnSSlaSSzycOUcoSSlaSSITW9ySIbbleWv9hxPPluSSyI%3D	Nő	Szegedi Tudományegetem		Alapképzési (Bsc)	Gyógytornász (Bsc)		Nappali	Harmadik	Nem	Nem	Igen	Igen	Hetente	Nem	Igen	Igen	Pubmed/Medline							Elektronikus folyóiratok	Igen	Igen	Igen	a 3.-4. évfolyamon	Nem, az angol és magyar nyelvű forrásokat egyaránt elolvasom	Valamennyire értek hozzá (2)	Valamennyire értek hozzá (2)	Valamennyire értek hozzá (2)	Gyenge (1)	Gyenge (1)	Átlagos (3)	Értem a jelentését, és másoknak is el tudnám magyarázni	Nem ismerem a jelentését, de szeretném megismerni	Értem a jelentését, és másoknak is el tudnám magyarázni	Értem a jelentését, és másoknak is el tudnám magyarázni	Nem ismerem a jelentését, de szeretném megismerni	Nem ismerem a jelentését, de szeretném megismerni	Nem ismerem a jelentését, de szeretném megismerni	Nem ismerem a jelentését, de szerintem nem is hasznos számomra	Nem ismerem a jelentését, de szeretném megismerni	Nem ismerem a jelentését, de szeretném megismerni	Többé-kevésbé értem a jelentését	Többé-kevésbé értem a jelentését	Többé-kevésbé értem a jelentését
77	https://online-kerdoiv.com/index/view/hash/f505d52a49dd686dada6511e6d93f5bb/r/L8J3gVgWB5VXtBp1GFnCo4eJrRuk2Etlfx7cjkhpnrzk6SJUDEynfrbU8vMbLfvYETKFDgcvrlMcHnPQVWq6RZ2a5go8yIDmISPU0l2rbUy6XVW6FxgwwhXanOIZ4ACfSSePP3L7K5mSSlaSSrCqzOSVNmXD9JLcyR0EC0yPCgVx0F9HItVwM%3D	Nő	Szegedi Tudományegetem		Alapképzési (Bsc)	Védőnő (Bsc)		Nappali	Harmadik	Nem	Nem	Igen	Nem	Soha	Igen	Igen	Nem	Google							Nyomtatott szakkönyvek	Nem		Igen	a 3.-4. évfolyamon	Igen, csak magyarul szeretek olvasni	Átlagos (3)	Átlagos (3)	Gyenge (1)	Átlagos (3)	Valamennyire értek hozzá (2)	Átlagos (3)	Értem a jelentését, és másoknak is el tudnám magyarázni	Többé-kevésbé értem a jelentését	Értem a jelentését, és másoknak is el tudnám magyarázni	Értem a jelentését, és másoknak is el tudnám magyarázni	Értem a jelentését, és másoknak is el tudnám magyarázni	Nem ismerem a jelentését, de szeretném megismerni	Értem a jelentését, és másoknak is el tudnám magyarázni	Értem a jelentését, és másoknak is el tudnám magyarázni	Nem ismerem a jelentését, de szeretném megismerni	Értem a jelentését, és másoknak is el tudnám magyarázni	Értem a jelentését, és másoknak is el tudnám magyarázni	Értem a jelentését, és másoknak is el tudnám magyarázni	Értem a jelentését, és másoknak is el tudnám magyarázni
78	https://online-kerdoiv.com/index/view/hash/f505d52a49dd686dada6511e6d93f5bb/r/fV8RtNSgyhAWiqSU3HfvgYqblI0vvG0aWcaGbN4VK3gfla1c0PhAePYhXcv2UfPYjoa9Tu0H1TxqfK84zx9YBxWPPluSScWHMSSlaSSuxG7Z8JFK3OLEV6vnooNKIrPPluSSCSWziIGKtOfSSePPUDSSlaSSFPPluSSO8nKsSPPluSSPPluSSOOddsxHyXsu1FO3uPlWlU3JfGyFJgw%3D	Nő	Szegedi Tudományegetem		Alapképzési (Bsc)	Gyógytornász (Bsc)		Nappali	Harmadik	Nem	Nem	Igen	Nem	Havonta vagy ritkábban	Igen	Igen	Igen	Pubmed/Medline							Nyomtatott szakkönyvek	Nem		Igen	az 1.-2. évfolyamon	Nem, az angol és magyar nyelvű forrásokat egyaránt elolvasom	Átlagos (3)	Átlagos (3)	Valamennyire értek hozzá (2)	Átlagos (3)	Átlagos (3)	Átlagosnál jobb (4)	Értem a jelentését, és másoknak is el tudnám magyarázni	Nem ismerem a jelentését, de szeretném megismerni	Értem a jelentését, és másoknak is el tudnám magyarázni	Értem a jelentését, és másoknak is el tudnám magyarázni	Többé-kevésbé értem a jelentését	Nem ismerem a jelentését, de szeretném megismerni	Értem a jelentését, és másoknak is el tudnám magyarázni	Értem a jelentését, és másoknak is el tudnám magyarázni	Értem a jelentését, és másoknak is el tudnám magyarázni	Többé-kevésbé értem a jelentését	Értem a jelentését, és másoknak is el tudnám magyarázni	Értem a jelentését, és másoknak is el tudnám magyarázni	Értem a jelentését, és másoknak is el tudnám magyarázni
79	https://online-kerdoiv.com/index/view/hash/f505d52a49dd686dada6511e6d93f5bb/r/WAvYMYzUyU17IPPPluSS9lAePPluSSV6hRjWB7SnCPnPSSlaSStNcce6iQjTCAYbhKeW22GEEIle9g7rIzUqRRSSxxUNjKxmQAA1qfzOay4DtxGs6FjdwyahXAX8jLROKDPqZzSSlaSSixSSlaSSu4snPSSePPKTtQe3VnVIM6iMaoAIH5lGRITg6sszZACF3IToMF4yo%3D	Nő	Szegedi Tudományegetem		Alapképzési (Bsc)	Gyógytornász (Bsc)		Nappali	Negyedik	Nem	Nem	Nem		Havonta vagy ritkábban	Igen	Igen	Igen	Pubmed/Medline							Nyomtatott folyóiratok	Nem		Igen	a 3.-4. évfolyamon	Igen, csak magyarul szeretek olvasni	Átlagos (3)	Átlagos (3)	Valamennyire értek hozzá (2)	Valamennyire értek hozzá (2)	Valamennyire értek hozzá (2)	Átlagos (3)	Értem a jelentését, és másoknak is el tudnám magyarázni	Értem a jelentését, és másoknak is el tudnám magyarázni	Értem a jelentését, és másoknak is el tudnám magyarázni	Értem a jelentését, és másoknak is el tudnám magyarázni	Többé-kevésbé értem a jelentését	Többé-kevésbé értem a jelentését	Többé-kevésbé értem a jelentését	Többé-kevésbé értem a jelentését	Többé-kevésbé értem a jelentését	Többé-kevésbé értem a jelentését	Többé-kevésbé értem a jelentését	Többé-kevésbé értem a jelentését	Többé-kevésbé értem a jelentését
80	https://online-kerdoiv.com/index/view/hash/f505d52a49dd686dada6511e6d93f5bb/r/dgAXJxSFKKr06NcndInyzLq5LpPPluSSZAoEZvoDfBVpEXSuDVKuHPpySB6SSlaSSB9c4aGtzdGZ41YrABtMbvM7ea3NizaNqHhC7dPPluSSLW4Q9viQWCj8Tk4tQJoAA3A57K7IXafItp6SSePPoU714a1ecbnc0cEPPluSSI9bTUYe3s1r7Lk29CzJSOKqtb8E%3D	Nő	Szegedi Tudományegetem		Alapképzési (Bsc)	Védőnő (Bsc)		Nappali	Negyedik	Nem	Nem	Nem		Soha	Igen	Igen	Igen	Google Scholar							Nyomtatott szakkönyvek	Nem		Igen	a 3.-4. évfolyamon	Igen, csak magyarul szeretek olvasni	Haladó szintű (5)	Átlagosnál jobb (4)	Átlagos (3)	Átlagos (3)	Átlagosnál jobb (4)	Átlagosnál jobb (4)	Többé-kevésbé értem a jelentését	Nem ismerem a jelentését, de szeretném megismerni	Többé-kevésbé értem a jelentését	Értem a jelentését, és másoknak is el tudnám magyarázni	Többé-kevésbé értem a jelentését	Nem ismerem a jelentését, de szeretném megismerni	Többé-kevésbé értem a jelentését	Többé-kevésbé értem a jelentését	Többé-kevésbé értem a jelentését	Nem ismerem a jelentését, de szeretném megismerni	Többé-kevésbé értem a jelentését	Értem a jelentését, és másoknak is el tudnám magyarázni	Többé-kevésbé értem a jelentését
81	https://online-kerdoiv.com/index/view/hash/f505d52a49dd686dada6511e6d93f5bb/r/v0qwASiTmSeOgvPPluSSv8ZbuDSSlaSShEDnnxieCBPlyeIqYMVs6tCDDf5C3e3uhXYawl57HPPluSSfWD2fnySpiY4kmDSLNSSlaSSrOdpHk0CaiPU8A5BnmIE9iMSSlaSScInuyac0zcT3hGYrZ8cp3SSePPKlF8FtI7obMqPPluSSxDWLdOos7FwPNz96rktv71MoKNX1Cc%3D	Nő	Szegedi Tudományegetem		Alapképzési (Bsc)	Gyógytornász (Bsc)		Nappali	Első	Nem	Nem	Nem		Havonta vagy ritkábban	Igen	Igen	Igen	Google							Elektronikus szakkönyvek	Nem		Igen	a 3.-4. évfolyamon	Igen, csak magyarul szeretek olvasni	Átlagos (3)	Átlagos (3)	Valamennyire értek hozzá (2)	Gyenge (1)	Gyenge (1)	Átlagos (3)	Többé-kevésbé értem a jelentését	Nem ismerem a jelentését, de szeretném megismerni	Többé-kevésbé értem a jelentését	Értem a jelentését, és másoknak is el tudnám magyarázni	Többé-kevésbé értem a jelentését	Nem ismerem a jelentését, de szeretném megismerni	Nem ismerem a jelentését, de szeretném megismerni	Értem a jelentését, és másoknak is el tudnám magyarázni	Nem ismerem a jelentését, de szeretném megismerni	Nem ismerem a jelentését, de szeretném megismerni	Értem a jelentését, és másoknak is el tudnám magyarázni	Értem a jelentését, és másoknak is el tudnám magyarázni	Többé-kevésbé értem a jelentését
82	https://online-kerdoiv.com/index/view/hash/f505d52a49dd686dada6511e6d93f5bb/r/8rIl9J3RiUSySM8sGCeEre40f0SSlaSSnlsxBxwooWBsVSSlaSSt0ORNtZnqv0pnSSlaSSt2S6OGpn3YQZgo2axOlq9ckFcG0OWX4AjKSSlaSSkXVonAPNwKaYxNCIuu7W4LmSSlaSSIKSRrxdCXXT70uSSePPygUGyxR4i72h5IWD1NcTyrcdN4zaEDSA8bmTHq7SUBY%3D	Nő	Szegedi Tudományegetem		Alapképzési (Bsc)	Ápoló (Bsc)		Nappali	Első	Igen	Nem	Nem		Havonta vagy ritkábban	Igen	Igen	Nem	Google							Elektronikus szakkönyvek	Nem		Igen	a 3.-4. évfolyamon	Igen, csak magyarul szeretek olvasni	Átlagosnál jobb (4)	Valamennyire értek hozzá (2)	Valamennyire értek hozzá (2)	Valamennyire értek hozzá (2)	Átlagosnál jobb (4)	Átlagosnál jobb (4)	Többé-kevésbé értem a jelentését	Nem ismerem a jelentését, de szeretném megismerni	Többé-kevésbé értem a jelentését	Értem a jelentését, és másoknak is el tudnám magyarázni	Nem ismerem a jelentését, de szeretném megismerni	Nem ismerem a jelentését, de szeretném megismerni	Nem ismerem a jelentését, de szeretném megismerni	Értem a jelentését, és másoknak is el tudnám magyarázni	Nem ismerem a jelentését, de szeretném megismerni	Nem ismerem a jelentését, de szeretném megismerni	Többé-kevésbé értem a jelentését	Nem ismerem a jelentését, de szeretném megismerni	Nem ismerem a jelentését, de szeretném megismerni
83	https://online-kerdoiv.com/index/view/hash/f505d52a49dd686dada6511e6d93f5bb/r/tSyoByBfuxUXFPPluSSJBlSSSlaSShcbiezpQefLG8LKXPjY0aR3VKwneEtT1iVOFrEmylcnjoXQiDrQ7NwsOxnsLKiBjB3OSSlaSSBpV1VJJ4bVXnrPPluSSaTj95oFNRnA53Sf9nYYC3p9PPluSSxNXSSePPvzdX6uAbASSlaSSFwbmUay5cqIHG02RtjRxTMrQgcXgh6a9Q%3D	Nő	Szegedi Tudományegetem		Alapképzési (Bsc)	Ápoló (Bsc)		Nappali	Második	Nem	Nem	Igen	Igen	Soha	Igen	Igen	Nem	Google Scholar							Elektronikus folyóiratok	Igen	Igen	Igen	az 1.-2. évfolyamon	Nem, az angol és magyar nyelvű forrásokat egyaránt elolvasom	Átlagosnál jobb (4)	Átlagosnál jobb (4)	Átlagos (3)	Átlagos (3)	Átlagosnál jobb (4)	Átlagos (3)	Többé-kevésbé értem a jelentését	Nem ismerem a jelentését, de szeretném megismerni	Többé-kevésbé értem a jelentését	Értem a jelentését, és másoknak is el tudnám magyarázni	Többé-kevésbé értem a jelentését	Nem ismerem a jelentését, de szeretném megismerni	Nem ismerem a jelentését, de szeretném megismerni	Nem ismerem a jelentését, de szeretném megismerni	Nem ismerem a jelentését, de szeretném megismerni	Nem ismerem a jelentését, de szeretném megismerni	Értem a jelentését, és másoknak is el tudnám magyarázni	Értem a jelentését, és másoknak is el tudnám magyarázni	Nem ismerem a jelentését, de szeretném megismerni
84	https://online-kerdoiv.com/index/view/hash/f505d52a49dd686dada6511e6d93f5bb/r/oIPPluSSpoggaUxzJmBwYfEYOQ0aGasZgt8RBsD2vw6PjIOvRrZDQlEv0pJ8emhOPhV1YdSSlaSSo4au7UcJrGYdBSbspaWkLdPPluSSxNSSlaSSeuRxotXw2Arv8IJlyMTB6BfFmIftMYG8T6PsSSePPJX7zCSSlaSSnkxUjVNPxNP5sKXRVmX0lG7b6hMZ4bFx7Ly5M%3D	Férfi	Szegedi Tudományegetem		Alapképzési (Bsc)	Ápoló (Bsc)		Levelezős	Harmadik	Igen	Nem	Nem		Hetente	Igen	Igen	Nem	Medscape							Nyomtatott szakkönyvek	Nem		Igen	a 3.-4. évfolyamon	Nem, az angol és magyar nyelvű forrásokat egyaránt elolvasom	Átlagosnál jobb (4)	Átlagos (3)	Átlagos (3)	Átlagos (3)	Valamennyire értek hozzá (2)	Átlagosnál jobb (4)	Értem a jelentését, és másoknak is el tudnám magyarázni	Többé-kevésbé értem a jelentését	Értem a jelentését, és másoknak is el tudnám magyarázni	Értem a jelentését, és másoknak is el tudnám magyarázni	Többé-kevésbé értem a jelentését	Többé-kevésbé értem a jelentését	Értem a jelentését, és másoknak is el tudnám magyarázni	Többé-kevésbé értem a jelentését	Többé-kevésbé értem a jelentését	Értem a jelentését, és másoknak is el tudnám magyarázni	Értem a jelentését, és másoknak is el tudnám magyarázni	Értem a jelentését, és másoknak is el tudnám magyarázni	Értem a jelentését, és másoknak is el tudnám magyarázni
85	https://online-kerdoiv.com/index/view/hash/f505d52a49dd686dada6511e6d93f5bb/r/0V6q2yySSlaSSNezn9UQrxZR23VttueavSSlaSSXJopZNASSlaSSsu20HRSSlaSSLJGPm8sKePMSmyyx7nvZ4FbiPPluSSpuajlawjtxrP1gPPluSSjtt0ePbBLlPPluSSyarxo8F0fkPEtvb5JWPPluSSbbWqsJ31l7bUqpSSePPU1sXHIPPluSSUjE93S64SSlaSS6ZP9Dn4du4uIB60U3LaVWWz5IZQ%3D	Nő	Szegedi Tudományegetem		Alapképzési (Bsc)	Szociális munka (BA)		Nappali	Harmadik	Nem	Nem	Igen	Nem	Hetente	Igen	Igen	Igen	Google							Nyomtatott szakkönyvek	Nem		Igen	az 1.-2. évfolyamon	Nem, az angol és magyar nyelvű forrásokat egyaránt elolvasom	Átlagos (3)	Átlagos (3)	Valamennyire értek hozzá (2)	Gyenge (1)	Átlagos (3)	Átlagos (3)	Nem ismerem a jelentését, de szeretném megismerni	Nem ismerem a jelentését, de szeretném megismerni	Értem a jelentését, és másoknak is el tudnám magyarázni	Értem a jelentését, és másoknak is el tudnám magyarázni	Nem ismerem a jelentését, de szeretném megismerni	Nem ismerem a jelentését, de szeretném megismerni	Többé-kevésbé értem a jelentését	Értem a jelentését, és másoknak is el tudnám magyarázni	Értem a jelentését, és másoknak is el tudnám magyarázni	Értem a jelentését, és másoknak is el tudnám magyarázni	Értem a jelentését, és másoknak is el tudnám magyarázni	Értem a jelentését, és másoknak is el tudnám magyarázni	Értem a jelentését, és másoknak is el tudnám magyarázni
86	https://online-kerdoiv.com/index/view/hash/f505d52a49dd686dada6511e6d93f5bb/r/qaJZgUSgESSlaSSU0VVwPeTPPluSSQ9c03aaeDi7bETeSSlaSSGBOq91HCesc8uxpiFPVIRjSSlaSS2aTbqduVmi1WDHX9n5td3E9ymZupwpy9NIPPluSSiJ87qwugm8gjtOuPnqNZPTuIKL01TsSSlaSSLEzFSSePPxuZ8CRTKoknPEsTKMcPPluSSgedGfclen7rvCGmczT30ce3I%3D	Nő	Szegedi Tudományegetem		Alapképzési (Bsc)	Ápoló (Bsc)		Nappali	Harmadik	Nem	Nem	Nem		Havonta vagy ritkábban	Igen	Igen	Nem	Google Scholar							Elektronikus folyóiratok	Nem		Igen	a 3.-4. évfolyamon	Nem, az angol és magyar nyelvű forrásokat egyaránt elolvasom	Átlagosnál jobb (4)	Haladó szintű (5)	Átlagos (3)	Valamennyire értek hozzá (2)	Átlagosnál jobb (4)	Átlagos (3)	Többé-kevésbé értem a jelentését	Nem ismerem a jelentését, de szeretném megismerni	Értem a jelentését, és másoknak is el tudnám magyarázni	Értem a jelentését, és másoknak is el tudnám magyarázni	Többé-kevésbé értem a jelentését	Nem ismerem a jelentését, de szeretném megismerni	Nem ismerem a jelentését, de szeretném megismerni	Értem a jelentését, és másoknak is el tudnám magyarázni	Többé-kevésbé értem a jelentését	Többé-kevésbé értem a jelentését	Értem a jelentését, és másoknak is el tudnám magyarázni	Értem a jelentését, és másoknak is el tudnám magyarázni	Értem a jelentését, és másoknak is el tudnám magyarázni
87	https://online-kerdoiv.com/index/view/hash/f505d52a49dd686dada6511e6d93f5bb/r/V871VBUnx09uv8tojx2zCz0G6HShFoPPluSS8ZRm3wNcVJK3yWZGPPluSSrQX7Fvj7OCMb0rPnhfRZmABZGRKRBWeXv9Gm71rT76SSlaSSVnifFYuxgrUcJjIWsFZ9OPPluSSdNLVYgpt75oWc7rSSePPc4HYHz4A8WQIsdjtZtMjjEK1LS1PDHtVvCNusSPfNPPluSSM%3D	Nő	Szegedi Tudományegetem		Alapképzési (Bsc)	Ápoló (Bsc)		Levelezős	Negyedik	Nem	Nem	Igen	Nem	Hetente	Igen	Igen	Igen	Pubmed/Medline							Elektronikus szakkönyvek	Igen	Igen	Igen	a 3.-4. évfolyamon	Nem, sőt, olvastam már olyan forrást is, ami egyéb (nem angol vagy magyar) nyelven íródott	Átlagos (3)	Átlagos (3)	Átlagos (3)	Valamennyire értek hozzá (2)	Átlagos (3)	Átlagosnál jobb (4)	Értem a jelentését, és másoknak is el tudnám magyarázni	Többé-kevésbé értem a jelentését	Értem a jelentését, és másoknak is el tudnám magyarázni	Értem a jelentését, és másoknak is el tudnám magyarázni	Értem a jelentését, és másoknak is el tudnám magyarázni	Értem a jelentését, és másoknak is el tudnám magyarázni	Értem a jelentését, és másoknak is el tudnám magyarázni	Értem a jelentését, és másoknak is el tudnám magyarázni	Értem a jelentését, és másoknak is el tudnám magyarázni	Értem a jelentését, és másoknak is el tudnám magyarázni	Értem a jelentését, és másoknak is el tudnám magyarázni	Értem a jelentését, és másoknak is el tudnám magyarázni	Értem a jelentését, és másoknak is el tudnám magyarázni
88	https://online-kerdoiv.com/index/view/hash/f505d52a49dd686dada6511e6d93f5bb/r/2gKHUYkiI9UPE0jEdbzXYvc28xcr5NDUbaNf4gQNuPntD0dn4Zz7uD7gnHJO8Yqi2GulsUM9BzJzJ5FpErBdkpr0GRtvOxnbFE5nR1dqCQjSTg7RAJ61DiWgDnYeSYBXSSePPbOLzSbQwPqh2DcXe1ZJoErnuDiOaBv7TknlKj0k8xUo%3D	Nő	Szegedi Tudományegetem		Alapképzési (Bsc)	Gyógytornász (Bsc)		Nappali	Negyedik	Nem	Nem	Nem		Havonta vagy ritkábban	Igen	Igen	Nem	Pubmed/Medline							Nyomtatott szakkönyvek	Nem	Igen	Igen	a 3.-4. évfolyamon	Nem, az angol és magyar nyelvű forrásokat egyaránt elolvasom	Átlagos (3)	Átlagosnál jobb (4)	Átlagos (3)	Gyenge (1)	Valamennyire értek hozzá (2)	Átlagosnál jobb (4)	Többé-kevésbé értem a jelentését	Nem ismerem a jelentését, de szeretném megismerni	Értem a jelentését, és másoknak is el tudnám magyarázni	Értem a jelentését, és másoknak is el tudnám magyarázni	Nem ismerem a jelentését, de szeretném megismerni	Nem ismerem a jelentését, de szeretném megismerni	Többé-kevésbé értem a jelentését	Értem a jelentését, és másoknak is el tudnám magyarázni	Nem ismerem a jelentését, de szeretném megismerni	Többé-kevésbé értem a jelentését	Értem a jelentését, és másoknak is el tudnám magyarázni	Értem a jelentését, és másoknak is el tudnám magyarázni	Értem a jelentését, és másoknak is el tudnám magyarázni
89	https://online-kerdoiv.com/index/view/hash/f505d52a49dd686dada6511e6d93f5bb/r/NAFNbxTysYWDCPY1ogg6bEIcSSlaSSQ0QXVSddpE3lSd1tCVsJAUAdjsPOuySSlaSSgbTuIWMKhA9FbTS36Jxl8wezm5WAAnei8MkULLfPJmGcnayAnqlshnqaJXdwnYBZ36lgDZylSSePP5HSJmwgGP4C1qLb6MoqMUPjfZvYNTPPluSSP1dFZ8ZiawA5o%3D	Férfi	Szegedi Tudományegetem		Alapképzési (Bsc)	Gyógytornász (Bsc)		Nappali	Harmadik	Nem	Nem	Nem		Havonta vagy ritkábban	Igen	Igen	Nem	Pubmed/Medline							Elektronikus folyóiratok	Nem		Nem		Igen, csak angolul szeretek olvasni	Haladó szintű (5)	Haladó szintű (5)	Haladó szintű (5)	Valamennyire értek hozzá (2)	Haladó (5)	Átlagos (3)	Értem a jelentését, és másoknak is el tudnám magyarázni	Értem a jelentését, és másoknak is el tudnám magyarázni	Értem a jelentését, és másoknak is el tudnám magyarázni	Értem a jelentését, és másoknak is el tudnám magyarázni	Értem a jelentését, és másoknak is el tudnám magyarázni	Értem a jelentését, és másoknak is el tudnám magyarázni	Értem a jelentését, és másoknak is el tudnám magyarázni	Többé-kevésbé értem a jelentését	Értem a jelentését, és másoknak is el tudnám magyarázni	Többé-kevésbé értem a jelentését	Értem a jelentését, és másoknak is el tudnám magyarázni	Értem a jelentését, és másoknak is el tudnám magyarázni	Értem a jelentését, és másoknak is el tudnám magyarázni
90	https://online-kerdoiv.com/index/view/hash/f505d52a49dd686dada6511e6d93f5bb/r/37krXPLtvDIpEEFdewpKLfJQlh1i5sutSSlaSSsJwSSSlaSSESSlaSSJJBvTBlKmTltSqLq1SYiKRW9mP23GVrGyYeQk5rJl70mNnzSSlaSSb7FwG5BkvRhvQVwfxEMnTp5k6DPsNW1cEz8XqGsCSSePPcCsq9O8Al3qUYGoG1LqBirAWUUJI35HLuk2UmfMmf9U%3D	Nő	Debreceni Egyetem		Alapképzési (Bsc)	Védőnő (Bsc)		Nappali	Negyedik	Igen	Nem	Igen	Igen	Hetente	Igen	Igen	Igen	Wikipedia							Szakmai irányelvek	Igen	Igen	Igen	a 3.-4. évfolyamon	Igen, csak magyarul szeretek olvasni	Átlagos (3)	Valamennyire értek hozzá (2)	Valamennyire értek hozzá (2)	Valamennyire értek hozzá (2)	Valamennyire értek hozzá (2)	Átlagos (3)	Értem a jelentését, és másoknak is el tudnám magyarázni	Nem ismerem a jelentését, de szeretném megismerni	Értem a jelentését, és másoknak is el tudnám magyarázni	Értem a jelentését, és másoknak is el tudnám magyarázni	Többé-kevésbé értem a jelentését	Nem ismerem a jelentését, de szeretném megismerni	Többé-kevésbé értem a jelentését	Többé-kevésbé értem a jelentését	Többé-kevésbé értem a jelentését	Nem ismerem a jelentését, de szeretném megismerni	Többé-kevésbé értem a jelentését	Értem a jelentését, és másoknak is el tudnám magyarázni	Többé-kevésbé értem a jelentését
91	https://online-kerdoiv.com/index/view/hash/f505d52a49dd686dada6511e6d93f5bb/r/nblMBOFJX07ffgWr8anaoOYBKK8Zc0XrFqrCJYUBUIEqI66mUSFxHoi6wu47JPo0XOON0A9ymvLugXxMXNB3kbgKOaia6AjwHo7VfTbpZXPPluSSe8kP7GAxAx2RxtyjLSSSlaSSPZSSePPdPPluSS0CI5RSMAGtaHuytdwewzFnOh40HSSlaSSrMF7FsjrVzjwQ%3D	Nő	Szegedi Tudományegetem		Alapképzési (Bsc)	Ápoló (Bsc)		Nappali	Második	Nem	Nem	Nem		Soha	Igen	Igen	Igen	Google Scholar							Nyomtatott folyóiratok	Nem		Igen	a 3.-4. évfolyamon	Igen, csak magyarul szeretek olvasni	Átlagos (3)	Átlagosnál jobb (4)	Átlagos (3)	Valamennyire értek hozzá (2)	Gyenge (1)	Átlagosnál jobb (4)	Nem ismerem a jelentését, de szeretném megismerni	Nem ismerem a jelentését, de szeretném megismerni	Értem a jelentését, és másoknak is el tudnám magyarázni	Értem a jelentését, és másoknak is el tudnám magyarázni	Többé-kevésbé értem a jelentését	Nincs véleményem ezzel kapcsolatos	Többé-kevésbé értem a jelentését	Nem ismerem a jelentését, de szeretném megismerni	Nincs véleményem ezzel kapcsolatosan	Nincs véleményem ezzel kapcsolatosan	Értem a jelentését, és másoknak is el tudnám magyarázni	Értem a jelentését, és másoknak is el tudnám magyarázni	Nincs véleményem ezzel kapcsolatosan
92	https://online-kerdoiv.com/index/view/hash/f505d52a49dd686dada6511e6d93f5bb/r/BivokrNEdOmJvMGleWPp4FxVaRWnWN0nR6xrUcc2ohfKC9CPPluSSkJhqlPPluSSZPPPluSSTRh7F0TxWR8nZFdPSecfxU05OVArIOnRY4RsVHfnJ60j69rDmktcyXhJJPkVznIpIsWufKXSSePPM1qbWRKwHVRhOhrSSlaSSrBcqVrSSlaSSGHVkxgv3thNaQic7stjw%3D	Nő	Debreceni Egyetem		Alapképzési (Bsc)	Ápoló (Bsc)		Levelezős	Első	Igen	Nem	Igen	Igen	Hetente	Igen	Igen	Igen	Google Scholar							Nyomtatott szakkönyvek	Igen	Igen	Igen	az 1.-2. évfolyamon	Igen, csak magyarul szeretek olvasni	Átlagosnál jobb (4)	Átlagosnál jobb (4)	Átlagosnál jobb (4)	Átlagosnál jobb (4)	Átlagosnál jobb (4)	Haladó szintű (5)	Többé-kevésbé értem a jelentését	Többé-kevésbé értem a jelentését	Többé-kevésbé értem a jelentését	Többé-kevésbé értem a jelentését	Többé-kevésbé értem a jelentését	Többé-kevésbé értem a jelentését	Többé-kevésbé értem a jelentését	Többé-kevésbé értem a jelentését	Többé-kevésbé értem a jelentését	Többé-kevésbé értem a jelentését	Többé-kevésbé értem a jelentését	Többé-kevésbé értem a jelentését	Többé-kevésbé értem a jelentését
93	https://online-kerdoiv.com/index/view/hash/f505d52a49dd686dada6511e6d93f5bb/r/0QESSlaSSftd3VFLImFYJIKqqBkPYjneM1dAZn3ve3iIbVhUvkq3spumSJXmDA41CERpEmQefSSlaSSV6V1XzAyeHOwYix8MFb4cpAmSNZ7vsNLuOOvM9UCBSijJoh2p2TSSlaSSJnGHqyJSSePPogPPluSScZSU6nS9AhPS0TPbtQGWuJZcOO9FsGPPluSScjsoQtZ8o%3D	Nő	Debreceni Egyetem		Alapképzési (Bsc)	Egészségturizmus szervező (Bsc)		Nappali	Első	Nem	Nem	Nem		Havonta vagy ritkábban	Igen	Igen	Nem	Google							Oktatási jegyzetek	Nem		Igen	a 3.-4. évfolyamon	Igen, csak magyarul szeretek olvasni	Átlagos (3)	Valamennyire értek hozzá (2)	Valamennyire értek hozzá (2)	Valamennyire értek hozzá (2)	Valamennyire értek hozzá (2)	Valamennyire értek hozzá (2)	Többé-kevésbé értem a jelentését	Többé-kevésbé értem a jelentését	Többé-kevésbé értem a jelentését	Többé-kevésbé értem a jelentését	Nem ismerem a jelentését, de szeretném megismerni	Nem ismerem a jelentését, de szeretném megismerni	Többé-kevésbé értem a jelentését	Értem a jelentését, és másoknak is el tudnám magyarázni	Többé-kevésbé értem a jelentését	Többé-kevésbé értem a jelentését	Értem a jelentését, és másoknak is el tudnám magyarázni	Értem a jelentését, és másoknak is el tudnám magyarázni	Többé-kevésbé értem a jelentését
94	https://online-kerdoiv.com/index/view/hash/f505d52a49dd686dada6511e6d93f5bb/r/UowUxXXlqYmN091G2CUoUFgwLPPluSSF374rSHxSSlaSS7yWUJAPPluSSDlZPPluSSJAL1NleoJwUj7f4Eb5RmSZ2HVOxpzlbfYKAW1SYBLKO6fTCBImE9H4mCItmKac851BUYcCszzHoRjAwrYzSSePPRbBYl2sqdjiLaGD5KZU4H8X07F5qc3OXF5hqLnLWuLk%3D	Nő	Miskolci Egyetem		Alapképzési (Bsc)	Egészségturizmus szervező (Bsc)		Levelezős	Első	Nem	Nem	Igen	Igen	Hetente	Igen	Igen	Nem	Google							Egészségügyi szakemberek véleményének megismerése	Nem		Igen	az 1.-2. évfolyamon	Igen, csak magyarul szeretek olvasni	Átlagos (3)	Átlagos (3)	Gyenge (1)	Gyenge (1)	Gyenge (1)	Átlagos (3)	Nem ismerem a jelentését, de szeretném megismerni	Nem ismerem a jelentését, de szeretném megismerni	Többé-kevésbé értem a jelentését	Többé-kevésbé értem a jelentését	Nem ismerem a jelentését, de szeretném megismerni	Nem ismerem a jelentését, de szeretném megismerni	Nem ismerem a jelentését, de szeretném megismerni	Nem ismerem a jelentését, de szeretném megismerni	Nem ismerem a jelentését, de szeretném megismerni	Nem ismerem a jelentését, de szeretném megismerni	Nem ismerem a jelentését, de szeretném megismerni	Többé-kevésbé értem a jelentését	Többé-kevésbé értem a jelentését
95	https://online-kerdoiv.com/index/view/hash/f505d52a49dd686dada6511e6d93f5bb/r/KH2u1xCzqLCPPluSSg6cCLgb7Bl7KlSov8dPPPluSSU8X9Js2tYjtGMCB71cquwEJQe6TMKnLFkgfiX0tiakhk16kV8ZZX4LOpGHrWxfipWjHL4C3g5XwSSlaSSeU3Xzb5q97vQEZJxYQlGSSePPGJKHrC7WVwNoJoU0Bw7eyFfHHZGK7qSSlaSSUoMGYFFzImsY%3D	Nő	Miskolci Egyetem		Alapképzési (Bsc)	Gyógytornász (Bsc)		Nappali	Második	Nem	Nem	Nem		Hetente	Igen	Igen	Igen	Wikipedia							Nyomtatott szakkönyvek	Igen	Igen	Igen	a 3.-4. évfolyamon	Nem, az angol és magyar nyelvű forrásokat egyaránt elolvasom	Haladó szintű (5)	Haladó szintű (5)	Átlagos (3)	Valamennyire értek hozzá (2)	Átlagosnál jobb (4)	Átlagosnál jobb (4)	Nem ismerem a jelentését, de szeretném megismerni	Nem ismerem a jelentését, de szeretném megismerni	Többé-kevésbé értem a jelentését	Többé-kevésbé értem a jelentését	Többé-kevésbé értem a jelentését	Többé-kevésbé értem a jelentését	Többé-kevésbé értem a jelentését	Értem a jelentését, és másoknak is el tudnám magyarázni	Többé-kevésbé értem a jelentését	Nem ismerem a jelentését, de szeretném megismerni	Nem ismerem a jelentését, de szeretném megismerni	Többé-kevésbé értem a jelentését	Nem ismerem a jelentését, de szeretném megismerni
96	https://online-kerdoiv.com/index/view/hash/f505d52a49dd686dada6511e6d93f5bb/r/78tpiNrjCldDnPbs79sCBrWynhbXH2GW6GIJI68yUTuAnxbpw4rHBPDrKAlZQxNTs9CbGAkCuyxJZXJJnUE5PPluSSCgqUOfRsxqa1FpD8YGMonXYSTewzImfboPbBaBvwBM4SSePP9mXUnTgFBO2YqmIPqILVqPHGhp5nSPPluSSQdUJn6Ine5Abs%3D	Nő	Miskolci Egyetem		Alapképzési (Bsc)	Gyógytornász (Bsc)		Nappali	Első	Nem	Nem	Nem		Havonta vagy ritkábban	Igen	Igen	Igen	Cochrane Library							Nyomtatott szakkönyvek	Igen	Igen	Igen	az 1.-2. évfolyamon	Igen, csak magyarul szeretek olvasni	Átlagosnál jobb (4)	Haladó szintű (5)	Átlagos (3)	Átlagosnál jobb (4)	Átlagosnál jobb (4)	Haladó szintű (5)	Értem a jelentését, és másoknak is el tudnám magyarázni	Értem a jelentését, és másoknak is el tudnám magyarázni	Nem ismerem a jelentését, de szerintem nem is hasznos számomra	Nem ismerem a jelentését, de szerintem nem is hasznos számomra	Többé-kevésbé értem a jelentését	Értem a jelentését, és másoknak is el tudnám magyarázni	Értem a jelentését, és másoknak is el tudnám magyarázni	Nem ismerem a jelentését, de szerintem nem is hasznos számomra	Értem a jelentését, és másoknak is el tudnám magyarázni	Nem ismerem a jelentését, de szerintem nem is hasznos számomra	Nem ismerem a jelentését, de szerintem nem is hasznos számomra	Értem a jelentését, és másoknak is el tudnám magyarázni	Nem ismerem a jelentését, de szerintem nem is hasznos számomra
97	https://online-kerdoiv.com/index/view/hash/f505d52a49dd686dada6511e6d93f5bb/r/Op7GMA184DzCVS2Hn4tGP9XSDAVHTTQin9eJSSlaSS3LzSSlaSSaKRkt7uCftU0yyHRfs3nE1K18tpnqRnkkecKzGkb5QZ8PPluSS2BgC7XkFLgG6vrQXeJmFQ5uXQAxkKfq0yeKFWvBY3BSSePPTOi4CaECbPPluSSvgHjgOZczNhzzZjQ4wfH4tuykKJXHQk7I%3D	Nő	Miskolci Egyetem		Alapképzési (Bsc)	Gyógytornász (Bsc)		Nappali	Első	Nem	Nem	Nem		Havonta vagy ritkábban	Igen	Igen	Nem	Google							Oktatási jegyzetek	Nem		Igen	a 3.-4. évfolyamon	Nem, az angol és magyar nyelvű forrásokat egyaránt elolvasom	Átlagos (3)	Átlagos (3)	Átlagosnál jobb (4)	Átlagos (3)	Átlagos (3)	Átlagosnál jobb (4)	Többé-kevésbé értem a jelentését	Nem ismerem a jelentését, de szerintem nem is hasznos számomra	Nem ismerem a jelentését, de szerintem nem is hasznos számomra	Nem ismerem a jelentését, de szeretném megismerni	Többé-kevésbé értem a jelentését	Nem ismerem a jelentését, de szeretném megismerni	Többé-kevésbé értem a jelentését	Nem ismerem a jelentését, de szerintem nem is hasznos számomra	Nem ismerem a jelentését, de szerintem nem is hasznos számomra	Nem ismerem a jelentését, de szeretném megismerni	Nem ismerem a jelentését, de szeretném megismerni	Nem ismerem a jelentését, de szerintem nem is hasznos számomra	Nem ismerem a jelentését, de szerintem nem is hasznos számomra
98	https://online-kerdoiv.com/index/view/hash/f505d52a49dd686dada6511e6d93f5bb/r/SSlaSSNbSSlaSSdiyK9aSSlaSSUPPluSSu56VMo1B6oFKnocJZ4Qb3OVcEOrg8I5lGE87PphdoNVIniWMA0PPluSSkdQSgQnHYol3c8cUPbOWfqCLovnCwaebAeKXPPluSSPPluSS7bhj1h9JSSlaSSWsJ5CtTFz5rGEsyZBSSePPPMbguf3GnTPPluSSjCzkXrxA7v7Re6IS1vKK4J2OyGemkrwY%3D	Nő	Miskolci Egyetem		Alapképzési (Bsc)	Gyógytornász (Bsc)		Nappali	Második	Nem	Nem	Nem		Havonta vagy ritkábban	Igen	Igen	Nem	Wikipedia							Nyomtatott szakkönyvek	Nem		Igen	a 3.-4. évfolyamon	Igen, csak magyarul szeretek olvasni	Valamennyire értek hozzá (2)	Átlagos (3)	Gyenge (1)	Gyenge (1)	Átlagos (3)	Átlagos (3)	Többé-kevésbé értem a jelentését	Nem ismerem a jelentését, de szeretném megismerni	Nem ismerem a jelentését, de szeretném megismerni	Nem ismerem a jelentését, de szeretném megismerni	Többé-kevésbé értem a jelentését	Nem ismerem a jelentését, de szeretném megismerni	Nem ismerem a jelentését, de szeretném megismerni	Nincs véleményem ezzel kapcsolatosan	Nincs véleményem ezzel kapcsolatosan	Nincs véleményem ezzel kapcsolatosan	Nem ismerem a jelentését, de szeretném megismerni	Többé-kevésbé értem a jelentését	Többé-kevésbé értem a jelentését
99	https://online-kerdoiv.com/index/view/hash/f505d52a49dd686dada6511e6d93f5bb/r/8IUJrnewjZvKJ2exUCcSSlaSSHSSlaSSrdA8xqO5VRowqPgDHDwHep3fnPPluSShxIdOVF21nZAb6C0B2ac4uJsqC5FT4oWhALm9auPPluSSpkuVUHgNxr1GPMj6vINckmIS1H4sxsYsopBk7bvMSSePPD4ZGs43dYSSlaSSTaQfJpXo8VhLeiB1MqbFmgcULcUZkquD0%3D	Nő	Miskolci Egyetem		Alapképzési (Bsc)	Gyógytornász (Bsc)		Nappali	Második	Nem	Nem	Nem		Havonta vagy ritkábban	Igen	Igen	Nem	Google Scholar							Elektronikus folyóiratok	Nem		Igen	a 3.-4. évfolyamon	Igen, csak magyarul szeretek olvasni	Átlagos (3)	Gyenge (1)	Gyenge (1)	Gyenge (1)	Gyenge (1)	Valamennyire értek hozzá (2)	Többé-kevésbé értem a jelentését	Nem ismerem a jelentését, de szeretném megismerni	Nem ismerem a jelentését, de szeretném megismerni	Többé-kevésbé értem a jelentését	Nem ismerem a jelentését, de szeretném megismerni	Nem ismerem a jelentését, de szeretném megismerni	Többé-kevésbé értem a jelentését	Többé-kevésbé értem a jelentését	Nem ismerem a jelentését, de szeretném megismerni	Nem ismerem a jelentését, de szeretném megismerni	Többé-kevésbé értem a jelentését	Többé-kevésbé értem a jelentését	Többé-kevésbé értem a jelentését
100	https://online-kerdoiv.com/index/view/hash/f505d52a49dd686dada6511e6d93f5bb/r/5Ez7s9mZSSlaSSUgtOb7qw76xHQBlNt4wPPluSSZgctxMElBjyCOE5j9pHXrCPPluSSsaT07iMmNro3RuVfbT2Uxakc77XwCvCR1vGOmCVZHlhaPPluSSAeqxhCRylqYGo3kwiicOrUuG6gLiEZTSSePPb3O8tLtIbVYfOSAsdLx4z98p5GPPluSSJeezNSSlaSSQVaO4foKD0%3D	Nő	Miskolci Egyetem		Alapképzési (Bsc)	Egészségturizmus szervező (Bsc)		Nappali	Első	Nem	Nem	Igen	Igen	Havonta vagy ritkábban	Igen	Igen	Nem	Google							Egészségügyi szakemberek véleményének megismerése	Nem		Igen	a 3.-4. évfolyamon	Igen, csak magyarul szeretek olvasni	Átlagos (3)	Haladó szintű (5)	Átlagos (3)	Átlagos (3)	Átlagos (3)	Átlagosnál jobb (4)	Nem ismerem a jelentését, de szeretném megismerni	Nem ismerem a jelentését, de szeretném megismerni	Értem a jelentését, és másoknak is el tudnám magyarázni	Értem a jelentését, és másoknak is el tudnám magyarázni	Értem a jelentését, és másoknak is el tudnám magyarázni	Nem ismerem a jelentését, de szeretném megismerni	Többé-kevésbé értem a jelentését	Többé-kevésbé értem a jelentését	Értem a jelentését, és másoknak is el tudnám magyarázni	Nem ismerem a jelentését, de szeretném megismerni	Többé-kevésbé értem a jelentését	Értem a jelentését, és másoknak is el tudnám magyarázni	Többé-kevésbé értem a jelentését
101	https://online-kerdoiv.com/index/view/hash/f505d52a49dd686dada6511e6d93f5bb/r/oglu9ue9q9wfIQhk72MyUdoyVDcHjXL495kebj0P9KdI6bwNWeHYAxxCKzgfcF4yyV2MjG34jTSCmzfjXjYWGNqxMeTN0PPluSSBj4VhHHoKDPtt2d4eIZ7vHPPluSS93TiwLnSSlaSSiEJSSePPZKdlZQyV1SSlaSStRdKh2q1YEYepdo5qRrUkqSSlaSSzg3He2nf6Y%3D	Nő	Miskolci Egyetem		Alapképzési (Bsc)	Védőnő (Bsc)		Nappali	Első	Nem	Nem	Igen	Nem	Havonta vagy ritkábban	Igen	Igen	Igen	Medscape							Nyomtatott szakkönyvek	Nem		Igen	az 1.-2. évfolyamon	Nem, az angol és magyar nyelvű forrásokat egyaránt elolvasom	Átlagosnál jobb (4)	Átlagos (3)	Átlagos (3)	Átlagosnál jobb (4)	Valamennyire értek hozzá (2)	Átlagos (3)	Értem a jelentését, és másoknak is el tudnám magyarázni	Többé-kevésbé értem a jelentését	Értem a jelentését, és másoknak is el tudnám magyarázni	Értem a jelentését, és másoknak is el tudnám magyarázni	Többé-kevésbé értem a jelentését	Többé-kevésbé értem a jelentését	Értem a jelentését, és másoknak is el tudnám magyarázni	Értem a jelentését, és másoknak is el tudnám magyarázni	Nem ismerem a jelentését, de szeretném megismerni	Nem ismerem a jelentését, de szeretném megismerni	Értem a jelentését, és másoknak is el tudnám magyarázni	Értem a jelentését, és másoknak is el tudnám magyarázni	Értem a jelentését, és másoknak is el tudnám magyarázni
102	https://online-kerdoiv.com/index/view/hash/f505d52a49dd686dada6511e6d93f5bb/r/ncAC8d1m2oU7UA53HKW4IiSaHaPPluSSW1jMGzeFF8isAjWh95QV3Ia4OCzD0UoSSlaSSSC7U5hlfqvUIXnlrTGD9UDs6Z8hUkER0zIWRoZpzZ2SqbgZhdKgAoAitcbmaw8DZAF4VcSSePPihToF59DolkrSrj3xLstPzycjjSSlaSSK2jg5tCVWSbsZDu0%3D	Nő	Miskolci Egyetem		Alapképzési (Bsc)	Orvosi Diagnosztikai Laboratóriumi Analaitika (Bsc)		Nappali	Negyedik	Nem	Nem	Igen	Nem	Soha	Igen	Igen	Igen	Wikipedia							Oktatási jegyzetek	Nem		Igen	az 1.-2. évfolyamon	Igen, csak magyarul szeretek olvasni	Átlagos (3)	Gyenge (1)	Gyenge (1)	Valamennyire értek hozzá (2)	Gyenge (1)	Gyenge (1)	Többé-kevésbé értem a jelentését	Nem ismerem a jelentését, de szeretném megismerni	Többé-kevésbé értem a jelentését	Nem ismerem a jelentését, de szeretném megismerni	Nem ismerem a jelentését, de szeretném megismerni	Nem ismerem a jelentését, de szeretném megismerni	Nem ismerem a jelentését, de szeretném megismerni	Értem a jelentését, és másoknak is el tudnám magyarázni	Értem a jelentését, és másoknak is el tudnám magyarázni	Értem a jelentését, és másoknak is el tudnám magyarázni	Nem ismerem a jelentését, de szeretném megismerni	Nem ismerem a jelentését, de szeretném megismerni	Nem ismerem a jelentését, de szeretném megismerni
103	https://online-kerdoiv.com/index/view/hash/f505d52a49dd686dada6511e6d93f5bb/r/8XNxDxbesvLivSeY14vJbrSD1YCVZicSSlaSS5P6HdIoOtW8pOk8jyrvM3Kh8aTU0ww0yGMixaLfpXoEsO8QhQwWiigaSCzRWetbTn293APPluSSidZ0WUanBTIfAK2fmAu3foNPVpSSePP1XyDGrog2HaX3YhZHNxJZUp3VlgpEMMATe6aMw3X3dg%3D	Nő	Miskolci Egyetem		Alapképzési (Bsc)	Orvosi Diagnosztikai Laboratóriumi Analaitika (Bsc)		Nappali	Második	Nem	Igen	Igen	Igen	Naponta	Igen	Igen	Igen	Pubmed/Medline							Elektronikus folyóiratok	Igen	Igen	Igen	a 3.-4. évfolyamon	Nem, az angol és magyar nyelvű forrásokat egyaránt elolvasom	Haladó szintű (5)	Átlagosnál jobb (4)	Átlagosnál jobb (4)	Átlagosnál jobb (4)	Átlagosnál jobb (4)	Haladó szintű (5)	Értem a jelentését, és másoknak is el tudnám magyarázni	Többé-kevésbé értem a jelentését	Értem a jelentését, és másoknak is el tudnám magyarázni	Értem a jelentését, és másoknak is el tudnám magyarázni	Értem a jelentését, és másoknak is el tudnám magyarázni	Többé-kevésbé értem a jelentését	Értem a jelentését, és másoknak is el tudnám magyarázni	Többé-kevésbé értem a jelentését	Értem a jelentését, és másoknak is el tudnám magyarázni	Értem a jelentését, és másoknak is el tudnám magyarázni	Többé-kevésbé értem a jelentését	Értem a jelentését, és másoknak is el tudnám magyarázni	Értem a jelentését, és másoknak is el tudnám magyarázni
104	https://online-kerdoiv.com/index/view/hash/f505d52a49dd686dada6511e6d93f5bb/r/RaAWs9OgSW1y4SMpCz1zPlr0oShRQD9mSSlaSSPPluSSK5qCL6sPPluSSxCL9jzH7Wlvcak4fDqP6AxZy6acgGv5mBNSSlaSShejksovn3vVGPJ5zGwdaBYyHx3kO0hH6t6nHHBQSqlZAoPPluSS5l1LhSSePPJC4ShFElbBq5g7ovyTD5sKIRSSlaSSSSlaSS9pb1gIZIz9GJhqn7s%3D	Nő	Miskolci Egyetem		Alapképzési (Bsc)	Védőnő (Bsc)		Levelezős	Második	Igen	Nem	Igen	Nem	Havonta vagy ritkábban	Igen	Igen	Igen	Wikipedia							Nyomtatott szakkönyvek	Igen	Igen	Igen	a 3.-4. évfolyamon	Igen, csak magyarul szeretek olvasni	Átlagos (3)	Haladó szintű (5)	Gyenge (1)	Valamennyire értek hozzá (2)	Átlagosnál jobb (4)	Átlagosnál jobb (4)	Nincs véleményem ezzel kapcsolatosan	Nincs véleményem ezzel kapcsolatosan	Nincs véleményem ezzel kapcsolatosan	Nincs véleményem ezzel kapcsolatosan	Értem a jelentését, és másoknak is el tudnám magyarázni	Értem a jelentését, és másoknak is el tudnám magyarázni	Értem a jelentését, és másoknak is el tudnám magyarázni	Értem a jelentését, és másoknak is el tudnám magyarázni	Értem a jelentését, és másoknak is el tudnám magyarázni	Értem a jelentését, és másoknak is el tudnám magyarázni	Értem a jelentését, és másoknak is el tudnám magyarázni	Értem a jelentését, és másoknak is el tudnám magyarázni	Értem a jelentését, és másoknak is el tudnám magyarázni
105	https://online-kerdoiv.com/index/view/hash/f505d52a49dd686dada6511e6d93f5bb/r/6JyoVNrPPluSShy1cQ2Ja2MGSkcMRRSSlaSSUcUZ8dI3N3EkSSlaSSBTNzPPluSSsDlac7UdNSI6sAKlqypFGXUdQUeaiCZg4escwDKnBN2LmBGSSlaSS2XnLGExHAWAIRttou1BXuWwVSSlaSS6RhgiCavEOFSSePPk32XJSSlaSSbdk0dqWdvLl01SuZcaDRKqOI9PPluSSG5xSSlaSSR1ei5Cw%3D	Nő	Miskolci Egyetem		Alapképzési (Bsc)	Radiográfia (Bsc)		Nappali	Negyedik	Nem	Nem	Nem		Havonta vagy ritkábban	Igen	Igen	Igen	Google							Elektronikus szakkönyvek	Igen	Igen	Igen	a 3.-4. évfolyamon	Nem, az angol és magyar nyelvű forrásokat egyaránt elolvasom	Haladó szintű (5)	Haladó szintű (5)	Haladó szintű (5)	Átlagos (3)	Átlagosnál jobb (4)	Haladó szintű (5)	Értem a jelentését, és másoknak is el tudnám magyarázni	Értem a jelentését, és másoknak is el tudnám magyarázni	Értem a jelentését, és másoknak is el tudnám magyarázni	Értem a jelentését, és másoknak is el tudnám magyarázni	Nincs véleményem ezzel kapcsolatos	Többé-kevésbé értem a jelentését	Értem a jelentését, és másoknak is el tudnám magyarázni	Nem ismerem a jelentését, de szeretném megismerni	Nem ismerem a jelentését, de szeretném megismerni	Nem ismerem a jelentését, de szeretném megismerni	Többé-kevésbé értem a jelentését	Értem a jelentését, és másoknak is el tudnám magyarázni	Értem a jelentését, és másoknak is el tudnám magyarázni
106	https://online-kerdoiv.com/index/view/hash/f505d52a49dd686dada6511e6d93f5bb/r/wDgRdkMYiQV9oYVIRLd4mcu11O3ZQ6Z5cympFuG2ETz70kDlX4zEuxfuBG8UGLZ3Quu9gVxqcCwu3KxtSvwnSSlaSSdENOECQwqTX3gySlyZO92t7qVv6knEQASSlaSSqfSSlaSSrSSlaSSIthKuSSePPsHrkGzxqgtNa5EkfuHC8Vvrybh7XdbXoxMIglWSDvfc%3D	Nő	Debreceni Egyetem		Alapképzési (Bsc)	Védőnő (Bsc)		Nappali	Második	Nem	Nem	Nem		Havonta vagy ritkábban	Igen	Igen	Igen	Google							Egészségügyi szakemberek véleményének megismerése	Nem		Igen	a 3.-4. évfolyamon	Igen, csak magyarul szeretek olvasni	Átlagosnál jobb (4)	Átlagos (3)	Valamennyire értek hozzá (2)	Gyenge (1)	Gyenge (1)	Átlagos (3)	Többé-kevésbé értem a jelentését	Nem ismerem a jelentését, de szeretném megismerni	Értem a jelentését, és másoknak is el tudnám magyarázni	Értem a jelentését, és másoknak is el tudnám magyarázni	Értem a jelentését, és másoknak is el tudnám magyarázni	Értem a jelentését, és másoknak is el tudnám magyarázni	Nem ismerem a jelentését, de szeretném megismerni	Nem ismerem a jelentését, de szeretném megismerni	Nem ismerem a jelentését, de szeretném megismerni	Nem ismerem a jelentését, de szeretném megismerni	Nem ismerem a jelentését, de szeretném megismerni	Értem a jelentését, és másoknak is el tudnám magyarázni	Többé-kevésbé értem a jelentését
107	https://online-kerdoiv.com/index/view/hash/f505d52a49dd686dada6511e6d93f5bb/r/mn3oi12Z9p8f8Te6HOZxOEEUtU7UPA8rlg0gVxzvO4ChwdFsCv3GtOMl05QAAHekcp5cZgb29LBPGx4I4Ze8wmtyXd6tudDgLdVbTQ8WOIq1cAmQdv5cbjLMpylDft0CSSePP0trO9Z5CmBoPABmF9D9yCnEhYG9nWe5P4xGoTW5CH1Y%3D	Nő	Miskolci Egyetem		Alapképzési (Bsc)	Védőnő (Bsc)		Nappali	Negyedik	Nem	Nem	Nem		Hetente	Igen	Igen	Igen	Google							Oktatási jegyzetek	Nem		Igen	az 1.-2. évfolyamon	Igen, csak magyarul szeretek olvasni	Átlagosnál jobb (4)	Haladó szintű (5)	Valamennyire értek hozzá (2)	Gyenge (1)	Valamennyire értek hozzá (2)	Átlagosnál jobb (4)	Többé-kevésbé értem a jelentését	Többé-kevésbé értem a jelentését	Többé-kevésbé értem a jelentését	Értem a jelentését, és másoknak is el tudnám magyarázni	Nem ismerem a jelentését, de szeretném megismerni	Nem ismerem a jelentését, de szeretném megismerni	Nem ismerem a jelentését, de szeretném megismerni	Értem a jelentését, és másoknak is el tudnám magyarázni	Többé-kevésbé értem a jelentését	Többé-kevésbé értem a jelentését	Értem a jelentését, és másoknak is el tudnám magyarázni	Értem a jelentését, és másoknak is el tudnám magyarázni	Többé-kevésbé értem a jelentését
108	https://online-kerdoiv.com/index/view/hash/f505d52a49dd686dada6511e6d93f5bb/r/6BBrofjkinqsEZxtXSiMsccIOoceVH5LSSlaSSSdzajrCIxkhKzNLxDMPPluSS511hiOx6qVanPPluSSSSlaSS9vits9lzxeJxcSue1qWSSlaSSXO1lq619WQuqOSpThoV61nfT5asEqyjnRtJj7BmckGSSePPJjNparmqzG9SwXC1Li6PPluSSBXo3KK27EK1xPPPg9dgI0c0%3D	Nő	Szegedi Tudományegetem		Alapképzési (Bsc)	Ápoló (Bsc)		Levelezős	Harmadik	Igen	Nem	Nem		Havonta vagy ritkábban	Igen	Igen	Nem	Pubmed/Medline							Nyomtatott szakkönyvek	Igen	Igen	Igen	a 3.-4. évfolyamon	Nem, sőt, olvastam már olyan forrást is, ami egyéb (nem angol vagy magyar) nyelven íródott	Átlagosnál jobb (4)	Átlagosnál jobb (4)	Átlagosnál jobb (4)	Átlagosnál jobb (4)	Átlagosnál jobb (4)	Átlagosnál jobb (4)	Értem a jelentését, és másoknak is el tudnám magyarázni	Értem a jelentését, és másoknak is el tudnám magyarázni	Értem a jelentését, és másoknak is el tudnám magyarázni	Értem a jelentését, és másoknak is el tudnám magyarázni	Értem a jelentését, és másoknak is el tudnám magyarázni	Értem a jelentését, és másoknak is el tudnám magyarázni	Értem a jelentését, és másoknak is el tudnám magyarázni	Értem a jelentését, és másoknak is el tudnám magyarázni	Értem a jelentését, és másoknak is el tudnám magyarázni	Értem a jelentését, és másoknak is el tudnám magyarázni	Értem a jelentését, és másoknak is el tudnám magyarázni	Értem a jelentését, és másoknak is el tudnám magyarázni	Értem a jelentését, és másoknak is el tudnám magyarázni
109	https://online-kerdoiv.com/index/view/hash/f505d52a49dd686dada6511e6d93f5bb/r/VI6CvMKFQk3PPluSSzHTADAWmCO8BdYKbtx9LJMR5iBxBG9yqwqPnFt8BCTr4H3EoJ364kSPPluSSADrXIIB4puSSSlaSSfJejRdW93cEUHlNHQBx4zhLT5b6yCimtSSSlaSS7LSSlaSSY3sMzUPcpGNYSSePPtbiZPPluSSYzFbE0v7tFK2SJxuQCwUybfYJwBFTgGGKQ1ULk%3D	Nő	Miskolci Egyetem		Alapképzési (Bsc)	Gyógytornász (Bsc)		Nappali	Első	Nem	Nem	Igen	Nem	Havonta vagy ritkábban	Igen	Igen	Nem	Google							Oktatási jegyzetek	Nem		Igen	az 1.-2. évfolyamon	Nem, az angol és magyar nyelvű forrásokat egyaránt elolvasom	Átlagos (3)	Átlagosnál jobb (4)	Gyenge (1)	Gyenge (1)	Valamennyire értek hozzá (2)	Átlagos (3)	Nem ismerem a jelentését, de szeretném megismerni	Nem ismerem a jelentését, de szeretném megismerni	Többé-kevésbé értem a jelentését	Értem a jelentését, és másoknak is el tudnám magyarázni	Nem ismerem a jelentését, de szeretném megismerni	Többé-kevésbé értem a jelentését	Többé-kevésbé értem a jelentését	Nem ismerem a jelentését, de szeretném megismerni	Nem ismerem a jelentését, de szeretném megismerni	Nem ismerem a jelentését, de szeretném megismerni	Többé-kevésbé értem a jelentését	Értem a jelentését, és másoknak is el tudnám magyarázni	Többé-kevésbé értem a jelentését
110	https://online-kerdoiv.com/index/view/hash/f505d52a49dd686dada6511e6d93f5bb/r/7bdb1IKiSSlaSSKBRppmVwCai17CzkwGu9ANDsRSIjnmA8YUsMD3mkaBEZRSSlaSS8fHkWciPqwBHQClO5iUkIjFoJmbKyNZoTCSSlaSS2eUG7QqI7HX1xJ6LUlC47gX1aDzi3YpypdBxZ4SSePPzyna29fSIsc7m8yNG1PEIdPPluSS6xAOlcFav4lsYDLlDSSlaSSq0%3D	Nő	Miskolci Egyetem		Alapképzési (Bsc)	Orvosi Diagnosztikai Laboratóriumi Analaitika (Bsc)		Nappali	Harmadik	Nem	Nem	Nem		Havonta vagy ritkábban	Igen	Igen	Igen	Google							Nyomtatott szakkönyvek	Nem		Igen	a 3.-4. évfolyamon	Nem, sőt, olvastam már olyan forrást is, ami egyéb (nem angol vagy magyar) nyelven íródott	Átlagos (3)	Átlagos (3)	Valamennyire értek hozzá (2)	Átlagos (3)	Valamennyire értek hozzá (2)	Átlagos (3)	Nem ismerem a jelentését, de szerintem nem is hasznos számomra	Nem ismerem a jelentését, de szeretném megismerni	Többé-kevésbé értem a jelentését	Nem ismerem a jelentését, de szeretném megismerni	Nem ismerem a jelentését, de szeretném megismerni	Nem ismerem a jelentését, de szeretném megismerni	Nem ismerem a jelentését, de szeretném megismerni	Nem ismerem a jelentését, de szeretném megismerni	Többé-kevésbé értem a jelentését	Nem ismerem a jelentését, de szerintem nem is hasznos számomra	Nem ismerem a jelentését, de szeretném megismerni	Többé-kevésbé értem a jelentését	Nem ismerem a jelentését, de szerintem nem is hasznos számomra
111	https://online-kerdoiv.com/index/view/hash/f505d52a49dd686dada6511e6d93f5bb/r/WvXTw8DiOPbdEvtPVebRhhBuL2xeSSlaSSWGJJFx3l0ZIGoonxSSlaSSYek71MwEOaE0gXpHl1DnnTuMdCydZg6GvryLygDeoZXLylGX5AhSSlaSSI1Y00sXUBZPpieJ7YPfhi2AmWWrGJESSePPpd2XfafjythPPluSSs1Hp3OwViNhdbZU4DDAt2R523rl6KKs%3D	Nő	Miskolci Egyetem		Alapképzési (Bsc)	Gyógytornász (Bsc)		Nappali	Második	Nem	Nem	Nem		Hetente	Igen	Igen	Nem	Google							Oktatási jegyzetek	Nem		Igen	a 3.-4. évfolyamon	Igen, csak magyarul szeretek olvasni	Átlagos (3)	Átlagosnál jobb (4)	Gyenge (1)	Gyenge (1)	Valamennyire értek hozzá (2)	Átlagosnál jobb (4)	Értem a jelentését, és másoknak is el tudnám magyarázni	Értem a jelentését, és másoknak is el tudnám magyarázni	Értem a jelentését, és másoknak is el tudnám magyarázni	Értem a jelentését, és másoknak is el tudnám magyarázni	Többé-kevésbé értem a jelentését	Többé-kevésbé értem a jelentését	Többé-kevésbé értem a jelentését	Többé-kevésbé értem a jelentését	Többé-kevésbé értem a jelentését	Többé-kevésbé értem a jelentését	Értem a jelentését, és másoknak is el tudnám magyarázni	Értem a jelentését, és másoknak is el tudnám magyarázni	Értem a jelentését, és másoknak is el tudnám magyarázni
112	https://online-kerdoiv.com/index/view/hash/f505d52a49dd686dada6511e6d93f5bb/r/tPPluSSkRi3otw8oc890dC050rNGK61Gv41lDFSSlaSSna4aaVOa9ZcMMopqqdfh2kjbBdkMgt1QOwUH4QfO6hikezX24K0RXIjbpb4aoJz1zgvyCpuQjwrtykUnQHnExxxiSPQ9QHSSePP1r6u8W19lolblCl3RccebpvecFNO9QBPPluSSojOB4VUEbiM%3D	Nő	Miskolci Egyetem		Alapképzési (Bsc)	Védőnő (Bsc)		Nappali	Harmadik	Nem	Igen	Nem		Hetente	Igen	Igen	Nem	Google							Nyomtatott szakkönyvek	Igen	Igen	Igen	a 3.-4. évfolyamon	Igen, csak magyarul szeretek olvasni	Átlagos (3)	Átlagos (3)	Valamennyire értek hozzá (2)	Átlagos (3)	Valamennyire értek hozzá (2)	Átlagosnál jobb (4)	Értem a jelentését, és másoknak is el tudnám magyarázni	Többé-kevésbé értem a jelentését	Többé-kevésbé értem a jelentését	Többé-kevésbé értem a jelentését	Többé-kevésbé értem a jelentését	Többé-kevésbé értem a jelentését	Értem a jelentését, és másoknak is el tudnám magyarázni	Értem a jelentését, és másoknak is el tudnám magyarázni	Nem ismerem a jelentését, de szeretném megismerni	Nem ismerem a jelentését, de szeretném megismerni	Többé-kevésbé értem a jelentését	Értem a jelentését, és másoknak is el tudnám magyarázni	Többé-kevésbé értem a jelentését
113	https://online-kerdoiv.com/index/view/hash/f505d52a49dd686dada6511e6d93f5bb/r/jqyvSSlaSSiHblSJwDqEaklLlP8ABMQCDKezV2V3ONxYCW25rx7vLxxBe9HJFHPPluSSTZFtSSlaSSboddM6pE21c5Bm68O5EemI83diRZW0J9VfwfdwEtdg3xJbVOWgiNLvGGGHWSSlaSSjLlIcSSePPUvas6cCf1SSlaSSmqiJps4L0iFCFwund495OOK0mDDrl6LKI%3D	Nő	Miskolci Egyetem		Alapképzési (Bsc)	Radiográfia (Bsc)		Nappali	Első	Nem	Nem	Nem		Soha	Igen	Igen	Igen	Google							Nyomtatott szakkönyvek	Nem		Nem		Igen, csak magyarul szeretek olvasni	Átlagos (3)	Haladó szintű (5)	Gyenge (1)	Gyenge (1)	Haladó (5)	Valamennyire értek hozzá (2)	Nem ismerem a jelentését, de szeretném megismerni	Nincs véleményem ezzel kapcsolatosan	Értem a jelentését, és másoknak is el tudnám magyarázni	Értem a jelentését, és másoknak is el tudnám magyarázni	Nincs véleményem ezzel kapcsolatos	Nincs véleményem ezzel kapcsolatos	Többé-kevésbé értem a jelentését	Értem a jelentését, és másoknak is el tudnám magyarázni	Nincs véleményem ezzel kapcsolatosan	Nincs véleményem ezzel kapcsolatosan	Értem a jelentését, és másoknak is el tudnám magyarázni	Értem a jelentését, és másoknak is el tudnám magyarázni	Nem ismerem a jelentését, de szeretném megismerni
114	https://online-kerdoiv.com/index/view/hash/f505d52a49dd686dada6511e6d93f5bb/r/i3nMYszIxF5TDqPPluSSaOX7irszN0VhuAuxcWR5BPPluSSQ6R6sukQB3sPPluSSTXwSOJvFzMNX6BMrPkfnvVW9f4LEEQNSSlaSSjndSaGPEgt1qqKPPluSSHPPluSS70SThSnubHuI7yS5wxuXUrypRWtdqSSlaSSSSePPPwulSSlaSSzPMFPPluSSIuRLJwjWYuhzEEhFw6HSahTH7nbkHYqQg%3D	Nő	Miskolci Egyetem		Alapképzési (Bsc)	Orvosi Diagnosztikai Laboratóriumi Analaitika (Bsc)		Nappali	Első	Nem	Nem	Igen	Igen	Naponta	Igen	Igen	Nem	Google							Elektonikus média	Nem		Igen	a 3.-4. évfolyamon	Nem, sőt, olvastam már olyan forrást is, ami egyéb (nem angol vagy magyar) nyelven íródott	Haladó szintű (5)	Átlagosnál jobb (4)	Átlagos (3)	Átlagos (3)	Átlagos (3)	Átlagos (3)	Többé-kevésbé értem a jelentését	Többé-kevésbé értem a jelentését	Többé-kevésbé értem a jelentését	Többé-kevésbé értem a jelentését	Nem ismerem a jelentését, de szeretném megismerni	Nem ismerem a jelentését, de szeretném megismerni	Nem ismerem a jelentését, de szeretném megismerni	Nem ismerem a jelentését, de szeretném megismerni	Nem ismerem a jelentését, de szeretném megismerni	Nem ismerem a jelentését, de szeretném megismerni	Nem ismerem a jelentését, de szeretném megismerni	Nem ismerem a jelentését, de szeretném megismerni	Nem ismerem a jelentését, de szeretném megismerni
115	https://online-kerdoiv.com/index/view/hash/f505d52a49dd686dada6511e6d93f5bb/r/4YTeFYiQPDQjZsC7qu1yXs6pRUmAtYST73bk7D6Nml9A8ZssCymYvYuTa7PIPPluSSr2hq4TPPluSSibpiwB5Ta1CKKs2I9UVJ7TcQiJTnWthO94Ytt3fuf0fqDBoRMiTPPluSSvmRben7rSSePP9UHE2HTT7gsCauUbEShGTVeFPPluSSOJSS66TNgu5ZTOTgJM%3D	Nő	Miskolci Egyetem		Alapképzési (Bsc)	Gyógytornász (Bsc)		Nappali	Negyedik	Nem	Nem	Nem		Havonta vagy ritkábban	Igen	Igen	Nem	Google							Nyomtatott szakkönyvek	Nem		Nem		Nem, az angol és magyar nyelvű forrásokat egyaránt elolvasom	Átlagos (3)	Átlagos (3)	Átlagos (3)	Valamennyire értek hozzá (2)	Valamennyire értek hozzá (2)	Átlagosnál jobb (4)	Nincs véleményem ezzel kapcsolatosan	Nincs véleményem ezzel kapcsolatosan	Nincs véleményem ezzel kapcsolatosan	Nincs véleményem ezzel kapcsolatosan	Nincs véleményem ezzel kapcsolatos	Nincs véleményem ezzel kapcsolatos	Értem a jelentését, és másoknak is el tudnám magyarázni	Nincs véleményem ezzel kapcsolatosan	Nincs véleményem ezzel kapcsolatosan	Nincs véleményem ezzel kapcsolatosan	Nincs véleményem ezzel kapcsolatosan	Nincs véleményem ezzel kapcsolatosan	Nincs véleményem ezzel kapcsolatosan
116	https://online-kerdoiv.com/index/view/hash/f505d52a49dd686dada6511e6d93f5bb/r/ZqhV2Z1Mkgo57gH9iCLQaCSzRVYlgkknvYzL9zaM6k27KUv7KyUGKllmBGPenEfEIGgMR1i9PlTdPPluSSFJRmzYzwGQk57D1pAfJGniVddlMHP3dWqjkwXciP72uh7KNESDNSSePP9ne3LmifHPPluSSKGwEM6M0uVUQ7xL6WGPPluSSRYPPluSSyPPluSSnu9ORbpjc%3D	Nő	Szegedi Tudományegetem		Alapképzési (Bsc)	Ápoló (Bsc)		Nappali	Első	Nem	Nem	Nem		Soha	Igen	Igen	Igen	Google							Nyomtatott szakkönyvek	Nem		Igen	az 1.-2. évfolyamon	Igen, csak magyarul szeretek olvasni	Átlagos (3)	Átlagos (3)	Valamennyire értek hozzá (2)	Gyenge (1)	Valamennyire értek hozzá (2)	Átlagos (3)	Többé-kevésbé értem a jelentését	Többé-kevésbé értem a jelentését	Értem a jelentését, és másoknak is el tudnám magyarázni	Többé-kevésbé értem a jelentését	Nem ismerem a jelentését, de szeretném megismerni	Nem ismerem a jelentését, de szeretném megismerni	Többé-kevésbé értem a jelentését	Többé-kevésbé értem a jelentését	Nem ismerem a jelentését, de szeretném megismerni	Nem ismerem a jelentését, de szeretném megismerni	Többé-kevésbé értem a jelentését	Többé-kevésbé értem a jelentését	Többé-kevésbé értem a jelentését
117	https://online-kerdoiv.com/index/view/hash/f505d52a49dd686dada6511e6d93f5bb/r/qrkwJGmipgai9p6XETScvSSlaSScUHJB2HIDaK6PPluSSXQoba64bjLGcGaqGlvJW20spi8oSXPPluSSSMjtBnu4bT2fRinc5GpPZrvDfpUcvEzQKyGKePRSSlaSSe5hHtp4AkbtoIZIJi30QkLxSSePPAIl3cQmihZjOd48LY4G4EMtUmxhenk8OTc5PPluSSnjKSpio%3D	Nő	Miskolci Egyetem		Alapképzési (Bsc)	Gyógytornász (Bsc)		Nappali	Első	Nem	Nem	Igen	Nem	Soha	Igen	Igen	Nem	Google							Elektronikus szakkönyvek	Nem		Igen	a 3.-4. évfolyamon	Igen, csak magyarul szeretek olvasni	Átlagosnál jobb (4)	Valamennyire értek hozzá (2)	Gyenge (1)	Gyenge (1)	Gyenge (1)	Átlagosnál jobb (4)	Nem ismerem a jelentését, de szeretném megismerni	Nem ismerem a jelentését, de szeretném megismerni	Értem a jelentését, és másoknak is el tudnám magyarázni	Értem a jelentését, és másoknak is el tudnám magyarázni	Nem ismerem a jelentését, de szeretném megismerni	Nem ismerem a jelentését, de szeretném megismerni	Nem ismerem a jelentését, de szeretném megismerni	Értem a jelentését, és másoknak is el tudnám magyarázni	Nem ismerem a jelentését, de szeretném megismerni	Nem ismerem a jelentését, de szeretném megismerni	Értem a jelentését, és másoknak is el tudnám magyarázni	Értem a jelentését, és másoknak is el tudnám magyarázni	Nem ismerem a jelentését, de szeretném megismerni
118	https://online-kerdoiv.com/index/view/hash/f505d52a49dd686dada6511e6d93f5bb/r/bQFHJxRKYxWSvEoGMiSHafwAdRvEFmQ0n9UsI9bU6jiGaLmA0mTG2Vk11Wso66whCbISQWmwaPPluSSSSlaSSNQ6P6ObQBsQxEo2DfPPluSSPQWnXlHvaKK1GA6vbneCgWNvjMASwe6UCIrSSePP85ZgHMNOXvR2KGhcQ3xSSlaSSFP6MuLtcTxeWnMBoprTe9UE%3D	Nő	Miskolci Egyetem		Alapképzési (Bsc)	Gyógytornász (Bsc)		Nappali	Első	Nem	Nem	Nem		Havonta vagy ritkábban	Igen	Igen	Nem	Google							Nyomtatott szakkönyvek	Nem		Igen	a 3.-4. évfolyamon	Nem, az angol és magyar nyelvű forrásokat egyaránt elolvasom	Átlagos (3)	Átlagosnál jobb (4)	Átlagos (3)	Valamennyire értek hozzá (2)	Átlagos (3)	Átlagos (3)	Többé-kevésbé értem a jelentését	Nem ismerem a jelentését, de szeretném megismerni	Többé-kevésbé értem a jelentését	Többé-kevésbé értem a jelentését	Nem ismerem a jelentését, de szeretném megismerni	Nem ismerem a jelentését, de szeretném megismerni	Többé-kevésbé értem a jelentését	Többé-kevésbé értem a jelentését	Nem ismerem a jelentését, de szeretném megismerni	Nem ismerem a jelentését, de szeretném megismerni	Többé-kevésbé értem a jelentését	Többé-kevésbé értem a jelentését	Többé-kevésbé értem a jelentését
119	https://online-kerdoiv.com/index/view/hash/f505d52a49dd686dada6511e6d93f5bb/r/62EsC2t0EOtm4flCVxPPluSS8AB5Px88mdqOTRy0v4d24Nn8PPluSSLnaAyiEPPluSS3Of8cCdPPluSSAgJndRcWuwF8FLnw53C5XSSlaSSQgZQYg0pyVd0PPluSSkYuJYqxA9dlr094di8p6mYROmaC8kSXOhSSePPFMLZVJpVwK98OOooBVHredG0tSfQVfeVeA1H5WFzWkI%3D	Nő	Miskolci Egyetem		Alapképzési (Bsc)	Gyógytornász (Bsc)		Nappali	Harmadik	Nem	Nem	Nem		Havonta vagy ritkábban	Igen	Igen	Nem	Google							Egészségügyi szakemberek véleményének megismerése	Igen	Igen	Igen	a 3.-4. évfolyamon	Igen, csak magyarul szeretek olvasni	Átlagos (3)	Átlagos (3)	Valamennyire értek hozzá (2)	Gyenge (1)	Átlagosnál jobb (4)	Átlagosnál jobb (4)	Értem a jelentését, és másoknak is el tudnám magyarázni	Többé-kevésbé értem a jelentését	Értem a jelentését, és másoknak is el tudnám magyarázni	Értem a jelentését, és másoknak is el tudnám magyarázni	Nem ismerem a jelentését, de szeretném megismerni	Nem ismerem a jelentését, de szeretném megismerni	Többé-kevésbé értem a jelentését	Többé-kevésbé értem a jelentését	Nem ismerem a jelentését, de szeretném megismerni	Nem ismerem a jelentését, de szeretném megismerni	Nem ismerem a jelentését, de szeretném megismerni	Értem a jelentését, és másoknak is el tudnám magyarázni	Többé-kevésbé értem a jelentését
120	https://online-kerdoiv.com/index/view/hash/f505d52a49dd686dada6511e6d93f5bb/r/LnSSlaSSuqV336ZkVhB3WPPluSSTGA7HgA7bVL3i9gp9U82r9uHVaqD4yJrY8h4zB6JTqkwLTpTr09M9hBPPluSSG1w2PPluSSTqlwKzcYzv0VQPPluSSdwDukOqqGkL2dk8TOlSfDNHZiIpjqyEUMUBISSePPg2yIPPluSS1wi9fuICQtEkbzz0m9MKNk7akffpKyHSSlaSS9urgPPluSSs%3D	Nő	Miskolci Egyetem		Alapképzési (Bsc)	Gyógytornász (Bsc)		Nappali	Második	Nem	Nem	Nem		Havonta vagy ritkábban	Igen	Igen	Igen	Google							Nyomtatott szakkönyvek	Nem		Igen	az 1.-2. évfolyamon	Igen, csak magyarul szeretek olvasni	Átlagos (3)	Átlagos (3)	Valamennyire értek hozzá (2)	Gyenge (1)	Valamennyire értek hozzá (2)	Átlagos (3)	Többé-kevésbé értem a jelentését	Nem ismerem a jelentését, de szeretném megismerni	Többé-kevésbé értem a jelentését	Többé-kevésbé értem a jelentését	Nem ismerem a jelentését, de szeretném megismerni	Nem ismerem a jelentését, de szeretném megismerni	Többé-kevésbé értem a jelentését	Többé-kevésbé értem a jelentését	Nem ismerem a jelentését, de szeretném megismerni	Nem ismerem a jelentését, de szeretném megismerni	Nem ismerem a jelentését, de szeretném megismerni	Többé-kevésbé értem a jelentését	Többé-kevésbé értem a jelentését
121	https://online-kerdoiv.com/index/view/hash/f505d52a49dd686dada6511e6d93f5bb/r/YpXEa6ASB4hY0q5lojLOZLSSMJr3JT2yk2IBiaUgvuokK2pPPluSSfv9S8H8PNtAt4R5Fm9qQPPluSShjr1hJ9SSlaSSwZeMo5QHLzqibrI0NnMk2FTm8HXfiDpv2NEAv0QnXPPluSS1poOid2C7SSePPQXSSlaSS7LDDi8lUWPAzvMR9LlPEDPK6TDHlVPp7IIrZYyPPluSSI%3D	Férfi	Szegedi Tudományegetem		Alapképzési (Bsc)	Ápoló (Bsc)		Nappali	Negyedik	Nem	Nem	Nem		Havonta vagy ritkábban	Igen	Igen	Nem	Medscape							Elektronikus folyóiratok	Nem		Igen	a 3.-4. évfolyamon	Nem, az angol és magyar nyelvű forrásokat egyaránt elolvasom	Átlagos (3)	Átlagos (3)	Valamennyire értek hozzá (2)	Valamennyire értek hozzá (2)	Átlagos (3)	Átlagosnál jobb (4)	Többé-kevésbé értem a jelentését	Nem ismerem a jelentését, de szeretném megismerni	Értem a jelentését, és másoknak is el tudnám magyarázni	Értem a jelentését, és másoknak is el tudnám magyarázni	Nem ismerem a jelentését, de szeretném megismerni	Nem ismerem a jelentését, de szeretném megismerni	Többé-kevésbé értem a jelentését	Értem a jelentését, és másoknak is el tudnám magyarázni	Nem ismerem a jelentését, de szeretném megismerni	Többé-kevésbé értem a jelentését	Értem a jelentését, és másoknak is el tudnám magyarázni	Értem a jelentését, és másoknak is el tudnám magyarázni	Többé-kevésbé értem a jelentését
122	https://online-kerdoiv.com/index/view/hash/f505d52a49dd686dada6511e6d93f5bb/r/MBSSlaSSHJLGTyKzHSSlaSS3hcBmjItIn3180lau3twR7tEPRPPluSSPPluSSoVXT7m785x18YEG6NKTxdPPluSSiOb54R1mxZdNBQznyP91hbBevIDn0PIJs9Gx89oovMlwbbTASY6ecXzqmH9BNmsMCSSePPPq37r82MRVXK7JjJj6vj5iP8vVnPHBkzrZKCb7eUoDY%3D	Nő	Szegedi Tudományegetem		Alapképzési (Bsc)	Gyógytornász (Bsc)		Nappali	Harmadik	Nem	Nem	Igen	Nem	Hetente	Igen	Igen	Nem	Google							Nyomtatott szakkönyvek	Igen	Igen	Igen	a 3.-4. évfolyamon	Nem, az angol és magyar nyelvű forrásokat egyaránt elolvasom	Átlagos (3)	Átlagosnál jobb (4)	Átlagos (3)	Átlagos (3)	Átlagosnál jobb (4)	Átlagosnál jobb (4)	Többé-kevésbé értem a jelentését	Nem ismerem a jelentését, de szeretném megismerni	Többé-kevésbé értem a jelentését	Többé-kevésbé értem a jelentését	Nem ismerem a jelentését, de szeretném megismerni	Nem ismerem a jelentését, de szeretném megismerni	Értem a jelentését, és másoknak is el tudnám magyarázni	Értem a jelentését, és másoknak is el tudnám magyarázni	Nem ismerem a jelentését, de szeretném megismerni	Nem ismerem a jelentését, de szeretném megismerni	Értem a jelentését, és másoknak is el tudnám magyarázni	Értem a jelentését, és másoknak is el tudnám magyarázni	Értem a jelentését, és másoknak is el tudnám magyarázni
123	https://online-kerdoiv.com/index/view/hash/f505d52a49dd686dada6511e6d93f5bb/r/7Gw3PPIB1ImAUFweSSlaSSiXZZYnFfv8jSSlaSSg84NNgDPPluSSnlJyfKlawJ9Yb9y36YSc4Gp4krwCl7uSSlaSSWvSSlaSSlkKepogY7WUd3GDyodFAuQqTkeljMjePPluSSE5RZPPluSSFKVbOXkSuIuSSlaSSeo8FfOGSSePPiSSlaSS8RPt3QxOCGt2XBMJmwFdyTI5OMc9TbtxBkfsUy7c8%3D	Nő	Miskolci Egyetem		Alapképzési (Bsc)	Gyógytornász (Bsc)		Nappali	Harmadik	Nem	Nem	Igen	Igen	Havonta vagy ritkábban	Igen	Igen	Igen	Google							Nyomtatott szakkönyvek	Nem		Igen	a 3.-4. évfolyamon	Igen, csak magyarul szeretek olvasni	Átlagosnál jobb (4)	Átlagosnál jobb (4)	Átlagosnál jobb (4)	Valamennyire értek hozzá (2)	Átlagos (3)	Átlagos (3)	Értem a jelentését, és másoknak is el tudnám magyarázni	Értem a jelentését, és másoknak is el tudnám magyarázni	Értem a jelentését, és másoknak is el tudnám magyarázni	Nincs véleményem ezzel kapcsolatosan	Nem ismerem a jelentését, de szeretném megismerni	Többé-kevésbé értem a jelentését	Többé-kevésbé értem a jelentését	Értem a jelentését, és másoknak is el tudnám magyarázni	Nincs véleményem ezzel kapcsolatosan	Többé-kevésbé értem a jelentését	Nem ismerem a jelentését, de szeretném megismerni	Értem a jelentését, és másoknak is el tudnám magyarázni	Értem a jelentését, és másoknak is el tudnám magyarázni
124	https://online-kerdoiv.com/index/view/hash/f505d52a49dd686dada6511e6d93f5bb/r/A8vUkUPVOzxX4FL9DdAn4iB0cQ0ijziIgz3yX3HDbp4cAELzayJ7QbdstcZgZASSlaSSKml17amlvvkSSlaSSTJLYSSlaSSoAMPrcPPluSSbhzegYRaOE1sG2YGwV41p5iD1Gs4rgTAGSSlaSSJlH9FRqSSePPHnl9cwHXLwUjqbcRQue7cZUsqBiwu2ZrFSSlaSSjrw5Wqqek%3D	Nő	Miskolci Egyetem		Alapképzési (Bsc)	Orvosi Diagnosztikai Laboratóriumi Analaitika (Bsc)		Nappali	Első	Nem	Nem	Nem		Havonta vagy ritkábban	Igen	Igen	Nem	Google							Elektronikus folyóiratok	Nem		Igen	a 3.-4. évfolyamon	Igen, csak magyarul szeretek olvasni	Átlagos (3)	Átlagos (3)	Átlagos (3)	Átlagos (3)	Átlagosnál jobb (4)	Átlagos (3)	Értem a jelentését, és másoknak is el tudnám magyarázni	Értem a jelentését, és másoknak is el tudnám magyarázni	Értem a jelentését, és másoknak is el tudnám magyarázni	Értem a jelentését, és másoknak is el tudnám magyarázni	Többé-kevésbé értem a jelentését	Többé-kevésbé értem a jelentését	Nem ismerem a jelentését, de szeretném megismerni	Értem a jelentését, és másoknak is el tudnám magyarázni	Értem a jelentését, és másoknak is el tudnám magyarázni	Értem a jelentését, és másoknak is el tudnám magyarázni	Értem a jelentését, és másoknak is el tudnám magyarázni	Értem a jelentését, és másoknak is el tudnám magyarázni	Többé-kevésbé értem a jelentését
125	https://online-kerdoiv.com/index/view/hash/f505d52a49dd686dada6511e6d93f5bb/r/KuzSLMlmOSFxvJUT4GhvHSSlaSSVn6hxkDiEVtVIHopy0Z0GSg8ppDbBTJm11RMgkWMin0uSu5FE3PpKGkQE0SSlaSSnPPluSSI0L4pKC9gw6ryKFfhAdXvT6yMijPPluSSP9BvH8FInawjCjepLSSePPVLVakibEvLRaIa8EJS1uhayxXezVuegBrnzfGQJ9PPluSSf0%3D	Nő	Miskolci Egyetem		Alapképzési (Bsc)	Orvosi Diagnosztikai Laboratóriumi Analaitika (Bsc)		Nappali	Harmadik	Nem	Igen	Igen	Igen	Havonta vagy ritkábban	Igen	Igen	Igen	Medscape							Nyomtatott szakkönyvek	Nem		Igen	a 3.-4. évfolyamon	Nem, az angol és magyar nyelvű forrásokat egyaránt elolvasom	Átlagos (3)	Átlagos (3)	Átlagos (3)	Valamennyire értek hozzá (2)	Gyenge (1)	Valamennyire értek hozzá (2)	Többé-kevésbé értem a jelentését	Többé-kevésbé értem a jelentését	Értem a jelentését, és másoknak is el tudnám magyarázni	Értem a jelentését, és másoknak is el tudnám magyarázni	Nem ismerem a jelentését, de szeretném megismerni	Nem ismerem a jelentését, de szeretném megismerni	Többé-kevésbé értem a jelentését	Nem ismerem a jelentését, de szeretném megismerni	Nem ismerem a jelentését, de szeretném megismerni	Nem ismerem a jelentését, de szeretném megismerni	Többé-kevésbé értem a jelentését	Többé-kevésbé értem a jelentését	Többé-kevésbé értem a jelentését
126	https://online-kerdoiv.com/index/view/hash/f505d52a49dd686dada6511e6d93f5bb/r/DwI6SSlaSSGlwBkNLwhV4uMtiDhAp3DkCwlFMWYYqBqicTuQksgfsPZlhCYEiRunl62XRfEU2FrEDeLLTdsqQ3EjUlMiqMItPVPnn78TdUyROQgXzeplSSlaSSizpiHzrpjH8oPOE4SSePP2soZoJ8zVp95744avVCsMVvo8HDrOIvcnRTwI7qX9Fs%3D	Nő	Szegedi Tudományegetem		Alapképzési (Bsc)		Dentálhigiénikus (Bsc)	Nappali	Második	Nem	Nem	Igen	Nem	Havonta vagy ritkábban	Igen	Igen	Igen	Google							Nyomtatott szakkönyvek	Nem		Igen	a 3.-4. évfolyamon	Nem, az angol és magyar nyelvű forrásokat egyaránt elolvasom	Valamennyire értek hozzá (2)	Valamennyire értek hozzá (2)	Valamennyire értek hozzá (2)	Valamennyire értek hozzá (2)	Valamennyire értek hozzá (2)	Átlagos (3)	Többé-kevésbé értem a jelentését	Többé-kevésbé értem a jelentését	Többé-kevésbé értem a jelentését	Többé-kevésbé értem a jelentését	Többé-kevésbé értem a jelentését	Nem ismerem a jelentését, de szeretném megismerni	Többé-kevésbé értem a jelentését	Értem a jelentését, és másoknak is el tudnám magyarázni	Nem ismerem a jelentését, de szeretném megismerni	Nem ismerem a jelentését, de szeretném megismerni	Többé-kevésbé értem a jelentését	Értem a jelentését, és másoknak is el tudnám magyarázni	Többé-kevésbé értem a jelentését
127	https://online-kerdoiv.com/index/view/hash/f505d52a49dd686dada6511e6d93f5bb/r/EgPPluSS5zqrySu7Q3jhOVc0B8wFbAZMBTVSSlaSSsZHsyAghglCvpJ7uqseLmUm0PPluSSEMbIBvMaq8MGLHs3BcFPPluSSKQME9Y883uJICmSfWLhxDSSlaSSNF70hqQmjkRXe4UMqRFQ1UTSSlaSSHfdFUXSSePPZBnFVIxWxytOqUIdHQPF368lVkURyZPsPPluSSr7A53eK78M%3D	Nő	Miskolci Egyetem		Alapképzési (Bsc)	Védőnő (Bsc)		Nappali	Első	Nem	Nem	Nem		Hetente	Igen	Igen	Nem	Google							Nyomtatott szakkönyvek	Nem		Igen	az 1.-2. évfolyamon	Nem, az angol és magyar nyelvű forrásokat egyaránt elolvasom	Haladó szintű (5)	Átlagos (3)	Átlagos (3)	Átlagos (3)	Valamennyire értek hozzá (2)	Átlagosnál jobb (4)	Értem a jelentését, és másoknak is el tudnám magyarázni	Nem ismerem a jelentését, de szeretném megismerni	Többé-kevésbé értem a jelentését	Értem a jelentését, és másoknak is el tudnám magyarázni	Nem ismerem a jelentését, de szeretném megismerni	Nem ismerem a jelentését, de szeretném megismerni	Többé-kevésbé értem a jelentését	Értem a jelentését, és másoknak is el tudnám magyarázni	Értem a jelentését, és másoknak is el tudnám magyarázni	Nem ismerem a jelentését, de szeretném megismerni	Többé-kevésbé értem a jelentését	Értem a jelentését, és másoknak is el tudnám magyarázni	Többé-kevésbé értem a jelentését
128	https://online-kerdoiv.com/index/view/hash/f505d52a49dd686dada6511e6d93f5bb/r/ogBlOYBKSSlaSSgSSlaSSDTa6mPRyMZE78GWt988lPuelSSlaSSVdibOUBSwY9lZRlvQgJij9ZXhYnhuEyhkERvS3FFn9f1oYZhwZuXN7sJWXuV2EE60IPPj9urp5pfht05UXsvcruo6J1rSSePPsZehDBSSPeSSlaSSgxyGzR4B3SfewUcqxOZdSSlaSSGRIJsgf2tZk%3D	Nő	Miskolci Egyetem		Alapképzési (Bsc)	Védőnő (Bsc)		Nappali	Második	Nem	Nem	Igen	Nem	Havonta vagy ritkábban	Igen	Igen	Igen	Google							Elektronikus folyóiratok	Nem		Igen	a 3.-4. évfolyamon	Igen, csak magyarul szeretek olvasni	Átlagos (3)	Átlagosnál jobb (4)	Átlagos (3)	Átlagos (3)	Átlagos (3)	Átlagos (3)	Többé-kevésbé értem a jelentését	Többé-kevésbé értem a jelentését	Többé-kevésbé értem a jelentését	Többé-kevésbé értem a jelentését	Többé-kevésbé értem a jelentését	Többé-kevésbé értem a jelentését	Többé-kevésbé értem a jelentését	Többé-kevésbé értem a jelentését	Többé-kevésbé értem a jelentését	Többé-kevésbé értem a jelentését	Nem ismerem a jelentését, de szerintem nem is hasznos számomra	Nem ismerem a jelentését, de szerintem nem is hasznos számomra	Nem ismerem a jelentését, de szerintem nem is hasznos számomra
129	https://online-kerdoiv.com/index/view/hash/f505d52a49dd686dada6511e6d93f5bb/r/JuQW7lP0eSrsil0wsTqxSQlZvTPPluSSbyN12ZYpd96HcwUmFu1GErSSlaSSjo1ZPPluSSgalTaF5rowlcz2LuI0hu9D39qTDYT7yvdPPluSSnm05gP2kwD2GHvgZGzo750ShPH5C0UVy9dD16D4SSePPR2NqvD0u6TOWpp1ViAMZmTaHoXN7gaT2qkiMbPLBWLM%3D	Nő	Miskolci Egyetem		Alapképzési (Bsc)	Gyógytornász (Bsc)		Nappali	Harmadik	Nem	Nem	Igen	Nem	Havonta vagy ritkábban	Igen	Igen	Nem	Pubmed/Medline							Egészségügyi szakemberek véleményének megismerése	Igen	Igen	Igen	az 1.-2. évfolyamon	Nem, sőt, olvastam már olyan forrást is, ami egyéb (nem angol vagy magyar) nyelven íródott	Átlagosnál jobb (4)	Átlagos (3)	Átlagosnál jobb (4)	Átlagosnál jobb (4)	Átlagosnál jobb (4)	Haladó szintű (5)	Értem a jelentését, és másoknak is el tudnám magyarázni	Többé-kevésbé értem a jelentését	Értem a jelentését, és másoknak is el tudnám magyarázni	Értem a jelentését, és másoknak is el tudnám magyarázni	Nincs véleményem ezzel kapcsolatos	Többé-kevésbé értem a jelentését	Nem ismerem a jelentését, de szeretném megismerni	Értem a jelentését, és másoknak is el tudnám magyarázni	Többé-kevésbé értem a jelentését	Többé-kevésbé értem a jelentését	Értem a jelentését, és másoknak is el tudnám magyarázni	Értem a jelentését, és másoknak is el tudnám magyarázni	Többé-kevésbé értem a jelentését
130	https://online-kerdoiv.com/index/view/hash/f505d52a49dd686dada6511e6d93f5bb/r/RUEP4QEgosopDnSk2wm9rpAlOuH08lbPmCxwhO93TQlpqD50tJGxST4PWPPluSSbzm6N7lLSSIfPBgofWlzs3qNshEpecHkk0fzxGzhI50po9EUWFXSwCsINQCKRWUPUdFr4cSSePPVr2e7txHvEb8GhnAivB2XTTPSSlaSSyxot6vSEKJUM2V1FUE%3D	Nő	Szegedi Tudományegetem		Alapképzési (Bsc)	Ápoló (Bsc)		Levelezős	Negyedik	Igen	Nem	Nem		Havonta vagy ritkábban	Igen	Igen	Nem	Google							Elektronikus szakkönyvek	Nem	Igen	Igen	a 3.-4. évfolyamon	Nem, az angol és magyar nyelvű forrásokat egyaránt elolvasom	Átlagos (3)	Átlagos (3)	Átlagos (3)	Gyenge (1)	Valamennyire értek hozzá (2)	Átlagos (3)	Nem ismerem a jelentését, de szeretném megismerni	Többé-kevésbé értem a jelentését	Többé-kevésbé értem a jelentését	Többé-kevésbé értem a jelentését	Nem ismerem a jelentését, de szeretném megismerni	Nem ismerem a jelentését, de szeretném megismerni	Értem a jelentését, és másoknak is el tudnám magyarázni	Többé-kevésbé értem a jelentését	Többé-kevésbé értem a jelentését	Nem ismerem a jelentését, de szeretném megismerni	Többé-kevésbé értem a jelentését	Értem a jelentését, és másoknak is el tudnám magyarázni	Többé-kevésbé értem a jelentését
131	https://online-kerdoiv.com/index/view/hash/f505d52a49dd686dada6511e6d93f5bb/r/20KDjQMkUxWQ5UUN4n98fGeCPPluSSp5e62v9vfJPdeChRUduuNMDxPjdUSs6rBOsANxf553pcw9q27SSlaSS6qpcY6VSSlaSSvmsTpwIa6TyjiCLubEGfF7NJIwSRwePAUaCe5MF5PuPXISSePP6SSlaSSMfj7KqOz3gSYyHiBBODoW4Ek7iXn6RJ3elUQxqnKk%3D	Nő	Miskolci Egyetem		Alapképzési (Bsc)	Gyógytornász (Bsc)		Nappali	Második	Nem	Nem	Nem		Havonta vagy ritkábban	Igen	Igen	Nem	Wikipedia							Nyomtatott szakkönyvek	Nem		Igen	a 3.-4. évfolyamon	Nem, az angol és magyar nyelvű forrásokat egyaránt elolvasom	Átlagosnál jobb (4)	Haladó szintű (5)	Gyenge (1)	Gyenge (1)	Gyenge (1)	Haladó szintű (5)	Többé-kevésbé értem a jelentését	Nem ismerem a jelentését, de szeretném megismerni	Értem a jelentését, és másoknak is el tudnám magyarázni	Értem a jelentését, és másoknak is el tudnám magyarázni	Nem ismerem a jelentését, de szeretném megismerni	Nem ismerem a jelentését, de szeretném megismerni	Nem ismerem a jelentését, de szeretném megismerni	Értem a jelentését, és másoknak is el tudnám magyarázni	Nem ismerem a jelentését, de szeretném megismerni	Nem ismerem a jelentését, de szeretném megismerni	Értem a jelentését, és másoknak is el tudnám magyarázni	Értem a jelentését, és másoknak is el tudnám magyarázni	Nem ismerem a jelentését, de szeretném megismerni
132	https://online-kerdoiv.com/index/view/hash/f505d52a49dd686dada6511e6d93f5bb/r/d6I8lTFuV1i6hvrI3ebHUtMuU3UdoSSlaSSoBWiF0NwzSSlaSSwjPHvLt5QnQxKSSlaSSk1oGOS6gofxYC92MLQ0FCMXJVCiwudYpJSlu9fU1RE5Kp3nKPuAyihSSlaSSh3q5xwg3nkRHwEIvh5ESSePP9UUJGG1oUme5w0KTMfb6Oji0mIRqGpGWjNyAULUYmHk%3D	Nő	Szegedi Tudományegetem		Alapképzési (Bsc)	Szociális munka (BA)		Nappali	Második	Nem	Nem	Nem		Havonta vagy ritkábban	Igen	Igen	Nem	Google							Egészségügyi szakemberek véleményének megismerése	Nem		Igen	a 3.-4. évfolyamon	Igen, csak magyarul szeretek olvasni	Átlagosnál jobb (4)	Átlagosnál jobb (4)	Valamennyire értek hozzá (2)	Gyenge (1)	Valamennyire értek hozzá (2)	Átlagos (3)	Többé-kevésbé értem a jelentését	Nem ismerem a jelentését, de szeretném megismerni	Értem a jelentését, és másoknak is el tudnám magyarázni	Értem a jelentését, és másoknak is el tudnám magyarázni	Nem ismerem a jelentését, de szeretném megismerni	Nem ismerem a jelentését, de szeretném megismerni	Értem a jelentését, és másoknak is el tudnám magyarázni	Értem a jelentését, és másoknak is el tudnám magyarázni	Többé-kevésbé értem a jelentését	Nem ismerem a jelentését, de szeretném megismerni	Többé-kevésbé értem a jelentését	Értem a jelentését, és másoknak is el tudnám magyarázni	Nem ismerem a jelentését, de szeretném megismerni
133	https://online-kerdoiv.com/index/view/hash/f505d52a49dd686dada6511e6d93f5bb/r/7vl1oHQvEeqsmicxAG3Tud4W7XSSlaSSw1a0VwJfN7PPluSSedxLmX0xW7eoIKducoE0sm2fkFp9MccIcJoP4sS9qCEi7WYQJ8YH2Yv3SgSZjYUt5jD0D1MLtxvr4GPPluSSgUb93OJTQR7SSePPBvwXSSlaSSqFnfE5JFqQMfolA7MA6sBCXPPluSS08HwjL5XIuNg9I%3D	Nő	Miskolci Egyetem		Alapképzési (Bsc)	Védőnő (Bsc)		Nappali	Második	Nem	Nem	Nem		Havonta vagy ritkábban	Igen	Igen	Igen	Google							Egészségügyi szakemberek véleményének megismerése	Igen	Igen	Igen	a 3.-4. évfolyamon	Igen, csak magyarul szeretek olvasni	Átlagosnál jobb (4)	Átlagos (3)	Valamennyire értek hozzá (2)	Gyenge (1)	Gyenge (1)	Gyenge (1)	Többé-kevésbé értem a jelentését	Többé-kevésbé értem a jelentését	Értem a jelentését, és másoknak is el tudnám magyarázni	Értem a jelentését, és másoknak is el tudnám magyarázni	Nem ismerem a jelentését, de szeretném megismerni	Nem ismerem a jelentését, de szeretném megismerni	Többé-kevésbé értem a jelentését	Értem a jelentését, és másoknak is el tudnám magyarázni	Nem ismerem a jelentését, de szeretném megismerni	Nem ismerem a jelentését, de szeretném megismerni	Nem ismerem a jelentését, de szeretném megismerni	Értem a jelentését, és másoknak is el tudnám magyarázni	Többé-kevésbé értem a jelentését
134	https://online-kerdoiv.com/index/view/hash/f505d52a49dd686dada6511e6d93f5bb/r/YOpthEpOFcNxLR78vFdjUbPPluSSUVqDmoGHNnM1qxFV57BddecXwPIRbldfOLj6xvcgYnKBASyeK5GRpMumXLlJPlwtZ0JTobsfTOEhVwEJWGjgNEK8eyibhsERkAkaD8EEpSSePP7faIBPAASSlaSS5Kc3T4z6rhEAwhENXDDa8vfiHAjQxeHUys%3D	Nő	Szegedi Tudományegetem		Alapképzési (Bsc)	Ápoló (Bsc)		Levelezős	Második	Igen	Nem	Nem		Hetente	Igen	Igen	Igen	Google							Nyomtatott szakkönyvek	Nem		Igen	a 3.-4. évfolyamon	Nem, sőt, olvastam már olyan forrást is, ami egyéb (nem angol vagy magyar) nyelven íródott	Átlagos (3)	Átlagos (3)	Átlagos (3)	Valamennyire értek hozzá (2)	Valamennyire értek hozzá (2)	Valamennyire értek hozzá (2)	Többé-kevésbé értem a jelentését	Nem ismerem a jelentését, de szeretném megismerni	Értem a jelentését, és másoknak is el tudnám magyarázni	Értem a jelentését, és másoknak is el tudnám magyarázni	Nem ismerem a jelentését, de szeretném megismerni	Nem ismerem a jelentését, de szeretném megismerni	Értem a jelentését, és másoknak is el tudnám magyarázni	Értem a jelentését, és másoknak is el tudnám magyarázni	Értem a jelentését, és másoknak is el tudnám magyarázni	Nem ismerem a jelentését, de szeretném megismerni	Értem a jelentését, és másoknak is el tudnám magyarázni	Értem a jelentését, és másoknak is el tudnám magyarázni	Többé-kevésbé értem a jelentését
135	https://online-kerdoiv.com/index/view/hash/f505d52a49dd686dada6511e6d93f5bb/r/G2PPluSSzplJTTWxsGdFQPvzMGlVG1RpJZTZ8M8Ui7MLTj2KbwcMo8cRw1Di2lTFSVVmw7rPdaWnmbSSlaSSPPluSSS65A4Q6biVdXbEQJrz31GlPPluSS3KyElufPP4jlPPluSSicpxFU5Uh1R8G3DzdSSePPjPPluSSubdJT9xiERRBItPV0kkKp0oRJvS8MjVtIeurhADw4%3D	Nő	Szegedi Tudományegetem		Alapképzési (Bsc)	Szociális munka (BA)		Levelezős	Negyedik	Igen	Nem	Igen	Nem	Havonta vagy ritkábban	Igen	Igen	Igen	Google							Nyomtatott szakkönyvek	Igen	Igen	Igen	a 3.-4. évfolyamon	Igen, csak magyarul szeretek olvasni	Átlagos (3)	Átlagosnál jobb (4)	Valamennyire értek hozzá (2)	Valamennyire értek hozzá (2)	Átlagos (3)	Átlagosnál jobb (4)	Értem a jelentését, és másoknak is el tudnám magyarázni	Többé-kevésbé értem a jelentését	Értem a jelentését, és másoknak is el tudnám magyarázni	Értem a jelentését, és másoknak is el tudnám magyarázni	Többé-kevésbé értem a jelentését	Többé-kevésbé értem a jelentését	Többé-kevésbé értem a jelentését	Nem ismerem a jelentését, de szeretném megismerni	Nem ismerem a jelentését, de szeretném megismerni	Nem ismerem a jelentését, de szeretném megismerni	Többé-kevésbé értem a jelentését	Nem ismerem a jelentését, de szeretném megismerni	Nem ismerem a jelentését, de szeretném megismerni
136	https://online-kerdoiv.com/index/view/hash/f505d52a49dd686dada6511e6d93f5bb/r/KPPluSSuegalDjpQUdv5y9G0Hgc6XDSSlaSSPPluSSZdOiGLodywg8PE86OQmPPluSS3SJc3u0x9QEHwYlsYZdupyyNcsDYNiMiw23geEcfPPluSSQ4QIdFKCCuZA0MPPluSSnnPvC1DxeEDT7M5VSWqS7U49OSSePP4yzveYqaiaRXwGTrFYWpN59ayCAPBZTqIPTADcgDOoY%3D	Nő	Miskolci Egyetem		Alapképzési (Bsc)	Egészségturizmus szervező (Bsc)		Levelezős	Harmadik	Igen	Nem	Nem		Soha	Igen	Igen	Nem	Pubmed/Medline							Elektonikus média	Nem		Igen	a 3.-4. évfolyamon	Nem, az angol és magyar nyelvű forrásokat egyaránt elolvasom	Átlagos (3)	Haladó szintű (5)	Átlagos (3)	Gyenge (1)	Valamennyire értek hozzá (2)	Átlagos (3)	Nem ismerem a jelentését, de szeretném megismerni	Nem ismerem a jelentését, de szeretném megismerni	Értem a jelentését, és másoknak is el tudnám magyarázni	Értem a jelentését, és másoknak is el tudnám magyarázni	Értem a jelentését, és másoknak is el tudnám magyarázni	Többé-kevésbé értem a jelentését	Értem a jelentését, és másoknak is el tudnám magyarázni	Értem a jelentését, és másoknak is el tudnám magyarázni	Nem ismerem a jelentését, de szeretném megismerni	Többé-kevésbé értem a jelentését	Értem a jelentését, és másoknak is el tudnám magyarázni	Értem a jelentését, és másoknak is el tudnám magyarázni	Többé-kevésbé értem a jelentését
137	https://online-kerdoiv.com/index/view/hash/f505d52a49dd686dada6511e6d93f5bb/r/FHwpY2G1LHQGTYTU1sO8MZn0jQYbNNDD5sPEzSreK3S3PPluSSXmFSdCj4LP9vTjZqizYIMO1stGG4AE3YJiEbQJOvO6oOB8tsSSlaSSqhHXapbBUnaCIvTGHxq6UMyH04QJhaExG6SSePP5JELGR0qiwwPPluSSeufls3pwpvbRSSlaSSSSlaSSPrEVmrPPluSSDgjUuQf3MI%3D	Nő	Szegedi Tudományegetem		Alapképzési (Bsc)	Gyógytornász (Bsc)		Nappali	Első	Nem	Nem	Nem		Havonta vagy ritkábban	Igen	Igen	Nem	Google							Elektronikus folyóiratok	Nem		Igen	az 1.-2. évfolyamon	Nem, az angol és magyar nyelvű forrásokat egyaránt elolvasom	Valamennyire értek hozzá (2)	Átlagos (3)	Valamennyire értek hozzá (2)	Gyenge (1)	Valamennyire értek hozzá (2)	Átlagos (3)	Többé-kevésbé értem a jelentését	Nem ismerem a jelentését, de szeretném megismerni	Értem a jelentését, és másoknak is el tudnám magyarázni	Értem a jelentését, és másoknak is el tudnám magyarázni	Nem ismerem a jelentését, de szeretném megismerni	Nem ismerem a jelentését, de szeretném megismerni	Többé-kevésbé értem a jelentését	Nem ismerem a jelentését, de szeretném megismerni	Nem ismerem a jelentését, de szeretném megismerni	Nem ismerem a jelentését, de szeretném megismerni	Nem ismerem a jelentését, de szeretném megismerni	Értem a jelentését, és másoknak is el tudnám magyarázni	Értem a jelentését, és másoknak is el tudnám magyarázni
138	https://online-kerdoiv.com/index/view/hash/f505d52a49dd686dada6511e6d93f5bb/r/5XPPluSSO9nPPluSS4hRur1zRUtyQKgG6dDkfRuhqft2aeuHtPkfXABqeAdBVFGdVNYlzMSLW2SSlaSS0IwWf3usxh7feUccH5fM9zagTZY6lBOANCxZ3kwxTBoMc6aKUi6NSSlaSSif6tIGDwc6SSePP9VrsdLjvMVE8v0WsD2Xvc5FSSlaSSAMdzavo028OIDd0LUns%3D	Nő	Miskolci Egyetem		Alapképzési (Bsc)	Védőnő (Bsc)		Levelezős	Második	Igen	Nem	Nem		Havonta vagy ritkábban	Igen	Igen	Nem	Google							Nyomtatott szakkönyvek	Nem		Igen	a 3.-4. évfolyamon	Igen, csak magyarul szeretek olvasni	Átlagosnál jobb (4)	Átlagos (3)	Átlagos (3)	Átlagos (3)	Valamennyire értek hozzá (2)	Átlagosnál jobb (4)	Többé-kevésbé értem a jelentését	Többé-kevésbé értem a jelentését	Többé-kevésbé értem a jelentését	Többé-kevésbé értem a jelentését	Nem ismerem a jelentését, de szeretném megismerni	Nem ismerem a jelentését, de szeretném megismerni	Értem a jelentését, és másoknak is el tudnám magyarázni	Nem ismerem a jelentését, de szeretném megismerni	Nem ismerem a jelentését, de szeretném megismerni	Nem ismerem a jelentését, de szeretném megismerni	Nem ismerem a jelentését, de szeretném megismerni	Többé-kevésbé értem a jelentését	Többé-kevésbé értem a jelentését
139	https://online-kerdoiv.com/index/view/hash/f505d52a49dd686dada6511e6d93f5bb/r/TPPluSSEG9zWCi8FsUAWggQ0mw9vmPPluSSojekaTblXdCBoilPPluSSyRng6KRCrwvedYZt76SSlaSSfrssYk4SSlaSSeUwciLjZpXxW1FsRYrgSSlaSSbbhdsz5aEmS9axKGTNMuuDSLSElsKZF4f0S8zlLcSSePPYMFq7fg8WGOPPluSSigpEyULW3NbWLmXrQ23oDSd48qsMHLc%3D	Nő	Debreceni Egyetem		Mesterképzési (Msc)	Egészségügyi szociális munka (Msc)		Levelezős	Első	Nem	Nem	Nem		Havonta vagy ritkábban	Igen	Igen	Nem	Google							Oktatási jegyzetek	Nem		Igen	a 3.-4. évfolyamon	Igen, csak magyarul szeretek olvasni	Valamennyire értek hozzá (2)	Valamennyire értek hozzá (2)	Valamennyire értek hozzá (2)	Gyenge (1)	Gyenge (1)	Valamennyire értek hozzá (2)	Többé-kevésbé értem a jelentését	Többé-kevésbé értem a jelentését	Többé-kevésbé értem a jelentését	Többé-kevésbé értem a jelentését	Nem ismerem a jelentését, de szeretném megismerni	Nem ismerem a jelentését, de szeretném megismerni	Többé-kevésbé értem a jelentését	Többé-kevésbé értem a jelentését	Nem ismerem a jelentését, de szeretném megismerni	Nem ismerem a jelentését, de szeretném megismerni	Többé-kevésbé értem a jelentését	Értem a jelentését, és másoknak is el tudnám magyarázni	Értem a jelentését, és másoknak is el tudnám magyarázni
140	https://online-kerdoiv.com/index/view/hash/f505d52a49dd686dada6511e6d93f5bb/r/lDufy7l2rqptUtSs94vtAxWb9sa7ZZnQU7TUPPluSSGg84wGBY0SSlaSS6cyLrigxgKhUIqKTcKPe0hkOeRnOvhydz6SSlaSSh7m4kxziJe3cRYW6SdqFsawxyJdTAm5iT6vi0mqVA7H9NlSSePPCnUCv8ZfVtrbRPyotNPPluSSSSlaSSiL4Ohta8WZT5KH7cZURfsko%3D	Nő	Szegedi Tudományegetem		Alapképzési (Bsc)	Védőnő (Bsc)		Nappali	Negyedik	Nem	Igen	Igen	Nem	Havonta vagy ritkábban	Igen	Igen	Nem	Wikipedia							Nyomtatott szakkönyvek	Igen	Nem	Igen	a 3.-4. évfolyamon	Igen, csak magyarul szeretek olvasni	Átlagos (3)	Átlagos (3)	Valamennyire értek hozzá (2)	Gyenge (1)	Valamennyire értek hozzá (2)	Átlagos (3)	Nem ismerem a jelentését, de szeretném megismerni	Nem ismerem a jelentését, de szeretném megismerni	Többé-kevésbé értem a jelentését	Értem a jelentését, és másoknak is el tudnám magyarázni	Nem ismerem a jelentését, de szeretném megismerni	Nem ismerem a jelentését, de szeretném megismerni	Többé-kevésbé értem a jelentését	Többé-kevésbé értem a jelentését	Nem ismerem a jelentését, de szeretném megismerni	Nem ismerem a jelentését, de szeretném megismerni	Nem ismerem a jelentését, de szeretném megismerni	Értem a jelentését, és másoknak is el tudnám magyarázni	Többé-kevésbé értem a jelentését
141	https://online-kerdoiv.com/index/view/hash/f505d52a49dd686dada6511e6d93f5bb/r/BrWfPPPluSSmlvBnWhOvTD8SSlaSSguHQBr5JBldiWAPPluSS9PPluSS2PPluSSrKWIMlR1E2HPnIOOBLhBPPluSSiHHSLtCyMFQd4i9AVFSSlaSSwNKM6gSQOIVJ7nnNfwn5PgYN5MS5eFSL52T5qsG7LBuRBnRHhHSSePP42m7bo47G0PPluSS1WWkXnJ70Il0fxOqM1phkholiPPluSSBryQPPluSSo%3D	Férfi	Debreceni Egyetem		Alapképzési (Bsc)	Mentőtiszt (Bsc)		Nappali	Negyedik	Nem	Nem	Nem		Havonta vagy ritkábban	Igen	Igen	Nem	Google							Nyomtatott szakkönyvek	Igen	Igen	Igen	a 3.-4. évfolyamon	Igen, csak magyarul szeretek olvasni	Átlagos (3)	Átlagosnál jobb (4)	Átlagos (3)	Átlagos (3)	Átlagos (3)	Átlagosnál jobb (4)	Nincs véleményem ezzel kapcsolatosan	Nincs véleményem ezzel kapcsolatosan	Nincs véleményem ezzel kapcsolatosan	Nincs véleményem ezzel kapcsolatosan	Nincs véleményem ezzel kapcsolatos	Nincs véleményem ezzel kapcsolatos	Értem a jelentését, és másoknak is el tudnám magyarázni	Értem a jelentését, és másoknak is el tudnám magyarázni	Értem a jelentését, és másoknak is el tudnám magyarázni	Nem ismerem a jelentését, de szeretném megismerni	Nincs véleményem ezzel kapcsolatosan	Nem ismerem a jelentését, de szerintem nem is hasznos számomra	Nincs véleményem ezzel kapcsolatosan
142	https://online-kerdoiv.com/index/view/hash/f505d52a49dd686dada6511e6d93f5bb/r/9slX4ikynXr6YV7iEXiQNunnhXxOq8g6Ez14OyPmGSSlaSS2NtPPluSSkmNfQdXjybiQMtfoN7TzmPR9NtG1JPRqqIc6ucXd9fmLZQNBE3a97maNBuaq8JvalcBStJ0Oo0dHO5b6qkSSePPMmAIpI4Vw6SmjPTDo3F9NPPluSSO2gT6SSlaSSdeS3ULwlnJqLePPluSSM%3D	Nő	Szegedi Tudományegetem		Alapképzési (Bsc)	Ápoló (Bsc)		Nappali	Első	Igen	Nem	Igen	Igen	Soha	Igen	Igen	Nem	Medscape							Egészségügyi szakemberek véleményének megismerése	Igen	Nem	Nem		Igen, csak magyarul szeretek olvasni	Haladó szintű (5)	Haladó szintű (5)	Átlagos (3)	Valamennyire értek hozzá (2)	Haladó (5)	Átlagosnál jobb (4)	Nem ismerem a jelentését, de szeretném megismerni	Nem ismerem a jelentését, de szerintem nem is hasznos számomra	Többé-kevésbé értem a jelentését	Értem a jelentését, és másoknak is el tudnám magyarázni	Többé-kevésbé értem a jelentését	Nincs véleményem ezzel kapcsolatos	Nem ismerem a jelentését, de szeretném megismerni	Értem a jelentését, és másoknak is el tudnám magyarázni	Nincs véleményem ezzel kapcsolatosan	Nem ismerem a jelentését, de szeretném megismerni	Nincs véleményem ezzel kapcsolatosan	Többé-kevésbé értem a jelentését	Nem ismerem a jelentését, de szeretném megismerni
143	https://online-kerdoiv.com/index/view/hash/f505d52a49dd686dada6511e6d93f5bb/r/wUZoOFm7plL3xDE5A0gQxm4mLhsLv9rbY8SAKmNwuA98CX6IMePVuGW4chyXdLxzvyF5TB5BE73iHEcEEIZBeL47sl945qOjF7aznZZoa2jvEyliaRjDJ8NePPluSSZPPluSS0V4vaSSePPgaSpBYncMIYC7K9cItbdPguNqUbqa4sIaKzuccgQUq4%3D	Nő	Miskolci Egyetem		Alapképzési (Bsc)	Védőnő (Bsc)		Levelezős	Második	Nem	Nem	Igen	Nem	Havonta vagy ritkábban	Nem	Igen	Nem	Pubmed/Medline							Egészségügyi szakemberek véleményének megismerése	Nem		Igen	az 1.-2. évfolyamon	Nem, az angol és magyar nyelvű forrásokat egyaránt elolvasom	Átlagosnál jobb (4)	Átlagos (3)	Átlagos (3)	Valamennyire értek hozzá (2)	Átlagos (3)	Átlagosnál jobb (4)	Többé-kevésbé értem a jelentését	Többé-kevésbé értem a jelentését	Többé-kevésbé értem a jelentését	Többé-kevésbé értem a jelentését	Nem ismerem a jelentését, de szeretném megismerni	Nem ismerem a jelentését, de szeretném megismerni	Többé-kevésbé értem a jelentését	Értem a jelentését, és másoknak is el tudnám magyarázni	Nem ismerem a jelentését, de szeretném megismerni	Nem ismerem a jelentését, de szeretném megismerni	Többé-kevésbé értem a jelentését	Többé-kevésbé értem a jelentését	Többé-kevésbé értem a jelentését
144	https://online-kerdoiv.com/index/view/hash/f505d52a49dd686dada6511e6d93f5bb/r/KOKsPPluSSSSlaSSTfSZkSbPPluSSUMQWrtnkgRa3GUse4njxOVYDNnqPPluSSf9cfZhsH9PgBegiFRrVa1g9bTZiN7RVN7oPPluSSCaBEgUJXNoGQDLyDdSSlaSSKuvyVSXgQa03Z8l2pLfVrtlCj1rLUojIWSSePP1TvPuD1CuepzQdxqSSlaSSGYfssbtoblFhE3VuJBCJCEtqbs%3D	Nő	Miskolci Egyetem		Alapképzési (Bsc)	Egészségturizmus szervező (Bsc)		Nappali	Második	Nem	Nem	Igen	Nem	Havonta vagy ritkábban	Igen	Igen	Nem		Google			Pubmed/Medline	Medscape		Egészségügyi szakemberek véleményének megismerése	Nem		Igen	az 1.-2. évfolyamon	Igen, csak magyarul szeretek olvasni	Átlagos (3)	Átlagos (3)	Valamennyire értek hozzá (2)	Átlagos (3)	Valamennyire értek hozzá (2)	Átlagosnál jobb (4)	Többé-kevésbé értem a jelentését	Többé-kevésbé értem a jelentését	Értem a jelentését, és másoknak is el tudnám magyarázni	Értem a jelentését, és másoknak is el tudnám magyarázni	Nem ismerem a jelentését, de szeretném megismerni	Nem ismerem a jelentését, de szeretném megismerni	Nem ismerem a jelentését, de szeretném megismerni	Nem ismerem a jelentését, de szeretném megismerni	Nem ismerem a jelentését, de szeretném megismerni	Nem ismerem a jelentését, de szeretném megismerni	Többé-kevésbé értem a jelentését	Többé-kevésbé értem a jelentését	Nem ismerem a jelentését, de szeretném megismerni
145	https://online-kerdoiv.com/index/view/hash/f505d52a49dd686dada6511e6d93f5bb/r/zB9rSEwOwwQjGSSlaSSnd5xko2zCnexzlA2ulM2pSHQo757G42rl48OjnzS95Y4Z2AoaGHsGaUvXGyk6ctHPx8YE6upWcfRXidn25Snx2GEw9M9QDpuzjk9nPSSlaSSKaSSlaSSRSSlaSSaARKVhSSePPRRxwpZd6i9gr04XQSSlaSSmevMSSlaSSF0zVCPPluSSwOjAsK0iZkzEPRU%3D	Nő	Miskolci Egyetem		Alapképzési (Bsc)	Egészségturizmus szervező (Bsc)		Nappali	Második	Nem	Nem	Igen	Igen	Havonta vagy ritkábban	Igen	Igen	Nem		Google	Google Scholar	Wikipedia				Egészségügyi szakemberek véleményének megismerése	Nem		Igen	az 1.-2. évfolyamon	Igen, csak magyarul szeretek olvasni	Átlagosnál jobb (4)	Átlagosnál jobb (4)	Átlagos (3)	Valamennyire értek hozzá (2)	Átlagos (3)	Átlagos (3)	Értem a jelentését, és másoknak is el tudnám magyarázni	Nem ismerem a jelentését, de szeretném megismerni	Értem a jelentését, és másoknak is el tudnám magyarázni	Értem a jelentését, és másoknak is el tudnám magyarázni	Nem ismerem a jelentését, de szeretném megismerni	Nem ismerem a jelentését, de szeretném megismerni	Nem ismerem a jelentését, de szeretném megismerni	Többé-kevésbé értem a jelentését	Nem ismerem a jelentését, de szerintem nem is hasznos számomra	Nem ismerem a jelentését, de szeretném megismerni	Többé-kevésbé értem a jelentését	Többé-kevésbé értem a jelentését	Nem ismerem a jelentését, de szeretném megismerni
146	https://online-kerdoiv.com/index/view/hash/f505d52a49dd686dada6511e6d93f5bb/r/xsuNn4L8wuPPluSSw0hKs40KmVqxWqR6eZslHzw23iW2onSSlaSSIM5fyeC3svVijxXsRlBAewOnZVh8xz2I1YPPluSSQ4lS6Mr7iPDDEH5S0GQAkYrzUyoKHq3EsJwB9yrUjj3n7SSlaSS6M2ORSSePPDkfw7oj3q0MEnPPluSSwdIELSKKir0i66fEmY83jBh0vwt3o%3D	Nő	Debreceni Egyetem		Alapképzési (Bsc)	Mentőtiszt (Bsc)		Nappali	Negyedik	Nem	Nem	Nem		Soha	Igen	Igen	Igen		Google		Wikipedia				Elektronikus szakkönyvek	Nem		Igen	a 3.-4. évfolyamon	Igen, csak magyarul szeretek olvasni	Haladó szintű (5)	Haladó szintű (5)	Gyenge (1)	Gyenge (1)	Valamennyire értek hozzá (2)	Átlagos (3)	Nem ismerem a jelentését, de szeretném megismerni	Nem ismerem a jelentését, de szeretném megismerni	Értem a jelentését, és másoknak is el tudnám magyarázni	Értem a jelentését, és másoknak is el tudnám magyarázni	Többé-kevésbé értem a jelentését	Nem ismerem a jelentését, de szeretném megismerni	Többé-kevésbé értem a jelentését	Többé-kevésbé értem a jelentését	Nem ismerem a jelentését, de szeretném megismerni	Nem ismerem a jelentését, de szeretném megismerni	Értem a jelentését, és másoknak is el tudnám magyarázni	Értem a jelentését, és másoknak is el tudnám magyarázni	Értem a jelentését, és másoknak is el tudnám magyarázni
147	https://online-kerdoiv.com/index/view/hash/f505d52a49dd686dada6511e6d93f5bb/r/ciscLBijzHTs1Z4N1DsVqECw9AnUGYOJPSduAgBcw8I3SSlaSSynSSlaSSPT8zzy0ISJjFPoeauVTnli0vXSIu94sHPPluSS7CPPluSSCQQbJkXPPluSSZltZ3NwFi2oDqm1ps8sssPPluSSalVqbeQz39SSlaSSaKKSSePPPPluSSGqkhVyFzeJNvqPPluSSCG2HxJJNAJu4t6eOYEpyO1nyfp50%3D	Férfi	Miskolci Egyetem		Alapképzési (Bsc)	Egészségturizmus szervező (Bsc)		Nappali	Második	Nem	Nem	Igen	Nem	Havonta vagy ritkábban	Igen	Igen	Igen		Google						Nyomtatott szakkönyvek	Nem		Igen	a 3.-4. évfolyamon	Nem, az angol és magyar nyelvű forrásokat egyaránt elolvasom	Átlagosnál jobb (4)	Átlagosnál jobb (4)	Átlagos (3)	Átlagos (3)	Átlagos (3)	Átlagos (3)	Értem a jelentését, és másoknak is el tudnám magyarázni	Többé-kevésbé értem a jelentését	Többé-kevésbé értem a jelentését	Többé-kevésbé értem a jelentését	Többé-kevésbé értem a jelentését	Többé-kevésbé értem a jelentését	Többé-kevésbé értem a jelentését	Nem ismerem a jelentését, de szeretném megismerni	Többé-kevésbé értem a jelentését	Többé-kevésbé értem a jelentését	Értem a jelentését, és másoknak is el tudnám magyarázni	Értem a jelentését, és másoknak is el tudnám magyarázni	Nem ismerem a jelentését, de szeretném megismerni
148	https://online-kerdoiv.com/index/view/hash/f505d52a49dd686dada6511e6d93f5bb/r/B8hjvB5gb7tkyHpQlMGwHmFYS00MTEuMPDvts75AFEGOUBSSlaSS0PPluSSSSlaSSixbIsEnz27i0kfVklZ5WL3q2kktSSlaSSs225LjE1pLnL5g3IaTsdKR2qHiGwAk3fhSSlaSSeqEbozea79vo86OwSSePPjVXjXCpDnvIxcg2RjqyHX5mOpi3fWbF7tHFUl2bJwug%3D	Nő	Gál Ferenc Főiskola		Alapképzési (Bsc)	Ápoló (Bsc)		Levelezős	Második	Igen	Nem	Nem		Hetente	Igen	Igen	Igen		Google		Wikipedia				Elektronikus szakkönyvek	Nem		Igen	a 3.-4. évfolyamon	Nem, az angol és magyar nyelvű forrásokat egyaránt elolvasom	Átlagos (3)	Átlagosnál jobb (4)	Átlagos (3)	Átlagos (3)	Valamennyire értek hozzá (2)	Átlagos (3)	Többé-kevésbé értem a jelentését	Nem ismerem a jelentését, de szeretném megismerni	Értem a jelentését, és másoknak is el tudnám magyarázni	Többé-kevésbé értem a jelentését	Többé-kevésbé értem a jelentését	Nem ismerem a jelentését, de szeretném megismerni	Nem ismerem a jelentését, de szeretném megismerni	Nem ismerem a jelentését, de szeretném megismerni	Nem ismerem a jelentését, de szeretném megismerni	Nem ismerem a jelentését, de szeretném megismerni	Nem ismerem a jelentését, de szeretném megismerni	Értem a jelentését, és másoknak is el tudnám magyarázni	Nem ismerem a jelentését, de szeretném megismerni
149	https://online-kerdoiv.com/index/view/hash/f505d52a49dd686dada6511e6d93f5bb/r/D5b5si65ue7ky1isAcNGNHy1UYlmxQREVqFSylg4HjGTnbK3RolknQYNtxlwSSlaSSSavIjS4ZLBaVt4G6Iigu9wtizlW5BaeSSlaSSmYt2G9XHg58spHVnOND76R9KOER6XKqDmD3SSePPZfTvqqxPo9AvlCAbhB36usA5CO6RavnUJEqttRWby9w%3D	Nő	Gál Ferenc Főiskola		Alapképzési (Bsc)	Ápoló (Bsc)		Levelezős	Harmadik	Nem	Nem	Nem		Naponta	Igen	Igen	Nem		Google		Wikipedia	Pubmed/Medline			Nyomtatott szakkönyvek	Nem		Igen	a 3.-4. évfolyamon	Igen, csak magyarul szeretek olvasni	Átlagos (3)	Átlagosnál jobb (4)	Átlagos (3)	Átlagosnál jobb (4)	Átlagos (3)	Átlagosnál jobb (4)	Értem a jelentését, és másoknak is el tudnám magyarázni	Értem a jelentését, és másoknak is el tudnám magyarázni	Értem a jelentését, és másoknak is el tudnám magyarázni	Értem a jelentését, és másoknak is el tudnám magyarázni	Nem ismerem a jelentését, de szeretném megismerni	Nem ismerem a jelentését, de szeretném megismerni	Többé-kevésbé értem a jelentését	Többé-kevésbé értem a jelentését	Többé-kevésbé értem a jelentését	Nem ismerem a jelentését, de szerintem nem is hasznos számomra	Értem a jelentését, és másoknak is el tudnám magyarázni	Értem a jelentését, és másoknak is el tudnám magyarázni	Értem a jelentését, és másoknak is el tudnám magyarázni
150	https://online-kerdoiv.com/index/view/hash/f505d52a49dd686dada6511e6d93f5bb/r/jnORvbkJH6iFq6bqNkQ2nx9plAxs7DnNClseNKdHbYoG6crQFIRm05x1yJXfXoRSSlaSSk7Epcr9Lwx3mh5zCMVdlJvjreE7VYeBzBYnGdkPPluSSqPPluSSH8n2YcufdVlxFX4nyLwUUS1SSePPvYxR5AcWpVZuMzr3duApbQsRPIAzJ7QGKIo8SIidXN8%3D	Nő	Gál Ferenc Főiskola		Alapképzési (Bsc)	Ápoló (Bsc)		Nappali	Második	Nem	Igen	Nem		Havonta vagy ritkábban	Igen	Igen	Nem		Google			Pubmed/Medline			Egészségügyi szakemberek véleményének megismerése	Nem		Igen	az 1.-2. évfolyamon	Igen, csak magyarul szeretek olvasni	Átlagos (3)	Átlagosnál jobb (4)	Átlagos (3)	Valamennyire értek hozzá (2)	Átlagosnál jobb (4)	Átlagos (3)	Többé-kevésbé értem a jelentését	Nem ismerem a jelentését, de szeretném megismerni	Értem a jelentését, és másoknak is el tudnám magyarázni	Többé-kevésbé értem a jelentését	Nem ismerem a jelentését, de szeretném megismerni	Nem ismerem a jelentését, de szeretném megismerni	Nem ismerem a jelentését, de szeretném megismerni	Nem ismerem a jelentését, de szeretném megismerni	Nem ismerem a jelentését, de szeretném megismerni	Nem ismerem a jelentését, de szeretném megismerni	Nem ismerem a jelentését, de szeretném megismerni	Nem ismerem a jelentését, de szeretném megismerni	Nem ismerem a jelentését, de szeretném megismerni
151	https://online-kerdoiv.com/index/view/hash/f505d52a49dd686dada6511e6d93f5bb/r/rZzUdeMfkjf34aya5Euz8OX9HiB4EAOOYvuKreZvaX9HKKfL8qKRrtEDZ6QXSbLDdjIv5mSSlaSSvScutPPluSSm4PPluSSNxhPt3VGdNIiTxErLFRx5rfPPluSSoc7TknSSlaSS1nTk19L7ImnQOdInxSSePPUFxI9wnoMLfDmPPluSSXhR9xx2fvkbkhPHhHI52FBu8gHusE%3D	Nő	Gál Ferenc Főiskola		Alapképzési (Bsc)	Ápoló (Bsc)		Levelezős	Harmadik	Nem	Igen	Nem		Hetente	Igen	Igen	Nem		Google						Nyomtatott szakkönyvek	Nem		Igen	a 3.-4. évfolyamon	Nem, sőt, olvastam már olyan forrást is, ami egyéb (nem angol vagy magyar) nyelven íródott	Átlagosnál jobb (4)	Átlagosnál jobb (4)	Átlagosnál jobb (4)	Átlagos (3)	Átlagos (3)	Átlagosnál jobb (4)	Nincs véleményem ezzel kapcsolatosan	Nincs véleményem ezzel kapcsolatosan	Nincs véleményem ezzel kapcsolatosan	Nincs véleményem ezzel kapcsolatosan	Nincs véleményem ezzel kapcsolatos	Nincs véleményem ezzel kapcsolatos	Nincs véleményem ezzel kapcsolatos	Értem a jelentését, és másoknak is el tudnám magyarázni	Értem a jelentését, és másoknak is el tudnám magyarázni	Értem a jelentését, és másoknak is el tudnám magyarázni	Értem a jelentését, és másoknak is el tudnám magyarázni	Értem a jelentését, és másoknak is el tudnám magyarázni	Értem a jelentését, és másoknak is el tudnám magyarázni
152	https://online-kerdoiv.com/index/view/hash/f505d52a49dd686dada6511e6d93f5bb/r/UtycC2K2vzRGISynG30oOkJX4f6PPluSSZP0Nz2Kc27kOtsHmIswR4LwXicMX8fzZueu2jDQVOgliVin7YSsXHphOlyMWKITwUylrnHSSlaSSq46Dwb4yUmQsnlvKIolWaAONhkGzSSlaSSSSePPDqwwdU5lUSbMPSSlaSSTSDZm3PPluSSFRLpez4jkWz2MzPpvbkGVQ%3D	Nő	Gál Ferenc Főiskola		Alapképzési (Bsc)	Ápoló (Bsc)		Nappali	Első	Igen	Nem	Nem		Hetente	Igen	Igen	Igen		Google		Wikipedia				Egészségügyi szakemberek véleményének megismerése	Nem		Igen	az 1.-2. évfolyamon	Igen, csak magyarul szeretek olvasni	Átlagosnál jobb (4)	Átlagos (3)	Átlagosnál jobb (4)	Haladó (5)	Átlagos (3)	Átlagosnál jobb (4)	Nincs véleményem ezzel kapcsolatosan	Többé-kevésbé értem a jelentését	Többé-kevésbé értem a jelentését	Értem a jelentését, és másoknak is el tudnám magyarázni	Nincs véleményem ezzel kapcsolatos	Nincs véleményem ezzel kapcsolatos	Nincs véleményem ezzel kapcsolatos	Nem ismerem a jelentését, de szeretném megismerni	Értem a jelentését, és másoknak is el tudnám magyarázni	Értem a jelentését, és másoknak is el tudnám magyarázni	Többé-kevésbé értem a jelentését	Többé-kevésbé értem a jelentését	Többé-kevésbé értem a jelentését
153	https://online-kerdoiv.com/index/view/hash/f505d52a49dd686dada6511e6d93f5bb/r/YftDLOh6qczJPPluSSZ7qTFZCr96H2fercvPPluSSC97JJLDVQSGA5kIB56FvIQ9CmYPPluSSdrJj9TzCf45ODSSlaSSytkNxxFl1kSSlaSSGudSSlaSSXNb6wPluFKjokPMYHCyzKOpZkY6k6Q1uSSlaSSsWIyPPluSScPESSePPMFH72m7dMmiv9a233QK4p8CMYVk1kSZBbqDgaiCitGI%3D	Nő	Gál Ferenc Főiskola		Alapképzési (Bsc)	Rekreációszervezés és egészségfejlesztés (Bsc)		Levelezős	Második	Igen	Nem	Igen	Igen	Hetente	Igen	Igen	Nem		Google						Egészségügyi szakemberek véleményének megismerése	Nem		Igen	az 1.-2. évfolyamon	Igen, csak magyarul szeretek olvasni	Valamennyire értek hozzá (2)	Átlagos (3)	Valamennyire értek hozzá (2)	Valamennyire értek hozzá (2)	Átlagos (3)	Átlagosnál jobb (4)	Nem ismerem a jelentését, de szeretném megismerni	Nem ismerem a jelentését, de szeretném megismerni	Nem ismerem a jelentését, de szeretném megismerni	Nem ismerem a jelentését, de szeretném megismerni	Nem ismerem a jelentését, de szeretném megismerni	Nem ismerem a jelentését, de szeretném megismerni	Nem ismerem a jelentését, de szeretném megismerni	Nem ismerem a jelentését, de szeretném megismerni	Nem ismerem a jelentését, de szeretném megismerni	Nem ismerem a jelentését, de szeretném megismerni	Nem ismerem a jelentését, de szeretném megismerni	Nem ismerem a jelentését, de szeretném megismerni	Nem ismerem a jelentését, de szeretném megismerni
154	https://online-kerdoiv.com/index/view/hash/f505d52a49dd686dada6511e6d93f5bb/r/2ucuJtPGf1Ji3fKsZ2lpHvegmwa70VGzJUCAeFN58ZweuPPluSSSSlaSSdqwzTpwSFO0Ik8i9YuPPluSS7PxWhN457MG9RudcSiMPPluSSYdlBCJB8B0ymz8bLjpgYiPPluSSKqbehpCi2URfAKQapskTSSePPRAoLIwScoF3PPluSSrv69QiMB3ZpHI046zDPnCMtfdW3JWtQ%3D	Nő	Gál Ferenc Főiskola		Mesterképzési (Msc)	Rekreációszervezés és egészségfejlesztés (Bsc)		Levelezős	Első	Igen	Nem	Nem		Havonta vagy ritkábban	Igen	Igen	Igen		Google						Elektronikus szakkönyvek	Igen	Igen	Igen	a 3.-4. évfolyamon	Nem, az angol és magyar nyelvű forrásokat egyaránt elolvasom	Átlagos (3)	Haladó szintű (5)	Átlagosnál jobb (4)	Gyenge (1)	Átlagos (3)	Haladó szintű (5)	Értem a jelentését, és másoknak is el tudnám magyarázni	Értem a jelentését, és másoknak is el tudnám magyarázni	Nem ismerem a jelentését, de szerintem nem is hasznos számomra	Nincs véleményem ezzel kapcsolatosan	Nem ismerem a jelentését, de szerintem nem is hasznos számomra	Nem ismerem a jelentését, de szerintem nem is hasznos számomra	Értem a jelentését, és másoknak is el tudnám magyarázni	Értem a jelentését, és másoknak is el tudnám magyarázni	Nem ismerem a jelentését, de szeretném megismerni	Nem ismerem a jelentését, de szeretném megismerni	Értem a jelentését, és másoknak is el tudnám magyarázni	Értem a jelentését, és másoknak is el tudnám magyarázni	Értem a jelentését, és másoknak is el tudnám magyarázni
155	https://online-kerdoiv.com/index/view/hash/f505d52a49dd686dada6511e6d93f5bb/r/R6Fb8pu9K9vYCZ3rDLPTTvjtm5sCyfiNDkLvU1A82We5WxHHNKNYSfo8FN6bSSlaSS0zfojWXPMDt3XDYM9YrvzShSSlaSSf0HD8bH0q3zEbUgIVSSlaSS2C3S7PPluSShPfT2ftEd7ynrKMPW10SSePPFi8patoAwShTP8LqXFqBDobnyoBPNmYTeq456bwUOG0%3D	Nő	Gál Ferenc Főiskola		Alapképzési (Bsc)	Ápoló (Bsc)		Levelezős	Negyedik	Igen	Nem	Nem		Havonta vagy ritkábban	Igen	Igen	Nem		Google			Pubmed/Medline			Nyomtatott szakkönyvek	Nem		Igen	az 1.-2. évfolyamon	Igen, csak magyarul szeretek olvasni	Átlagos (3)	Valamennyire értek hozzá (2)	Gyenge (1)	Gyenge (1)	Gyenge (1)	Átlagos (3)	Többé-kevésbé értem a jelentését	Többé-kevésbé értem a jelentését	Nem ismerem a jelentését, de szeretném megismerni	Többé-kevésbé értem a jelentését	Nem ismerem a jelentését, de szeretném megismerni	Nem ismerem a jelentését, de szeretném megismerni	Többé-kevésbé értem a jelentését	Nem ismerem a jelentését, de szeretném megismerni	Nem ismerem a jelentését, de szeretném megismerni	Nem ismerem a jelentését, de szeretném megismerni	Többé-kevésbé értem a jelentését	Többé-kevésbé értem a jelentését	Nem ismerem a jelentését, de szeretném megismerni
156	https://online-kerdoiv.com/index/view/hash/f505d52a49dd686dada6511e6d93f5bb/r/QPPluSSPPluSSqSSlaSS2ZnbPPluSSvPPluSSyzQCSQAK6QPPluSS7SSlaSSLg91KSREnEwW5F9GuFzzdCSrVhoIruSflI0AcD4ZPpnrp5ug7OsYYq3Tambud6lG166cTcODHDExdXVhAxJtQM3SYv1XoR2SSlaSSUK7GZAwSSePPEwUgpPPluSSM0YbgOup7IGldn1vFu2KbiyDi4aHEPPluSS6lShE6Y%3D	Nő	Gál Ferenc Főiskola		Alapképzési (Bsc)		Egészségfejlesztő mentálhigiéné	Levelezős	Első	Igen	Nem	Igen	Nem	Hetente	Igen	Igen	Nem		Google						Nyomtatott folyóiratok	Nem		Igen	az 1.-2. évfolyamon	Igen, csak magyarul szeretek olvasni	Átlagos (3)	Valamennyire értek hozzá (2)	Gyenge (1)	Gyenge (1)	Valamennyire értek hozzá (2)	Valamennyire értek hozzá (2)	Többé-kevésbé értem a jelentését	Nem ismerem a jelentését, de szeretném megismerni	Többé-kevésbé értem a jelentését	Többé-kevésbé értem a jelentését	Nem ismerem a jelentését, de szerintem nem is hasznos számomra	Nem ismerem a jelentését, de szerintem nem is hasznos számomra	Nem ismerem a jelentését, de szerintem nem is hasznos számomra	Nem ismerem a jelentését, de szerintem nem is hasznos számomra	Nem ismerem a jelentését, de szerintem nem is hasznos számomra	Nem ismerem a jelentését, de szerintem nem is hasznos számomra	Többé-kevésbé értem a jelentését	Többé-kevésbé értem a jelentését	Többé-kevésbé értem a jelentését
157	https://online-kerdoiv.com/index/view/hash/f505d52a49dd686dada6511e6d93f5bb/r/eT2KLmOSSlaSSLUx1woKa9dRkWhgjPfcdyQ7vqOrWwfoh8eCtfGv90mLzSSlaSSpnSSlaSSUtenJHZGcwYTmSSlaSSEleVwqk7dDQTJVgKPfnTxZT9UF808FMh5rg06vGfxup0beOXh6OnXTcT38SSePPXzUG39LDzPjuuZtlen1UmVv6RYo1Wi8NrPPluSSPlR3aq3Ug%3D	Nő	Gál Ferenc Főiskola		Alapképzési (Bsc)		egészségfejlesztő mentálhigiéné	Levelezős	Második	Nem	Nem	Nem		Havonta vagy ritkábban	Igen	Igen	Igen		Google						Nyomtatott szakkönyvek	Nem		Nem		Igen, csak magyarul szeretek olvasni	Valamennyire értek hozzá (2)	Átlagos (3)	Gyenge (1)	Gyenge (1)	Gyenge (1)	Gyenge (1)	Nem ismerem a jelentését, de szerintem nem is hasznos számomra	Nem ismerem a jelentését, de szerintem nem is hasznos számomra	Nem ismerem a jelentését, de szerintem nem is hasznos számomra	Nem ismerem a jelentését, de szerintem nem is hasznos számomra	Nem ismerem a jelentését, de szerintem nem is hasznos számomra	Nem ismerem a jelentését, de szerintem nem is hasznos számomra	Nem ismerem a jelentését, de szerintem nem is hasznos számomra	Nem ismerem a jelentését, de szerintem nem is hasznos számomra	Nem ismerem a jelentését, de szerintem nem is hasznos számomra	Nem ismerem a jelentését, de szerintem nem is hasznos számomra	Nem ismerem a jelentését, de szerintem nem is hasznos számomra	Nem ismerem a jelentését, de szerintem nem is hasznos számomra	Nem ismerem a jelentését, de szerintem nem is hasznos számomra
158	https://online-kerdoiv.com/index/view/hash/f505d52a49dd686dada6511e6d93f5bb/r/sPPluSSVjkqKMrJWNMB0mk8oBq3gy8m1QWAt1KEFHTaUiAKqoqILOy6Kc3IJ33N7asPPluSSHj4PPluSSgDXm6I69LwGasKbZYU2tuUBiz7GRLeSSlaSSzLLKJQb0hSA5Gd7EKivfSdYSc2ElbwgSSePPa1nLmSSlaSS1ISSlaSS5fjQH68B2ftoCkJMcyBPPluSSrOFsFfxHFL9uSSlaSS8%3D	Nő	Gál Ferenc Főiskola		Alapképzési (Bsc)	Ápoló (Bsc)		Levelezős	Negyedik	Igen	Nem	Nem		Hetente	Igen	Igen	Nem		Google						Nyomtatott szakkönyvek	Nem		Igen	az 1.-2. évfolyamon	Igen, csak magyarul szeretek olvasni	Átlagos (3)	Átlagosnál jobb (4)	Átlagos (3)	Gyenge (1)	Valamennyire értek hozzá (2)	Átlagosnál jobb (4)	Többé-kevésbé értem a jelentését	Értem a jelentését, és másoknak is el tudnám magyarázni	Többé-kevésbé értem a jelentését	Többé-kevésbé értem a jelentését	Többé-kevésbé értem a jelentését	Többé-kevésbé értem a jelentését	Többé-kevésbé értem a jelentését	Nem ismerem a jelentését, de szeretném megismerni	Nem ismerem a jelentését, de szeretném megismerni	Nem ismerem a jelentését, de szeretném megismerni	Nem ismerem a jelentését, de szeretném megismerni	Nem ismerem a jelentését, de szeretném megismerni	Nem ismerem a jelentését, de szeretném megismerni
159	https://online-kerdoiv.com/index/view/hash/f505d52a49dd686dada6511e6d93f5bb/r/3rV2rWDFXPPluSS3qfCTPzzxe59Y8tGK114FABPPluSSKxusBfq41q0YM0IoZf3GqHBjm5VcYy9ebBOGiUCxFnluoIbT2pwnhSllvQTR00pVOvED29fNzPOYvh4odRnBUcCdQGkc3wSSePPuHPwthTkFvpchuKNOWjq6FXU8iYSe1wBS8heKQdQeXY%3D	Nő	Gál Ferenc Főiskola		Mesterképzési (Msc)		Eg?szs?gfejlesztö ment?lhigienikus	Levelezős	Második	Igen	Nem	Igen	Igen	Naponta	Igen	Igen	Igen		Google		Wikipedia				Oktatási jegyzetek	Nem		Igen	az 1.-2. évfolyamon	Igen, csak magyarul szeretek olvasni	Haladó szintű (5)	Átlagosnál jobb (4)	Átlagos (3)	Átlagos (3)	Átlagos (3)	Átlagosnál jobb (4)	Többé-kevésbé értem a jelentését	Többé-kevésbé értem a jelentését	Értem a jelentését, és másoknak is el tudnám magyarázni	Értem a jelentését, és másoknak is el tudnám magyarázni	Többé-kevésbé értem a jelentését	Nem ismerem a jelentését, de szeretném megismerni	Többé-kevésbé értem a jelentését	Többé-kevésbé értem a jelentését	Nem ismerem a jelentését, de szerintem nem is hasznos számomra	Nem ismerem a jelentését, de szerintem nem is hasznos számomra	Értem a jelentését, és másoknak is el tudnám magyarázni	Értem a jelentését, és másoknak is el tudnám magyarázni	Értem a jelentését, és másoknak is el tudnám magyarázni
160	https://online-kerdoiv.com/index/view/hash/f505d52a49dd686dada6511e6d93f5bb/r/c4OXvAokJaliP1SCsOmjBvwldsJyNYgpS2bDnPPluSSj8PPluSSLKuY1vyc4XPPluSSq5Vt4bDFbNpaqmoqPPluSS54vTqZEy4OBhpjtFfeTO5lvMz2cJljA2RdIoNeVPuvrw8rBIt6iup78fwoxSSePPEXePPluSSe2PLLa1zu7E2d6hQ6mmjnwGL4v4hSSESJRBwhLU%3D	Nő	Gál Ferenc Főiskola		Alapképzési (Bsc)	Egészségturizmus szervező (Bsc)		Levelezős	Negyedik	Nem	Nem	Nem		Havonta vagy ritkábban	Igen	Igen	Nem		Google	Google Scholar					Elektonikus média	Nem		Igen	a 3.-4. évfolyamon	Igen, csak magyarul szeretek olvasni	Valamennyire értek hozzá (2)	Valamennyire értek hozzá (2)	Valamennyire értek hozzá (2)	Gyenge (1)	Gyenge (1)	Valamennyire értek hozzá (2)	Nem ismerem a jelentését, de szeretném megismerni	Nem ismerem a jelentését, de szeretném megismerni	Többé-kevésbé értem a jelentését	Többé-kevésbé értem a jelentését	Nem ismerem a jelentését, de szeretném megismerni	Nem ismerem a jelentését, de szeretném megismerni	Többé-kevésbé értem a jelentését	Nem ismerem a jelentését, de szeretném megismerni	Nem ismerem a jelentését, de szeretném megismerni	Nem ismerem a jelentését, de szeretném megismerni	Többé-kevésbé értem a jelentését	Többé-kevésbé értem a jelentését	Többé-kevésbé értem a jelentését
161	https://online-kerdoiv.com/index/view/hash/f505d52a49dd686dada6511e6d93f5bb/r/4DcKKrZmO6hd8mL1OlL4x5y8QwqQNfhGVA0QDLvjo2vIEJ9iEnGhaEoPPluSSw1klNbN0FcXVKFKnufUsHl6Y6v9xKSXNrJwPPluSSfxJUVid4S5SSlaSSMeYStgSIvLjBax9J0V9THsGFBSSePPMytPqCEWLkaT0doYHJzGWRCcXNi3CuscI3Wl4dvSSlaSSvuE%3D	Nő	Gál Ferenc Főiskola		Alapképzési (Bsc)	Ápoló (Bsc)		Levelezős	Első	Igen	Nem	Nem		Havonta vagy ritkábban	Igen	Igen	Nem		Google		Wikipedia		Medscape		Egészségügyi szakemberek véleményének megismerése	Nem		Igen	a 3.-4. évfolyamon	Igen, csak magyarul szeretek olvasni	Átlagos (3)	Átlagos (3)	Átlagos (3)	Gyenge (1)	Valamennyire értek hozzá (2)	Átlagosnál jobb (4)	Nem ismerem a jelentését, de szeretném megismerni	Nem ismerem a jelentését, de szeretném megismerni	Többé-kevésbé értem a jelentését	Többé-kevésbé értem a jelentését	Nem ismerem a jelentését, de szeretném megismerni	Nem ismerem a jelentését, de szeretném megismerni	Többé-kevésbé értem a jelentését	Nem ismerem a jelentését, de szeretném megismerni	Nem ismerem a jelentését, de szeretném megismerni	Nem ismerem a jelentését, de szeretném megismerni	Többé-kevésbé értem a jelentését	Többé-kevésbé értem a jelentését	Többé-kevésbé értem a jelentését
162	https://online-kerdoiv.com/index/view/hash/f505d52a49dd686dada6511e6d93f5bb/r/0sjqRFpmNXylbgnBWF9HhQT7M827J3x0IP3DMDieBuGgt0hnbMzlzV9NFU0ZgW7mYwjSSlaSSfc8jCD1zdXpezAgH49I5PPn1U9XvzgTN4NyoFSSlaSSwURJj4WoSxk07YacPUInjRSSePPyFR1Gkhu1QXSiZQXMjnJDPPluSSGQ1fK36iOo2LNA5K855ik%3D	Nő	Gál Ferenc Főiskola		Alapképzési (Bsc)	Szociális munka (BA)	Mentálhigiénikus	Levelezős	Második	Igen	Nem	Igen	Nem	Havonta vagy ritkábban	Igen	Igen	Nem		Google		Wikipedia				Nyomtatott szakkönyvek	Nem		Igen	az 1.-2. évfolyamon	Igen, csak magyarul szeretek olvasni	Haladó szintű (5)	Átlagosnál jobb (4)	Átlagos (3)	Valamennyire értek hozzá (2)	Átlagos (3)	Átlagos (3)	Többé-kevésbé értem a jelentését	Nem ismerem a jelentését, de szeretném megismerni	Értem a jelentését, és másoknak is el tudnám magyarázni	Értem a jelentését, és másoknak is el tudnám magyarázni	Nem ismerem a jelentését, de szeretném megismerni	Nem ismerem a jelentését, de szeretném megismerni	Értem a jelentését, és másoknak is el tudnám magyarázni	Értem a jelentését, és másoknak is el tudnám magyarázni	Nem ismerem a jelentését, de szeretném megismerni	Nem ismerem a jelentését, de szeretném megismerni	Nem ismerem a jelentését, de szeretném megismerni	Értem a jelentését, és másoknak is el tudnám magyarázni	Többé-kevésbé értem a jelentését
163	https://online-kerdoiv.com/index/view/hash/f505d52a49dd686dada6511e6d93f5bb/r/TQi5SSlaSSe45V7qrU24KLWZOsSSlaSSngo3wMipvtUzYUGHV4OqiSAsA8sAspWFiYzy6yL9mRdN51LQv11OXvt5SSlaSSuI4q6eTUWQP9RP4KqK76aRN0XANOnxovOwUKVHdTwwR4MgBCVSSePPqQ6yA6SQmZQJXkUVZ6206q32SSlaSSLLwgoDh7VdcjdgdBjo%3D	Nő	Gál Ferenc Főiskola		Mesterképzési (Msc)		Egészségfejlesztő mentálhigiéné szakirányú továbbképzés	Levelezős	Második	Nem	Igen	Igen	Igen	Naponta	Igen	Igen	Igen		Google						Nyomtatott szakkönyvek	Igen	Igen	Igen	az 1.-2. évfolyamon	Igen, csak magyarul szeretek olvasni	Átlagosnál jobb (4)	Átlagosnál jobb (4)	Átlagos (3)	Valamennyire értek hozzá (2)	Átlagosnál jobb (4)	Átlagos (3)	Értem a jelentését, és másoknak is el tudnám magyarázni	Értem a jelentését, és másoknak is el tudnám magyarázni	Értem a jelentését, és másoknak is el tudnám magyarázni	Értem a jelentését, és másoknak is el tudnám magyarázni	Nem ismerem a jelentését, de szeretném megismerni	Nem ismerem a jelentését, de szeretném megismerni	Értem a jelentését, és másoknak is el tudnám magyarázni	Értem a jelentését, és másoknak is el tudnám magyarázni	Nem ismerem a jelentését, de szeretném megismerni	Nem ismerem a jelentését, de szeretném megismerni	Nem ismerem a jelentését, de szeretném megismerni	Nem ismerem a jelentését, de szeretném megismerni	Nem ismerem a jelentését, de szeretném megismerni
164	https://online-kerdoiv.com/index/view/hash/f505d52a49dd686dada6511e6d93f5bb/r/tarfCgOWxNQ6T4BSeJZyXXB3qIq87wHAbvJdJ1kr06bVUW4pcJWLxR9SSSlaSStkr8h7iQ3D9rF9e1OoHkymYKumL0CPEQHP57PPluSSiEl2pWexPPluSS94nMucZ1SvMK2dmmEkyQXOBKOSSePPXm1ZyOOPwIgKBtJvPQ6Xhbo7S5riyB2ETgRsUKkxbx0%3D	Nő	Gál Ferenc Főiskola		Alapképzési (Bsc)		Egészségfejlesztő mentálhigiéné	Levelezős	Második	Nem	Nem	Igen	Nem	Havonta vagy ritkábban	Igen	Igen	Igen		Google			Pubmed/Medline			Egészségügyi szakemberek véleményének megismerése	Nem		Igen	az 1.-2. évfolyamon	Nem, sőt, olvastam már olyan forrást is, ami egyéb (nem angol vagy magyar) nyelven íródott	Haladó szintű (5)	Haladó szintű (5)	Átlagos (3)	Valamennyire értek hozzá (2)	Átlagos (3)	Átlagos (3)	Értem a jelentését, és másoknak is el tudnám magyarázni	Értem a jelentését, és másoknak is el tudnám magyarázni	Értem a jelentését, és másoknak is el tudnám magyarázni	Értem a jelentését, és másoknak is el tudnám magyarázni	Nem ismerem a jelentését, de szeretném megismerni	Nem ismerem a jelentését, de szeretném megismerni	Értem a jelentését, és másoknak is el tudnám magyarázni	Értem a jelentését, és másoknak is el tudnám magyarázni	Nem ismerem a jelentését, de szeretném megismerni	Értem a jelentését, és másoknak is el tudnám magyarázni	Értem a jelentését, és másoknak is el tudnám magyarázni	Értem a jelentését, és másoknak is el tudnám magyarázni	Értem a jelentését, és másoknak is el tudnám magyarázni
165	https://online-kerdoiv.com/index/view/hash/f505d52a49dd686dada6511e6d93f5bb/r/Ad4NblA9zaVkW78PUMZ6q0Bf4egJGyiuplqGwEkLXZF8YjCYQx7JYNtNqmyIYUAGS5LIPPluSSSSlaSSvZ7Yzq37PVw1cK27WPPluSSBJPPluSSqnw3Rvr6VSSlaSS5kIeVJnQSSlaSSzwzdDNOqJ03oTTi65rSSePPfFBNnKwASSlaSSAUw3wvd3oeXjSSlaSSltN1trqMY8zePZhG4SyK4%3D	Nő	Gál Ferenc Főiskola		Alapképzési (Bsc)	Ápoló (Bsc)		Levelezős	Negyedik	Igen	Nem	Igen	Igen	Hetente	Igen	Igen	Igen		Google				Medscape		Nyomtatott folyóiratok	Igen	Igen	Igen	a 3.-4. évfolyamon	Igen, csak magyarul szeretek olvasni	Valamennyire értek hozzá (2)	Valamennyire értek hozzá (2)	Valamennyire értek hozzá (2)	Gyenge (1)	Valamennyire értek hozzá (2)	Átlagos (3)	Értem a jelentését, és másoknak is el tudnám magyarázni	Nem ismerem a jelentését, de szeretném megismerni	Értem a jelentését, és másoknak is el tudnám magyarázni	Értem a jelentését, és másoknak is el tudnám magyarázni	Nem ismerem a jelentését, de szeretném megismerni	Nem ismerem a jelentését, de szeretném megismerni	Többé-kevésbé értem a jelentését	Értem a jelentését, és másoknak is el tudnám magyarázni	Többé-kevésbé értem a jelentését	Többé-kevésbé értem a jelentését	Értem a jelentését, és másoknak is el tudnám magyarázni	Értem a jelentését, és másoknak is el tudnám magyarázni	Többé-kevésbé értem a jelentését
166	https://online-kerdoiv.com/index/view/hash/f505d52a49dd686dada6511e6d93f5bb/r/t8n9PyCsM2PAsN73Jnq78eyalFVGbKDCnv5r751rfpabjDvvWU1la0HKWPPluSSL9bKYYCMhj3bNYMdUGC6H19lLPmNd95CynJofXY3NsJ2Pff2OWVA32G5TgTQUVmFPPluSS6YKLESSePPv227jPPluSSBVprInOpRqTgSUBCh02aDx72KZ6Tq08BkjLtY%3D	Nő	Gál Ferenc Főiskola		Mesterképzési (Msc)		Egészségfejlesztő mentálhigiénés szakirányú továbbképzés	Levelezős	Első	Nem	Nem	Nem		Havonta vagy ritkábban	Igen	Igen	Igen		Google	Google Scholar	Wikipedia				Nyomtatott szakkönyvek	Nem		Igen	a 3.-4. évfolyamon	Igen, csak magyarul szeretek olvasni	Átlagos (3)	Átlagos (3)	Valamennyire értek hozzá (2)	Valamennyire értek hozzá (2)	Gyenge (1)	Átlagos (3)	Nem ismerem a jelentését, de szerintem nem is hasznos számomra	Nem ismerem a jelentését, de szeretném megismerni	Többé-kevésbé értem a jelentését	Értem a jelentését, és másoknak is el tudnám magyarázni	Nincs véleményem ezzel kapcsolatos	Nem ismerem a jelentését, de szerintem nem is hasznos számomra	Nem ismerem a jelentését, de szerintem nem is hasznos számomra	Értem a jelentését, és másoknak is el tudnám magyarázni	Nem ismerem a jelentését, de szerintem nem is hasznos számomra	Nem ismerem a jelentését, de szerintem nem is hasznos számomra	Többé-kevésbé értem a jelentését	Többé-kevésbé értem a jelentését	Többé-kevésbé értem a jelentését
167	https://online-kerdoiv.com/index/view/hash/f505d52a49dd686dada6511e6d93f5bb/r/uiS3JQRNDlFte9dPKG1UXMygGpo28CuuFtgeladxPOZZ5eSXjucpJdDd5xBPDoMVxv12vFEHQkgFqhM3Cc7c7zSSlaSSqK2uY4PPluSSSZU6RoQdhfSXZcDH8PPluSS287X7DuijyfVYjnvSSePPiy9KwCcFD53LdTOU0fPPluSSaNySKVE3NPPluSSRKk5orrvAGCAoc%3D	Nő	Debreceni Egyetem		Mesterképzési (Msc)	Egészségügyi tanár (Msc)		Levelezős	Második	Igen	Nem	Igen	Igen	Havonta vagy ritkábban	Igen	Igen	Nem		Google						Elektronikus szakkönyvek	Nem		Igen	az 1.-2. évfolyamon	Igen, csak magyarul szeretek olvasni	Átlagos (3)	Átlagos (3)	Átlagos (3)	Átlagos (3)	Átlagos (3)	Átlagosnál jobb (4)	Értem a jelentését, és másoknak is el tudnám magyarázni	Nem ismerem a jelentését, de szeretném megismerni	Többé-kevésbé értem a jelentését	Többé-kevésbé értem a jelentését	Többé-kevésbé értem a jelentését	Nem ismerem a jelentését, de szeretném megismerni	Többé-kevésbé értem a jelentését	Értem a jelentését, és másoknak is el tudnám magyarázni	Értem a jelentését, és másoknak is el tudnám magyarázni	Nem ismerem a jelentését, de szeretném megismerni	Értem a jelentését, és másoknak is el tudnám magyarázni	Értem a jelentését, és másoknak is el tudnám magyarázni	Többé-kevésbé értem a jelentését
168	https://online-kerdoiv.com/index/view/hash/f505d52a49dd686dada6511e6d93f5bb/r/thNq0HMumlo352yhMBIwSSlaSS9AYdlAXraHGkSSlaSSrbzXslwlWxcmbxtmHCWSqOPGuDl72natjY17ZhBiWPPluSSXRysPPz9cKP8YxxVxPsLUK24wVQ8XebCNs9Qnt5Ird69VzRQkSSlaSS6mSSePPbKVePPluSSNM4PPluSS3kF2yDSSlaSSn9SSlaSSa87TugDkIBC4anMNmItMqnVo%3D	Nő	Gál Ferenc Főiskola		Alapképzési (Bsc)	Ápoló (Bsc)		Levelezős	Negyedik	Igen	Nem	Igen	Nem	Hetente	Igen	Igen	Nem		Google		Wikipedia				Szakmai irányelvek	Igen	Igen	Igen	a 3.-4. évfolyamon	Igen, csak magyarul szeretek olvasni	Átlagos (3)	Átlagosnál jobb (4)	Átlagosnál jobb (4)	Átlagos (3)	Átlagos (3)	Átlagos (3)	Többé-kevésbé értem a jelentését	Többé-kevésbé értem a jelentését	Többé-kevésbé értem a jelentését	Értem a jelentését, és másoknak is el tudnám magyarázni	Nem ismerem a jelentését, de szeretném megismerni	Nem ismerem a jelentését, de szeretném megismerni	Nem ismerem a jelentését, de szeretném megismerni	Nem ismerem a jelentését, de szeretném megismerni	Nem ismerem a jelentését, de szeretném megismerni	Nem ismerem a jelentését, de szeretném megismerni	Többé-kevésbé értem a jelentését	Értem a jelentését, és másoknak is el tudnám magyarázni	Értem a jelentését, és másoknak is el tudnám magyarázni
169	https://online-kerdoiv.com/index/view/hash/f505d52a49dd686dada6511e6d93f5bb/r/e8RrR9nkXVavr10ke0mXFR77DDISSlaSSSLhOIy53vYlZraq61yumSa5mjQyrPjT5dR5rotejgS5doAKYtY0MnAIGIXHha6hBSSlaSS4RMj1uP7pinFFJCXKhmB0BoDVjxYSjmFh41SSePP24HlrTCAPPPluSSLJH6RdHYETBgiI3D1RmHlfFEEjciVjX5I%3D	Nő	Gál Ferenc Főiskola		Alapképzési (Bsc)	Ápoló (Bsc)		Nappali	Első	Nem	Nem	Nem		Soha	Igen	Igen	Nem		Google		Wikipedia				Oktatási jegyzetek	Igen	Igen	Igen	a 3.-4. évfolyamon	Igen, csak magyarul szeretek olvasni	Átlagos (3)	Átlagosnál jobb (4)	Valamennyire értek hozzá (2)	Valamennyire értek hozzá (2)	Átlagos (3)	Átlagos (3)	Többé-kevésbé értem a jelentését	Nem ismerem a jelentését, de szeretném megismerni	Nem ismerem a jelentését, de szeretném megismerni	Nem ismerem a jelentését, de szeretném megismerni	Nem ismerem a jelentését, de szeretném megismerni	Nem ismerem a jelentését, de szeretném megismerni	Többé-kevésbé értem a jelentését	Nem ismerem a jelentését, de szeretném megismerni	Nem ismerem a jelentését, de szeretném megismerni	Nem ismerem a jelentését, de szeretném megismerni	Többé-kevésbé értem a jelentését	Többé-kevésbé értem a jelentését	Többé-kevésbé értem a jelentését
170	https://online-kerdoiv.com/index/view/hash/f505d52a49dd686dada6511e6d93f5bb/r/AnO6SSlaSS6CzwJFsNvQKihxISkBPPluSS1wQ7ziptPPluSSb9H911gCqVicNHShbmLQNWmbLKqkfBPhpCWIQXbRhg3lSLh3esVMEDxk3QPVjXIISkOXxi7lo80MXyZ0W9PPluSSWrtFXoSSlaSSytVALSSePP2Whj4XBoV2u2fKOifPPluSSHOHupupLEH12anLsS0fZd0U80%3D	Férfi	Gál Ferenc Főiskola		Alapképzési (Bsc)	Ápoló (Bsc)		Nappali	Első	Nem	Nem	Nem		Havonta vagy ritkábban	Igen	Igen	Igen		Google		Wikipedia				Nyomtatott szakkönyvek	Nem		Igen	az 1.-2. évfolyamon	Igen, csak magyarul szeretek olvasni	Átlagos (3)	Átlagos (3)	Valamennyire értek hozzá (2)	Valamennyire értek hozzá (2)	Valamennyire értek hozzá (2)	Valamennyire értek hozzá (2)	Nem ismerem a jelentését, de szeretném megismerni	Nem ismerem a jelentését, de szeretném megismerni	Nem ismerem a jelentését, de szeretném megismerni	Nem ismerem a jelentését, de szeretném megismerni	Nem ismerem a jelentését, de szeretném megismerni	Nem ismerem a jelentését, de szeretném megismerni	Nem ismerem a jelentését, de szeretném megismerni	Nem ismerem a jelentését, de szeretném megismerni	Nem ismerem a jelentését, de szeretném megismerni	Nem ismerem a jelentését, de szeretném megismerni	Nem ismerem a jelentését, de szeretném megismerni	Többé-kevésbé értem a jelentését	Többé-kevésbé értem a jelentését
171	https://online-kerdoiv.com/index/view/hash/f505d52a49dd686dada6511e6d93f5bb/r/18I4eIN9pI8SSlaSSvhCcktlV4HaRhGQrgf3GM730KD4NIF1O8n5Zn38MoSSlaSS2nQITaP1wvbEZPuKnQPVxVSS93LaFF2E0uMpPPluSSJfZdPPluSSHQVLUat1uM8o14SxySSlaSS7JJMIqg93GBaM6SSePPjMuV19ofhxdeUaSSlaSS8fCMmkxKp0O1m3DE49itPzn9tZOs%3D	Nő	Gál Ferenc Főiskola		Alapképzési (Bsc)	Ápoló (Bsc)		Levelezős	Második	Igen	Nem	Igen	Igen	Soha	Igen	Igen	Nem		Google						Nyomtatott szakkönyvek	Nem		Nem		Nem, az angol és magyar nyelvű forrásokat egyaránt elolvasom	Átlagos (3)	Átlagosnál jobb (4)	Átlagos (3)	Átlagos (3)	Átlagos (3)	Átlagosnál jobb (4)	Többé-kevésbé értem a jelentését	Többé-kevésbé értem a jelentését	Többé-kevésbé értem a jelentését	Többé-kevésbé értem a jelentését	Többé-kevésbé értem a jelentését	Többé-kevésbé értem a jelentését	Többé-kevésbé értem a jelentését	Többé-kevésbé értem a jelentését	Nem ismerem a jelentését, de szerintem nem is hasznos számomra	Nem ismerem a jelentését, de szerintem nem is hasznos számomra	Nem ismerem a jelentését, de szerintem nem is hasznos számomra	Többé-kevésbé értem a jelentését	Többé-kevésbé értem a jelentését
172	https://online-kerdoiv.com/index/view/hash/f505d52a49dd686dada6511e6d93f5bb/r/UPeZC0vlbDEXWQ9YYUx6PPluSSaTZAXEeWY5Zu87iosF9sVnW7CPv7XiS9GTb6iKsD7FSwyleYSSlaSSELnuJ8cMPPluSSON4Uu31hSNQHaJxWHCEwsgqLhu0SSlaSSIjRPmvVPUYqzzK3lXKy29SSePPhlJNCU5TGbuY6nijJ9kOgQpVYcpHPBhBJmgpiW7xNeI%3D	Nő	Gál Ferenc Főiskola		Alapképzési (Bsc)	Ápoló (Bsc)		Levelezős	Negyedik	Igen	Nem	Nem		Hetente	Igen	Igen	Nem		Google	Google Scholar		Pubmed/Medline			Egészségügyi szakemberek véleményének megismerése	Nem		Igen	a 3.-4. évfolyamon	Igen, csak magyarul szeretek olvasni	Átlagos (3)	Átlagos (3)	Valamennyire értek hozzá (2)	Valamennyire értek hozzá (2)	Átlagos (3)	Átlagosnál jobb (4)	Többé-kevésbé értem a jelentését	Többé-kevésbé értem a jelentését	Nem ismerem a jelentését, de szeretném megismerni	Nem ismerem a jelentését, de szeretném megismerni	Nem ismerem a jelentését, de szeretném megismerni	Nem ismerem a jelentését, de szerintem nem is hasznos számomra	Többé-kevésbé értem a jelentését	Értem a jelentését, és másoknak is el tudnám magyarázni	Nem ismerem a jelentését, de szeretném megismerni	Nem ismerem a jelentését, de szeretném megismerni	Többé-kevésbé értem a jelentését	Értem a jelentését, és másoknak is el tudnám magyarázni	Értem a jelentését, és másoknak is el tudnám magyarázni
173	https://online-kerdoiv.com/index/view/hash/f505d52a49dd686dada6511e6d93f5bb/r/wfMviJB4s9DHg9pmBMDfRxKs3KH0TbXSbzNjADZmdopq8GRJdOxu0B17vPPluSSmQbASUS0MbCWGMcpfK4nc4c0OpqVXRauacH8WUeEvj8gseVilt01TGQXqQG3PPluSSPMxeowHTsSSePP1Blh0hIcEsGXdoPPluSSL0qoaX6wXhwZg8pmzIjfNg6oJAdA%3D	Nő	Gál Ferenc Főiskola		Alapképzési (Bsc)	Ápoló (Bsc)		Levelezős	Első	Igen	Nem	Nem		Havonta vagy ritkábban	Igen	Igen	Nem		Google		Wikipedia				Egészségügyi szakemberek véleményének megismerése	Nem		Nem		Igen, csak magyarul szeretek olvasni	Valamennyire értek hozzá (2)	Valamennyire értek hozzá (2)	Gyenge (1)	Gyenge (1)	Valamennyire értek hozzá (2)	Átlagos (3)	Nincs véleményem ezzel kapcsolatosan	Nincs véleményem ezzel kapcsolatosan	Nincs véleményem ezzel kapcsolatosan	Nincs véleményem ezzel kapcsolatosan	Nincs véleményem ezzel kapcsolatos	Nincs véleményem ezzel kapcsolatos	Nincs véleményem ezzel kapcsolatos	Többé-kevésbé értem a jelentését	Nincs véleményem ezzel kapcsolatosan	Nincs véleményem ezzel kapcsolatosan	Nincs véleményem ezzel kapcsolatosan	Nincs véleményem ezzel kapcsolatosan	Nincs véleményem ezzel kapcsolatosan
174	https://online-kerdoiv.com/index/view/hash/f505d52a49dd686dada6511e6d93f5bb/r/jsPCyp22DMabUJf6disokSMtRd53iaZH9wMrWh2aYqVh53XX34tonSSlaSSjfLSSlaSSf1hCp7bFJ7q51giy0JWkeEjOpUgROZSmd1SSlaSSuKu4FQVZKzJbSSlaSSceviFxhVHizLeIfmFYCxCfSSePPbNYCv4C6VYq9gHoUkySHSuF2SyfObYs8uWREK6Z3o0M%3D	Nő	Gál Ferenc Főiskola		Alapképzési (Bsc)	Ápoló (Bsc)		Levelezős	Negyedik	Igen	Nem	Nem		Hetente	Igen	Igen	Igen		Google		Wikipedia				Egészségügyi szakemberek véleményének megismerése	Igen	Igen	Igen	az 1.-2. évfolyamon	Igen, csak magyarul szeretek olvasni	Átlagos (3)	Átlagos (3)	Átlagos (3)	Valamennyire értek hozzá (2)	Átlagos (3)	Átlagosnál jobb (4)	Többé-kevésbé értem a jelentését	Többé-kevésbé értem a jelentését	Értem a jelentését, és másoknak is el tudnám magyarázni	Értem a jelentését, és másoknak is el tudnám magyarázni	Nem ismerem a jelentését, de szeretném megismerni	Nem ismerem a jelentését, de szeretném megismerni	Többé-kevésbé értem a jelentését	Értem a jelentését, és másoknak is el tudnám magyarázni	Többé-kevésbé értem a jelentését	Többé-kevésbé értem a jelentését	Értem a jelentését, és másoknak is el tudnám magyarázni	Értem a jelentését, és másoknak is el tudnám magyarázni	Értem a jelentését, és másoknak is el tudnám magyarázni
175	https://online-kerdoiv.com/index/view/hash/f505d52a49dd686dada6511e6d93f5bb/r/CzK6PPluSSH95JfPwwoDUY8OkfpuVsM0bNDoyFFPPluSSGF2VmuPSVctxqjnHsjgsRo1h1SbxXIc9CTKYin61bWfhZkmHCvGpB2Ov5LFK2pgH1kqDkSSlaSSxRWlsCyN95HXeVSSlaSSU5fyssVgSSePPiSSlaSS7PQa4C2ghEnIj6axgZZZS2XmgCVl7pOjL5MHA4Qf8%3D	Nő	Debreceni Egyetem		Alapképzési (Bsc)	Szociális munka (BA)		Levelezős	Második	Nem	Igen	Nem		Havonta vagy ritkábban	Igen	Igen	Nem		Google						Elektronikus folyóiratok	Nem		Nem		Igen, csak magyarul szeretek olvasni	Valamennyire értek hozzá (2)	Haladó szintű (5)	Valamennyire értek hozzá (2)	Valamennyire értek hozzá (2)	Valamennyire értek hozzá (2)	Átlagos (3)	Többé-kevésbé értem a jelentését	Nincs véleményem ezzel kapcsolatosan	Nincs véleményem ezzel kapcsolatosan	Nincs véleményem ezzel kapcsolatosan	Értem a jelentését, és másoknak is el tudnám magyarázni	Nincs véleményem ezzel kapcsolatos	Értem a jelentését, és másoknak is el tudnám magyarázni	Értem a jelentését, és másoknak is el tudnám magyarázni	Nincs véleményem ezzel kapcsolatosan	Nincs véleményem ezzel kapcsolatosan	Nincs véleményem ezzel kapcsolatosan	Értem a jelentését, és másoknak is el tudnám magyarázni	Nincs véleményem ezzel kapcsolatosan
176	https://online-kerdoiv.com/index/view/hash/f505d52a49dd686dada6511e6d93f5bb/r/rjjAUEeYM453px8OYJASqry4AvdJyhtb8RXMkdps2pehEPPluSSSSlaSSqcAIQMvjzv9SCg33Zr8AHYMXU2D5bMbB29Id4xvXbX9Pbd4yHPjYGrS3fyMEUxOR7ELEo7K1C0dghYTB1SSePPlAq3ifibZNUAChjUfj9PLY656PPPluSSPPluSS6dYS9DISSlaSS8ENbLFo%3D	Nő	Gál Ferenc Főiskola		Alapképzési (Bsc)	Ápoló (Bsc)		Nappali	Második	Nem	Nem	Igen	Igen	Havonta vagy ritkábban	Nem	Igen	Nem		Google						Nyomtatott folyóiratok	Nem		Igen	a 3.-4. évfolyamon	Igen, csak magyarul szeretek olvasni	Átlagos (3)	Átlagosnál jobb (4)	Átlagos (3)	Átlagos (3)	Átlagos (3)	Átlagos (3)	Többé-kevésbé értem a jelentését	Értem a jelentését, és másoknak is el tudnám magyarázni	Értem a jelentését, és másoknak is el tudnám magyarázni	Értem a jelentését, és másoknak is el tudnám magyarázni	Értem a jelentését, és másoknak is el tudnám magyarázni	Többé-kevésbé értem a jelentését	Értem a jelentését, és másoknak is el tudnám magyarázni	Értem a jelentését, és másoknak is el tudnám magyarázni	Többé-kevésbé értem a jelentését	Értem a jelentését, és másoknak is el tudnám magyarázni	Értem a jelentését, és másoknak is el tudnám magyarázni	Értem a jelentését, és másoknak is el tudnám magyarázni	Értem a jelentését, és másoknak is el tudnám magyarázni
177	https://online-kerdoiv.com/index/view/hash/f505d52a49dd686dada6511e6d93f5bb/r/sAuQvZxjlaYHu84l99qeMSSlaSSiPPluSSoDktgbgusf7VNmEv0VTQKWqkE7D3csXNzgIISSlaSSwHKuMylwSSlaSSJ2vzuLxZcMt7X4yWSSlaSSENnu77QRuZQtM4S5WqkiKALQiG1Hw0lnlkkgFZ9enSSePPnA5KWuLBpjOqVcI2Jg9zpUlzNUCQuTqbSqzwYsKfM9o%3D	Nő	Szegedi Tudományegetem		Alapképzési (Bsc)	Gyógytornász (Bsc)		Nappali	Második	Nem	Nem	Igen	Nem	Hetente	Igen	Igen	Igen		Google						Egészségügyi szakemberek véleményének megismerése	Nem		Igen	a 3.-4. évfolyamon	Nem, az angol és magyar nyelvű forrásokat egyaránt elolvasom	Átlagos (3)	Átlagos (3)	Valamennyire értek hozzá (2)	Gyenge (1)	Átlagos (3)	Átlagosnál jobb (4)	Nem ismerem a jelentését, de szeretném megismerni	Nem ismerem a jelentését, de szeretném megismerni	Nincs véleményem ezzel kapcsolatosan	Nincs véleményem ezzel kapcsolatosan	Nincs véleményem ezzel kapcsolatos	Nincs véleményem ezzel kapcsolatos	Nincs véleményem ezzel kapcsolatos	Többé-kevésbé értem a jelentését	Nem ismerem a jelentését, de szeretném megismerni	Nem ismerem a jelentését, de szeretném megismerni	Értem a jelentését, és másoknak is el tudnám magyarázni	Értem a jelentését, és másoknak is el tudnám magyarázni	Többé-kevésbé értem a jelentését
178	https://online-kerdoiv.com/index/view/hash/f505d52a49dd686dada6511e6d93f5bb/r/OtduGKUl4zYhIo0YyR9hHphlFRnEs7y08dh4wEraS6bBPPluSSPPluSSfZyePPluSSxlP9CSfis7HjOme4pM2vWX6GdbaSSlaSSYFkoRPPluSS1hmKQChIT2qIA8eopYbHWXTYYyHk0DIfZhk278lFyqfSSePPJdwtDKliLrf3MahE5Yc1dGuAuzF5XxtxHP48APwkN5Q%3D	Nő	Szegedi Tudományegetem		Alapképzési (Bsc)	Ápoló (Bsc)		Nappali	Negyedik	Igen	Igen	Nem		Havonta vagy ritkábban	Igen	Igen	Nem		Google	Google Scholar		Pubmed/Medline			Oktatási jegyzetek	Nem		Igen	a 3.-4. évfolyamon	Nem, az angol és magyar nyelvű forrásokat egyaránt elolvasom	Haladó szintű (5)	Haladó szintű (5)	Átlagosnál jobb (4)	Átlagosnál jobb (4)	Átlagosnál jobb (4)	Valamennyire értek hozzá (2)	Értem a jelentését, és másoknak is el tudnám magyarázni	Nem ismerem a jelentését, de szeretném megismerni	Többé-kevésbé értem a jelentését	Többé-kevésbé értem a jelentését	Értem a jelentését, és másoknak is el tudnám magyarázni	Értem a jelentését, és másoknak is el tudnám magyarázni	Értem a jelentését, és másoknak is el tudnám magyarázni	Értem a jelentését, és másoknak is el tudnám magyarázni	Értem a jelentését, és másoknak is el tudnám magyarázni	Többé-kevésbé értem a jelentését	Értem a jelentését, és másoknak is el tudnám magyarázni	Értem a jelentését, és másoknak is el tudnám magyarázni	Értem a jelentését, és másoknak is el tudnám magyarázni
179	https://online-kerdoiv.com/index/view/hash/f505d52a49dd686dada6511e6d93f5bb/r/US3g5EPCpz9SSlaSSfVuG8OFYVhzYELpxfSFsdoFUiQDFhN33LTSSlaSS0cwuctNrwDLFNVqaGdsnWOdmTdi3ZuvPPluSSqSPPluSSa8dzQXQDlUMJCZZL6J0JiVII5RwcFLze4C7Ni5GwKY0tiSSSePP1NaSo2v9jXlIaynWyNZeDtC2HbADV0sajRgE4ct7Sns%3D	Nő	Gál Ferenc Főiskola		Alapképzési (Bsc)	Egészségturizmus szervező (Bsc)		Levelezős	Második	Igen	Nem	Nem		Havonta vagy ritkábban	Igen	Igen	Nem		Google		Wikipedia				Egészségügyi szakemberek véleményének megismerése	Igen	Igen	Igen	az 1.-2. évfolyamon	Igen, csak magyarul szeretek olvasni	Átlagos (3)	Átlagosnál jobb (4)	Haladó szintű (5)	Valamennyire értek hozzá (2)	Átlagosnál jobb (4)	Haladó szintű (5)	Értem a jelentését, és másoknak is el tudnám magyarázni	Nem ismerem a jelentését, de szeretném megismerni	Többé-kevésbé értem a jelentését	Értem a jelentését, és másoknak is el tudnám magyarázni	Többé-kevésbé értem a jelentését	Nem ismerem a jelentését, de szeretném megismerni	Nem ismerem a jelentését, de szeretném megismerni	Értem a jelentését, és másoknak is el tudnám magyarázni	Többé-kevésbé értem a jelentését	Nem ismerem a jelentését, de szeretném megismerni	Értem a jelentését, és másoknak is el tudnám magyarázni	Értem a jelentését, és másoknak is el tudnám magyarázni	Többé-kevésbé értem a jelentését
180	https://online-kerdoiv.com/index/view/hash/f505d52a49dd686dada6511e6d93f5bb/r/Qv6h1pzjFA2d5YS757SSlaSSthna1d84j9XlV0huuxiEnr9AXH766jUeEtJuAFfN0LTP2PPluSSZ8PNrYQPPluSSuYqyA8iWDtpmZ7PPluSSdyjOGjHCZkE9xsgplLQa8ZIU6VNLg87dcwWJjnHZSSePPoFKd4tAIs04JndGGosEhqusuzW7it9M2szhEgDIPPluSSMaY%3D	Nő	Szegedi Tudományegetem		Alapképzési (Bsc)	Ápoló (Bsc)		Nappali	Második	Nem	Nem	Igen	Igen	Havonta vagy ritkábban	Igen	Igen	Nem		Google	Google Scholar		Pubmed/Medline	Medscape		Oktatási jegyzetek	Igen	Igen	Igen	az 1.-2. évfolyamon	Nem, sőt, olvastam már olyan forrást is, ami egyéb (nem angol vagy magyar) nyelven íródott	Valamennyire értek hozzá (2)	Átlagos (3)	Átlagos (3)	Valamennyire értek hozzá (2)	Gyenge (1)	Átlagos (3)	Többé-kevésbé értem a jelentését	Többé-kevésbé értem a jelentését	Nem ismerem a jelentését, de szeretném megismerni	Értem a jelentését, és másoknak is el tudnám magyarázni	Nem ismerem a jelentését, de szeretném megismerni	Többé-kevésbé értem a jelentését	Nem ismerem a jelentését, de szeretném megismerni	Értem a jelentését, és másoknak is el tudnám magyarázni	Nem ismerem a jelentését, de szeretném megismerni	Többé-kevésbé értem a jelentését	Többé-kevésbé értem a jelentését	Többé-kevésbé értem a jelentését	Többé-kevésbé értem a jelentését
181	https://online-kerdoiv.com/index/view/hash/f505d52a49dd686dada6511e6d93f5bb/r/leo9FemLFSnLS6Y8kVsJ5FNyZadlTGHTTSAKEdfGjoLszmkICPPluSSeze8z0eksXPhPPluSSeOIxLqLSQj41bOG9SSlaSSq40LnJ02egHfjaq9Syn6MT9HjOeSQ9lEZ9RfdiGt1SSlaSSpvvy48SSePPYqYxVxtPSSlaSSYDYpnSsuWVQ3hm5SSlaSSKythEpzH3LwDSfZ1L4%3D	Nő	Szegedi Tudományegetem		Alapképzési (Bsc)	Védőnő (Bsc)		Nappali	Első	Nem	Nem	Igen	Igen	Havonta vagy ritkábban	Igen	Igen	Igen		Google		Wikipedia				Egészségügyi szakemberek véleményének megismerése	Nem		Igen	a 3.-4. évfolyamon	Igen, csak magyarul szeretek olvasni	Átlagosnál jobb (4)	Haladó szintű (5)	Átlagos (3)	Átlagos (3)	Átlagosnál jobb (4)	Haladó szintű (5)	Nem ismerem a jelentését, de szeretném megismerni	Nem ismerem a jelentését, de szeretném megismerni	Értem a jelentését, és másoknak is el tudnám magyarázni	Értem a jelentését, és másoknak is el tudnám magyarázni	Többé-kevésbé értem a jelentését	Nem ismerem a jelentését, de szeretném megismerni	Többé-kevésbé értem a jelentését	Értem a jelentését, és másoknak is el tudnám magyarázni	Értem a jelentését, és másoknak is el tudnám magyarázni	Nem ismerem a jelentését, de szeretném megismerni	Értem a jelentését, és másoknak is el tudnám magyarázni	Értem a jelentését, és másoknak is el tudnám magyarázni	Értem a jelentését, és másoknak is el tudnám magyarázni
182	https://online-kerdoiv.com/index/view/hash/f505d52a49dd686dada6511e6d93f5bb/r/HZ53er3RPPluSSUxPVfg8yJDDhV74oYRIGM0tEryHR2MGFnpBk3FUFYfCHyGO4oEmXfb4ehSSlaSSP8uO5DyoW1FBEYwz7wHgKtHv3UwT4ExxSSlaSSVDcUIZ91mHYj94QBjwGWX3oXnmPPluSSBSSePPPPluSSBNc2CMi1WfLHGC3LftDM4KFtCEEaiXhdN5GWbok0Lk%3D	Nő	Szegedi Tudományegetem		Alapképzési (Bsc)	Gyógytornász (Bsc)		Nappali	Első	Nem	Nem	Nem		Havonta vagy ritkábban	Igen	Igen	Igen		Google		Wikipedia				Elektronikus szakkönyvek	Nem		Igen	a 3.-4. évfolyamon	Nem, sőt, olvastam már olyan forrást is, ami egyéb (nem angol vagy magyar) nyelven íródott	Átlagos (3)	Átlagos (3)	Átlagos (3)	Valamennyire értek hozzá (2)	Átlagosnál jobb (4)	Átlagosnál jobb (4)	Értem a jelentését, és másoknak is el tudnám magyarázni	Nem ismerem a jelentését, de szeretném megismerni	Értem a jelentését, és másoknak is el tudnám magyarázni	Nem ismerem a jelentését, de szeretném megismerni	Nem ismerem a jelentését, de szeretném megismerni	Nem ismerem a jelentését, de szeretném megismerni	Nem ismerem a jelentését, de szeretném megismerni	Többé-kevésbé értem a jelentését	Nem ismerem a jelentését, de szeretném megismerni	Nem ismerem a jelentését, de szeretném megismerni	Többé-kevésbé értem a jelentését	Nem ismerem a jelentését, de szeretném megismerni	Nem ismerem a jelentését, de szeretném megismerni
183	https://online-kerdoiv.com/index/view/hash/f505d52a49dd686dada6511e6d93f5bb/r/CRo6MPMjSxqtlVVx470UT59hE2ltGsnygAMApvqpvqsFnygeAjZFDxxbSSlaSSEQ4hb3zLCBRb3eaSSlaSSro5Q5lX8eFBBFp3zy00U1CaIfw6Kg2cnNQUQbVv3EJKtcdeSYzP10P3SSePPUdmkiPPluSS3gnFYnaycMGtK781JNe6AFBh5srB9hulH6hv0%3D	Nő	Gál Ferenc Főiskola		Mesterképzési (Msc)	Egészségügyi szociális munka (Msc)	Eg?szs?gfejlesztő mentálhigi?n?	Levelezős	Harmadik	Nem	Nem	Igen	Igen	Havonta vagy ritkábban	Igen	Igen	Igen		Google			Pubmed/Medline			Nyomtatott szakkönyvek	Nem		Igen	a 3.-4. évfolyamon	Nem, sőt, olvastam már olyan forrást is, ami egyéb (nem angol vagy magyar) nyelven íródott	Átlagos (3)	Átlagosnál jobb (4)	Valamennyire értek hozzá (2)	Valamennyire értek hozzá (2)	Átlagos (3)	Átlagos (3)	Nem ismerem a jelentését, de szeretném megismerni	Értem a jelentését, és másoknak is el tudnám magyarázni	Értem a jelentését, és másoknak is el tudnám magyarázni	Értem a jelentését, és másoknak is el tudnám magyarázni	Nincs véleményem ezzel kapcsolatos	Nincs véleményem ezzel kapcsolatos	Nincs véleményem ezzel kapcsolatos	Többé-kevésbé értem a jelentését	Nem ismerem a jelentését, de szeretném megismerni	Nem ismerem a jelentését, de szeretném megismerni	Többé-kevésbé értem a jelentését	Többé-kevésbé értem a jelentését	Többé-kevésbé értem a jelentését
184	https://online-kerdoiv.com/index/view/hash/f505d52a49dd686dada6511e6d93f5bb/r/PPluSSArNnTky2bbhzR4mVbW8ELMFv9Y8fn5TZREwqM959YwPPluSSjYKU5Of07f3SSlaSS88GXE6Lh8J1q2DnTnMz3d3Cp8xKiMmWMLpF8PXmBPlSSlaSS3sWP1OfwFdYtXHnH6usSSlaSSOSvpO9SJeSSePP0MwInMuBjekJ6SaMgJ8WY8fZVnzHyxrQVSSlaSSF6VQ3jPAA%3D	Nő	Szegedi Tudományegetem		Alapképzési (Bsc)	Ápoló (Bsc)		Nappali	Első	Igen	Nem	Nem		Soha	Igen	Igen	Nem		Google		Wikipedia		Medscape		Oktatási jegyzetek	Nem		Igen	a 3.-4. évfolyamon	Igen, csak magyarul szeretek olvasni	Átlagos (3)	Átlagosnál jobb (4)	Valamennyire értek hozzá (2)	Gyenge (1)	Gyenge (1)	Valamennyire értek hozzá (2)	Nem ismerem a jelentését, de szeretném megismerni	Nem ismerem a jelentését, de szeretném megismerni	Többé-kevésbé értem a jelentését	Többé-kevésbé értem a jelentését	Többé-kevésbé értem a jelentését	Többé-kevésbé értem a jelentését	Többé-kevésbé értem a jelentését	Értem a jelentését, és másoknak is el tudnám magyarázni	Többé-kevésbé értem a jelentését	Többé-kevésbé értem a jelentését	Értem a jelentését, és másoknak is el tudnám magyarázni	Nem ismerem a jelentését, de szeretném megismerni	Nem ismerem a jelentését, de szeretném megismerni
185	https://online-kerdoiv.com/index/view/hash/f505d52a49dd686dada6511e6d93f5bb/r/kJ1GUwVijNiadcmfpdVuhJOmLihnTrK183U5oOESSlaSSUHPPluSSnd9t808Ntw6SDaYD5wa42zm5EAboLBvoXUvSSlaSS9tMMK34rRejJi6JWJ2PPluSS1YAe48S67CQARgTBsYJVskFITmj1BpSSePPGWl6ZxYDnzBAwCJ8BUDgKeBfmQRvHkN2OdtGdGyM7ro%3D	Nő	Szegedi Tudományegetem		Alapképzési (Bsc)	Ápoló (Bsc)		Nappali	Második	Nem	Nem	Nem		Soha	Igen	Igen	Igen		Google		Wikipedia	Pubmed/Medline			Nyomtatott szakkönyvek	Igen	Igen	Igen	az 1.-2. évfolyamon	Igen, csak magyarul szeretek olvasni	Átlagos (3)	Valamennyire értek hozzá (2)	Valamennyire értek hozzá (2)	Valamennyire értek hozzá (2)	Valamennyire értek hozzá (2)	Átlagos (3)	Értem a jelentését, és másoknak is el tudnám magyarázni	Értem a jelentését, és másoknak is el tudnám magyarázni	Értem a jelentését, és másoknak is el tudnám magyarázni	Értem a jelentését, és másoknak is el tudnám magyarázni	Értem a jelentését, és másoknak is el tudnám magyarázni	Nem ismerem a jelentését, de szerintem nem is hasznos számomra	Többé-kevésbé értem a jelentését	Értem a jelentését, és másoknak is el tudnám magyarázni	Nem ismerem a jelentését, de szeretném megismerni	Nem ismerem a jelentését, de szeretném megismerni	Többé-kevésbé értem a jelentését	Többé-kevésbé értem a jelentését	Nem ismerem a jelentését, de szeretném megismerni
186	https://online-kerdoiv.com/index/view/hash/f505d52a49dd686dada6511e6d93f5bb/r/LLYjibBwPPluSSSwD5DzpePPluSSzYPm9WTS5Sqf7crUMLU4sMQeoT2pxbxf9SvJvguoR03Bn8OjOjmIWLaJXEb45Cck6ugxsSSlaSSKTzi9Cka7hIV9tx0jfsJt3lKtg1Sznp4ue9Fw8gjSSePPrOD69Ex9VlkOw9PdOoxlr9P7b7LUe45nEC7nKDtjtos%3D	Nő	Szegedi Tudományegetem		Alapképzési (Bsc)	Ápoló (Bsc)		Nappali	Első	Nem	Nem	Nem		Havonta vagy ritkábban	Igen	Igen	Nem		Google		Wikipedia				Elektronikus szakkönyvek	Igen	Igen	Igen	a 3.-4. évfolyamon	Igen, csak magyarul szeretek olvasni	Átlagos (3)	Átlagos (3)	Valamennyire értek hozzá (2)	Gyenge (1)	Gyenge (1)	Átlagos (3)	Többé-kevésbé értem a jelentését	Többé-kevésbé értem a jelentését	Nem ismerem a jelentését, de szeretném megismerni	Nem ismerem a jelentését, de szeretném megismerni	Többé-kevésbé értem a jelentését	Nem ismerem a jelentését, de szeretném megismerni	Nem ismerem a jelentését, de szeretném megismerni	Nem ismerem a jelentését, de szeretném megismerni	Nem ismerem a jelentését, de szeretném megismerni	Nem ismerem a jelentését, de szeretném megismerni	Nem ismerem a jelentését, de szeretném megismerni	Nem ismerem a jelentését, de szeretném megismerni	Nem ismerem a jelentését, de szeretném megismerni
187	https://online-kerdoiv.com/index/view/hash/f505d52a49dd686dada6511e6d93f5bb/r/ZxrFmILGD23ojdALNpzZiqdIOhPc6ZI82X5DuYTnWOBkKy4TweE3XMtyWxz3lhRPPluSScB6B6khaBmZJHj2fGIHEv3DSSlaSSaOMhQId4iGHq7D7857ASLrQkBWtHYinalm0WOeE1SSePP8PPSSlaSSz5r5raQ07RseLG5YpmEqhmwDBgegQQIUPSYuwPQ%3D	Nő	Szegedi Tudományegetem		Alapképzési (Bsc)	Védőnő (Bsc)		Nappali	Első	Nem	Nem	Igen	Igen	Hetente	Igen	Igen	Igen		Google		Wikipedia				Egészségügyi szakemberek véleményének megismerése	Nem		Igen	az 1.-2. évfolyamon	Igen, csak magyarul szeretek olvasni	Átlagosnál jobb (4)	Átlagosnál jobb (4)	Átlagos (3)	Átlagos (3)	Átlagos (3)	Átlagosnál jobb (4)	Többé-kevésbé értem a jelentését	Többé-kevésbé értem a jelentését	Értem a jelentését, és másoknak is el tudnám magyarázni	Értem a jelentését, és másoknak is el tudnám magyarázni	Többé-kevésbé értem a jelentését	Többé-kevésbé értem a jelentését	Értem a jelentését, és másoknak is el tudnám magyarázni	Értem a jelentését, és másoknak is el tudnám magyarázni	Értem a jelentését, és másoknak is el tudnám magyarázni	Többé-kevésbé értem a jelentését	Értem a jelentését, és másoknak is el tudnám magyarázni	Többé-kevésbé értem a jelentését	Többé-kevésbé értem a jelentését
188	https://online-kerdoiv.com/index/view/hash/f505d52a49dd686dada6511e6d93f5bb/r/0KLEoSSlaSSbPPluSSiaTrJehreUnoLrm0OpY8QmSyuCjAUi1lCQwtZK2iTgTF9zwrU24bbkvHZVfU5jxQ7L6OwtCsgIK9tPPluSS8FNdRifpPPluSSss76XedjCgLAosszIUXFCarVOBfcGHOzZSSePPc2VPKAQ70rBbV4y4XQZ4ivunBbfU7quqhs50oT1w6fY%3D	Nő	Szegedi Tudományegetem		Alapképzési (Bsc)	Gyógytornász (Bsc)		Nappali	Harmadik	Nem	Nem	Nem		Havonta vagy ritkábban	Igen	Igen	Nem		Google	Google Scholar	Wikipedia	Pubmed/Medline	Medscape		Nyomtatott szakkönyvek	Nem	Igen	Igen	a 3.-4. évfolyamon	Nem, az angol és magyar nyelvű forrásokat egyaránt elolvasom	Átlagos (3)	Átlagos (3)	Valamennyire értek hozzá (2)	Átlagos (3)	Átlagos (3)	Átlagosnál jobb (4)	Értem a jelentését, és másoknak is el tudnám magyarázni	Többé-kevésbé értem a jelentését	Értem a jelentését, és másoknak is el tudnám magyarázni	Értem a jelentését, és másoknak is el tudnám magyarázni	Nem ismerem a jelentését, de szeretném megismerni	Nem ismerem a jelentését, de szeretném megismerni	Értem a jelentését, és másoknak is el tudnám magyarázni	Értem a jelentését, és másoknak is el tudnám magyarázni	Nem ismerem a jelentését, de szeretném megismerni	Nem ismerem a jelentését, de szeretném megismerni	Értem a jelentését, és másoknak is el tudnám magyarázni	Értem a jelentését, és másoknak is el tudnám magyarázni	Többé-kevésbé értem a jelentését
189	https://online-kerdoiv.com/index/view/hash/f505d52a49dd686dada6511e6d93f5bb/r/ZvwqqiSv1ON7e26cobEWPTThd7BNX9mxGi15fESSlaSSlw657cpkjelB0Yar5xrSgsbHkisymCkRPPluSSsz9Q3PPDjSSlaSSfQ8IShuku4fD5RhjS7dL1JfyZWyDaHz74qmR1jQweSWom8SSePPOaLAI4UZbeGzDqkw5Z13uX9wsIBPHMi05mMSSlaSSPPUPHMo%3D	Nő	Szegedi Tudományegetem		Alapképzési (Bsc)	Ápoló (Bsc)		Nappali	Második	Nem	Nem	Igen	Nem	Havonta vagy ritkábban	Igen	Igen	Nem		Google		Wikipedia	Pubmed/Medline	Medscape		Nyomtatott szakkönyvek	Nem		Igen	a 3.-4. évfolyamon	Igen, csak magyarul szeretek olvasni	Átlagosnál jobb (4)	Haladó szintű (5)	Valamennyire értek hozzá (2)	Valamennyire értek hozzá (2)	Átlagosnál jobb (4)	Átlagosnál jobb (4)	Nincs véleményem ezzel kapcsolatosan	Nem ismerem a jelentését, de szerintem nem is hasznos számomra	Nincs véleményem ezzel kapcsolatosan	Értem a jelentését, és másoknak is el tudnám magyarázni	Nincs véleményem ezzel kapcsolatos	Értem a jelentését, és másoknak is el tudnám magyarázni	Nincs véleményem ezzel kapcsolatos	Értem a jelentését, és másoknak is el tudnám magyarázni	Nincs véleményem ezzel kapcsolatosan	Nincs véleményem ezzel kapcsolatosan	Nem ismerem a jelentését, de szeretném megismerni	Értem a jelentését, és másoknak is el tudnám magyarázni	Értem a jelentését, és másoknak is el tudnám magyarázni
190	https://online-kerdoiv.com/index/view/hash/f505d52a49dd686dada6511e6d93f5bb/r/jfR3awiEbr6FBB32mM6aTBlRh7EQZYnnWVwc9FzFASSlaSSOyoT866PwXdviwg946VOv2Vv8HMZ7E7XcAaXWiQ5akx2NHk44dS87SaXrfPTMlZKkzBnKVvemkH9A5cJ5cqx07SSePPqBaHaEtEODyAZjZPPluSSlVmGsvSSlaSS2MkCXr3zWip7YKEq7Woo%3D	Férfi	Szegedi Tudományegetem		Alapképzési (Bsc)	Ápoló (Bsc)		Nappali	Második	Nem	Nem	Nem		Havonta vagy ritkábban	Igen	Igen	Igen					Pubmed/Medline			Nyomtatott szakkönyvek	Nem		Igen	az 1.-2. évfolyamon	Nem, az angol és magyar nyelvű forrásokat egyaránt elolvasom	Átlagosnál jobb (4)	Valamennyire értek hozzá (2)	Valamennyire értek hozzá (2)	Gyenge (1)	Átlagos (3)	Haladó szintű (5)	Nem ismerem a jelentését, de szeretném megismerni	Nem ismerem a jelentését, de szeretném megismerni	Értem a jelentését, és másoknak is el tudnám magyarázni	Értem a jelentését, és másoknak is el tudnám magyarázni	Nem ismerem a jelentését, de szeretném megismerni	Nem ismerem a jelentését, de szerintem nem is hasznos számomra	Értem a jelentését, és másoknak is el tudnám magyarázni	Értem a jelentését, és másoknak is el tudnám magyarázni	Értem a jelentését, és másoknak is el tudnám magyarázni	Értem a jelentését, és másoknak is el tudnám magyarázni	Értem a jelentését, és másoknak is el tudnám magyarázni	Értem a jelentését, és másoknak is el tudnám magyarázni	Értem a jelentését, és másoknak is el tudnám magyarázni
191	https://online-kerdoiv.com/index/view/hash/f505d52a49dd686dada6511e6d93f5bb/r/PJYletaiXbHtCt0R3EaqlHM5MXOcT5DztFFCklaiazRBPlpqc9huaa3SSlaSSc7fSsJaTNtU53Ihct9qgTvvxPDsLecMkKtuYIZYTZU0WUk7mYrQIlfFltPPluSSqCFfXntZvy8cVeSSePPD8DSSSlaSS3g3BhGnREChJY89EKagMqOWijZCGOopKEe1luQ%3D	Nő	Szegedi Tudományegetem		Alapképzési (Bsc)	Ápoló (Bsc)		Levelezős	Második	Igen	Nem	Igen	Nem	Havonta vagy ritkábban	Igen	Igen	Igen		Google		Wikipedia	Pubmed/Medline	Medscape		Nyomtatott szakkönyvek	Nem		Igen	a 3.-4. évfolyamon	Igen, csak magyarul szeretek olvasni	Átlagosnál jobb (4)	Haladó szintű (5)	Átlagos (3)	Valamennyire értek hozzá (2)	Valamennyire értek hozzá (2)	Átlagos (3)	Nem ismerem a jelentését, de szeretném megismerni	Nem ismerem a jelentését, de szeretném megismerni	Többé-kevésbé értem a jelentését	Értem a jelentését, és másoknak is el tudnám magyarázni	Többé-kevésbé értem a jelentését	Nem ismerem a jelentését, de szeretném megismerni	Nem ismerem a jelentését, de szeretném megismerni	Értem a jelentését, és másoknak is el tudnám magyarázni	Nem ismerem a jelentését, de szeretném megismerni	Nem ismerem a jelentését, de szeretném megismerni	Nem ismerem a jelentését, de szeretném megismerni	Értem a jelentését, és másoknak is el tudnám magyarázni	Többé-kevésbé értem a jelentését
192	https://online-kerdoiv.com/index/view/hash/f505d52a49dd686dada6511e6d93f5bb/r/lPzPPluSSql6u52FlB9dasjpUczgP8M52u8oqB5nUJjUOH3VxIZ5TB2oYLL4pF7vXDMV3kt8CsiX8Ea1tMJt3wDwXVIE9nbMapjfSGLWnyq9c0j4ovWGMEEFXqauHOaerNk7eSSePPrwJU3o54jQWotZyPnNglPwWVE9NlPDmbGfHabiLnuc8%3D	Nő	Szegedi Tudományegetem		Alapképzési (Bsc)	Ápoló (Bsc)		Nappali	Első	Nem	Nem	Nem		Hetente	Igen	Igen	Nem		Google		Wikipedia				Egészségügyi szakemberek véleményének megismerése	Nem		Igen	a 3.-4. évfolyamon	Igen, csak magyarul szeretek olvasni	Átlagosnál jobb (4)	Haladó szintű (5)	Valamennyire értek hozzá (2)	Valamennyire értek hozzá (2)	Valamennyire értek hozzá (2)	Átlagos (3)	Nem ismerem a jelentését, de szeretném megismerni	Nem ismerem a jelentését, de szeretném megismerni	Többé-kevésbé értem a jelentését	Többé-kevésbé értem a jelentését	Többé-kevésbé értem a jelentését	Nem ismerem a jelentését, de szeretném megismerni	Többé-kevésbé értem a jelentését	Többé-kevésbé értem a jelentését	Nem ismerem a jelentését, de szeretném megismerni	Nem ismerem a jelentését, de szeretném megismerni	Többé-kevésbé értem a jelentését	Értem a jelentését, és másoknak is el tudnám magyarázni	Értem a jelentését, és másoknak is el tudnám magyarázni
193	https://online-kerdoiv.com/index/view/hash/f505d52a49dd686dada6511e6d93f5bb/r/89YPPluSSt8AmPPihh5YRiCZMuKVDwdRFr09QpZVxHSSlaSSEGyxTFCYD9sXpQSdeoS4oPPluSSb9f6ReXNlDzB8trtHXOAvPKXAuY2TSOi1dUSaafkPOOSSlaSSUs0a6D5xQjwklf4fbQ6GokIqSSePPE3SWxXpGirq31Q3ix7SSlaSSwtQHXoBJftG8y6TQRDmkZ30s%3D	Férfi	Szegedi Tudományegetem		Alapképzési (Bsc)		Dentálhigiénikus (Bsc)	Nappali	Harmadik	Nem	Nem	Igen	Igen	Hetente	Igen	Igen	Nem		Google		Wikipedia	Pubmed/Medline		Cochrane Library	Elektronikus folyóiratok	Igen	Igen	Igen	a 3.-4. évfolyamon	Igen, csak angolul szeretek olvasni	Átlagos (3)	Valamennyire értek hozzá (2)	Átlagosnál jobb (4)	Átlagosnál jobb (4)	Átlagosnál jobb (4)	Átlagosnál jobb (4)	Értem a jelentését, és másoknak is el tudnám magyarázni	Többé-kevésbé értem a jelentését	Többé-kevésbé értem a jelentését	Értem a jelentését, és másoknak is el tudnám magyarázni	Nem ismerem a jelentését, de szeretném megismerni	Nem ismerem a jelentését, de szeretném megismerni	Többé-kevésbé értem a jelentését	Nem ismerem a jelentését, de szeretném megismerni	Értem a jelentését, és másoknak is el tudnám magyarázni	Többé-kevésbé értem a jelentését	Értem a jelentését, és másoknak is el tudnám magyarázni	Értem a jelentését, és másoknak is el tudnám magyarázni	Többé-kevésbé értem a jelentését
194	https://online-kerdoiv.com/index/view/hash/f505d52a49dd686dada6511e6d93f5bb/r/jH8OnZIQ5PPluSSwZTov8Ccts6QXSSlaSS6DmmqgsCV3rYLSSlaSS3gYqiwXyGlxEPPbcSSlaSSIPPluSSQa9kFJuQ8MHlrJzpSboyMcTGEthuN0gYmZfJ1Y8SSlaSSxocw4MMKapvYRfwuh6FSAi1KgA2b5S8SSePPn98MuIKjigPPluSSE4ye1PPluSSCE4U8kG8QBRPUXGBgkz7uTGuDU%3D	Nő	Gál Ferenc Főiskola		Alapképzési (Bsc)	Ápoló (Bsc)		Levelezős	Harmadik	Igen	Nem	Nem		Havonta vagy ritkábban	Igen	Igen	Igen		Google						Egészségügyi szakemberek véleményének megismerése	Igen	Igen	Igen	a 3.-4. évfolyamon	Igen, csak magyarul szeretek olvasni	Átlagos (3)	Átlagosnál jobb (4)	Valamennyire értek hozzá (2)	Valamennyire értek hozzá (2)	Átlagos (3)	Átlagos (3)	Értem a jelentését, és másoknak is el tudnám magyarázni	Többé-kevésbé értem a jelentését	Értem a jelentését, és másoknak is el tudnám magyarázni	Értem a jelentését, és másoknak is el tudnám magyarázni	Többé-kevésbé értem a jelentését	Többé-kevésbé értem a jelentését	Többé-kevésbé értem a jelentését	Értem a jelentését, és másoknak is el tudnám magyarázni	Többé-kevésbé értem a jelentését	Értem a jelentését, és másoknak is el tudnám magyarázni	Értem a jelentését, és másoknak is el tudnám magyarázni	Értem a jelentését, és másoknak is el tudnám magyarázni	Értem a jelentését, és másoknak is el tudnám magyarázni
195	https://online-kerdoiv.com/index/view/hash/f505d52a49dd686dada6511e6d93f5bb/r/qpGNAt88MUE9626kKQqOBYSwRXkHmoGxY0Zq3GLyLlFSW0XlPPluSSRqqfPPluSSFdS5Pbug9sqBRckMFwNM5HCvTJ2ba0Kx92tZMBc4nWvBMXoCoqeIWTE7pFigOgwI36M1AEeXp9SSePPfrGutrAuBgSpkVBc5QPPluSSuJbhJhzG0diKrDeu5LrJPZYU%3D	Nő	Debreceni Egyetem		Alapképzési (Bsc)	Ápoló (Bsc)		Levelezős	Első	Nem	Nem	Nem		Hetente	Igen	Igen	Nem					Pubmed/Medline			Elektronikus szakkönyvek	Nem		Igen	a 3.-4. évfolyamon	Nem, az angol és magyar nyelvű forrásokat egyaránt elolvasom	Átlagos (3)	Átlagosnál jobb (4)	Valamennyire értek hozzá (2)	Átlagos (3)	Átlagos (3)	Átlagosnál jobb (4)	Értem a jelentését, és másoknak is el tudnám magyarázni	Nem ismerem a jelentését, de szeretném megismerni	Nem ismerem a jelentését, de szeretném megismerni	Értem a jelentését, és másoknak is el tudnám magyarázni	Nem ismerem a jelentését, de szeretném megismerni	Többé-kevésbé értem a jelentését	Értem a jelentését, és másoknak is el tudnám magyarázni	Többé-kevésbé értem a jelentését	Többé-kevésbé értem a jelentését	Többé-kevésbé értem a jelentését	Értem a jelentését, és másoknak is el tudnám magyarázni	Értem a jelentését, és másoknak is el tudnám magyarázni	Értem a jelentését, és másoknak is el tudnám magyarázni
196	https://online-kerdoiv.com/index/view/hash/f505d52a49dd686dada6511e6d93f5bb/r/JnLTPMyvNeXJm2PPluSSdGShjiaokpkDJWI93cIM53PPUYKTg4rSNi9xBM1PyohXijqw19SSlaSSkGvo6ifqN9kgLK8s6aKB5TswhbLVtYQGV7zsxIGiCDVjbn6vpmBgSSlaSSHS4oHNycQSSePPrjWHLGEUUAiOQO7XrIbCy8b23PPluSStsKYoxu2LKqv7UGb0%3D	Nő	Szegedi Tudományegetem		Alapképzési (Bsc)	Védőnő (Bsc)		Nappali	Harmadik	Nem	Nem	Igen	Nem	Havonta vagy ritkábban	Igen	Igen	Nem		Google						Elektronikus szakkönyvek	Nem		Igen	a 3.-4. évfolyamon	Igen, csak magyarul szeretek olvasni	Átlagos (3)	Átlagos (3)	Valamennyire értek hozzá (2)	Valamennyire értek hozzá (2)	Átlagos (3)	Haladó szintű (5)	Értem a jelentését, és másoknak is el tudnám magyarázni	Nem ismerem a jelentését, de szeretném megismerni	Értem a jelentését, és másoknak is el tudnám magyarázni	Értem a jelentését, és másoknak is el tudnám magyarázni	Nem ismerem a jelentését, de szeretném megismerni	Nem ismerem a jelentését, de szeretném megismerni	Értem a jelentését, és másoknak is el tudnám magyarázni	Értem a jelentését, és másoknak is el tudnám magyarázni	Nem ismerem a jelentését, de szeretném megismerni	Nem ismerem a jelentését, de szeretném megismerni	Értem a jelentését, és másoknak is el tudnám magyarázni	Értem a jelentését, és másoknak is el tudnám magyarázni	Értem a jelentését, és másoknak is el tudnám magyarázni
197	https://online-kerdoiv.com/index/view/hash/f505d52a49dd686dada6511e6d93f5bb/r/mR57B2FIp1QEWRsWRQ6mYE4QBQdOIB603m6AQy6VB8ItiPJ1nXe0PK3NJmeKCyR8m4i4m6Vy3NSqJzZdq7S6pIix6Cj7HXd0m31pWbymZYslFdrKRRfqINNl7vWtIPPPluSS6SSePPr50RyJRRpkm1lSJDNA1mmM50WsHPQb2zlAQxOsTq9QM%3D	Nő	Szegedi Tudományegetem		Alapképzési (Bsc)		Dentálhigiénia (Bsc)	Nappali	Negyedik	Nem	Igen	Igen	Nem	Havonta vagy ritkábban	Igen	Igen	Nem		Google	Google Scholar		Pubmed/Medline			Elektronikus folyóiratok	Igen	Igen	Igen	a 3.-4. évfolyamon	Nem, az angol és magyar nyelvű forrásokat egyaránt elolvasom	Átlagosnál jobb (4)	Átlagos (3)	Átlagos (3)	Átlagosnál jobb (4)	Átlagos (3)	Átlagos (3)	Többé-kevésbé értem a jelentését	Nem ismerem a jelentését, de szeretném megismerni	Értem a jelentését, és másoknak is el tudnám magyarázni	Értem a jelentését, és másoknak is el tudnám magyarázni	Értem a jelentését, és másoknak is el tudnám magyarázni	Többé-kevésbé értem a jelentését	Értem a jelentését, és másoknak is el tudnám magyarázni	Értem a jelentését, és másoknak is el tudnám magyarázni	Értem a jelentését, és másoknak is el tudnám magyarázni	Többé-kevésbé értem a jelentését	Értem a jelentését, és másoknak is el tudnám magyarázni	Értem a jelentését, és másoknak is el tudnám magyarázni	Többé-kevésbé értem a jelentését
198	https://online-kerdoiv.com/index/view/hash/f505d52a49dd686dada6511e6d93f5bb/r/Ub6Bo57GYKEmIJllGBB2LxFn0IScvCGrZMgoQSRexvKTjdbuF91UocIs1JQFabbwTqUJSSlaSS8JOsk9qyID1ANPPluSSf7tdzlBPcDyLZVX8iPlCeWtceKMRKP19R6nExuEBzfACoSSePPz9Mb2j3SSlaSSaKnvOoxWg3KqvR4FQ2s5h6zpr7MlPI0KGR8%3D	Nő	Szegedi Tudományegetem		Alapképzési (Bsc)		Dentálhigiénikus (Bsc)	Nappali	Második	Nem	Nem	Nem		Havonta vagy ritkábban	Igen	Igen	Igen		Google	Google Scholar	Wikipedia				Nyomtatott szakkönyvek	Nem		Igen	a 3.-4. évfolyamon	Igen, csak magyarul szeretek olvasni	Átlagos (3)	Átlagosnál jobb (4)	Gyenge (1)	Valamennyire értek hozzá (2)	Valamennyire értek hozzá (2)	Átlagos (3)	Nem ismerem a jelentését, de szeretném megismerni	Nem ismerem a jelentését, de szeretném megismerni	Többé-kevésbé értem a jelentését	Többé-kevésbé értem a jelentését	Többé-kevésbé értem a jelentését	Nem ismerem a jelentését, de szerintem nem is hasznos számomra	Nem ismerem a jelentését, de szeretném megismerni	Többé-kevésbé értem a jelentését	Többé-kevésbé értem a jelentését	Nem ismerem a jelentését, de szerintem nem is hasznos számomra	Többé-kevésbé értem a jelentését	Többé-kevésbé értem a jelentését	Nem ismerem a jelentését, de szeretném megismerni
199	https://online-kerdoiv.com/index/view/hash/f505d52a49dd686dada6511e6d93f5bb/r/ima3AUPt3igrMjizbIzn8FN6zBy8qbUcVFhd7OSiEyCst5Hm1izZC1PPluSSRLmquDNRZT4R5n0jc1Fyt496CrbERVq3fHtreVtCRoab7K1CuuJ1YiasMxxPeIWCWvEMuqenYSSePPYOaUdOzK0TpPPluSS7JbT7qrw5j2SKCSeu1ZOJk01K94ddpQ%3D	Nő	Gál Ferenc Főiskola		Alapképzési (Bsc)	Ápoló (Bsc)		Levelezős	Első	Igen	Nem	Nem		Havonta vagy ritkábban	Igen	Igen	Nem		Google		Wikipedia				Elektonikus média	Nem		Igen	a 3.-4. évfolyamon	Igen, csak magyarul szeretek olvasni	Átlagos (3)	Átlagosnál jobb (4)	Átlagos (3)	Valamennyire értek hozzá (2)	Valamennyire értek hozzá (2)	Átlagos (3)	Nem ismerem a jelentését, de szeretném megismerni	Nem ismerem a jelentését, de szeretném megismerni	Többé-kevésbé értem a jelentését	Többé-kevésbé értem a jelentését	Többé-kevésbé értem a jelentését	Nem ismerem a jelentését, de szeretném megismerni	Nem ismerem a jelentését, de szeretném megismerni	Többé-kevésbé értem a jelentését	Nem ismerem a jelentését, de szeretném megismerni	Nem ismerem a jelentését, de szeretném megismerni	Többé-kevésbé értem a jelentését	Többé-kevésbé értem a jelentését	Nem ismerem a jelentését, de szeretném megismerni
200	https://online-kerdoiv.com/index/view/hash/f505d52a49dd686dada6511e6d93f5bb/r/O8yF3SErhktujvozU6ReAgHvr9MSlPPluSSavn11w9l1V1qNSSlaSSPjj1y4DYVV7flmCtv8KlSSlaSSZU0oWZvNw9R2PPluSSUatDhTMNRAqASSlaSS7ZluiLz3X5M7ZLZLlILoj2YJ7c3MKQd3RrbdSSlaSSSSePPzeH8pnYfjq1oinf3cx24LStOhjgamOehTyglZgI1NNo%3D	Férfi	Gál Ferenc Főiskola		Alapképzési (Bsc)	Ápoló (Bsc)		Levelezős	Első	Igen	Nem	Igen	Igen	Soha	Igen	Igen	Igen		Google		Wikipedia				Egészségügyi szakemberek véleményének megismerése	Nem		Igen	az 1.-2. évfolyamon	Igen, csak magyarul szeretek olvasni	Valamennyire értek hozzá (2)	Átlagos (3)	Gyenge (1)	Gyenge (1)	Gyenge (1)	Valamennyire értek hozzá (2)	Többé-kevésbé értem a jelentését	Nem ismerem a jelentését, de szeretném megismerni	Értem a jelentését, és másoknak is el tudnám magyarázni	Értem a jelentését, és másoknak is el tudnám magyarázni	Nem ismerem a jelentését, de szeretném megismerni	Nem ismerem a jelentését, de szeretném megismerni	Többé-kevésbé értem a jelentését	Többé-kevésbé értem a jelentését	Nem ismerem a jelentését, de szeretném megismerni	Nem ismerem a jelentését, de szeretném megismerni	Többé-kevésbé értem a jelentését	Értem a jelentését, és másoknak is el tudnám magyarázni	Értem a jelentését, és másoknak is el tudnám magyarázni
201	https://online-kerdoiv.com/index/view/hash/f505d52a49dd686dada6511e6d93f5bb/r/HjGVKk41ApNbh1fhqVJnCZSSlaSSgJFQKJxiPPluSSvQBROb4SSlaSSobAvRZ85Ds4qql7RyccapkSSlaSSIKPPluSSEnCSNCHdCx1MojYbZ6YOKI6kJ9hplCdhlV1ioYILDNtIugpOcI0TsefHMY0R6jSSePPAUCMY1MB7IrGn2dLega4zVTKMHIT99Ox2Qgo8ccZFyA%3D	Nő	Semmelweis Egyetem		Alapképzési (Bsc)	Dietetikus (Bsc)		Nappali	Második	Nem	Igen	Nem		Havonta vagy ritkábban	Igen	Igen	Igen		Google						Nyomtatott folyóiratok	Igen	Igen	Igen	a 3.-4. évfolyamon	Igen, csak magyarul szeretek olvasni	Átlagos (3)	Átlagos (3)	Valamennyire értek hozzá (2)	Valamennyire értek hozzá (2)	Átlagosnál jobb (4)	Átlagosnál jobb (4)	Értem a jelentését, és másoknak is el tudnám magyarázni	Értem a jelentését, és másoknak is el tudnám magyarázni	Értem a jelentését, és másoknak is el tudnám magyarázni	Értem a jelentését, és másoknak is el tudnám magyarázni	Többé-kevésbé értem a jelentését	Többé-kevésbé értem a jelentését	Többé-kevésbé értem a jelentését	Többé-kevésbé értem a jelentését	Értem a jelentését, és másoknak is el tudnám magyarázni	Többé-kevésbé értem a jelentését	Értem a jelentését, és másoknak is el tudnám magyarázni	Értem a jelentését, és másoknak is el tudnám magyarázni	Többé-kevésbé értem a jelentését
202	https://online-kerdoiv.com/index/view/hash/f505d52a49dd686dada6511e6d93f5bb/r/AnsMJEpvM1lvFY1bBPnGA3nkQobE3YFi4lXI1lilgjW3wvmjf7PPluSSlJPN5g0X2PPFZFyIjSyKXJZoyfKeb4OdariIT51uOcIi1wWsgFN6QciDl1dkIZq80qEmoR1do1EwASSePP3UPQlNKqYSSlaSSHX6e7E0AOIaDYRgmjdnnFykwLhByY2e8k%3D	Nő	Semmelweis Egyetem		Alapképzési (Bsc)	Ápoló (Bsc)		Nappali	Harmadik	Nem	Nem	Nem		Naponta	Igen	Igen	Igen		Google		Wikipedia	Pubmed/Medline			Elektronikus folyóiratok	Igen	Igen	Igen	a 3.-4. évfolyamon	Nem, sőt, olvastam már olyan forrást is, ami egyéb (nem angol vagy magyar) nyelven íródott	Átlagos (3)	Átlagosnál jobb (4)	Átlagosnál jobb (4)	Átlagos (3)	Átlagosnál jobb (4)	Átlagosnál jobb (4)	Értem a jelentését, és másoknak is el tudnám magyarázni	Többé-kevésbé értem a jelentését	Értem a jelentését, és másoknak is el tudnám magyarázni	Értem a jelentését, és másoknak is el tudnám magyarázni	Többé-kevésbé értem a jelentését	Többé-kevésbé értem a jelentését	Értem a jelentését, és másoknak is el tudnám magyarázni	Többé-kevésbé értem a jelentését	Nem ismerem a jelentését, de szeretném megismerni	Többé-kevésbé értem a jelentését	Értem a jelentését, és másoknak is el tudnám magyarázni	Értem a jelentését, és másoknak is el tudnám magyarázni	Értem a jelentését, és másoknak is el tudnám magyarázni
203	https://online-kerdoiv.com/index/view/hash/f505d52a49dd686dada6511e6d93f5bb/r/GQBPcXByk7ervMqP6joVcwqbSqYgyyDBepjthgCOHAbhEarDwcxBx7zN1RsEX7Q32hMZ5lFnpoubQYMLxHDFthb9reVOJxi3djFaqfSSlaSSNuzZtttiNUk0u4Q68G5ZZBhgESSePPLK8DbVer8NY6kPAwEMujjWQnYiXvSKsoiuOVh3TIjTU%3D	Nő	Semmelweis Egyetem		Alapképzési (Bsc)	Gyógytornász (Bsc)		Nappali	Második	Igen	Nem	Nem		Havonta vagy ritkábban	Igen	Igen	Nem		Google			Pubmed/Medline			Nyomtatott szakkönyvek	Nem		Igen	az 1.-2. évfolyamon	Nem, az angol és magyar nyelvű forrásokat egyaránt elolvasom	Valamennyire értek hozzá (2)	Valamennyire értek hozzá (2)	Gyenge (1)	Gyenge (1)	Gyenge (1)	Valamennyire értek hozzá (2)	Többé-kevésbé értem a jelentését	Nem ismerem a jelentését, de szeretném megismerni	Nem ismerem a jelentését, de szeretném megismerni	Értem a jelentését, és másoknak is el tudnám magyarázni	Nem ismerem a jelentését, de szeretném megismerni	Nem ismerem a jelentését, de szeretném megismerni	Nem ismerem a jelentését, de szeretném megismerni	Többé-kevésbé értem a jelentését	Nem ismerem a jelentését, de szeretném megismerni	Nem ismerem a jelentését, de szeretném megismerni	Nem ismerem a jelentését, de szeretném megismerni	Nem ismerem a jelentését, de szeretném megismerni	Nem ismerem a jelentését, de szeretném megismerni
204	https://online-kerdoiv.com/index/view/hash/f505d52a49dd686dada6511e6d93f5bb/r/SSlaSSyg49pO6HESSlaSSSSlaSS1lPCbVSZp9TvPO2kkfCuKFoSIAikn0PpIc5ZxOFYQGH0A70Pysi2UPPluSSGrUnePrE3Byt793A7PPluSSkmxP0EUXXPQvuUET4SSlaSS6xMI2zh7ESSlaSSM2BuhSaIA3w3nfWFSSePP5gPeKf0PPluSSayvTdiR752fSSlaSSfw3o63DDZ7bHTaIVo0Mll2c%3D	Nő	Semmelweis Egyetem		Alapképzési (Bsc)	Dietetikus (Bsc)		Nappali	Első	Nem	Nem	Igen	Igen	Havonta vagy ritkábban	Igen	Igen	Igen		Google		Wikipedia	Pubmed/Medline			Oktatási jegyzetek	Nem		Igen	a 3.-4. évfolyamon	Nem, az angol és magyar nyelvű forrásokat egyaránt elolvasom	Átlagos (3)	Átlagosnál jobb (4)	Átlagos (3)	Átlagosnál jobb (4)	Átlagosnál jobb (4)	Haladó szintű (5)	Többé-kevésbé értem a jelentését	Többé-kevésbé értem a jelentését	Nem ismerem a jelentését, de szeretném megismerni	Többé-kevésbé értem a jelentését	Nem ismerem a jelentését, de szeretném megismerni	Nem ismerem a jelentését, de szeretném megismerni	Nem ismerem a jelentését, de szeretném megismerni	Nem ismerem a jelentését, de szeretném megismerni	Nem ismerem a jelentését, de szeretném megismerni	Nem ismerem a jelentését, de szeretném megismerni	Nem ismerem a jelentését, de szeretném megismerni	Nem ismerem a jelentését, de szeretném megismerni	Nem ismerem a jelentését, de szeretném megismerni
205	https://online-kerdoiv.com/index/view/hash/f505d52a49dd686dada6511e6d93f5bb/r/ESSlaSSzyt5X6ZzVU9lSSlaSSCfFcJgHKROydc3grBWoVDfIrn5Qmjaa9MclrYXh3l64E8KaMFPPluSSMtrNBrdMDelLhmLIifZRuDJhjDhmBMlqS73AzxbLoaXZfGJFJ7tB4LdsKmQj0FRSSePPUyGUgSSlaSScn0cAjlsWCzn81ThVeEebSSlaSSSiVf6timWmYJwzs%3D	Nő	Semmelweis Egyetem		Alapképzési (Bsc)	Népegészségügyi ellenőr (Bsc)		Levelezős	Negyedik	Igen	Nem	Igen	Nem	Havonta vagy ritkábban	Igen	Igen	Nem					Pubmed/Medline			Nyomtatott szakkönyvek	Nem		Igen	az 1.-2. évfolyamon	Igen, csak magyarul szeretek olvasni	Átlagos (3)	Átlagos (3)	Átlagos (3)	Valamennyire értek hozzá (2)	Átlagos (3)	Átlagos (3)	Többé-kevésbé értem a jelentését	Nem ismerem a jelentését, de szeretném megismerni	Értem a jelentését, és másoknak is el tudnám magyarázni	Értem a jelentését, és másoknak is el tudnám magyarázni	Értem a jelentését, és másoknak is el tudnám magyarázni	Többé-kevésbé értem a jelentését	Értem a jelentését, és másoknak is el tudnám magyarázni	Értem a jelentését, és másoknak is el tudnám magyarázni	Nem ismerem a jelentését, de szeretném megismerni	Nem ismerem a jelentését, de szeretném megismerni	Értem a jelentését, és másoknak is el tudnám magyarázni	Értem a jelentését, és másoknak is el tudnám magyarázni	Többé-kevésbé értem a jelentését
206	https://online-kerdoiv.com/index/view/hash/f505d52a49dd686dada6511e6d93f5bb/r/YYuOd9Sg4NLRd8GeELKz0HZHUsl4k4WZc3jYwPPluSSaOALrqCWPPluSSzactNu45Iq2WAR04IziVmWTyD2uB2rn7kjVyh5G3P4aV38iuxG8Xh9BPPluSStE2T7woxchDG3R1ipTxIPPluSSjzeESSePPspYOddXPrJxtHoc6SSlaSSZAzWK8dsSSlaSSbwF5vLq4trP8ALDwI%3D	Nő	Semmelweis Egyetem		Alapképzési (Bsc)	Dietetikus (Bsc)		Levelezős	Harmadik	Nem	Nem	Nem		Hetente	Igen	Igen	Nem		Google		Wikipedia	Pubmed/Medline			Oktatási jegyzetek	Nem		Igen	a 3.-4. évfolyamon	Nem, az angol és magyar nyelvű forrásokat egyaránt elolvasom	Átlagosnál jobb (4)	Átlagos (3)	Gyenge (1)	Gyenge (1)	Gyenge (1)	Valamennyire értek hozzá (2)	Értem a jelentését, és másoknak is el tudnám magyarázni	Nem ismerem a jelentését, de szeretném megismerni	Többé-kevésbé értem a jelentését	Többé-kevésbé értem a jelentését	Többé-kevésbé értem a jelentését	Nem ismerem a jelentését, de szeretném megismerni	Nem ismerem a jelentését, de szeretném megismerni	Nem ismerem a jelentését, de szeretném megismerni	Nem ismerem a jelentését, de szeretném megismerni	Nem ismerem a jelentését, de szeretném megismerni	Többé-kevésbé értem a jelentését	Többé-kevésbé értem a jelentését	Nem ismerem a jelentését, de szeretném megismerni
207	https://online-kerdoiv.com/index/view/hash/f505d52a49dd686dada6511e6d93f5bb/r/fg6vG2F5LqpkwwwxdefsZz4C7csmzHPPluSSB0PPluSSvVb9RTmHg6bRpZHkpNEsfhG2xkrRXgAQFPPluSSz4PPluSShXovvi6wbCmHPAoYlInNhyhHG5eglGNQDVNzBmLI8QkkTTlk9sQ11RpVPSSePPZn1VPPluSSfSSlaSSWvYPPluSSxePMmns64qVadm4GluRH8iJq1yeYK4Yc%3D	Nő	Semmelweis Egyetem		Alapképzési (Bsc)	Szülésznő (Bsc)		Nappali	Első	Nem	Nem	Igen	Nem	Soha	Igen	Igen	Nem		Google						Elektonikus média	Nem		Igen	a 3.-4. évfolyamon	Igen, csak magyarul szeretek olvasni	Átlagos (3)	Valamennyire értek hozzá (2)	Valamennyire értek hozzá (2)	Haladó (5)	Valamennyire értek hozzá (2)	Átlagos (3)	Értem a jelentését, és másoknak is el tudnám magyarázni	Nem ismerem a jelentését, de szerintem nem is hasznos számomra	Értem a jelentését, és másoknak is el tudnám magyarázni	Többé-kevésbé értem a jelentését	Nincs véleményem ezzel kapcsolatos	Nem ismerem a jelentését, de szeretném megismerni	Nem ismerem a jelentését, de szeretném megismerni	Értem a jelentését, és másoknak is el tudnám magyarázni	Nem ismerem a jelentését, de szeretném megismerni	Nem ismerem a jelentését, de szeretném megismerni	Nem ismerem a jelentését, de szeretném megismerni	Értem a jelentését, és másoknak is el tudnám magyarázni	Többé-kevésbé értem a jelentését
208	https://online-kerdoiv.com/index/view/hash/f505d52a49dd686dada6511e6d93f5bb/r/uFfFp26hIDqg44QOp2kiePJSSlaSSRaDgezuAkJR77SSlaSSgOJ1S8lmKP3w3GwR2rGcQhBfKfVMcbL33JfsxCw7hqSSlaSSSSlaSSpCYGSSlaSS2lnj3ZoFYYJdBpTe5YQRSSlaSSIMBVxyWxSSlaSSPPluSSoSa2xl47u5SSePPWRR05b8HFBdlWkJEUhqxnfz8Cp6BQLiBigkK1VSSSlaSSrZA%3D	Nő	Semmelweis Egyetem		Alapképzési (Bsc)	Dietetikus (Bsc)		Nappali	Első	Nem	Nem	Nem		Soha	Igen	Igen	Igen		Google		Wikipedia				Nyomtatott szakkönyvek	Nem		Igen	a 3.-4. évfolyamon	Nem, az angol és magyar nyelvű forrásokat egyaránt elolvasom	Valamennyire értek hozzá (2)	Átlagosnál jobb (4)	Gyenge (1)	Gyenge (1)	Átlagos (3)	Átlagosnál jobb (4)	Többé-kevésbé értem a jelentését	Nem ismerem a jelentését, de szeretném megismerni	Többé-kevésbé értem a jelentését	Többé-kevésbé értem a jelentését	Nem ismerem a jelentését, de szerintem nem is hasznos számomra	Nem ismerem a jelentését, de szerintem nem is hasznos számomra	Többé-kevésbé értem a jelentését	Többé-kevésbé értem a jelentését	Nem ismerem a jelentését, de szeretném megismerni	Többé-kevésbé értem a jelentését	Nem ismerem a jelentését, de szeretném megismerni	Többé-kevésbé értem a jelentését	Többé-kevésbé értem a jelentését
209	https://online-kerdoiv.com/index/view/hash/f505d52a49dd686dada6511e6d93f5bb/r/wQhSSlaSSgRdnyZYd6usabhRyuKBRfBGWnSSlaSSV5Hwxt2CGyzFm4QHSSlaSSAV1l4R29w57sCXiUO2ZX5i8PPluSSkcshSSlaSSPPluSSKwSd1pqrclhQz6cCAR1BoKW85omXIpFvs5sfRaz2BHKw0AmB8qZSSePPWOkNPPluSSJRrDSSlaSSp8PPluSS6VcQpyT5aF4PPluSSdx67l0OZJQco5PPluSSgPPluSSIA%3D	Nő	Semmelweis Egyetem		Alapképzési (Bsc)	Szülésznő (Bsc)		Nappali	Első	Nem	Nem	Nem		Havonta vagy ritkábban	Igen	Igen	Nem		Google		Wikipedia	Pubmed/Medline			Nyomtatott szakkönyvek	Nem		Igen	a 3.-4. évfolyamon	Nem, az angol és magyar nyelvű forrásokat egyaránt elolvasom	Átlagos (3)	Átlagos (3)	Gyenge (1)	Gyenge (1)	Gyenge (1)	Gyenge (1)	Többé-kevésbé értem a jelentését	Nem ismerem a jelentését, de szeretném megismerni	Értem a jelentését, és másoknak is el tudnám magyarázni	Értem a jelentését, és másoknak is el tudnám magyarázni	Nem ismerem a jelentését, de szeretném megismerni	Nem ismerem a jelentését, de szeretném megismerni	Többé-kevésbé értem a jelentését	Nem ismerem a jelentését, de szeretném megismerni	Nem ismerem a jelentését, de szeretném megismerni	Nem ismerem a jelentését, de szeretném megismerni	Értem a jelentését, és másoknak is el tudnám magyarázni	Értem a jelentését, és másoknak is el tudnám magyarázni	Többé-kevésbé értem a jelentését
210	https://online-kerdoiv.com/index/view/hash/f505d52a49dd686dada6511e6d93f5bb/r/PPluSSZwkWGiA2wj89lUDuVXqhoqTuIFH2uFG7Jekv9m8qd2Hnrmfl5HJO9M2PAf2uS4OsVep0Mtx3hstU3U5sB7JBYyktjP0kekXNx05jxDMuiRs5zH8SSlaSSXPjCzsSSlaSS1FuXfgPCSSePP8hmYkYt66ajf0sPo0k17LimEPPluSSCL8cg7C055hJrNRDug%3D	Nő	Semmelweis Egyetem		Alapképzési (Bsc)	Védőnő (Bsc)		Nappali	Negyedik	Nem	Nem	Nem		Havonta vagy ritkábban	Igen	Igen	Nem		Google		Wikipedia	Pubmed/Medline			Nyomtatott szakkönyvek	Nem		Igen	a 3.-4. évfolyamon	Igen, csak magyarul szeretek olvasni	Átlagosnál jobb (4)	Haladó szintű (5)	Valamennyire értek hozzá (2)	Valamennyire értek hozzá (2)	Átlagos (3)	Átlagos (3)	Értem a jelentését, és másoknak is el tudnám magyarázni	Többé-kevésbé értem a jelentését	Értem a jelentését, és másoknak is el tudnám magyarázni	Többé-kevésbé értem a jelentését	Nem ismerem a jelentését, de szeretném megismerni	Nem ismerem a jelentését, de szeretném megismerni	Többé-kevésbé értem a jelentését	Nem ismerem a jelentését, de szeretném megismerni	Nem ismerem a jelentését, de szeretném megismerni	Nem ismerem a jelentését, de szeretném megismerni	Többé-kevésbé értem a jelentését	Értem a jelentését, és másoknak is el tudnám magyarázni	Értem a jelentését, és másoknak is el tudnám magyarázni
211	https://online-kerdoiv.com/index/view/hash/f505d52a49dd686dada6511e6d93f5bb/r/0ZBrmEcNfnh4wPK71oPGuTUquCqesLCcD7YAH0Z6W0UH3R4QFcul8sMgJA7P4ilNv2JAaips0M3jqRJUpwyKiINkSSlaSSvUCgHLRhGySSlaSS3t62ue8Q0c8Hebfiy4oSivyl2CQySSePPtJtxI1ooxqS7PQwYIlSr4CGWjtSx4JFWq8VbPPluSSXRtDS0%3D	Nő	Semmelweis Egyetem		Alapképzési (Bsc)	Mentőtiszt (Bsc)		Nappali	Első	Nem	Nem	Nem		Havonta vagy ritkábban	Igen	Igen	Igen		Google		Wikipedia	Pubmed/Medline	Medscape		Nyomtatott szakkönyvek	Igen	Igen	Igen	az 1.-2. évfolyamon	Nem, sőt, olvastam már olyan forrást is, ami egyéb (nem angol vagy magyar) nyelven íródott	Átlagos (3)	Átlagos (3)	Valamennyire értek hozzá (2)	Valamennyire értek hozzá (2)	Átlagos (3)	Átlagosnál jobb (4)	Értem a jelentését, és másoknak is el tudnám magyarázni	Többé-kevésbé értem a jelentését	Értem a jelentését, és másoknak is el tudnám magyarázni	Értem a jelentését, és másoknak is el tudnám magyarázni	Nem ismerem a jelentését, de szeretném megismerni	Értem a jelentését, és másoknak is el tudnám magyarázni	Értem a jelentését, és másoknak is el tudnám magyarázni	Értem a jelentését, és másoknak is el tudnám magyarázni	Többé-kevésbé értem a jelentését	Többé-kevésbé értem a jelentését	Értem a jelentését, és másoknak is el tudnám magyarázni	Értem a jelentését, és másoknak is el tudnám magyarázni	Értem a jelentését, és másoknak is el tudnám magyarázni
212	https://online-kerdoiv.com/index/view/hash/f505d52a49dd686dada6511e6d93f5bb/r/sZzSSlaSSqSSlaSSYGwpdfsjtjPcaWf0QrTm6bhCiWPLeIjzQJl7547Sdy0koEtfzylQK4SSlaSSPXMukTfIpZzEnlvKPPluSSmHCYZvFj0xrEa0vnmhHISSlaSSvEUDBSSlaSS8nMWfusZXcRWY8VIK66cPPluSSdOSSePPSF0C1nSHdZ2zrwceCSbjzq1FmIdXWY3ridJtqcMSSlaSSPto%3D	Nő	Semmelweis Egyetem		Alapképzési (Bsc)	Ápoló (Bsc)		Levelezős	Első	Igen	Igen	Igen	Igen	Hetente	Igen	Igen	Igen		Google		Wikipedia	Pubmed/Medline	Medscape		Egészségügyi szakemberek véleményének megismerése	Igen	Igen	Igen	az 1.-2. évfolyamon	Igen, csak magyarul szeretek olvasni	Átlagosnál jobb (4)	Átlagos (3)	Átlagos (3)	Átlagos (3)	Átlagosnál jobb (4)	Haladó szintű (5)	Értem a jelentését, és másoknak is el tudnám magyarázni	Többé-kevésbé értem a jelentését	Értem a jelentését, és másoknak is el tudnám magyarázni	Értem a jelentését, és másoknak is el tudnám magyarázni	Többé-kevésbé értem a jelentését	Nem ismerem a jelentését, de szeretném megismerni	Értem a jelentését, és másoknak is el tudnám magyarázni	Értem a jelentését, és másoknak is el tudnám magyarázni	Többé-kevésbé értem a jelentését	Nem ismerem a jelentését, de szeretném megismerni	Értem a jelentését, és másoknak is el tudnám magyarázni	Értem a jelentését, és másoknak is el tudnám magyarázni	Értem a jelentését, és másoknak is el tudnám magyarázni
213	https://online-kerdoiv.com/index/view/hash/f505d52a49dd686dada6511e6d93f5bb/r/zQx3L9C6fy10NYqzfOt356SIF4jpU7f7bQKefCJ8ukO4QnMtXflwWvcMsAX9ntEh7XjYMbWH342qxzEUzoarHpKXpb3o6V4gkXXY5baXZnATSZJLVwQPPPluSSi7IoQUdnFPPluSSPSSePP5KtHytgxhljTWK3ZVuu1hOKRwZS0bI7xxk32MjFKKaw%3D	Nő	Semmelweis Egyetem		Alapképzési (Bsc)	Egészségturizmus szervező (Bsc)		Levelezős	Második	Igen	Nem	Nem		Havonta vagy ritkábban	Igen	Igen	Igen		Google			Pubmed/Medline			Egészségügyi szakemberek véleményének megismerése	Nem		Igen	a 3.-4. évfolyamon	Nem, az angol és magyar nyelvű forrásokat egyaránt elolvasom	Átlagos (3)	Átlagos (3)	Átlagos (3)	Valamennyire értek hozzá (2)	Átlagosnál jobb (4)	Haladó szintű (5)	Értem a jelentését, és másoknak is el tudnám magyarázni	Nem ismerem a jelentését, de szeretném megismerni	Nem ismerem a jelentését, de szeretném megismerni	Nem ismerem a jelentését, de szeretném megismerni	Nem ismerem a jelentését, de szeretném megismerni	Nem ismerem a jelentését, de szeretném megismerni	Nem ismerem a jelentését, de szeretném megismerni	Nem ismerem a jelentését, de szeretném megismerni	Nem ismerem a jelentését, de szeretném megismerni	Nem ismerem a jelentését, de szeretném megismerni	Többé-kevésbé értem a jelentését	Többé-kevésbé értem a jelentését	Nem ismerem a jelentését, de szeretném megismerni
214	https://online-kerdoiv.com/index/view/hash/f505d52a49dd686dada6511e6d93f5bb/r/oCBgX3qowD2DNmwGjTPftNID6SSlaSSFNe5pF0M0JaSSlaSSyZa1SSlaSSMSSlaSSzrsW9lBCiSSlaSSGPBqzpPfOXBYRmKPPluSSVoB6aCS4CPPluSSxrEprqXdw3tXswRRuTOOWjKEwCfNDcx60IWb4QjJINVNZP3SSePPYqwYpzghgY29PPluSSNpCEIkPBvPPluSSiaRuDGzQKD9DlOb9IafE%3D	Nő	Semmelweis Egyetem		Alapképzési (Bsc)	Dietetikus (Bsc)		Nappali	Második	Nem	Nem	Nem		Havonta vagy ritkábban	Igen	Igen	Igen		Google	Google Scholar	Wikipedia	Pubmed/Medline			Szakmai irányelvek	Nem		Igen	a 3.-4. évfolyamon	Nem, az angol és magyar nyelvű forrásokat egyaránt elolvasom	Gyenge (1)	Valamennyire értek hozzá (2)	Gyenge (1)	Gyenge (1)	Valamennyire értek hozzá (2)	Átlagos (3)	Többé-kevésbé értem a jelentését	Nem ismerem a jelentését, de szeretném megismerni	Értem a jelentését, és másoknak is el tudnám magyarázni	Többé-kevésbé értem a jelentését	Nem ismerem a jelentését, de szeretném megismerni	Nem ismerem a jelentését, de szeretném megismerni	Nem ismerem a jelentését, de szeretném megismerni	Nem ismerem a jelentését, de szeretném megismerni	Nem ismerem a jelentését, de szeretném megismerni	Nem ismerem a jelentését, de szeretném megismerni	Nem ismerem a jelentését, de szeretném megismerni	Értem a jelentését, és másoknak is el tudnám magyarázni	Nem ismerem a jelentését, de szeretném megismerni
215	https://online-kerdoiv.com/index/view/hash/f505d52a49dd686dada6511e6d93f5bb/r/QHX99SWL1VpPOms3mDB6LDhncoDvl4kt5YFlcK2HkAuBituuhXCf0N8lOUZ1ntCxVA4OdKvYSCxjdga943z5us6uFiFx5PPluSSylyPPluSSZuT3qYIuGHKoKfBCG2gPPluSSCI0iWNypY5SSePPiOH5t443SkxopWL1qasypEew6B2LcEhtlsb7JolSSlaSSXGs%3D	Nő	Semmelweis Egyetem		Alapképzési (Bsc)	Mentőtiszt (Bsc)		Nappali	Második	Nem	Igen	Igen	Igen	Hetente	Igen	Igen	Igen		Google		Wikipedia	Pubmed/Medline	Medscape		Nyomtatott szakkönyvek	Igen	Igen	Igen	a 3.-4. évfolyamon	Igen, csak magyarul szeretek olvasni	Átlagosnál jobb (4)	Valamennyire értek hozzá (2)	Gyenge (1)	Valamennyire értek hozzá (2)	Átlagos (3)	Átlagosnál jobb (4)	Értem a jelentését, és másoknak is el tudnám magyarázni	Nem ismerem a jelentését, de szeretném megismerni	Értem a jelentését, és másoknak is el tudnám magyarázni	Értem a jelentését, és másoknak is el tudnám magyarázni	Nem ismerem a jelentését, de szeretném megismerni	Többé-kevésbé értem a jelentését	Értem a jelentését, és másoknak is el tudnám magyarázni	Többé-kevésbé értem a jelentését	Nem ismerem a jelentését, de szeretném megismerni	Többé-kevésbé értem a jelentését	Többé-kevésbé értem a jelentését	Értem a jelentését, és másoknak is el tudnám magyarázni	Értem a jelentését, és másoknak is el tudnám magyarázni
216	https://online-kerdoiv.com/index/view/hash/f505d52a49dd686dada6511e6d93f5bb/r/VjMrnqoQqH4H591hm0jQIXFUfRBIEwIbbLR4koIC3mdIYfhTN7zTXVQsCj4IDJ0AhE1ksebT5CHLE3TP9Ckjfqpdzu2GI5Gvd8uQx12Wzir2lqe7iCtthXJpQQWSM3EGSSePPv9lzIVOps60T3Bs4jgAHC8UaLsXruWGr5w5yZn19ENc%3D	Nő	Semmelweis Egyetem		Alapképzési (Bsc)	Dietetikus (Bsc)		Nappali	Második	Nem	Nem	Igen	Nem	Havonta vagy ritkábban	Igen	Igen	Igen		Google	Google Scholar					Nyomtatott szakkönyvek	Nem		Igen	az 1.-2. évfolyamon	Igen, csak magyarul szeretek olvasni	Átlagos (3)	Átlagosnál jobb (4)	Valamennyire értek hozzá (2)	Gyenge (1)	Gyenge (1)	Átlagos (3)	Többé-kevésbé értem a jelentését	Többé-kevésbé értem a jelentését	Értem a jelentését, és másoknak is el tudnám magyarázni	Többé-kevésbé értem a jelentését	Nem ismerem a jelentését, de szeretném megismerni	Nem ismerem a jelentését, de szeretném megismerni	Többé-kevésbé értem a jelentését	Többé-kevésbé értem a jelentését	Nem ismerem a jelentését, de szeretném megismerni	Nem ismerem a jelentését, de szeretném megismerni	Többé-kevésbé értem a jelentését	Többé-kevésbé értem a jelentését	Többé-kevésbé értem a jelentését
217	https://online-kerdoiv.com/index/view/hash/f505d52a49dd686dada6511e6d93f5bb/r/YuyKE18tmSSlaSSsBYDwwy8o7iBcSSlaSSouirSSlaSSdB2BsrMDoSSlaSSsXCTmUpV46QehPPluSSzqPXc7hVXqgOYj10PPluSSkvTSlj4ajnzaXwyeIMoDAysdlxq6SXaSSlaSScpxzIUSSlaSS6iV7cHrwuR9HqMmrvVBSSePPlNvhJGPPluSS4DpJCSxQPPluSSd6LXuuBFwFISXGYYjy8YZDlklQ0%3D	Nő	Semmelweis Egyetem		Alapképzési (Bsc)	Mentőtiszt (Bsc)		Nappali	Második	Igen	Nem	Nem		Havonta vagy ritkábban	Igen	Igen	Nem		Google			Pubmed/Medline			Nyomtatott szakkönyvek	Nem		Igen	az 1.-2. évfolyamon	Igen, csak magyarul szeretek olvasni	Valamennyire értek hozzá (2)	Valamennyire értek hozzá (2)	Átlagos (3)	Valamennyire értek hozzá (2)	Átlagosnál jobb (4)	Átlagosnál jobb (4)	Értem a jelentését, és másoknak is el tudnám magyarázni	Nem ismerem a jelentését, de szeretném megismerni	Többé-kevésbé értem a jelentését	Többé-kevésbé értem a jelentését	Többé-kevésbé értem a jelentését	Nem ismerem a jelentését, de szeretném megismerni	Többé-kevésbé értem a jelentését	Nem ismerem a jelentését, de szeretném megismerni	Nem ismerem a jelentését, de szeretném megismerni	Nem ismerem a jelentését, de szeretném megismerni	Értem a jelentését, és másoknak is el tudnám magyarázni	Értem a jelentését, és másoknak is el tudnám magyarázni	Nem ismerem a jelentését, de szeretném megismerni
218	https://online-kerdoiv.com/index/view/hash/f505d52a49dd686dada6511e6d93f5bb/r/E2Lh0slDwm3wO0A5NbrhcM3OJTZv2lCeMLXlxkKBnTkndnbap5p1Ik9KSPWmAaoR4ChFhK6rLcTpPoMyNpytgIjdtg7OQxamedqknzh9SI7wt8b6WTWPQrRNPPluSSj3VB1TkSSePPlSJFx1PPluSSfv7vG5gBPpHreZ1bpawqnR3bZmxn4v6SSlaSShSSlaSSc0%3D	Nő	Semmelweis Egyetem		Mesterképzési (Msc)	Ápolás (Msc)		Nappali	Második	Igen	Nem	Igen	Nem	Hetente	Igen	Igen	Nem		Google		Wikipedia	Pubmed/Medline			Elektronikus folyóiratok	Nem		Igen	a 3.-4. évfolyamon	Nem, az angol és magyar nyelvű forrásokat egyaránt elolvasom	Átlagos (3)	Átlagos (3)	Átlagos (3)	Átlagos (3)	Átlagosnál jobb (4)	Átlagosnál jobb (4)	Értem a jelentését, és másoknak is el tudnám magyarázni	Többé-kevésbé értem a jelentését	Értem a jelentését, és másoknak is el tudnám magyarázni	Értem a jelentését, és másoknak is el tudnám magyarázni	Többé-kevésbé értem a jelentését	Többé-kevésbé értem a jelentését	Értem a jelentését, és másoknak is el tudnám magyarázni	Többé-kevésbé értem a jelentését	Többé-kevésbé értem a jelentését	Többé-kevésbé értem a jelentését	Többé-kevésbé értem a jelentését	Értem a jelentését, és másoknak is el tudnám magyarázni	Értem a jelentését, és másoknak is el tudnám magyarázni
219	https://online-kerdoiv.com/index/view/hash/f505d52a49dd686dada6511e6d93f5bb/r/9EiESaKcC48PPluSS0s5mgCVSSlaSSxUsxgj10WBzqXHoIJVaUB4aoPQ87MMunfZmocmgspZq2wInYSSlaSSrcH5J6roBLQaGOApqKRswdTEnumxPXGQZyTRaUlXMpEMSSlaSS7SuLcalsUySv0VSSePPsTojKPu4xW1htmP9E41LzoqKnzMTjXOqMyk5R0Ekyfg%3D	Nő	Semmelweis Egyetem		Alapképzési (Bsc)	Orvosi Diagnosztikai Laboratóriumi Analaitika (Bsc)		Levelezős	Első	Nem	Nem	Igen	Igen	Havonta vagy ritkábban	Igen	Igen	Igen		Google		Wikipedia				Nyomtatott szakkönyvek	Igen	Igen	Igen	az 1.-2. évfolyamon	Igen, csak magyarul szeretek olvasni	Átlagos (3)	Átlagos (3)	Valamennyire értek hozzá (2)	Valamennyire értek hozzá (2)	Átlagos (3)	Átlagos (3)	Értem a jelentését, és másoknak is el tudnám magyarázni	Többé-kevésbé értem a jelentését	Többé-kevésbé értem a jelentését	Értem a jelentését, és másoknak is el tudnám magyarázni	Nem ismerem a jelentését, de szeretném megismerni	Nem ismerem a jelentését, de szeretném megismerni	Nem ismerem a jelentését, de szeretném megismerni	Értem a jelentését, és másoknak is el tudnám magyarázni	Nem ismerem a jelentését, de szeretném megismerni	Nem ismerem a jelentését, de szeretném megismerni	Értem a jelentését, és másoknak is el tudnám magyarázni	Értem a jelentését, és másoknak is el tudnám magyarázni	Értem a jelentését, és másoknak is el tudnám magyarázni
220	https://online-kerdoiv.com/index/view/hash/f505d52a49dd686dada6511e6d93f5bb/r/qOAVGWEclNE1vhJGnl4feGdzClMIgGxunTfGNYjdhvcPP5Jw1Pbbhrehj0RH7FjKRw1tjiKCIyLy9wcBRPPluSSBawsjePPluSS0zdzSSSlaSSzIAMubVJEeh2I7u12A9jCL6Vf6nG3jJMgSSePPhXQ3Mmpj4hnDYq2pDoiXfN6EPPluSS5GJxNvo2eiK8Fg9uAg%3D	Nő	Semmelweis Egyetem		Alapképzési (Bsc)	Szülésznő (Bsc)		Nappali	Első	Nem	Nem	Igen	Igen	Havonta vagy ritkábban	Igen	Igen	Igen		Google			Pubmed/Medline			Nyomtatott szakkönyvek	Nem		Igen	a 3.-4. évfolyamon	Nem, sőt, olvastam már olyan forrást is, ami egyéb (nem angol vagy magyar) nyelven íródott	Átlagosnál jobb (4)	Átlagosnál jobb (4)	Átlagos (3)	Átlagos (3)	Átlagosnál jobb (4)	Átlagosnál jobb (4)	Értem a jelentését, és másoknak is el tudnám magyarázni	Többé-kevésbé értem a jelentését	Értem a jelentését, és másoknak is el tudnám magyarázni	Értem a jelentését, és másoknak is el tudnám magyarázni	Nem ismerem a jelentését, de szeretném megismerni	Nem ismerem a jelentését, de szeretném megismerni	Értem a jelentését, és másoknak is el tudnám magyarázni	Értem a jelentését, és másoknak is el tudnám magyarázni	Értem a jelentését, és másoknak is el tudnám magyarázni	Értem a jelentését, és másoknak is el tudnám magyarázni	Értem a jelentését, és másoknak is el tudnám magyarázni	Értem a jelentését, és másoknak is el tudnám magyarázni	Értem a jelentését, és másoknak is el tudnám magyarázni
221	https://online-kerdoiv.com/index/view/hash/f505d52a49dd686dada6511e6d93f5bb/r/PPluSSS0w7rUPPPluSSnSIt3XfSSlaSS69SPPluSSmbTKALGAlUQnYrVflG3SSlaSSpQbTntQcohmyA1APPPluSSLDduRukXNzyfOkPG19UrGKczzHMRupapsQoi215cCwWPPluSS0epvzlgvq5iEodzDz1uzjRRPPluSSWjSSePPFaeNQvMU9ewjXMg1iV9kxUwF3QK5ZL4Ib19oDKFPn3A%3D	Férfi	Semmelweis Egyetem		Alapképzési (Bsc)	Gyógytornász (Bsc)		Nappali	Harmadik	Nem	Nem	Nem		Hetente	Igen	Igen	Igen		Google	Google Scholar		Pubmed/Medline			Elektronikus folyóiratok	Nem		Igen	az 1.-2. évfolyamon	Nem, az angol és magyar nyelvű forrásokat egyaránt elolvasom	Átlagos (3)	Átlagos (3)	Átlagosnál jobb (4)	Valamennyire értek hozzá (2)	Átlagosnál jobb (4)	Átlagos (3)	Értem a jelentését, és másoknak is el tudnám magyarázni	Nem ismerem a jelentését, de szeretném megismerni	Értem a jelentését, és másoknak is el tudnám magyarázni	Többé-kevésbé értem a jelentését	Nem ismerem a jelentését, de szeretném megismerni	Nem ismerem a jelentését, de szeretném megismerni	Többé-kevésbé értem a jelentését	Többé-kevésbé értem a jelentését	Értem a jelentését, és másoknak is el tudnám magyarázni	Nem ismerem a jelentését, de szeretném megismerni	Értem a jelentését, és másoknak is el tudnám magyarázni	Értem a jelentését, és másoknak is el tudnám magyarázni	Többé-kevésbé értem a jelentését
222	https://online-kerdoiv.com/index/view/hash/f505d52a49dd686dada6511e6d93f5bb/r/wzsyPVdM7JmwJ2sYlHGdf2477iMb2yIXvVZwvYbcB1ZjJHJmGiubHrGdcC0QA8ao2WL0dahRkEUa7WAJFacwmaoeukR6Mqwp419muyBro2bciAkehrOPPn8zabWVRFdISSePPkKtuNKq84jLLrp1z3nBWkIshpwVeNUTEYXkAIMHVfno%3D	Nő	Semmelweis Egyetem		Alapképzési (Bsc)	Mentőtiszt (Bsc)		Levelezős	Második	Nem	Nem	Nem		Havonta vagy ritkábban	Igen	Igen	Nem		Google		Wikipedia	Pubmed/Medline	Medscape		Oktatási jegyzetek	Nem		Igen	az 1.-2. évfolyamon	Nem, sőt, olvastam már olyan forrást is, ami egyéb (nem angol vagy magyar) nyelven íródott	Átlagosnál jobb (4)	Átlagosnál jobb (4)	Átlagos (3)	Átlagos (3)	Átlagos (3)	Átlagos (3)	Többé-kevésbé értem a jelentését	Nem ismerem a jelentését, de szeretném megismerni	Nem ismerem a jelentését, de szeretném megismerni	Többé-kevésbé értem a jelentését	Többé-kevésbé értem a jelentését	Többé-kevésbé értem a jelentését	Többé-kevésbé értem a jelentését	Nem ismerem a jelentését, de szeretném megismerni	Nem ismerem a jelentését, de szeretném megismerni	Nem ismerem a jelentését, de szeretném megismerni	Nem ismerem a jelentését, de szeretném megismerni	Többé-kevésbé értem a jelentését	Nem ismerem a jelentését, de szeretném megismerni
223	https://online-kerdoiv.com/index/view/hash/f505d52a49dd686dada6511e6d93f5bb/r/qhUKyJ9qq42xbc9Ma52GyYulFWqHgJVZyw1JrXAje1DPPluSS7e6PPX4eZUdQTXEWE1OybgnkgRY9T1NUnXh0J0JA2FW3PPluSSvLPCeSynM0xdfkbaAXmJJdJr9gRVjSSlaSSZ1OTuzS7WSSePPFEuEohiXWSSlaSSWDqvHS6KfhSSlaSSDMTgFacDASSlaSS522BUoyR0mJY%3D	Nő	Semmelweis Egyetem		Alapképzési (Bsc)	Szülésznő (Bsc)		Nappali	Első	Nem	Nem	Nem		Soha	Igen	Igen	Nem		Google		Wikipedia	Pubmed/Medline			Egészségügyi szakemberek véleményének megismerése	Igen	Igen	Igen	a 3.-4. évfolyamon	Nem, az angol és magyar nyelvű forrásokat egyaránt elolvasom	Átlagosnál jobb (4)	Átlagos (3)	Átlagos (3)	Valamennyire értek hozzá (2)	Átlagosnál jobb (4)	Átlagosnál jobb (4)	Többé-kevésbé értem a jelentését	Nem ismerem a jelentését, de szeretném megismerni	Értem a jelentését, és másoknak is el tudnám magyarázni	Értem a jelentését, és másoknak is el tudnám magyarázni	Nem ismerem a jelentését, de szeretném megismerni	Nem ismerem a jelentését, de szeretném megismerni	Többé-kevésbé értem a jelentését	Értem a jelentését, és másoknak is el tudnám magyarázni	Értem a jelentését, és másoknak is el tudnám magyarázni	Nem ismerem a jelentését, de szeretném megismerni	Értem a jelentését, és másoknak is el tudnám magyarázni	Értem a jelentését, és másoknak is el tudnám magyarázni	Nem ismerem a jelentését, de szerintem nem is hasznos számomra
224	https://online-kerdoiv.com/index/view/hash/f505d52a49dd686dada6511e6d93f5bb/r/zyqPPluSScrVeLa047bdg7pgJMzjfnHJ4jIBuMriUaLA7HdoJH1qv2kc1YFX4wmS32EuhONzODkD6Gy940C81Nbi3yrGPBtlPuwDDzgbFCnYcP3gW2Xvy3tMHZEXrHXPPluSSRxqi5SSePPpk9jXPDucsgAjxSmxfew8B4ZEfoE0S0oADHCv5ObECo%3D	Nő	Semmelweis Egyetem		Alapképzési (Bsc)	Dietetikus (Bsc)		Levelezős	Második	Nem	Nem	Nem		Havonta vagy ritkábban	Igen	Igen	Nem		Google		Wikipedia	Pubmed/Medline			Nyomtatott szakkönyvek	Igen	Igen	Igen	a 3.-4. évfolyamon	Nem, az angol és magyar nyelvű forrásokat egyaránt elolvasom	Átlagos (3)	Átlagos (3)	Valamennyire értek hozzá (2)	Átlagos (3)	Átlagos (3)	Átlagosnál jobb (4)	Többé-kevésbé értem a jelentését	Nem ismerem a jelentését, de szeretném megismerni	Többé-kevésbé értem a jelentését	Többé-kevésbé értem a jelentését	Nem ismerem a jelentését, de szeretném megismerni	Nem ismerem a jelentését, de szeretném megismerni	Nem ismerem a jelentését, de szeretném megismerni	Nem ismerem a jelentését, de szeretném megismerni	Nem ismerem a jelentését, de szeretném megismerni	Nem ismerem a jelentését, de szeretném megismerni	Nem ismerem a jelentését, de szeretném megismerni	Nem ismerem a jelentését, de szeretném megismerni	Nem ismerem a jelentését, de szeretném megismerni
225	https://online-kerdoiv.com/index/view/hash/f505d52a49dd686dada6511e6d93f5bb/r/04nOwnGWMFLZGUDxCOWaq30Z740FDbvF4JgPPluSSVQp7Z6I4dHNSqptkYGrN8kKkCnFjWGxa9UedppgElSPZuSSlaSS8YSSlaSSlT8n86PPluSSwOMWLZmGSUPau5PPluSS718CkPPluSSlnonJRTWadv596XSSePPzwnUHlWS7fdV4FQ0pHASSlaSSgzdxiKaSSlaSSE2cXaVMPlensHyY%3D	Nő	Semmelweis Egyetem		Alapképzési (Bsc)	Mentőtiszt (Bsc)		Nappali	Negyedik	Igen	Nem	Igen	Igen	Hetente	Igen	Igen	Igen		Google	Google Scholar		Pubmed/Medline	Medscape		Szakmai irányelvek	Igen	Igen	Igen	a 3.-4. évfolyamon	Nem, az angol és magyar nyelvű forrásokat egyaránt elolvasom	Átlagos (3)	Átlagosnál jobb (4)	Valamennyire értek hozzá (2)	Átlagos (3)	Valamennyire értek hozzá (2)	Átlagosnál jobb (4)	Értem a jelentését, és másoknak is el tudnám magyarázni	Többé-kevésbé értem a jelentését	Értem a jelentését, és másoknak is el tudnám magyarázni	Értem a jelentését, és másoknak is el tudnám magyarázni	Értem a jelentését, és másoknak is el tudnám magyarázni	Értem a jelentését, és másoknak is el tudnám magyarázni	Értem a jelentését, és másoknak is el tudnám magyarázni	Többé-kevésbé értem a jelentését	Értem a jelentését, és másoknak is el tudnám magyarázni	Többé-kevésbé értem a jelentését	Értem a jelentését, és másoknak is el tudnám magyarázni	Értem a jelentését, és másoknak is el tudnám magyarázni	Értem a jelentését, és másoknak is el tudnám magyarázni
226	https://online-kerdoiv.com/index/view/hash/f505d52a49dd686dada6511e6d93f5bb/r/zFXb9hRgiB3hLAs8UPyeIjP38z566CuZXiPPluSSy20pUzBW7LfJKYPPluSS8jvdVsSSlaSSv4UnAVaUvIKmvB0WlYnnn8ERq4BtNxubFFMXAN2Y2lSSlaSSIY4cxDGDqssKjNou2GcSSlaSSfioXEzBXSSePPTOoyJyQ3wUYAqaCTMvpVdc6sB5sRTE1attCOzd81x6A%3D	Nő	Semmelweis Egyetem		Alapképzési (Bsc)	Dietetikus (Bsc)		Nappali	Negyedik	Nem	Nem	Nem		Hetente	Igen	Igen	Nem		Google	Google Scholar		Pubmed/Medline			Elektronikus folyóiratok	Nem		Igen	a 3.-4. évfolyamon	Nem, az angol és magyar nyelvű forrásokat egyaránt elolvasom	Valamennyire értek hozzá (2)	Valamennyire értek hozzá (2)	Gyenge (1)	Gyenge (1)	Valamennyire értek hozzá (2)	Gyenge (1)	Többé-kevésbé értem a jelentését	Többé-kevésbé értem a jelentését	Értem a jelentését, és másoknak is el tudnám magyarázni	Értem a jelentését, és másoknak is el tudnám magyarázni	Nem ismerem a jelentését, de szeretném megismerni	Nem ismerem a jelentését, de szeretném megismerni	Értem a jelentését, és másoknak is el tudnám magyarázni	Többé-kevésbé értem a jelentését	Nem ismerem a jelentését, de szeretném megismerni	Nem ismerem a jelentését, de szeretném megismerni	Értem a jelentését, és másoknak is el tudnám magyarázni	Értem a jelentését, és másoknak is el tudnám magyarázni	Értem a jelentését, és másoknak is el tudnám magyarázni
227	https://online-kerdoiv.com/index/view/hash/f505d52a49dd686dada6511e6d93f5bb/r/x3hR5iQkgU9ELBXEngSzcYElrE4CqeV2lLXBFR4OcGe7ENSSlaSS0UhWv2dA9ENlIvdw8D0h11ADeaPgYdZC3SUl24urJkJF0DakxaSSlaSS02tu095SSlaSSKTdMPdIU8x99py2VcTTjkiSSePP9ThKuXZJpClXrndSSlaSSYSSlaSSX8wDc4orHNQwYt8NAvJ9PPluSSetSSlaSS4%3D	Nő	Semmelweis Egyetem		Alapképzési (Bsc)	Dietetikus (Bsc)		Nappali	Első	Nem	Nem	Nem		Havonta vagy ritkábban	Igen	Igen	Igen		Google		Wikipedia				Nyomtatott szakkönyvek	Nem		Igen	a 3.-4. évfolyamon	Igen, csak magyarul szeretek olvasni	Átlagosnál jobb (4)	Átlagos (3)	Átlagos (3)	Valamennyire értek hozzá (2)	Átlagosnál jobb (4)	Átlagos (3)	Többé-kevésbé értem a jelentését	Nem ismerem a jelentését, de szeretném megismerni	Többé-kevésbé értem a jelentését	Többé-kevésbé értem a jelentését	Nem ismerem a jelentését, de szeretném megismerni	Nem ismerem a jelentését, de szeretném megismerni	Nem ismerem a jelentését, de szeretném megismerni	Értem a jelentését, és másoknak is el tudnám magyarázni	Nem ismerem a jelentését, de szeretném megismerni	Nem ismerem a jelentését, de szeretném megismerni	Többé-kevésbé értem a jelentését	Értem a jelentését, és másoknak is el tudnám magyarázni	Értem a jelentését, és másoknak is el tudnám magyarázni
228	https://online-kerdoiv.com/index/view/hash/f505d52a49dd686dada6511e6d93f5bb/r/qMAbp9CWlIeRt9JHGDn6K8jxeUKKXK0FPPluSSl3WbScJL95r6E1PPluSSMrpWPKhDHmLJrg0pwjsHyIzGJtxYcE09XOL1dKkwgsew07NSTCeKQytxX6l9UqTEcBJ7aDRPPluSSEjcIxPPluSSyLSSePPPPluSSyuQhkqubf8dAWWk8haQPPluSSkofbaXefxL8uuV5EUwqSSlaSSOs%3D	Nő	Semmelweis Egyetem		Alapképzési (Bsc)	Ápoló (Bsc)		Nappali	Negyedik	Nem	Nem	Igen	Igen	Havonta vagy ritkábban	Igen	Igen	Nem		Google	Google Scholar	Wikipedia	Pubmed/Medline	Medscape		Elektronikus szakkönyvek	Igen	Igen	Igen	az 1.-2. évfolyamon	Nem, sőt, olvastam már olyan forrást is, ami egyéb (nem angol vagy magyar) nyelven íródott	Átlagos (3)	Átlagos (3)	Átlagosnál jobb (4)	Átlagosnál jobb (4)	Átlagosnál jobb (4)	Átlagosnál jobb (4)	Többé-kevésbé értem a jelentését	Nem ismerem a jelentését, de szeretném megismerni	Értem a jelentését, és másoknak is el tudnám magyarázni	Értem a jelentését, és másoknak is el tudnám magyarázni	Értem a jelentését, és másoknak is el tudnám magyarázni	Többé-kevésbé értem a jelentését	Értem a jelentését, és másoknak is el tudnám magyarázni	Értem a jelentését, és másoknak is el tudnám magyarázni	Értem a jelentését, és másoknak is el tudnám magyarázni	Nem ismerem a jelentését, de szeretném megismerni	Értem a jelentését, és másoknak is el tudnám magyarázni	Értem a jelentését, és másoknak is el tudnám magyarázni	Többé-kevésbé értem a jelentését
229	https://online-kerdoiv.com/index/view/hash/f505d52a49dd686dada6511e6d93f5bb/r/3uykoOYJMWOb7Htkysw0xJlTGT8w1SSlaSSSvqUdJLieOyzgvs4dH3lM1tpUKZAyvahTelFmLJ4XdDZDLcym677PhbSEHfObSSlaSSycPv87DAWPPluSSHX8paWKgdQ9h5nQGPoqt6gECWoSSePPGtT7JPPluSSPRjpDfpWytCM87NUJWXtBqRVboyyf3bGe1SSlaSSmQ%3D	Nő	Semmelweis Egyetem		Alapképzési (Bsc)	Dietetikus (Bsc)		Nappali	Első	Nem	Nem	Igen	Igen	Havonta vagy ritkábban	Igen	Igen	Igen		Google	Google Scholar					Egészségügyi szakemberek véleményének megismerése	Nem		Igen	a 3.-4. évfolyamon	Nem, az angol és magyar nyelvű forrásokat egyaránt elolvasom	Átlagos (3)	Átlagosnál jobb (4)	Átlagos (3)	Gyenge (1)	Gyenge (1)	Valamennyire értek hozzá (2)	Nem ismerem a jelentését, de szeretném megismerni	Nem ismerem a jelentését, de szeretném megismerni	Nem ismerem a jelentését, de szeretném megismerni	Többé-kevésbé értem a jelentését	Nem ismerem a jelentését, de szeretném megismerni	Nem ismerem a jelentését, de szeretném megismerni	Nem ismerem a jelentését, de szeretném megismerni	Többé-kevésbé értem a jelentését	Nem ismerem a jelentését, de szeretném megismerni	Nem ismerem a jelentését, de szeretném megismerni	Többé-kevésbé értem a jelentését	Többé-kevésbé értem a jelentését	Többé-kevésbé értem a jelentését
230	https://online-kerdoiv.com/index/view/hash/f505d52a49dd686dada6511e6d93f5bb/r/SSlaSSQF7mh71PPluSSOdy0tReBuabKX47ETJcPPluSS3f8SHrfFyS8mGsystEIPPluSSYdNgutlMSBqQFh1NBwJsNnonM2bfEzWm66Q1y0XxmSSlaSSnh3xGhh6EEVPPluSSlXf21c0bDPPluSSju3ItdN6n3YQgQFSSePP5zhfYH4g1j08QxzKG6gtJYb2vTgweB1UDAPikNmpZSU%3D	Nő	Semmelweis Egyetem		Alapképzési (Bsc)	Népegészségügyi ellenőr (Bsc)		Nappali	Első	Nem	Nem	Igen	Nem	Havonta vagy ritkábban	Igen	Igen	Igen		Google		Wikipedia				Egészségügyi szakemberek véleményének megismerése	Igen	Igen	Igen	az 1.-2. évfolyamon	Nem, az angol és magyar nyelvű forrásokat egyaránt elolvasom	Átlagos (3)	Átlagos (3)	Valamennyire értek hozzá (2)	Gyenge (1)	Átlagos (3)	Átlagosnál jobb (4)	Értem a jelentését, és másoknak is el tudnám magyarázni	Többé-kevésbé értem a jelentését	Értem a jelentését, és másoknak is el tudnám magyarázni	Értem a jelentését, és másoknak is el tudnám magyarázni	Nem ismerem a jelentését, de szeretném megismerni	Nem ismerem a jelentését, de szeretném megismerni	Értem a jelentését, és másoknak is el tudnám magyarázni	Többé-kevésbé értem a jelentését	Többé-kevésbé értem a jelentését	Nem ismerem a jelentését, de szeretném megismerni	Értem a jelentését, és másoknak is el tudnám magyarázni	Értem a jelentését, és másoknak is el tudnám magyarázni	Értem a jelentését, és másoknak is el tudnám magyarázni
231	https://online-kerdoiv.com/index/view/hash/f505d52a49dd686dada6511e6d93f5bb/r/xaJrCIN2ToulzEtS4VnDQduznew3L1YSSlaSSnMpPPluSSAfUGIEzhL3bPxx9lxjnmPWOwQVf0bBFamaRELqYNeLPPluSSEOJR6Zxk4wpluZQMEeaMnyPPluSSdRJAHYG0afSegTvcz3TbWgypQgSSePPrPmmM2zHhEXsCc9H13xdfcFRzCVRvIZvN7q3sJKfFl8%3D	Nő	Semmelweis Egyetem		Alapképzési (Bsc)	Ápoló (Bsc)		Levelezős	Első	Igen	Nem	Igen	Igen	Naponta	Igen	Igen	Igen		Google			Pubmed/Medline			Egészségügyi szakemberek véleményének megismerése	Nem		Igen	a 3.-4. évfolyamon	Nem, sőt, olvastam már olyan forrást is, ami egyéb (nem angol vagy magyar) nyelven íródott	Átlagos (3)	Átlagos (3)	Valamennyire értek hozzá (2)	Gyenge (1)	Valamennyire értek hozzá (2)	Átlagosnál jobb (4)	Többé-kevésbé értem a jelentését	Nem ismerem a jelentését, de szeretném megismerni	Többé-kevésbé értem a jelentését	Többé-kevésbé értem a jelentését	Nem ismerem a jelentését, de szeretném megismerni	Nem ismerem a jelentését, de szeretném megismerni	Többé-kevésbé értem a jelentését	Nem ismerem a jelentését, de szeretném megismerni	Nem ismerem a jelentését, de szeretném megismerni	Nem ismerem a jelentését, de szeretném megismerni	Többé-kevésbé értem a jelentését	Többé-kevésbé értem a jelentését	Többé-kevésbé értem a jelentését
232	https://online-kerdoiv.com/index/view/hash/f505d52a49dd686dada6511e6d93f5bb/r/peSSlaSSS9zeB7pB57oejh84778I7n2PPluSS7J4j2dKvBVxGp8ZgYOMhKnzG5lGPPluSSP3fCbHfmBHf7SM8AOwKqS7VWqvjZLRbDuNOXRxLDjQGJr0Gc9VmHsFkQ9rSSlaSSlkGP5EmP1Z780PPluSSSSePP1D7TPPluSS62u45Sm1HMvp4ZKdVWUxPPluSSkcJI7uqOZhiwLp3SSlaSSc%3D	Nő	Semmelweis Egyetem		Alapképzési (Bsc)	Szülésznő (Bsc)		Levelezős	Harmadik	Nem	Nem	Nem		Hetente	Igen	Igen	Igen		Google			Pubmed/Medline			Elektronikus folyóiratok	Igen	Igen	Igen	a 3.-4. évfolyamon	Nem, az angol és magyar nyelvű forrásokat egyaránt elolvasom	Átlagosnál jobb (4)	Átlagosnál jobb (4)	Átlagos (3)	Valamennyire értek hozzá (2)	Valamennyire értek hozzá (2)	Átlagos (3)	Értem a jelentését, és másoknak is el tudnám magyarázni	Értem a jelentését, és másoknak is el tudnám magyarázni	Többé-kevésbé értem a jelentését	Többé-kevésbé értem a jelentését	Többé-kevésbé értem a jelentését	Többé-kevésbé értem a jelentését	Többé-kevésbé értem a jelentését	Nem ismerem a jelentését, de szerintem nem is hasznos számomra	Nem ismerem a jelentését, de szerintem nem is hasznos számomra	Nem ismerem a jelentését, de szerintem nem is hasznos számomra	Többé-kevésbé értem a jelentését	Többé-kevésbé értem a jelentését	Többé-kevésbé értem a jelentését
233	https://online-kerdoiv.com/index/view/hash/f505d52a49dd686dada6511e6d93f5bb/r/plDSSlaSSCg3APPluSSi3bupYSSSlaSSEtPPluSS6rSSlaSSAgc6oAbXVoCG74NRkDfljp3ofwj5m431TVt71fC7F5WrcbeWSWAYrnaHhJlPPluSSLtbtSSlaSSQrdsyG9thvvhM1HPPluSSRN07KzyHGsqCmyplXaFMN3OjSSePPSwU8qjCUPpSxqwa2jzy35ZjGR78Ui67TKUdgSsAfpuo%3D	Nő	Semmelweis Egyetem		Alapképzési (Bsc)	Védőnő (Bsc)		Nappali	Harmadik	Nem	Nem	Nem		Soha	Igen	Igen	Igen		Google		Wikipedia				Elektonikus média	Nem		Nem		Igen, csak magyarul szeretek olvasni	Gyenge (1)	Haladó szintű (5)	Gyenge (1)	Gyenge (1)	Átlagos (3)	Haladó szintű (5)	Értem a jelentését, és másoknak is el tudnám magyarázni	Nem ismerem a jelentését, de szeretném megismerni	Értem a jelentését, és másoknak is el tudnám magyarázni	Értem a jelentését, és másoknak is el tudnám magyarázni	Értem a jelentését, és másoknak is el tudnám magyarázni	Nem ismerem a jelentését, de szeretném megismerni	Értem a jelentését, és másoknak is el tudnám magyarázni	Értem a jelentését, és másoknak is el tudnám magyarázni	Értem a jelentését, és másoknak is el tudnám magyarázni	Többé-kevésbé értem a jelentését	Értem a jelentését, és másoknak is el tudnám magyarázni	Értem a jelentését, és másoknak is el tudnám magyarázni	Értem a jelentését, és másoknak is el tudnám magyarázni
234	https://online-kerdoiv.com/index/view/hash/f505d52a49dd686dada6511e6d93f5bb/r/6tSnQ4VxB0ZslanrDqv3BKNgpVUZyLIEzuQwPdaHmYkFQFjQi4SSlaSSfqocT0E4w6HDvUPPluSSYdLe8QqMh5Oekvo2IRmPG0PgAdyrpDTaUho1eajKdGJCScxiYDvHuXEaSSlaSS2QCJ7SSePPcgK6ukpSGrSSlaSSD9e02TdcAnsBjsIIGq3KDhafhQSSlaSSksn7g%3D	Nő	Semmelweis Egyetem		Alapképzési (Bsc)	Gyógytornász (Bsc)		Nappali	Második	Igen	Nem	Igen	Igen	Havonta vagy ritkábban	Igen	Igen	Igen		Google		Wikipedia	Pubmed/Medline			Nyomtatott szakkönyvek	Nem		Igen	a 3.-4. évfolyamon	Nem, az angol és magyar nyelvű forrásokat egyaránt elolvasom	Valamennyire értek hozzá (2)	Valamennyire értek hozzá (2)	Átlagos (3)	Valamennyire értek hozzá (2)	Valamennyire értek hozzá (2)	Átlagos (3)	Többé-kevésbé értem a jelentését	Nem ismerem a jelentését, de szeretném megismerni	Értem a jelentését, és másoknak is el tudnám magyarázni	Értem a jelentését, és másoknak is el tudnám magyarázni	Többé-kevésbé értem a jelentését	Többé-kevésbé értem a jelentését	Többé-kevésbé értem a jelentését	Többé-kevésbé értem a jelentését	Nem ismerem a jelentését, de szeretném megismerni	Nem ismerem a jelentését, de szeretném megismerni	Többé-kevésbé értem a jelentését	Többé-kevésbé értem a jelentését	Nem ismerem a jelentését, de szeretném megismerni
235	https://online-kerdoiv.com/index/view/hash/f505d52a49dd686dada6511e6d93f5bb/r/l1Cfb9TPPluSSopQhPPluSSTolSSlaSS5uY0wJWfY0swVbZJtCc94iKudF1KsR3mmrUTOPPluSSU3he6pynSSlaSSBnd92MPMPy3IAhYoc6gKDKdTfUD3vsbRAadFJa70Bo3IUY7wnXzqE2isAYYucIxpSSePPMoPPluSSrGHUDtV9Xs9c8HuXPPluSSEf22puU5EoU34NX5cA9UTec%3D	Nő	Semmelweis Egyetem		Alapképzési (Bsc)	Szülésznő (Bsc)		Nappali	Első	Nem	Nem	Nem		Havonta vagy ritkábban	Igen	Igen	Igen		Google			Pubmed/Medline	Medscape		Nyomtatott folyóiratok	Igen	Igen	Igen	az 1.-2. évfolyamon	Nem, az angol és magyar nyelvű forrásokat egyaránt elolvasom	Átlagos (3)	Átlagosnál jobb (4)	Gyenge (1)	Gyenge (1)	Valamennyire értek hozzá (2)	Átlagos (3)	Nincs véleményem ezzel kapcsolatosan	Nincs véleményem ezzel kapcsolatosan	Nincs véleményem ezzel kapcsolatosan	Nincs véleményem ezzel kapcsolatosan	Nincs véleményem ezzel kapcsolatos	Nincs véleményem ezzel kapcsolatos	Nincs véleményem ezzel kapcsolatos	Értem a jelentését, és másoknak is el tudnám magyarázni	Értem a jelentését, és másoknak is el tudnám magyarázni	Értem a jelentését, és másoknak is el tudnám magyarázni	Nem ismerem a jelentését, de szeretném megismerni	Értem a jelentését, és másoknak is el tudnám magyarázni	Nem ismerem a jelentését, de szeretném megismerni
236	https://online-kerdoiv.com/index/view/hash/f505d52a49dd686dada6511e6d93f5bb/r/LHlvxF1BNSSlaSSur5PPluSS50gooO5ZLhSSlaSSUSSlaSSclXzrMiHDQZkxPPluSSvHHtaWPPluSSg4ZWPPluSSwkeb46bbr5dPJ6f5h0LNDTuQxpSSlaSSPsirCg9JdLfyFFuXwdJahsJ6gp5m7PY5cSSlaSSiSCS5oIcjHcphuSSePP3pbZcPvFbp0kp79NFnjcH8XPPluSSKPdlcPPluSSHCrINwWSFuCTw%3D	Nő	Semmelweis Egyetem		Alapképzési (Bsc)	Mentőtiszt (Bsc)		Nappali	Második	Nem	Nem	Nem		Havonta vagy ritkábban	Igen	Igen	Igen		Google	Google Scholar	Wikipedia	Pubmed/Medline	Medscape		Nyomtatott szakkönyvek	Nem		Igen	az 1.-2. évfolyamon	Nem, az angol és magyar nyelvű forrásokat egyaránt elolvasom	Átlagosnál jobb (4)	Valamennyire értek hozzá (2)	Valamennyire értek hozzá (2)	Gyenge (1)	Valamennyire értek hozzá (2)	Átlagosnál jobb (4)	Többé-kevésbé értem a jelentését	Nem ismerem a jelentését, de szeretném megismerni	Értem a jelentését, és másoknak is el tudnám magyarázni	Értem a jelentését, és másoknak is el tudnám magyarázni	Többé-kevésbé értem a jelentését	Többé-kevésbé értem a jelentését	Értem a jelentését, és másoknak is el tudnám magyarázni	Értem a jelentését, és másoknak is el tudnám magyarázni	Értem a jelentését, és másoknak is el tudnám magyarázni	Többé-kevésbé értem a jelentését	Értem a jelentését, és másoknak is el tudnám magyarázni	Értem a jelentését, és másoknak is el tudnám magyarázni	Értem a jelentését, és másoknak is el tudnám magyarázni
237	https://online-kerdoiv.com/index/view/hash/f505d52a49dd686dada6511e6d93f5bb/r/85gSSlaSSSRQofPtQywrk4P2CYkSSlaSSiMPo4ZxoPPluSSIeNnqBtMXeWAkf2WRvV60kLXVl7pHOH6hFi4UUmVS6bXoaKo9pvZsa9kDP4Xp7yeZJRTIaWRJplMIMTTfp3tGmGRI2JpwPYySSePP991yApPPluSSI9uZybYlc4VMsmFk9Sv4FNcqY3i2NnHqWPPluSSxE%3D	Nő	Semmelweis Egyetem		Alapképzési (Bsc)	Dietetikus (Bsc)		Nappali	Első	Nem	Nem	Nem		Havonta vagy ritkábban	Igen	Igen	Nem		Google			Pubmed/Medline			Elektronikus folyóiratok	Nem		Igen	a 3.-4. évfolyamon	Nem, az angol és magyar nyelvű forrásokat egyaránt elolvasom	Valamennyire értek hozzá (2)	Haladó szintű (5)	Valamennyire értek hozzá (2)	Átlagos (3)	Átlagos (3)	Átlagosnál jobb (4)	Többé-kevésbé értem a jelentését	Többé-kevésbé értem a jelentését	Értem a jelentését, és másoknak is el tudnám magyarázni	Értem a jelentését, és másoknak is el tudnám magyarázni	Nem ismerem a jelentését, de szeretném megismerni	Nem ismerem a jelentését, de szeretném megismerni	Többé-kevésbé értem a jelentését	Többé-kevésbé értem a jelentését	Nem ismerem a jelentését, de szeretném megismerni	Nem ismerem a jelentését, de szeretném megismerni	Értem a jelentését, és másoknak is el tudnám magyarázni	Többé-kevésbé értem a jelentését	Nem ismerem a jelentését, de szeretném megismerni
238	https://online-kerdoiv.com/index/view/hash/f505d52a49dd686dada6511e6d93f5bb/r/se2VfWvev546uLMTpYv3c1VSSlaSSjSSlaSSnFe854mSXmwBZ5Sb6x3MRdmuyvUZkRCM4G94dAiFyJ8vYwNflSSlaSSLFTwX5Dr0DPIcUWXIIgq5dIQGgbGgJFweFaR51RdIFtQoGmdrQNDSSePPPPluSSnYJV0tUk39Uauz2CPPluSSi6EuvePfTxhRt3sSafNCm1nOI%3D	Nő	Semmelweis Egyetem		Alapképzési (Bsc)	Szülésznő (Bsc)		Nappali	Első	Nem	Nem	Igen	Nem	Havonta vagy ritkábban	Igen	Igen	Igen		Google		Wikipedia	Pubmed/Medline			Elektronikus szakkönyvek	Nem		Igen	a 3.-4. évfolyamon	Nem, az angol és magyar nyelvű forrásokat egyaránt elolvasom	Átlagos (3)	Haladó szintű (5)	Valamennyire értek hozzá (2)	Gyenge (1)	Átlagos (3)	Átlagos (3)	Többé-kevésbé értem a jelentését	Többé-kevésbé értem a jelentését	Értem a jelentését, és másoknak is el tudnám magyarázni	Értem a jelentését, és másoknak is el tudnám magyarázni	Többé-kevésbé értem a jelentését	Többé-kevésbé értem a jelentését	Értem a jelentését, és másoknak is el tudnám magyarázni	Értem a jelentését, és másoknak is el tudnám magyarázni	Nem ismerem a jelentését, de szeretném megismerni	Többé-kevésbé értem a jelentését	Értem a jelentését, és másoknak is el tudnám magyarázni	Többé-kevésbé értem a jelentését	Többé-kevésbé értem a jelentését
239	https://online-kerdoiv.com/index/view/hash/f505d52a49dd686dada6511e6d93f5bb/r/KP9UdKGlSqTwZBp4mPPluSSqxK4Neggk7QWSNlYx8V2pwapQOFxg7mTXWqzH2vYHVuQE7Zh4SOgLnlcbDkaCf5FeiAwb6jzn8idnR8gu1rF8PPluSSfHLirWUjEkZF6oTSSlaSSk19BGW6bSSePPcNcXe8GrVe52j1SSlaSSOyzbRlIuZXP5ybHzPqf9hvNwlKPPluSSw%3D	Nő	Semmelweis Egyetem		Alapképzési (Bsc)	Ápoló (Bsc)		Nappali	Első	Igen	Igen	Nem		Hetente	Nem	Igen	Igen		Google			Pubmed/Medline	Medscape	Cochrane Library	Elektronikus szakkönyvek	Igen	Igen	Igen	az 1.-2. évfolyamon	Nem, az angol és magyar nyelvű forrásokat egyaránt elolvasom	Átlagosnál jobb (4)	Átlagos (3)	Valamennyire értek hozzá (2)	Gyenge (1)	Valamennyire értek hozzá (2)	Átlagosnál jobb (4)	Értem a jelentését, és másoknak is el tudnám magyarázni	Többé-kevésbé értem a jelentését	Értem a jelentését, és másoknak is el tudnám magyarázni	Értem a jelentését, és másoknak is el tudnám magyarázni	Nem ismerem a jelentését, de szeretném megismerni	Nem ismerem a jelentését, de szeretném megismerni	Többé-kevésbé értem a jelentését	Értem a jelentését, és másoknak is el tudnám magyarázni	Többé-kevésbé értem a jelentését	Nem ismerem a jelentését, de szeretném megismerni	Értem a jelentését, és másoknak is el tudnám magyarázni	Többé-kevésbé értem a jelentését	Nem ismerem a jelentését, de szeretném megismerni
240	https://online-kerdoiv.com/index/view/hash/f505d52a49dd686dada6511e6d93f5bb/r/fdZCmcP8yk914tJ1TTd3JpxuFSZemP911nDKYFOmwZ7P4LVuhN4H0gSSlaSSuSVAawaBLkKcT3XYBjZRqdhqtxJi7ybJJVrZ5VPPluSSYcOZiIpWJnqqeTuiSSlaSSZFI8V4JdHW7Bu7A1SSlaSSSSePPanqOHfxPPluSSyn8NFV2lhdZPBnMxU4Ri3D8roFtWBTsOLZ0%3D	Nő	Semmelweis Egyetem		Alapképzési (Bsc)	Szülésznő (Bsc)		Nappali	Harmadik	Nem	Nem	Igen	Nem	Havonta vagy ritkábban	Igen	Igen	Nem		Google		Wikipedia		Medscape		Oktatási jegyzetek	Nem		Igen	a 3.-4. évfolyamon	Igen, csak magyarul szeretek olvasni	Átlagos (3)	Átlagosnál jobb (4)	Valamennyire értek hozzá (2)	Gyenge (1)	Valamennyire értek hozzá (2)	Átlagosnál jobb (4)	Nem ismerem a jelentését, de szeretném megismerni	Többé-kevésbé értem a jelentését	Értem a jelentését, és másoknak is el tudnám magyarázni	Többé-kevésbé értem a jelentését	Nem ismerem a jelentését, de szeretném megismerni	Nem ismerem a jelentését, de szeretném megismerni	Többé-kevésbé értem a jelentését	Többé-kevésbé értem a jelentését	Nem ismerem a jelentését, de szerintem nem is hasznos számomra	Nem ismerem a jelentését, de szeretném megismerni	Többé-kevésbé értem a jelentését	Többé-kevésbé értem a jelentését	Többé-kevésbé értem a jelentését
241	https://online-kerdoiv.com/index/view/hash/f505d52a49dd686dada6511e6d93f5bb/r/XBO6FRlMzsrM0GquHyxKIVF68AYX8PPluSSp22d5z9Ih0dnY1WKh0PNxD3pcmJEcB6OG6MzanTmfe2HI6eiMUzBQLwkQcGublCNMMn4oL8XKoqzWtSNHvZKkILSXr5e6zmAZYSSePPtup1PPluSSl7JHY1us3r9fgPPluSSKeOulBPjKQNzKYijklc2wZWw%3D	Nő	Semmelweis Egyetem		Alapképzési (Bsc)	Ápoló (Bsc)		Nappali	Negyedik	Igen	Nem	Nem		Havonta vagy ritkábban	Igen	Igen	Igen		Google	Google Scholar	Wikipedia	Pubmed/Medline			Nyomtatott szakkönyvek	Igen	Igen	Igen	a 3.-4. évfolyamon	Igen, csak magyarul szeretek olvasni	Átlagosnál jobb (4)	Átlagosnál jobb (4)	Valamennyire értek hozzá (2)	Valamennyire értek hozzá (2)	Átlagos (3)	Átlagosnál jobb (4)	Értem a jelentését, és másoknak is el tudnám magyarázni	Többé-kevésbé értem a jelentését	Értem a jelentését, és másoknak is el tudnám magyarázni	Értem a jelentését, és másoknak is el tudnám magyarázni	Többé-kevésbé értem a jelentését	Nem ismerem a jelentését, de szeretném megismerni	Nem ismerem a jelentését, de szeretném megismerni	Értem a jelentését, és másoknak is el tudnám magyarázni	Többé-kevésbé értem a jelentését	Nem ismerem a jelentését, de szeretném megismerni	Értem a jelentését, és másoknak is el tudnám magyarázni	Értem a jelentését, és másoknak is el tudnám magyarázni	Többé-kevésbé értem a jelentését
242	https://online-kerdoiv.com/index/view/hash/f505d52a49dd686dada6511e6d93f5bb/r/IcdS0PPluSSIEFIaWBytlpk1dQ2gNCNEZ900bteuevk9fouleTnQk9g2KYgT03HAICAaLZDDRunQ6C6dcSSlaSSBvGq7rFCYIL1PPluSS2ZHjBbmcu53MjmJLty79SGydgPeSoBnq6dnIhXSSePPOYHdqg7LDYrcM5RHltfBwTpPPluSSXyBRnsOPPluSSFMrGUPPluSSRtnXA%3D	Nő	Semmelweis Egyetem		Alapképzési (Bsc)	Védőnő (Bsc)		Nappali	Harmadik	Nem	Nem	Igen	Igen	Havonta vagy ritkábban	Igen	Igen	Igen		Google			Pubmed/Medline			Szakmai irányelvek	Nem		Igen	a 3.-4. évfolyamon	Igen, csak magyarul szeretek olvasni	Átlagos (3)	Átlagos (3)	Valamennyire értek hozzá (2)	Valamennyire értek hozzá (2)	Valamennyire értek hozzá (2)	Átlagos (3)	Értem a jelentését, és másoknak is el tudnám magyarázni	Többé-kevésbé értem a jelentését	Többé-kevésbé értem a jelentését	Többé-kevésbé értem a jelentését	Többé-kevésbé értem a jelentését	Nem ismerem a jelentését, de szeretném megismerni	Nem ismerem a jelentését, de szeretném megismerni	Többé-kevésbé értem a jelentését	Nem ismerem a jelentését, de szeretném megismerni	Nem ismerem a jelentését, de szeretném megismerni	Többé-kevésbé értem a jelentését	Értem a jelentését, és másoknak is el tudnám magyarázni	Értem a jelentését, és másoknak is el tudnám magyarázni
243	https://online-kerdoiv.com/index/view/hash/f505d52a49dd686dada6511e6d93f5bb/r/RPPluSSXmIp5jGKCdUJCpOhAFxHoS8dBUGVwGLsNpG0SSlaSS1PPluSSSSlaSSg8l7qID3IBnKoENWzXfyKDETBNuRWoI5hcPmysIPlNGrFgLUvaSSlaSSfS2i0YD1zuLuhFqNFgPPluSSwufPPluSS91XikHmsDXVsSSePPLnPm5ujnDiQACV6XZ2XqeiKSSlaSShjxvJSkOYPPluSSKgAjLz0l4%3D	Nő	Semmelweis Egyetem		Alapképzési (Bsc)	Védőnő (Bsc)		Nappali	Harmadik	Nem	Nem	Igen	Nem	Havonta vagy ritkábban	Igen	Igen	Igen		Google	Google Scholar	Wikipedia				Egészségügyi szakemberek véleményének megismerése	Nem		Igen	a 3.-4. évfolyamon	Igen, csak magyarul szeretek olvasni	Átlagosnál jobb (4)	Haladó szintű (5)	Átlagosnál jobb (4)	Átlagos (3)	Átlagosnál jobb (4)	Valamennyire értek hozzá (2)	Értem a jelentését, és másoknak is el tudnám magyarázni	Nem ismerem a jelentését, de szeretném megismerni	Értem a jelentését, és másoknak is el tudnám magyarázni	Értem a jelentését, és másoknak is el tudnám magyarázni	Értem a jelentését, és másoknak is el tudnám magyarázni	Nem ismerem a jelentését, de szeretném megismerni	Értem a jelentését, és másoknak is el tudnám magyarázni	Értem a jelentését, és másoknak is el tudnám magyarázni	Nem ismerem a jelentését, de szeretném megismerni	Többé-kevésbé értem a jelentését	Nem ismerem a jelentését, de szeretném megismerni	Értem a jelentését, és másoknak is el tudnám magyarázni	Többé-kevésbé értem a jelentését
244	https://online-kerdoiv.com/index/view/hash/f505d52a49dd686dada6511e6d93f5bb/r/zvsRt7kylx9Uqa1t1AkSSlaSStzsz9qZdCRVSSlaSSsv7qZuzTC6UaLmeivZGbESSlaSScoGIZWSpsVXPqD0BtvTJfe8RtHArd5bv6K7DioTJKqHk1eNTtPPluSSut5HdHX6jDkk6CWCODOfFbIXSSePPCHdzbrTDPPluSSXcu9yh1bg6tlCNDgNO8WAojhOsOJcydaJ8%3D	Férfi	Semmelweis Egyetem		Alapképzési (Bsc)	Ápoló (Bsc)		Levelezős	Első	Igen	Nem	Nem		Havonta vagy ritkábban	Igen	Igen	Igen		Google						Nyomtatott szakkönyvek	Igen	Igen	Igen	a 3.-4. évfolyamon	Igen, csak magyarul szeretek olvasni	Átlagos (3)	Átlagos (3)	Valamennyire értek hozzá (2)	Átlagos (3)	Haladó (5)	Haladó szintű (5)	Értem a jelentését, és másoknak is el tudnám magyarázni	Értem a jelentését, és másoknak is el tudnám magyarázni	Értem a jelentését, és másoknak is el tudnám magyarázni	Értem a jelentését, és másoknak is el tudnám magyarázni	Nem ismerem a jelentését, de szeretném megismerni	Nem ismerem a jelentését, de szeretném megismerni	Nem ismerem a jelentését, de szeretném megismerni	Nincs véleményem ezzel kapcsolatosan	Nincs véleményem ezzel kapcsolatosan	Nincs véleményem ezzel kapcsolatosan	Többé-kevésbé értem a jelentését	Többé-kevésbé értem a jelentését	Többé-kevésbé értem a jelentését
245	https://online-kerdoiv.com/index/view/hash/f505d52a49dd686dada6511e6d93f5bb/r/Fjg3cZHKp2jyNrEgk5g3asw3gSHSU9HQlpysqfSSlaSSKAUU19WPPluSSFL5iWUCxlpA6wnQiPPluSSKsyr0EdrYQFRxrlXNumgS7hius4SOdoh97Ye7f9QDs6S0HRLdPPluSSuB3TBUN1Z4PPluSSQ7iSSePPsTMbSSlaSS3R9pWVtbAJ1Uj1g2jLTrO354wyekOy0QFsbipA%3D	Nő	Semmelweis Egyetem		Alapképzési (Bsc)	Szülésznő (Bsc)		Nappali	Negyedik	Nem	Nem	Igen	Igen	Havonta vagy ritkábban	Igen	Igen	Nem		Google		Wikipedia	Pubmed/Medline			Nyomtatott szakkönyvek	Nem		Igen	az 1.-2. évfolyamon	Nem, az angol és magyar nyelvű forrásokat egyaránt elolvasom	Átlagos (3)	Átlagos (3)	Gyenge (1)	Gyenge (1)	Valamennyire értek hozzá (2)	Átlagos (3)	Többé-kevésbé értem a jelentését	Nem ismerem a jelentését, de szeretném megismerni	Értem a jelentését, és másoknak is el tudnám magyarázni	Értem a jelentését, és másoknak is el tudnám magyarázni	Nem ismerem a jelentését, de szeretném megismerni	Nem ismerem a jelentését, de szeretném megismerni	Többé-kevésbé értem a jelentését	Többé-kevésbé értem a jelentését	Nem ismerem a jelentését, de szeretném megismerni	Nem ismerem a jelentését, de szeretném megismerni	Értem a jelentését, és másoknak is el tudnám magyarázni	Értem a jelentését, és másoknak is el tudnám magyarázni	Többé-kevésbé értem a jelentését
246	https://online-kerdoiv.com/index/view/hash/f505d52a49dd686dada6511e6d93f5bb/r/xvqy88Ca87DIzuveg2rZXqcHXXyAP9PPluSS8t0EPvjv9TZJfyTBnHWK7RLuGfWYZuZ0PTd9PPluSS7hDSwBWKbToXbb7Ip0Rc6ZtLrco6neYkxKNqDN4HkHPWx1mqlFmZ9YCVCPG2SSePPZbWntTGeO2xFSdD4S7yWo39OBy3Ol4clIN5XhsS5hpo%3D	Nő	Semmelweis Egyetem		Alapképzési (Bsc)	Ápoló (Bsc)		Nappali	Második	Nem	Nem	Nem		Soha	Igen	Igen	Igen		Google						Oktatási jegyzetek	Nem		Igen	a 3.-4. évfolyamon	Igen, csak magyarul szeretek olvasni	Átlagos (3)	Haladó szintű (5)	Átlagos (3)	Valamennyire értek hozzá (2)	Haladó (5)	Átlagosnál jobb (4)	Nem ismerem a jelentését, de szeretném megismerni	Nem ismerem a jelentését, de szeretném megismerni	Nincs véleményem ezzel kapcsolatosan	Nincs véleményem ezzel kapcsolatosan	Nem ismerem a jelentését, de szerintem nem is hasznos számomra	Nem ismerem a jelentését, de szerintem nem is hasznos számomra	Nem ismerem a jelentését, de szerintem nem is hasznos számomra	Értem a jelentését, és másoknak is el tudnám magyarázni	Értem a jelentését, és másoknak is el tudnám magyarázni	Értem a jelentését, és másoknak is el tudnám magyarázni	Nem ismerem a jelentését, de szerintem nem is hasznos számomra	Többé-kevésbé értem a jelentését	Többé-kevésbé értem a jelentését
247	https://online-kerdoiv.com/index/view/hash/f505d52a49dd686dada6511e6d93f5bb/r/g5KNuMqPPluSSGPQShEtaHuSSlaSSqrJtQ2LXPPluSSWYsk0hyrhHWFLnONfz3Rl4UfuO7kHNgVTPjxzPPluSSQH5fVScivXILfQTx0l0GGNd0jG8BwF3xtTN3lJgPPluSS9lkOLMJvAALNjJRcv9DPPluSSgcSSePPGgOaMsyFi9DweNSSlaSSqm4y3CtwVP9letllOl8vladtLC3Y%3D	Nő	Semmelweis Egyetem		Mesterképzési (Msc)	Fizioterápia (Msc)		Nappali	Első	Nem	Igen	Nem		Havonta vagy ritkábban	Igen	Igen	Nem		Google	Google Scholar		Pubmed/Medline		Cochrane Library	Elektronikus folyóiratok	Igen	Igen	Igen	a 3.-4. évfolyamon	Nem, az angol és magyar nyelvű forrásokat egyaránt elolvasom	Átlagosnál jobb (4)	Átlagos (3)	Valamennyire értek hozzá (2)	Valamennyire értek hozzá (2)	Valamennyire értek hozzá (2)	Valamennyire értek hozzá (2)	Többé-kevésbé értem a jelentését	Többé-kevésbé értem a jelentését	Értem a jelentését, és másoknak is el tudnám magyarázni	Értem a jelentését, és másoknak is el tudnám magyarázni	Nem ismerem a jelentését, de szeretném megismerni	Nem ismerem a jelentését, de szerintem nem is hasznos számomra	Értem a jelentését, és másoknak is el tudnám magyarázni	Értem a jelentését, és másoknak is el tudnám magyarázni	Értem a jelentését, és másoknak is el tudnám magyarázni	Nem ismerem a jelentését, de szeretném megismerni	Többé-kevésbé értem a jelentését	Értem a jelentését, és másoknak is el tudnám magyarázni	Értem a jelentését, és másoknak is el tudnám magyarázni
248	https://online-kerdoiv.com/index/view/hash/f505d52a49dd686dada6511e6d93f5bb/r/t4ytdpPQNkm0d5XzocfUsPM1TZ6KYhL4reXPhkhH5nBNxsSSlaSSRHBLYc4VAiwdSJHb9mJlTysJ1iCjDJrL0lxSSlaSSMci13SSlaSSFCgVXLZMvuSSlaSSktm2bQYQaQspIIaFyq2vx2hVhGvrSSePPfxSSlaSSVlXfaRv9NKx85sIhfl2AFyrpPPluSSCHBn0qULlaBXwVI%3D	Nő	Semmelweis Egyetem		Alapképzési (Bsc)	Gyógytornász (Bsc)		Nappali	Első	Nem	Nem	Nem		Havonta vagy ritkábban	Igen	Igen	Igen		Google		Wikipedia				Elektronikus folyóiratok	Nem		Igen	a 3.-4. évfolyamon	Nem, az angol és magyar nyelvű forrásokat egyaránt elolvasom	Átlagos (3)	Átlagos (3)	Valamennyire értek hozzá (2)	Valamennyire értek hozzá (2)	Valamennyire értek hozzá (2)	Átlagos (3)	Többé-kevésbé értem a jelentését	Nem ismerem a jelentését, de szeretném megismerni	Értem a jelentését, és másoknak is el tudnám magyarázni	Értem a jelentését, és másoknak is el tudnám magyarázni	Nem ismerem a jelentését, de szeretném megismerni	Többé-kevésbé értem a jelentését	Többé-kevésbé értem a jelentését	Értem a jelentését, és másoknak is el tudnám magyarázni	Nem ismerem a jelentését, de szeretném megismerni	Nem ismerem a jelentését, de szeretném megismerni	Értem a jelentését, és másoknak is el tudnám magyarázni	Többé-kevésbé értem a jelentését	Többé-kevésbé értem a jelentését
249	https://online-kerdoiv.com/index/view/hash/f505d52a49dd686dada6511e6d93f5bb/r/MyTNt9zG90hQLxsz31TS8GyBbpZaBTvbbT48ZxTxPPluSSPx3DYTuIFCHNa1xrEgRavyxm6EIZXSiviUkac9RPPluSSH7D8lA9TLAv9LTcf9mpdPPluSSzyz6Yj0pwRC5iExA4GefbIkmA4SSePPhqIKToynRAGetPuuAgR59oJx8TCX9SfPPluSStXCtE7dKaSE%3D	Nő	Semmelweis Egyetem		Alapképzési (Bsc)	Védőnő (Bsc)		Nappali	Első	Nem	Nem	Igen	Nem	Soha	Igen	Igen	Igen		Google		Wikipedia				Egészségügyi szakemberek véleményének megismerése	Nem		Igen	a 3.-4. évfolyamon	Igen, csak magyarul szeretek olvasni	Átlagos (3)	Átlagosnál jobb (4)	Átlagos (3)	Valamennyire értek hozzá (2)	Átlagos (3)	Átlagosnál jobb (4)	Értem a jelentését, és másoknak is el tudnám magyarázni	Értem a jelentését, és másoknak is el tudnám magyarázni	Értem a jelentését, és másoknak is el tudnám magyarázni	Többé-kevésbé értem a jelentését	Többé-kevésbé értem a jelentését	Többé-kevésbé értem a jelentését	Értem a jelentését, és másoknak is el tudnám magyarázni	Értem a jelentését, és másoknak is el tudnám magyarázni	Nem ismerem a jelentését, de szeretném megismerni	Többé-kevésbé értem a jelentését	Értem a jelentését, és másoknak is el tudnám magyarázni	Értem a jelentését, és másoknak is el tudnám magyarázni	Nem ismerem a jelentését, de szeretném megismerni
250	https://online-kerdoiv.com/index/view/hash/f505d52a49dd686dada6511e6d93f5bb/r/XdwLVPPluSSRqi1vDyVDS9NHbXZeIqCXprpcN4PPluSSoEz2EoT4YYmvFgmrCGYHb91SSlaSSBg8PIGUjjEQ6k86XSSlaSSTC4cHbyZqniYTtfSb1tCyCHviZpWQXSSlaSSIaASkPPluSSPotFPPluSSQJnZGAyk5phSSePPcpQ19cSCnTaFdQKdjv5H7ttQBF8ugSSlaSSxSSlaSStU5YjfkwCIo%3D	Nő	Semmelweis Egyetem		Alapképzési (Bsc)	Gyógytornász (Bsc)		Nappali	Harmadik	Nem	Nem	Igen	Igen	Havonta vagy ritkábban	Igen	Igen	Igen		Google		Wikipedia				Elektronikus szakkönyvek	Nem		Igen	a 3.-4. évfolyamon	Nem, az angol és magyar nyelvű forrásokat egyaránt elolvasom	Átlagos (3)	Átlagos (3)	Valamennyire értek hozzá (2)	Valamennyire értek hozzá (2)	Valamennyire értek hozzá (2)	Haladó szintű (5)	Értem a jelentését, és másoknak is el tudnám magyarázni	Többé-kevésbé értem a jelentését	Értem a jelentését, és másoknak is el tudnám magyarázni	Értem a jelentését, és másoknak is el tudnám magyarázni	Többé-kevésbé értem a jelentését	Többé-kevésbé értem a jelentését	Értem a jelentését, és másoknak is el tudnám magyarázni	Értem a jelentését, és másoknak is el tudnám magyarázni	Értem a jelentését, és másoknak is el tudnám magyarázni	Többé-kevésbé értem a jelentését	Értem a jelentését, és másoknak is el tudnám magyarázni	Értem a jelentését, és másoknak is el tudnám magyarázni	Értem a jelentését, és másoknak is el tudnám magyarázni
251	https://online-kerdoiv.com/index/view/hash/f505d52a49dd686dada6511e6d93f5bb/r/gS2fmvYeiwek5bFNLxJNCCYbvVBshXe14sgO9uoIqVi7Hd8KqT7hU00FUMoTFPPluSSth7aJypdt63yPESSlaSSLNrWJpH71YfgyDpPPluSSpsiQBS9CQMt6a74C5R89HpW3gCKLBW6QaUCSSePP3IQxSSlaSSosD0Z0FaqvoCQOkh5zSbxN4IgMqQ3b7H5RiQd8%3D	Nő	Semmelweis Egyetem		Alapképzési (Bsc)	Gyógytornász (Bsc)		Nappali	Első	Nem	Nem	Nem		Soha	Nem	Igen	Igen		Google						Egészségügyi szakemberek véleményének megismerése	Nem		Igen	az 1.-2. évfolyamon	Nem, az angol és magyar nyelvű forrásokat egyaránt elolvasom	Átlagos (3)	Átlagosnál jobb (4)	Átlagos (3)	Átlagos (3)	Átlagos (3)	Átlagos (3)	Többé-kevésbé értem a jelentését	Nem ismerem a jelentését, de szeretném megismerni	Többé-kevésbé értem a jelentését	Többé-kevésbé értem a jelentését	Nem ismerem a jelentését, de szeretném megismerni	Nem ismerem a jelentését, de szeretném megismerni	Nem ismerem a jelentését, de szeretném megismerni	Többé-kevésbé értem a jelentését	Nem ismerem a jelentését, de szeretném megismerni	Többé-kevésbé értem a jelentését	Nem ismerem a jelentését, de szeretném megismerni	Többé-kevésbé értem a jelentését	Többé-kevésbé értem a jelentését
252	https://online-kerdoiv.com/index/view/hash/f505d52a49dd686dada6511e6d93f5bb/r/vrvq7JWUEvnUuSQh8SSlaSSBgte78vdszFrbYt38PPluSSDidSSlaSS3Ikc5f9so0VPaBOV5pz1B5th8ERGWDe7nquevMXR4SVsMf80BQ6PPluSSwSSlaSStlzOCbTcSSlaSSYdZriF5e4cOG3oVk71enIoYpJSSePPpGIsoECiQ6Zh3sMDJU4B5HIXIN9PPluSSQCDOI5rh3bzpoSSlaSSw%3D	Nő	Semmelweis Egyetem		Alapképzési (Bsc)	Védőnő (Bsc)		Nappali	Első	Nem	Nem	Igen	Nem	Soha	Igen	Igen	Igen		Google	Google Scholar	Wikipedia				Egészségügyi szakemberek véleményének megismerése	Nem		Igen	a 3.-4. évfolyamon	Nem, az angol és magyar nyelvű forrásokat egyaránt elolvasom	Átlagosnál jobb (4)	Haladó szintű (5)	Átlagos (3)	Valamennyire értek hozzá (2)	Átlagos (3)	Átlagosnál jobb (4)	Értem a jelentését, és másoknak is el tudnám magyarázni	Értem a jelentését, és másoknak is el tudnám magyarázni	Értem a jelentését, és másoknak is el tudnám magyarázni	Értem a jelentését, és másoknak is el tudnám magyarázni	Nincs véleményem ezzel kapcsolatos	Nincs véleményem ezzel kapcsolatos	Értem a jelentését, és másoknak is el tudnám magyarázni	Értem a jelentését, és másoknak is el tudnám magyarázni	Többé-kevésbé értem a jelentését	Többé-kevésbé értem a jelentését	Értem a jelentését, és másoknak is el tudnám magyarázni	Értem a jelentését, és másoknak is el tudnám magyarázni	Értem a jelentését, és másoknak is el tudnám magyarázni
253	https://online-kerdoiv.com/index/view/hash/f505d52a49dd686dada6511e6d93f5bb/r/aRjMKV8L6pf7TcctSyqRSSlaSSGjluq5PPluSS9CJG4YuMoCSSlaSSBoM7HmW13NHurEFznjyQmA2XbZIJojx4afedvYqUTXDs0mjFdIgUJHyZHXSIzvvH0N4RfsqdqRdLttIkPPluSSnQFNI38DSSePP3TgWT8IwnvN87844gHiSSlaSSLruFy4sMpWJZ9HJ567VX6Vs%3D	Nő	Miskolci Egyetem		Alapképzési (Bsc)	Védőnő (Bsc)		Nappali	Harmadik	Nem	Igen	Nem		Havonta vagy ritkábban	Igen	Igen	Nem		Google				Medscape		Nyomtatott szakkönyvek	Nem		Igen	az 1.-2. évfolyamon	Igen, csak magyarul szeretek olvasni	Átlagosnál jobb (4)	Haladó szintű (5)	Valamennyire értek hozzá (2)	Átlagos (3)	Valamennyire értek hozzá (2)	Haladó szintű (5)	Többé-kevésbé értem a jelentését	Értem a jelentését, és másoknak is el tudnám magyarázni	Értem a jelentését, és másoknak is el tudnám magyarázni	Értem a jelentését, és másoknak is el tudnám magyarázni	Nem ismerem a jelentését, de szeretném megismerni	Nem ismerem a jelentését, de szeretném megismerni	Értem a jelentését, és másoknak is el tudnám magyarázni	Többé-kevésbé értem a jelentését	Többé-kevésbé értem a jelentését	Értem a jelentését, és másoknak is el tudnám magyarázni	Értem a jelentését, és másoknak is el tudnám magyarázni	Értem a jelentését, és másoknak is el tudnám magyarázni	Értem a jelentését, és másoknak is el tudnám magyarázni
254	https://online-kerdoiv.com/index/view/hash/f505d52a49dd686dada6511e6d93f5bb/r/CKyPPluSSgPZJGDmsSSlaSSA3bNxONaHgnSc8Ju2oOQOd0dlu4uM0nofxM8VtTczZQnaZMXIdOiOLA1zEg450LygBQ56AbQe6XEle5O2zJwkSSlaSSyVSSlaSSdKDuiFn334WgNeZYe6ik4KJBpPPluSSSSePPmocmDLKUYR8IoW0naSSlaSSrTuQkWOC945Ij6RI2XLsFZx4c%3D	Nő	Semmelweis Egyetem		Alapképzési (Bsc)	Ápoló (Bsc)		Levelezős	Második	Nem	Nem	Igen	Igen	Havonta vagy ritkábban	Igen	Igen	Igen		Google		Wikipedia	Pubmed/Medline			Egészségügyi szakemberek véleményének megismerése	Nem		Igen	az 1.-2. évfolyamon	Nem, az angol és magyar nyelvű forrásokat egyaránt elolvasom	Átlagosnál jobb (4)	Átlagos (3)	Valamennyire értek hozzá (2)	Gyenge (1)	Átlagosnál jobb (4)	Átlagosnál jobb (4)	Többé-kevésbé értem a jelentését	Többé-kevésbé értem a jelentését	Értem a jelentését, és másoknak is el tudnám magyarázni	Értem a jelentését, és másoknak is el tudnám magyarázni	Értem a jelentését, és másoknak is el tudnám magyarázni	Nem ismerem a jelentését, de szeretném megismerni	Többé-kevésbé értem a jelentését	Többé-kevésbé értem a jelentését	Többé-kevésbé értem a jelentését	Nem ismerem a jelentését, de szeretném megismerni	Értem a jelentését, és másoknak is el tudnám magyarázni	Értem a jelentését, és másoknak is el tudnám magyarázni	Értem a jelentését, és másoknak is el tudnám magyarázni
255	https://online-kerdoiv.com/index/view/hash/f505d52a49dd686dada6511e6d93f5bb/r/iI8ElFLkHyRbIo6laSCiekSP4PPluSS2vXSJuAK4FFHT5DkuSSSlaSSyobcZgCVq8NGwTb3v8E18NsgIEkXgxIPPluSS9Nhrit6I2bzOsRLFP8GvtNJZmpoDaKjA9bO9eoDSmOHr4gFVSSlaSSlmSSePPYZQmHyLDcmksPSDSSlaSSYI5f5pbMpTzysZANPPluSS0vGxHzFocg%3D	Nő	Semmelweis Egyetem		Alapképzési (Bsc)	Ápoló (Bsc)		Levelezős	Harmadik	Igen	Nem	Igen	Nem	Naponta	Igen	Igen	Nem		Google			Pubmed/Medline			Szakmai irányelvek	Igen	Igen	Igen	a 3.-4. évfolyamon	Igen, csak magyarul szeretek olvasni	Átlagos (3)	Átlagos (3)	Valamennyire értek hozzá (2)	Átlagos (3)	Valamennyire értek hozzá (2)	Átlagos (3)	Értem a jelentését, és másoknak is el tudnám magyarázni	Nem ismerem a jelentését, de szeretném megismerni	Értem a jelentését, és másoknak is el tudnám magyarázni	Értem a jelentését, és másoknak is el tudnám magyarázni	Értem a jelentését, és másoknak is el tudnám magyarázni	Nem ismerem a jelentését, de szeretném megismerni	Értem a jelentését, és másoknak is el tudnám magyarázni	Többé-kevésbé értem a jelentését	Többé-kevésbé értem a jelentését	Többé-kevésbé értem a jelentését	Értem a jelentését, és másoknak is el tudnám magyarázni	Értem a jelentését, és másoknak is el tudnám magyarázni	Többé-kevésbé értem a jelentését
256	https://online-kerdoiv.com/index/view/hash/f505d52a49dd686dada6511e6d93f5bb/r/8C9yKJJwb81AAYnY65xE0GFhFfHNcAJLqaHdjbzzwHLRQEAYMLKRPPluSSe5hSdjZH5qMPSBpFSSlaSSFvdFt2s4gz7PPluSSbiAJZO66gZV5GvJJ9kLuPzzqcI1BXliQmIlaW8hQqlmTLKSSePPCwAYSSlaSSaPbM6lNwnbO5BZlaGtyoMBOdLtn6vriD9EkKSSlaSSo%3D	Férfi	Semmelweis Egyetem		Mesterképzési (Msc)	Ápolás (Msc)		Nappali	Második	Igen	Nem	Igen	Nem	Havonta vagy ritkábban	Igen	Igen	Nem		Google	Google Scholar	Wikipedia	Pubmed/Medline	Medscape	Cochrane Library	Szakmai irányelvek	Igen	Igen	Igen	az 1.-2. évfolyamon	Igen, csak magyarul szeretek olvasni	Átlagos (3)	Átlagos (3)	Valamennyire értek hozzá (2)	Átlagos (3)	Átlagos (3)	Átlagosnál jobb (4)	Értem a jelentését, és másoknak is el tudnám magyarázni	Nem ismerem a jelentését, de szeretném megismerni	Értem a jelentését, és másoknak is el tudnám magyarázni	Értem a jelentését, és másoknak is el tudnám magyarázni	Többé-kevésbé értem a jelentését	Többé-kevésbé értem a jelentését	Értem a jelentését, és másoknak is el tudnám magyarázni	Többé-kevésbé értem a jelentését	Értem a jelentését, és másoknak is el tudnám magyarázni	Többé-kevésbé értem a jelentését	Értem a jelentését, és másoknak is el tudnám magyarázni	Értem a jelentését, és másoknak is el tudnám magyarázni	Értem a jelentését, és másoknak is el tudnám magyarázni
257	https://online-kerdoiv.com/index/view/hash/f505d52a49dd686dada6511e6d93f5bb/r/FHhwCUoWPnLjSKknpXPPluSSI1HtDwMyPPboWZkaFJig3ZVCSSlaSSd6hngE5jU0rQI8QsTHRqHBwaFfbDHMTgTKEmg67pxhzsL1hn3ZUvSSlaSS7UUL0ZRbQbOnorXqS6uIcol8fjlaAE0SSePPDlcZOxCrDHGS1JK0p9SBw2dp9n37PxnPPluSSAHInwBgrWnc%3D	Nő	Semmelweis Egyetem		Alapképzési (Bsc)	Szülésznő (Bsc)		Nappali	Második	Nem	Nem	Nem		Soha	Igen	Igen	Igen		Google		Wikipedia				Nyomtatott szakkönyvek	Nem		Igen	a 3.-4. évfolyamon	Igen, csak magyarul szeretek olvasni	Átlagosnál jobb (4)	Haladó szintű (5)	Gyenge (1)	Gyenge (1)	Átlagos (3)	Átlagos (3)	Többé-kevésbé értem a jelentését	Többé-kevésbé értem a jelentését	Többé-kevésbé értem a jelentését	Többé-kevésbé értem a jelentését	Nem ismerem a jelentését, de szeretném megismerni	Nem ismerem a jelentését, de szeretném megismerni	Értem a jelentését, és másoknak is el tudnám magyarázni	Többé-kevésbé értem a jelentését	Nem ismerem a jelentését, de szeretném megismerni	Nem ismerem a jelentését, de szeretném megismerni	Többé-kevésbé értem a jelentését	Többé-kevésbé értem a jelentését	Nem ismerem a jelentését, de szerintem nem is hasznos számomra
258	https://online-kerdoiv.com/index/view/hash/f505d52a49dd686dada6511e6d93f5bb/r/hMBWBy0acpqVQBMmYAdBYIQWra03wBgolGKWRjSSlaSS0PPluSSlWg1Iv7YJPPluSSPPluSSoqvPQnyKqYkh1cHfQpt4cOm1DkBPNdgyx3NkTd8B4jFh0u23eZP1v4HtX6oAyRxzzYew1RcERRcFSSePPQ1B4vHW9yBeF9N6MzlVzxcS5qPPluSS2rJfo0QY6UygBFwEA%3D	Nő	Semmelweis Egyetem		Alapképzési (Bsc)	Ápoló (Bsc)		Levelezős	Negyedik	Igen	Nem	Nem		Hetente	Igen	Igen	Igen					Pubmed/Medline			Elektronikus folyóiratok	Igen	Igen	Igen	a 3.-4. évfolyamon	Nem, sőt, olvastam már olyan forrást is, ami egyéb (nem angol vagy magyar) nyelven íródott	Haladó szintű (5)	Haladó szintű (5)	Átlagos (3)	Gyenge (1)	Átlagos (3)	Haladó szintű (5)	Többé-kevésbé értem a jelentését	Nem ismerem a jelentését, de szeretném megismerni	Értem a jelentését, és másoknak is el tudnám magyarázni	Értem a jelentését, és másoknak is el tudnám magyarázni	Értem a jelentését, és másoknak is el tudnám magyarázni	Értem a jelentését, és másoknak is el tudnám magyarázni	Értem a jelentését, és másoknak is el tudnám magyarázni	Értem a jelentését, és másoknak is el tudnám magyarázni	Értem a jelentését, és másoknak is el tudnám magyarázni	Értem a jelentését, és másoknak is el tudnám magyarázni	Értem a jelentését, és másoknak is el tudnám magyarázni	Értem a jelentését, és másoknak is el tudnám magyarázni	Értem a jelentését, és másoknak is el tudnám magyarázni
259	https://online-kerdoiv.com/index/view/hash/f505d52a49dd686dada6511e6d93f5bb/r/PPluSSFEWWQnSSlaSSy6nBPPluSSqNOLFHhoLkQqfy9xSS6MxrPPluSSlBrjwKpsMJxhZhLhUAj3Eu1W3YLSSlaSS96iyDkA6leI83SePqG6vmVQpZU7c0PJdhPPluSS9W314yjZaU72jic6wpHXl88Zs5ZlPQSSePP8EdsgSSlaSS6NtG1EzGPPluSSnEi25TiZhWYA3PPluSSYb6FBpsPPluSSGoJTkY%3D	Nő	Semmelweis Egyetem		Alapképzési (Bsc)	Mentőtiszt (Bsc)		Levelezős	Negyedik	Nem	Nem	Igen	Nem	Hetente	Igen	Igen	Igen		Google			Pubmed/Medline	Medscape		Nyomtatott folyóiratok	Nem		Igen	a 3.-4. évfolyamon	Igen, csak magyarul szeretek olvasni	Átlagos (3)	Átlagosnál jobb (4)	Átlagos (3)	Átlagosnál jobb (4)	Átlagos (3)	Haladó szintű (5)	Értem a jelentését, és másoknak is el tudnám magyarázni	Nem ismerem a jelentését, de szeretném megismerni	Értem a jelentését, és másoknak is el tudnám magyarázni	Értem a jelentését, és másoknak is el tudnám magyarázni	Nem ismerem a jelentését, de szeretném megismerni	Többé-kevésbé értem a jelentését	Értem a jelentését, és másoknak is el tudnám magyarázni	Értem a jelentését, és másoknak is el tudnám magyarázni	Nem ismerem a jelentését, de szeretném megismerni	Nincs véleményem ezzel kapcsolatosan	Értem a jelentését, és másoknak is el tudnám magyarázni	Értem a jelentését, és másoknak is el tudnám magyarázni	Többé-kevésbé értem a jelentését
260	https://online-kerdoiv.com/index/view/hash/f505d52a49dd686dada6511e6d93f5bb/r/GsuCT4IUgsQxGLXTmnO0jOYaTXTNCEYjxL2vSRvXuWUKUdwEPu2OqhmOTH0kvgPPluSSyNMt4zbWLjHHFIRC2ZT3XuFN8ZwrjbyZd9JIEPPluSSaFPPluSSeXoSSlaSSLynVssGbMRoND5xFDDlMSSePP4ZeglnVkahILSSlaSSBiDstqgNFu1x61yghk5TSSlaSSt1CHPPluSSQnqA%3D	Nő	Semmelweis Egyetem		Alapképzési (Bsc)	Dietetikus (Bsc)		Nappali	Első	Nem	Nem	Igen	Nem	Havonta vagy ritkábban	Igen	Igen	Igen		Google	Google Scholar		Pubmed/Medline			Elektronikus szakkönyvek	Nem		Igen	a 3.-4. évfolyamon	Nem, az angol és magyar nyelvű forrásokat egyaránt elolvasom	Átlagosnál jobb (4)	Haladó szintű (5)	Átlagos (3)	Valamennyire értek hozzá (2)	Átlagosnál jobb (4)	Átlagosnál jobb (4)	Értem a jelentését, és másoknak is el tudnám magyarázni	Többé-kevésbé értem a jelentését	Értem a jelentését, és másoknak is el tudnám magyarázni	Értem a jelentését, és másoknak is el tudnám magyarázni	Nem ismerem a jelentését, de szeretném megismerni	Nem ismerem a jelentését, de szeretném megismerni	Többé-kevésbé értem a jelentését	Nem ismerem a jelentését, de szeretném megismerni	Többé-kevésbé értem a jelentését	Nem ismerem a jelentését, de szeretném megismerni	Értem a jelentését, és másoknak is el tudnám magyarázni	Értem a jelentését, és másoknak is el tudnám magyarázni	Többé-kevésbé értem a jelentését
261	https://online-kerdoiv.com/index/view/hash/f505d52a49dd686dada6511e6d93f5bb/r/cPPluSS0KcInRy1tKj6CSSlaSSemzCNaOGAPPluSSIomts2It1kAg40rPPluSS2orqpC2Xkk7kK3hrw1Ul7vEowG1xF71xLtQ3bSSlaSSIEmMb5esa5ULjxaA4vFNfi45J0uTt5HmhNhejYIg5EV5p0pUSSePPjclhPPluSSk2XvHxnyuFnIPPluSSKSSlaSSMoSqPPluSSeMV9ltpSTbT4Iz4DGY%3D	Férfi	Semmelweis Egyetem		Alapképzési (Bsc)	Dietetikus (Bsc)		Nappali	Első	Nem	Nem	Nem		Soha	Igen	Igen	Nem		Google		Wikipedia	Pubmed/Medline			Nyomtatott szakkönyvek	Nem		Igen	a 3.-4. évfolyamon	Igen, csak magyarul szeretek olvasni	Átlagos (3)	Átlagos (3)	Gyenge (1)	Gyenge (1)	Átlagos (3)	Valamennyire értek hozzá (2)	Nem ismerem a jelentését, de szeretném megismerni	Nem ismerem a jelentését, de szeretném megismerni	Nem ismerem a jelentését, de szeretném megismerni	Nem ismerem a jelentését, de szeretném megismerni	Nem ismerem a jelentését, de szeretném megismerni	Nem ismerem a jelentését, de szeretném megismerni	Nem ismerem a jelentését, de szeretném megismerni	Többé-kevésbé értem a jelentését	Nem ismerem a jelentését, de szeretném megismerni	Nem ismerem a jelentését, de szeretném megismerni	Nem ismerem a jelentését, de szeretném megismerni	Nem ismerem a jelentését, de szeretném megismerni	Nem ismerem a jelentését, de szeretném megismerni
262	https://online-kerdoiv.com/index/view/hash/f505d52a49dd686dada6511e6d93f5bb/r/hcTIAXZsq1fIlWal1JmzzmmI5YWCBsdTniCuvALViI08L6SSlaSSSSSlaSSngTvRCIzPTTeA59y0Y7iRo34wd0F2p3TDRd0bY1Sn2O9bE3OY7MnJyZfITWR7hMWSSlaSSrVdAHBlJ2Af15ISSePP4bI1kdyzAL7TWSSlaSSPPluSS4sG2szPPPluSS6FVm7BLubtQbOUD2ilz8%3D	Nő	Semmelweis Egyetem		Alapképzési (Bsc)	Népegészségügyi ellenőr (Bsc)		Nappali	Harmadik	Nem	Nem	Nem		Havonta vagy ritkábban	Igen	Igen	Nem		Google	Google Scholar		Pubmed/Medline			Nyomtatott szakkönyvek	Nem		Igen	az 1.-2. évfolyamon	Nem, az angol és magyar nyelvű forrásokat egyaránt elolvasom	Átlagosnál jobb (4)	Átlagos (3)	Átlagosnál jobb (4)	Átlagos (3)	Átlagosnál jobb (4)	Gyenge (1)	Értem a jelentését, és másoknak is el tudnám magyarázni	Többé-kevésbé értem a jelentését	Értem a jelentését, és másoknak is el tudnám magyarázni	Értem a jelentését, és másoknak is el tudnám magyarázni	Értem a jelentését, és másoknak is el tudnám magyarázni	Értem a jelentését, és másoknak is el tudnám magyarázni	Többé-kevésbé értem a jelentését	Nem ismerem a jelentését, de szeretném megismerni	Nem ismerem a jelentését, de szeretném megismerni	Nem ismerem a jelentését, de szeretném megismerni	Értem a jelentését, és másoknak is el tudnám magyarázni	Értem a jelentését, és másoknak is el tudnám magyarázni	Értem a jelentését, és másoknak is el tudnám magyarázni
263	https://online-kerdoiv.com/index/view/hash/f505d52a49dd686dada6511e6d93f5bb/r/3GZRUakX5Fho6RfIUCpVYHYuINfk7DbKRZkgpzT3XWx5dwQMmC2NIYSIPPluSSTdErmRtoqdbJ6IU0KI8PPluSSOYz6DpnjZsVSSlaSSePAM5btAPPluSSrzkSSlaSSi7pLAEo81eeMNLJBosFRWhqsqdSSePP8VHPPluSStMJ7xIELCFNuqt0r47RIdtvZ7pYNc7v0LUvFSPs%3D	Nő	Semmelweis Egyetem		Alapképzési (Bsc)	Dietetikus (Bsc)		Nappali	Második	Nem	Nem	Nem		Havonta vagy ritkábban	Igen	Igen	Igen		Google			Pubmed/Medline			Nyomtatott szakkönyvek	Nem		Igen	a 3.-4. évfolyamon	Nem, az angol és magyar nyelvű forrásokat egyaránt elolvasom	Átlagos (3)	Átlagos (3)	Valamennyire értek hozzá (2)	Valamennyire értek hozzá (2)	Átlagos (3)	Átlagos (3)	Értem a jelentését, és másoknak is el tudnám magyarázni	Nem ismerem a jelentését, de szeretném megismerni	Értem a jelentését, és másoknak is el tudnám magyarázni	Többé-kevésbé értem a jelentését	Nem ismerem a jelentését, de szeretném megismerni	Nem ismerem a jelentését, de szeretném megismerni	Többé-kevésbé értem a jelentését	Többé-kevésbé értem a jelentését	Nem ismerem a jelentését, de szeretném megismerni	Nem ismerem a jelentését, de szeretném megismerni	Többé-kevésbé értem a jelentését	Értem a jelentését, és másoknak is el tudnám magyarázni	Értem a jelentését, és másoknak is el tudnám magyarázni
264	https://online-kerdoiv.com/index/view/hash/f505d52a49dd686dada6511e6d93f5bb/r/ObgCXJccSOsE3gdOR8nrTm3E7eUjKuPviVbzXTVKDlzpMj3eWOVSoLzHd1oqLl9bWBiuPPluSSAmDEhfyIQR1vQGFi5VwdwSSlaSS8PPluSSEyD1xkU8sMqVJ3Fi5juPuuGnljDousabs2uSSePPHgKwDHdwrLFCSYpOzALceijNfUnekY6EjFP9B3hADdE%3D	Nő	Semmelweis Egyetem		Alapképzési (Bsc)	Szülésznő (Bsc)		Nappali	Harmadik	Nem	Nem	Nem		Havonta vagy ritkábban	Igen	Igen	Nem		Google			Pubmed/Medline			Elektronikus folyóiratok	Nem		Igen	a 3.-4. évfolyamon	Nem, az angol és magyar nyelvű forrásokat egyaránt elolvasom	Valamennyire értek hozzá (2)	Gyenge (1)	Gyenge (1)	Gyenge (1)	Gyenge (1)	Valamennyire értek hozzá (2)	Többé-kevésbé értem a jelentését	Nem ismerem a jelentését, de szeretném megismerni	Értem a jelentését, és másoknak is el tudnám magyarázni	Értem a jelentését, és másoknak is el tudnám magyarázni	Nem ismerem a jelentését, de szeretném megismerni	Nem ismerem a jelentését, de szeretném megismerni	Többé-kevésbé értem a jelentését	Értem a jelentését, és másoknak is el tudnám magyarázni	Nem ismerem a jelentését, de szeretném megismerni	Nem ismerem a jelentését, de szeretném megismerni	Többé-kevésbé értem a jelentését	Többé-kevésbé értem a jelentését	Értem a jelentését, és másoknak is el tudnám magyarázni
265	https://online-kerdoiv.com/index/view/hash/f505d52a49dd686dada6511e6d93f5bb/r/6VsyuvLwqkyNt2UvPPluSSIFGtQwx4rV7SSlaSSofkTsDm1PbP3czqNFwpMQv1EO7h09LB8FZaSskx7RbbkBwILPPPluSSBERPPluSSe9EGlkPOI26UA7YSSlaSSdRkyDFOZZkdMGgqspJ9qMPpYxcbxUSSePPSQqxCfN9m3V29h3RyjgBrtunNKTYM9gfUqjtrYTr25Y%3D	Nő	Semmelweis Egyetem		Alapképzési (Bsc)	Szülésznő (Bsc)		Levelezős	Első	Nem	Nem	Nem		Soha	Igen	Igen	Nem		Google		Wikipedia				Nyomtatott szakkönyvek	Nem		Igen	az 1.-2. évfolyamon	Nem, az angol és magyar nyelvű forrásokat egyaránt elolvasom	Valamennyire értek hozzá (2)	Valamennyire értek hozzá (2)	Gyenge (1)	Gyenge (1)	Átlagos (3)	Átlagosnál jobb (4)	Többé-kevésbé értem a jelentését	Nem ismerem a jelentését, de szeretném megismerni	Nem ismerem a jelentését, de szeretném megismerni	Többé-kevésbé értem a jelentését	Nem ismerem a jelentését, de szeretném megismerni	Nem ismerem a jelentését, de szeretném megismerni	Többé-kevésbé értem a jelentését	Nem ismerem a jelentését, de szeretném megismerni	Nem ismerem a jelentését, de szeretném megismerni	Nem ismerem a jelentését, de szeretném megismerni	Többé-kevésbé értem a jelentését	Többé-kevésbé értem a jelentését	Nem ismerem a jelentését, de szeretném megismerni
266	https://online-kerdoiv.com/index/view/hash/f505d52a49dd686dada6511e6d93f5bb/r/7fLYasBVouUCOSwnuvhFJRr4EhU9UA1lNx37cFvYaqFCUFusiBKJ1z6j6YqTOw2wJSqQPPluSSD3x8u2I1122nwJCPNjUID8skUgbwDFRhH0zM9oLECGyp6xnE2Fb86v16bVKSSePP6pCZCjA9tNdm5AzCqrSiL2F06J3tyCZ35duZrCpXuEU%3D	Nő	Semmelweis Egyetem		Alapképzési (Bsc)	Dietetikus (Bsc)		Levelezős	Első	Nem	Nem	Nem		Havonta vagy ritkábban	Nem	Igen	Nem		Google		Wikipedia				Nyomtatott szakkönyvek	Nem		Igen	a 3.-4. évfolyamon	Nem, az angol és magyar nyelvű forrásokat egyaránt elolvasom	Átlagos (3)	Átlagos (3)	Gyenge (1)	Gyenge (1)	Valamennyire értek hozzá (2)	Átlagos (3)	Nem ismerem a jelentését, de szeretném megismerni	Nem ismerem a jelentését, de szeretném megismerni	Értem a jelentését, és másoknak is el tudnám magyarázni	Értem a jelentését, és másoknak is el tudnám magyarázni	Nem ismerem a jelentését, de szeretném megismerni	Többé-kevésbé értem a jelentését	Értem a jelentését, és másoknak is el tudnám magyarázni	Értem a jelentését, és másoknak is el tudnám magyarázni	Többé-kevésbé értem a jelentését	Többé-kevésbé értem a jelentését	Nem ismerem a jelentését, de szeretném megismerni	Értem a jelentését, és másoknak is el tudnám magyarázni	Többé-kevésbé értem a jelentését
267	https://online-kerdoiv.com/index/view/hash/f505d52a49dd686dada6511e6d93f5bb/r/dohD2CgUjmZSSlaSStk3bJSSlaSSmRkMOuSSlaSSw337JThTkDCFPlHf8TRabD9LkAHP8HIYkqc6PPluSSPPluSSvUibDULI83PLJ4aHRiEXBmmwj6qESSlaSSpt0v7ux00m4OlVcGjyrMPPluSS6yUfrmV0refmdADSSePPzeOzw1PiJ5b8r4ZJPPluSShbxkwrHSSlaSSRkdAhjsbebh5LWyaN4%3D	Nő	Semmelweis Egyetem		Alapképzési (Bsc)	Védőnő (Bsc)		Nappali	Harmadik	Nem	Nem	Igen	Nem	Havonta vagy ritkábban	Igen	Igen	Nem		Google	Google Scholar		Pubmed/Medline			Nyomtatott folyóiratok	Nem		Igen	a 3.-4. évfolyamon	Igen, csak magyarul szeretek olvasni	Átlagosnál jobb (4)	Haladó szintű (5)	Átlagos (3)	Valamennyire értek hozzá (2)	Átlagos (3)	Átlagos (3)	Értem a jelentését, és másoknak is el tudnám magyarázni	Többé-kevésbé értem a jelentését	Értem a jelentését, és másoknak is el tudnám magyarázni	Értem a jelentését, és másoknak is el tudnám magyarázni	Nem ismerem a jelentését, de szeretném megismerni	Nem ismerem a jelentését, de szeretném megismerni	Többé-kevésbé értem a jelentését	Nem ismerem a jelentését, de szeretném megismerni	Nem ismerem a jelentését, de szeretném megismerni	Nem ismerem a jelentését, de szeretném megismerni	Nem ismerem a jelentését, de szeretném megismerni	Értem a jelentését, és másoknak is el tudnám magyarázni	Nem ismerem a jelentését, de szeretném megismerni
268	https://online-kerdoiv.com/index/view/hash/f505d52a49dd686dada6511e6d93f5bb/r/ONBJ3Se6yycTkwQC3hPPluSSiudIJ8agPzSiaMIXvcdIdSiTd95RqoZKes3BaPrRb1hM7p9T3Ih5zaXFKQN5oaePATGbvD8Ot6BnJt4iX5uV0DA1nSSlaSSNjSSlaSSjuvKsanSSlaSSBn10z7eySSePPiSaQpEAkFim9TAxqpzc9etmTDVUmXUw03zPKAjrL5ug%3D	Nő	Semmelweis Egyetem		Alapképzési (Bsc)	Népegészségügyi ellenőr (Bsc)		Nappali	Első	Igen	Nem	Igen	Nem	Hetente	Igen	Igen	Nem				Wikipedia		Medscape	Cochrane Library	Oktatási jegyzetek	Nem		Igen	a 3.-4. évfolyamon	Igen, csak magyarul szeretek olvasni	Átlagos (3)	Átlagosnál jobb (4)	Átlagos (3)	Valamennyire értek hozzá (2)	Átlagos (3)	Átlagosnál jobb (4)	Nem ismerem a jelentését, de szeretném megismerni	Nem ismerem a jelentését, de szeretném megismerni	Értem a jelentését, és másoknak is el tudnám magyarázni	Többé-kevésbé értem a jelentését	Nem ismerem a jelentését, de szeretném megismerni	Nem ismerem a jelentését, de szeretném megismerni	Nem ismerem a jelentését, de szeretném megismerni	Többé-kevésbé értem a jelentését	Nem ismerem a jelentését, de szeretném megismerni	Nem ismerem a jelentését, de szeretném megismerni	Többé-kevésbé értem a jelentését	Többé-kevésbé értem a jelentését	Nem ismerem a jelentését, de szerintem nem is hasznos számomra
269	https://online-kerdoiv.com/index/view/hash/f505d52a49dd686dada6511e6d93f5bb/r/UdPD9IHMQhhbZWAQYAUBg7p4sEOjn0rkJwn7ZqLfgA5tynah3Rmm4j2suHUcr7sQjZxGpVHbQ7v9c1mitM3CD2gumdUKp6zghGQ5wJ6YICumtPPluSS1lOQqn3sbS0Lr0SSlaSSzBzSSePPSSlaSSuQeemO1PPluSSEpws8xCdWylqm7mE6zER1q8pwpuoeG0SFs%3D	Nő	Semmelweis Egyetem		Mesterképzési (Msc)	Táplálkozástudományi (Msc)		Levelezős	Második	Igen	Nem	Igen	Nem	Havonta vagy ritkábban	Igen	Igen	Nem		Google		Wikipedia	Pubmed/Medline			Elektronikus szakkönyvek	Nem		Igen	az 1.-2. évfolyamon	Igen, csak magyarul szeretek olvasni	Átlagos (3)	Átlagosnál jobb (4)	Átlagos (3)	Átlagos (3)	Átlagos (3)	Átlagos (3)	Többé-kevésbé értem a jelentését	Többé-kevésbé értem a jelentését	Értem a jelentését, és másoknak is el tudnám magyarázni	Értem a jelentését, és másoknak is el tudnám magyarázni	Értem a jelentését, és másoknak is el tudnám magyarázni	Többé-kevésbé értem a jelentését	Többé-kevésbé értem a jelentését	Többé-kevésbé értem a jelentését	Értem a jelentését, és másoknak is el tudnám magyarázni	Többé-kevésbé értem a jelentését	Értem a jelentését, és másoknak is el tudnám magyarázni	Értem a jelentését, és másoknak is el tudnám magyarázni	Többé-kevésbé értem a jelentését
270	https://online-kerdoiv.com/index/view/hash/f505d52a49dd686dada6511e6d93f5bb/r/60WF1H2lxxtCWRsKdJDMqwEQGfrla2iugQqUdIl9NYQc6dJ35UKFVldf9PgORKfEHQiSk9SSlaSSaqWt3DSGovSwcwrnvunJ6xsKK5eP0goyqWku4ZCvSaSDW956IweEq5WdHSSePP2nBsZXC4MMnwPPluSSPGSSlaSSPPluSSWfDEBIBFJbX0pQM3qWxouFc6Fs%3D	Nő	Semmelweis Egyetem		Alapképzési (Bsc)	Védőnő (Bsc)		Nappali	Első	Nem	Nem	Igen	Nem	Soha	Igen	Igen	Igen		Google		Wikipedia				Nyomtatott szakkönyvek	Nem		Igen	a 3.-4. évfolyamon	Igen, csak magyarul szeretek olvasni	Gyenge (1)	Átlagos (3)	Gyenge (1)	Gyenge (1)	Valamennyire értek hozzá (2)	Valamennyire értek hozzá (2)	Többé-kevésbé értem a jelentését	Többé-kevésbé értem a jelentését	Nem ismerem a jelentését, de szeretném megismerni	Nem ismerem a jelentését, de szeretném megismerni	Nem ismerem a jelentését, de szeretném megismerni	Nem ismerem a jelentését, de szeretném megismerni	Nem ismerem a jelentését, de szeretném megismerni	Nem ismerem a jelentését, de szeretném megismerni	Nem ismerem a jelentését, de szeretném megismerni	Nem ismerem a jelentését, de szeretném megismerni	Többé-kevésbé értem a jelentését	Többé-kevésbé értem a jelentését	Nem ismerem a jelentését, de szeretném megismerni
271	https://online-kerdoiv.com/index/view/hash/f505d52a49dd686dada6511e6d93f5bb/r/HZLHSit7rPLYECYD7sfHrPuOn84SSlaSSX3ZBP8ySh7tZSSlaSSDuzjv4nAwr9o2DUjdthIA9khzXAjZTPPluSSIqPPluSSioGadgVISSlaSSEQKADTqjzYuQkJ3oM8aBbAiDtPPluSSXtUNF7gX47P8zyxb5ySSePPsAQ3Pb4UhEIZe2xKIXvhtNvzKuJALkO84PlmbGmfQas%3D	Nő	Semmelweis Egyetem		Alapképzési (Bsc)	Gyógytornász (Bsc)		Nappali	Harmadik	Nem	Nem	Nem		Hetente	Igen	Igen	Nem		Google			Pubmed/Medline			Elektronikus folyóiratok	Nem		Igen	a 3.-4. évfolyamon	Nem, sőt, olvastam már olyan forrást is, ami egyéb (nem angol vagy magyar) nyelven íródott	Átlagos (3)	Átlagos (3)	Valamennyire értek hozzá (2)	Valamennyire értek hozzá (2)	Átlagos (3)	Átlagos (3)	Értem a jelentését, és másoknak is el tudnám magyarázni	Többé-kevésbé értem a jelentését	Értem a jelentését, és másoknak is el tudnám magyarázni	Értem a jelentését, és másoknak is el tudnám magyarázni	Nem ismerem a jelentését, de szeretném megismerni	Nem ismerem a jelentését, de szeretném megismerni	Értem a jelentését, és másoknak is el tudnám magyarázni	Többé-kevésbé értem a jelentését	Értem a jelentését, és másoknak is el tudnám magyarázni	Többé-kevésbé értem a jelentését	Értem a jelentését, és másoknak is el tudnám magyarázni	Többé-kevésbé értem a jelentését	Értem a jelentését, és másoknak is el tudnám magyarázni
272	https://online-kerdoiv.com/index/view/hash/f505d52a49dd686dada6511e6d93f5bb/r/qhkFN52m6pp3ATheV4XwlKFENQVODGQcokPqPmvEjwTPPluSS4Aio2TXQw7kADSSlaSS6KRop6TeNa0ziK7LQUuV8X9urd5viB4jGn5CAw3ZrcLT3mq6e9SSlaSSlHPPluSS1hx78HN2SSlaSSW2bKnoASSePPDzOSSlaSSoLfflgRX3FCdqxgM8Lm1zuOsJv00txTkrshJSSlaSS7w%3D	Nő	Semmelweis Egyetem		Alapképzési (Bsc)	Dietetikus (Bsc)		Nappali	Második	Nem	Nem	Nem		Havonta vagy ritkábban	Igen	Igen	Igen		Google		Wikipedia				Elektronikus szakkönyvek	Nem		Igen	a 3.-4. évfolyamon	Nem, az angol és magyar nyelvű forrásokat egyaránt elolvasom	Átlagos (3)	Átlagosnál jobb (4)	Valamennyire értek hozzá (2)	Valamennyire értek hozzá (2)	Átlagos (3)	Átlagos (3)	Értem a jelentését, és másoknak is el tudnám magyarázni	Többé-kevésbé értem a jelentését	Értem a jelentését, és másoknak is el tudnám magyarázni	Értem a jelentését, és másoknak is el tudnám magyarázni	Nem ismerem a jelentését, de szeretném megismerni	Nem ismerem a jelentését, de szeretném megismerni	Többé-kevésbé értem a jelentését	Értem a jelentését, és másoknak is el tudnám magyarázni	Nem ismerem a jelentését, de szeretném megismerni	Nem ismerem a jelentését, de szeretném megismerni	Többé-kevésbé értem a jelentését	Értem a jelentését, és másoknak is el tudnám magyarázni	Értem a jelentését, és másoknak is el tudnám magyarázni
273	https://online-kerdoiv.com/index/view/hash/f505d52a49dd686dada6511e6d93f5bb/r/6ZJsomjSSlaSSIJDRpgMlPPluSSdIDKD5z06HpWqB7JekSVkgbyPSSlaSS2Lo2ANgSg1mmrkr4MkUb6OAYUVL0mbv3MYZi6js6XCFXTpZQgtvmgVAOVUkybTHZ9BZKWpx4UsJSSlaSSjQgQrjSSlaSS6nSSePPm5DTf3vbHfatb4W34BmQqwaSSlaSSUUj74gSSlaSSbiae4FUHkRsM%3D	Nő	Semmelweis Egyetem		Alapképzési (Bsc)	Gyógytornász (Bsc)		Nappali	Negyedik	Nem	Igen	Igen	Igen	Soha	Igen	Igen	Igen		Google		Wikipedia	Pubmed/Medline			Elektronikus folyóiratok	Nem		Igen	az 1.-2. évfolyamon	Nem, az angol és magyar nyelvű forrásokat egyaránt elolvasom	Valamennyire értek hozzá (2)	Átlagos (3)	Gyenge (1)	Valamennyire értek hozzá (2)	Gyenge (1)	Gyenge (1)	Értem a jelentését, és másoknak is el tudnám magyarázni	Értem a jelentését, és másoknak is el tudnám magyarázni	Értem a jelentését, és másoknak is el tudnám magyarázni	Értem a jelentését, és másoknak is el tudnám magyarázni	Nincs véleményem ezzel kapcsolatos	Nincs véleményem ezzel kapcsolatos	Nem ismerem a jelentését, de szeretném megismerni	Nem ismerem a jelentését, de szeretném megismerni	Nem ismerem a jelentését, de szeretném megismerni	Nem ismerem a jelentését, de szeretném megismerni	Többé-kevésbé értem a jelentését	Többé-kevésbé értem a jelentését	Többé-kevésbé értem a jelentését
274	https://online-kerdoiv.com/index/view/hash/f505d52a49dd686dada6511e6d93f5bb/r/QPPPluSSeqNcF6lEapx0YHRUTr9RWNX39IkHLuILb81j7xgAASojwSSSlaSS5S376id80t9ZKlk7ti0Rhc2Ca20g2vXjv0vSSlaSSLBRLkI8N17SOJeffNXqaCzitINgD3wzr31lZQwno0WSSePPP5GPPluSSCHvbjsWEtwF5cxY5CqmlSSlaSSjmKpI9fc8tvlW0s2Uc%3D	Nő	Semmelweis Egyetem		Alapképzési (Bsc)	Dietetikus (Bsc)		Nappali	Második	Nem	Nem	Nem		Havonta vagy ritkábban	Igen	Igen	Igen		Google		Wikipedia	Pubmed/Medline			Nyomtatott szakkönyvek	Igen	Igen	Igen	a 3.-4. évfolyamon	Nem, az angol és magyar nyelvű forrásokat egyaránt elolvasom	Valamennyire értek hozzá (2)	Átlagosnál jobb (4)	Átlagosnál jobb (4)	Átlagos (3)	Átlagosnál jobb (4)	Átlagos (3)	Értem a jelentését, és másoknak is el tudnám magyarázni	Nem ismerem a jelentését, de szeretném megismerni	Többé-kevésbé értem a jelentését	Értem a jelentését, és másoknak is el tudnám magyarázni	Többé-kevésbé értem a jelentését	Nem ismerem a jelentését, de szeretném megismerni	Értem a jelentését, és másoknak is el tudnám magyarázni	Többé-kevésbé értem a jelentését	Nem ismerem a jelentését, de szeretném megismerni	Nem ismerem a jelentését, de szeretném megismerni	Értem a jelentését, és másoknak is el tudnám magyarázni	Többé-kevésbé értem a jelentését	Többé-kevésbé értem a jelentését
275	https://online-kerdoiv.com/index/view/hash/f505d52a49dd686dada6511e6d93f5bb/r/Hxx81tpQpaSt70DRWFJs4zUscJd5ZqnaVBsTYMPPluSSInIJUC1PbPtZ5OX2TwUxeGnzdjx9eQ5HkoV43jEkPEZXCSSlaSS6F1HRFkN2eHy3KWGazQ7pN154U82k7Z359PQaFSFLHcSSePPlIdpCvxJCbSZcB5GSSlaSSrfCMwPWVOkncSSlaSSIOWxJ9nh5szSSlaSSk%3D	Nő	Semmelweis Egyetem		Mesterképzési (Msc)	Ápolás (Msc)		Nappali	Első	Igen	Nem	Nem		Havonta vagy ritkábban	Igen	Igen	Nem		Google			Pubmed/Medline			Szakmai irányelvek	Nem		Igen	a 3.-4. évfolyamon	Igen, csak magyarul szeretek olvasni	Átlagosnál jobb (4)	Átlagosnál jobb (4)	Átlagos (3)	Átlagos (3)	Átlagosnál jobb (4)	Átlagosnál jobb (4)	Értem a jelentését, és másoknak is el tudnám magyarázni	Értem a jelentését, és másoknak is el tudnám magyarázni	Értem a jelentését, és másoknak is el tudnám magyarázni	Értem a jelentését, és másoknak is el tudnám magyarázni	Többé-kevésbé értem a jelentését	Többé-kevésbé értem a jelentését	Többé-kevésbé értem a jelentését	Nem ismerem a jelentését, de szeretném megismerni	Értem a jelentését, és másoknak is el tudnám magyarázni	Nem ismerem a jelentését, de szeretném megismerni	Értem a jelentését, és másoknak is el tudnám magyarázni	Értem a jelentését, és másoknak is el tudnám magyarázni	Értem a jelentését, és másoknak is el tudnám magyarázni
276	https://online-kerdoiv.com/index/view/hash/f505d52a49dd686dada6511e6d93f5bb/r/GeSSlaSSaoETgLfqEqW6eD7tJnXqamEDBUlayI5icNcNkn2JuqJgS1q9PPluSS3OaZEyQL3baiWduRJdVAVRZto2XMASSlaSS5Knyz2g1BkfogYmIpskV1cOacnjIeqCLgsMVeABtVJ6zrQSSePPQNZ3bcy8AsPPluSSjhK0m7Ds0d54QAelkOA2NuHc8X7nt2ns%3D	Nő	Semmelweis Egyetem		Alapképzési (Bsc)	Gyógytornász (Bsc)		Nappali	Negyedik	Nem	Nem	Nem		Havonta vagy ritkábban	Igen	Igen	Nem		Google			Pubmed/Medline			Nyomtatott szakkönyvek	Nem		Igen	az 1.-2. évfolyamon	Nem, az angol és magyar nyelvű forrásokat egyaránt elolvasom	Átlagos (3)	Átlagosnál jobb (4)	Valamennyire értek hozzá (2)	Valamennyire értek hozzá (2)	Átlagos (3)	Átlagos (3)	Értem a jelentését, és másoknak is el tudnám magyarázni	Nem ismerem a jelentését, de szeretném megismerni	Többé-kevésbé értem a jelentését	Többé-kevésbé értem a jelentését	Nem ismerem a jelentését, de szeretném megismerni	Nem ismerem a jelentését, de szeretném megismerni	Nem ismerem a jelentését, de szeretném megismerni	Nem ismerem a jelentését, de szerintem nem is hasznos számomra	Nem ismerem a jelentését, de szeretném megismerni	Nem ismerem a jelentését, de szeretném megismerni	Nem ismerem a jelentését, de szeretném megismerni	Értem a jelentését, és másoknak is el tudnám magyarázni	Többé-kevésbé értem a jelentését
277	https://online-kerdoiv.com/index/view/hash/f505d52a49dd686dada6511e6d93f5bb/r/Jbk12Yc76neaQcuMakV30Y5tVXPKwqW6IeRdsRq7Hi3yVJJPPluSSXgEwpXPPluSSwsXIUM2JwkbSSlaSSzRQglZQVJaWdfPPluSSqPPluSSniGiTU5kRnTR6zL7GBN7itB116ZBaaqXB9eFjIGFR29PPluSSZSSePPDwEr4LanXMlArbtYEAtCTtxt7WvTApbbZc0MnuVQDk4%3D	Nő	Semmelweis Egyetem		Alapképzési (Bsc)	Gyógytornász (Bsc)		Nappali	Második	Nem	Igen	Nem		Havonta vagy ritkábban	Igen	Igen	Nem			Google Scholar		Pubmed/Medline			Elektronikus folyóiratok	Igen	Nem	Igen	az 1.-2. évfolyamon	Nem, az angol és magyar nyelvű forrásokat egyaránt elolvasom	Átlagos (3)	Átlagos (3)	Átlagos (3)	Gyenge (1)	Átlagosnál jobb (4)	Átlagosnál jobb (4)	Értem a jelentését, és másoknak is el tudnám magyarázni	Többé-kevésbé értem a jelentését	Értem a jelentését, és másoknak is el tudnám magyarázni	Értem a jelentését, és másoknak is el tudnám magyarázni	Értem a jelentését, és másoknak is el tudnám magyarázni	Értem a jelentését, és másoknak is el tudnám magyarázni	Nem ismerem a jelentését, de szeretném megismerni	Értem a jelentését, és másoknak is el tudnám magyarázni	Értem a jelentését, és másoknak is el tudnám magyarázni	Nem ismerem a jelentését, de szeretném megismerni	Értem a jelentését, és másoknak is el tudnám magyarázni	Többé-kevésbé értem a jelentését	Többé-kevésbé értem a jelentését
278	https://online-kerdoiv.com/index/view/hash/f505d52a49dd686dada6511e6d93f5bb/r/IVP3OjFEnRk8moZvXsBoJRydJTGWqpVwuRj5vmaDKxX24xv4w15klf8sqxNjkmfKWpfnsh3B10u4ACPPluSSSSlaSS7mCfIiGdIX3PNKGydefcONRly89LE8KHuJfAafVq2qsNcJaxSSePPRl9VvwSSlaSSmua7BU9mbiZHsUjXgtdj2NH0gozTKfdz6ErE%3D	Nő	Semmelweis Egyetem		Alapképzési (Bsc)	Ápoló (Bsc)		Nappali	Negyedik	Nem	Igen	Nem		Havonta vagy ritkábban	Igen	Igen	Igen		Google		Wikipedia	Pubmed/Medline	Medscape		Elektronikus folyóiratok	Nem		Igen	a 3.-4. évfolyamon	Nem, az angol és magyar nyelvű forrásokat egyaránt elolvasom	Átlagosnál jobb (4)	Átlagos (3)	Átlagos (3)	Valamennyire értek hozzá (2)	Átlagos (3)	Átlagosnál jobb (4)	Többé-kevésbé értem a jelentését	Többé-kevésbé értem a jelentését	Értem a jelentését, és másoknak is el tudnám magyarázni	Értem a jelentését, és másoknak is el tudnám magyarázni	Többé-kevésbé értem a jelentését	Nem ismerem a jelentését, de szeretném megismerni	Többé-kevésbé értem a jelentését	Értem a jelentését, és másoknak is el tudnám magyarázni	Többé-kevésbé értem a jelentését	Nem ismerem a jelentését, de szeretném megismerni	Értem a jelentését, és másoknak is el tudnám magyarázni	Értem a jelentését, és másoknak is el tudnám magyarázni	Értem a jelentését, és másoknak is el tudnám magyarázni
279	https://online-kerdoiv.com/index/view/hash/f505d52a49dd686dada6511e6d93f5bb/r/enSc19VoXn6ImbfcWG4tRjYvoSAZ6JNhpRtH9N8PjiR82Wu5UXSSlaSSJbfUfOc9e5PPluSSu6BsJV1uWFPPluSSywR9DhCu9PPluSSjEjMLqPw5PprCWeY6bg19WgRuxIrAJEiPaZQSgdj9s5ysSSePPSSlaSSBtX9fQ3D1ME0IAFWsCaSLP3Z2WwYwPyK2CaIpFbsG0%3D	Nő	Semmelweis Egyetem		Alapképzési (Bsc)	Gyógytornász (Bsc)		Nappali	Második	Nem	Nem	Nem		Havonta vagy ritkábban	Igen	Igen	Igen		Google			Pubmed/Medline		Cochrane Library	Oktatási jegyzetek	Nem		Igen	az 1.-2. évfolyamon	Nem, az angol és magyar nyelvű forrásokat egyaránt elolvasom	Átlagosnál jobb (4)	Átlagosnál jobb (4)	Átlagos (3)	Valamennyire értek hozzá (2)	Valamennyire értek hozzá (2)	Átlagos (3)	Értem a jelentését, és másoknak is el tudnám magyarázni	Többé-kevésbé értem a jelentését	Értem a jelentését, és másoknak is el tudnám magyarázni	Értem a jelentését, és másoknak is el tudnám magyarázni	Értem a jelentését, és másoknak is el tudnám magyarázni	Többé-kevésbé értem a jelentését	Többé-kevésbé értem a jelentését	Nem ismerem a jelentését, de szerintem nem is hasznos számomra	Értem a jelentését, és másoknak is el tudnám magyarázni	Nem ismerem a jelentését, de szerintem nem is hasznos számomra	Értem a jelentését, és másoknak is el tudnám magyarázni	Nem ismerem a jelentését, de szeretném megismerni	Többé-kevésbé értem a jelentését
280	https://online-kerdoiv.com/index/view/hash/f505d52a49dd686dada6511e6d93f5bb/r/HIWc3SSlaSSbqAIjSSlaSSKxjr9LFUrxL6t4FdNDmA6HCydSeharXgtjvrPk8EjMbByacGWeh2oCVIPPluSSRmpRkuWVjNkcopLkPPluSSbQi86NcNW6WbRj9bUUbuLTUQpxbKnPPluSSFeyhs2L2Wo5OSSePPcEugMRe2NoxtU25NI3H3YefBKSvsijN3QoRKP6PnaJ0%3D	Nő	Semmelweis Egyetem		Alapképzési (Bsc)	Gyógytornász (Bsc)		Nappali	Első	Nem	Nem	Igen	Igen	Soha	Igen	Igen	Nem		Google		Wikipedia				Elektronikus folyóiratok	Nem		Igen	a 3.-4. évfolyamon	Igen, csak magyarul szeretek olvasni	Gyenge (1)	Gyenge (1)	Gyenge (1)	Gyenge (1)	Gyenge (1)	Valamennyire értek hozzá (2)	Értem a jelentését, és másoknak is el tudnám magyarázni	Többé-kevésbé értem a jelentését	Értem a jelentését, és másoknak is el tudnám magyarázni	Értem a jelentését, és másoknak is el tudnám magyarázni	Többé-kevésbé értem a jelentését	Nem ismerem a jelentését, de szeretném megismerni	Többé-kevésbé értem a jelentését	Nem ismerem a jelentését, de szeretném megismerni	Nincs véleményem ezzel kapcsolatosan	Nincs véleményem ezzel kapcsolatosan	Nem ismerem a jelentését, de szeretném megismerni	Értem a jelentését, és másoknak is el tudnám magyarázni	Többé-kevésbé értem a jelentését
281	https://online-kerdoiv.com/index/view/hash/f505d52a49dd686dada6511e6d93f5bb/r/8Sy2BI7wETTQPCOHPPluSSIuoP30slPWxZkq1fKh2UyKPPluSSDfeU5vKjdHJYHiBbZwP20SOO6Bt7UIBrDkHkPPluSSLn6xunCEvzD0FkZpYPPluSSYqfzBmIYZgbGRzm4NPHdT6KhsIe0PPluSSxXDUSSePPRfASSlaSS1n2hp9jZeTgehfQpEHtgoKYG90uIN2rcZO964AI%3D	Férfi	Semmelweis Egyetem		Mesterképzési (Msc)		Kiterjesztett hatásköri közösségi MSc	Nappali	Második	Igen	Nem	Nem		Hetente	Igen	Igen	Igen		Google		Wikipedia	Pubmed/Medline	Medscape		Elektronikus szakkönyvek	Igen	Nem	Nem		Igen, csak magyarul szeretek olvasni	Átlagos (3)	Átlagosnál jobb (4)	Átlagos (3)	Átlagos (3)	Átlagos (3)	Átlagosnál jobb (4)	Értem a jelentését, és másoknak is el tudnám magyarázni	Többé-kevésbé értem a jelentését	Értem a jelentését, és másoknak is el tudnám magyarázni	Értem a jelentését, és másoknak is el tudnám magyarázni	Értem a jelentését, és másoknak is el tudnám magyarázni	Többé-kevésbé értem a jelentését	Értem a jelentését, és másoknak is el tudnám magyarázni	Értem a jelentését, és másoknak is el tudnám magyarázni	Értem a jelentését, és másoknak is el tudnám magyarázni	Értem a jelentését, és másoknak is el tudnám magyarázni	Értem a jelentését, és másoknak is el tudnám magyarázni	Értem a jelentését, és másoknak is el tudnám magyarázni	Értem a jelentését, és másoknak is el tudnám magyarázni
282	https://online-kerdoiv.com/index/view/hash/f505d52a49dd686dada6511e6d93f5bb/r/MNLIPMH7RofC0Y4tBPufSSlaSSNEhvO2JJoZdPrzc2rCef5ZD8SSlaSSqykpSSlaSSYPPluSS6x7XFDEyy9m5gMk8daJpHax05tvuz3PPluSSPPluSSgnS38UFIreId7YyRc33QW2UZsYOasmp0N6YWaYqqkp7SSePPd9wufEGISSlaSSIdAL2EQ7s3jZfcqjyQ5DbPPluSS8NJVdFUPm7Vo%3D	Nő	Semmelweis Egyetem		Alapképzési (Bsc)	Népegészségügyi ellenőr (Bsc)		Nappali	Harmadik	Igen	Nem	Nem		Hetente	Igen	Igen	Igen		Google	Google Scholar		Pubmed/Medline	Medscape		Szakmai irányelvek	Igen	Igen	Igen	a 3.-4. évfolyamon	Nem, az angol és magyar nyelvű forrásokat egyaránt elolvasom	Átlagosnál jobb (4)	Átlagosnál jobb (4)	Valamennyire értek hozzá (2)	Átlagos (3)	Átlagos (3)	Átlagosnál jobb (4)	Értem a jelentését, és másoknak is el tudnám magyarázni	Értem a jelentését, és másoknak is el tudnám magyarázni	Értem a jelentését, és másoknak is el tudnám magyarázni	Értem a jelentését, és másoknak is el tudnám magyarázni	Értem a jelentését, és másoknak is el tudnám magyarázni	Többé-kevésbé értem a jelentését	Értem a jelentését, és másoknak is el tudnám magyarázni	Többé-kevésbé értem a jelentését	Nem ismerem a jelentését, de szeretném megismerni	Nem ismerem a jelentését, de szeretném megismerni	Értem a jelentését, és másoknak is el tudnám magyarázni	Értem a jelentését, és másoknak is el tudnám magyarázni	Többé-kevésbé értem a jelentését
283	https://online-kerdoiv.com/index/view/hash/f505d52a49dd686dada6511e6d93f5bb/r/chKr27d38h2am217MnrHTqwr68NBMjyzQxfVMOOB5x6qBV94B3zKPRjUZj9TdDg9MHpKgZXIJNIg1ZeXuOJHcWWGBeO2x5dX9uSSlaSSHNrSPI1iONfxFmSDem2X80eOU5eW0SSePPgt6LlrfOuTh4PPluSS0jQ20Z0OFT4mRw7yoYQSHmxqY1PQ7Y%3D	Nő	Semmelweis Egyetem		Alapképzési (Bsc)	Dietetikus (Bsc)		Nappali	Harmadik	Nem	Nem	Nem		Soha	Igen	Igen	Nem		Google		Wikipedia	Pubmed/Medline			Egészségügyi szakemberek véleményének megismerése	Igen	Igen	Igen	az 1.-2. évfolyamon	Nem, az angol és magyar nyelvű forrásokat egyaránt elolvasom	Gyenge (1)	Valamennyire értek hozzá (2)	Valamennyire értek hozzá (2)	Gyenge (1)	Valamennyire értek hozzá (2)	Valamennyire értek hozzá (2)	Értem a jelentését, és másoknak is el tudnám magyarázni	Nem ismerem a jelentését, de szeretném megismerni	Értem a jelentését, és másoknak is el tudnám magyarázni	Értem a jelentését, és másoknak is el tudnám magyarázni	Nem ismerem a jelentését, de szeretném megismerni	Nem ismerem a jelentését, de szeretném megismerni	Értem a jelentését, és másoknak is el tudnám magyarázni	Értem a jelentését, és másoknak is el tudnám magyarázni	Többé-kevésbé értem a jelentését	Értem a jelentését, és másoknak is el tudnám magyarázni	Értem a jelentését, és másoknak is el tudnám magyarázni	Értem a jelentését, és másoknak is el tudnám magyarázni	Többé-kevésbé értem a jelentését
284	https://online-kerdoiv.com/index/view/hash/f505d52a49dd686dada6511e6d93f5bb/r/I2p8TwIeNNkJA70FUimRNIvNcoRBqsXNuOVtOq9CgZyl3pwpDMI2PAanoKUgPPluSSAsM2J5iXpi6v6PPluSSYmHl2Th0zmQU4oOOKMOemHgINI9cfnJpxGcSykeuAN610JVvJ4CLeSSePP2p9iM0FqVtPPluSSEqe8eE4VHaSSlaSSpkSSlaSSt4R2w2vSNPvGNFiCn4%3D	Nő	Semmelweis Egyetem		Alapképzési (Bsc)	Gyógytornász (Bsc)		Nappali	Negyedik	Nem	Nem	Igen	Igen	Naponta	Igen	Igen	Nem		Google	Google Scholar	Wikipedia	Pubmed/Medline			Szakmai irányelvek	Nem		Igen	a 3.-4. évfolyamon	Nem, az angol és magyar nyelvű forrásokat egyaránt elolvasom	Átlagosnál jobb (4)	Átlagos (3)	Gyenge (1)	Gyenge (1)	Valamennyire értek hozzá (2)	Átlagos (3)	Értem a jelentését, és másoknak is el tudnám magyarázni	Többé-kevésbé értem a jelentését	Értem a jelentését, és másoknak is el tudnám magyarázni	Értem a jelentését, és másoknak is el tudnám magyarázni	Többé-kevésbé értem a jelentését	Nem ismerem a jelentését, de szeretném megismerni	Többé-kevésbé értem a jelentését	Nem ismerem a jelentését, de szeretném megismerni	Többé-kevésbé értem a jelentését	Értem a jelentését, és másoknak is el tudnám magyarázni	Többé-kevésbé értem a jelentését	Értem a jelentését, és másoknak is el tudnám magyarázni	Értem a jelentését, és másoknak is el tudnám magyarázni
285	https://online-kerdoiv.com/index/view/hash/f505d52a49dd686dada6511e6d93f5bb/r/QlrBwMAydPPluSSSSlaSSNtpjsnPnqoBPEweo29Bix6JeWAe9437jC5T1AuaHPOiSSlaSSsbb8GF5kyvTbPPluSSWckq0MAgnSSlaSShzcJsrdAh3jK7n7xq07UKaSSlaSSRkeGPPluSSGpPPluSSLyMPPluSSwWIHJYCDtA411x1SSePPwPia9274CPPluSSGq4XhvZYbyyjtAXFRAY9nsBLsseIavyj0%3D	Nő	Semmelweis Egyetem		Mesterképzési (Msc)	Fizioterápia (Msc)		Nappali	Első	Nem	Nem	Nem		Havonta vagy ritkábban	Igen	Igen	Igen		Google	Google Scholar		Pubmed/Medline			Elektronikus folyóiratok	Nem		Igen	az 1.-2. évfolyamon	Nem, az angol és magyar nyelvű forrásokat egyaránt elolvasom	Átlagos (3)	Gyenge (1)	Valamennyire értek hozzá (2)	Gyenge (1)	Átlagos (3)	Átlagosnál jobb (4)	Értem a jelentését, és másoknak is el tudnám magyarázni	Többé-kevésbé értem a jelentését	Értem a jelentését, és másoknak is el tudnám magyarázni	Értem a jelentését, és másoknak is el tudnám magyarázni	Nem ismerem a jelentését, de szeretném megismerni	Nem ismerem a jelentését, de szerintem nem is hasznos számomra	Értem a jelentését, és másoknak is el tudnám magyarázni	Értem a jelentését, és másoknak is el tudnám magyarázni	Értem a jelentését, és másoknak is el tudnám magyarázni	Értem a jelentését, és másoknak is el tudnám magyarázni	Értem a jelentését, és másoknak is el tudnám magyarázni	Értem a jelentését, és másoknak is el tudnám magyarázni	Értem a jelentését, és másoknak is el tudnám magyarázni
286	https://online-kerdoiv.com/index/view/hash/f505d52a49dd686dada6511e6d93f5bb/r/dTizkjIihj8rtp2VX3pmpfcFUGW5RJ56cq0iQL1tXwe221qgK3XcuyTEeERdu7bkCTIVA4QHNV7SSlaSSj54OXP2vlhPPluSSf9Z2gFkm84CVowJDdSc7pQa51ZmwjLA3XWRE9NtjMSSePPIBb7rEGNyH2MmljX5jR2zWYEqcJbDeFgdPPluSSAyVH4Dn34%3D	Nő	Semmelweis Egyetem		Alapképzési (Bsc)	Orvosi Diagnosztikai Laboratóriumi Analaitika (Bsc)		Levelezős	Harmadik	Igen	Nem	Nem		Hetente	Igen	Igen	Igen		Google		Wikipedia	Pubmed/Medline			Nyomtatott szakkönyvek	Igen	Igen	Igen	az 1.-2. évfolyamon	Nem, sőt, olvastam már olyan forrást is, ami egyéb (nem angol vagy magyar) nyelven íródott	Átlagosnál jobb (4)	Átlagosnál jobb (4)	Átlagos (3)	Átlagos (3)	Átlagosnál jobb (4)	Átlagosnál jobb (4)	Értem a jelentését, és másoknak is el tudnám magyarázni	Nem ismerem a jelentését, de szeretném megismerni	Értem a jelentését, és másoknak is el tudnám magyarázni	Értem a jelentését, és másoknak is el tudnám magyarázni	Értem a jelentését, és másoknak is el tudnám magyarázni	Többé-kevésbé értem a jelentését	Értem a jelentését, és másoknak is el tudnám magyarázni	Nem ismerem a jelentését, de szeretném megismerni	Nem ismerem a jelentését, de szeretném megismerni	Értem a jelentését, és másoknak is el tudnám magyarázni	Értem a jelentését, és másoknak is el tudnám magyarázni	Értem a jelentését, és másoknak is el tudnám magyarázni	Értem a jelentését, és másoknak is el tudnám magyarázni
287	https://online-kerdoiv.com/index/view/hash/f505d52a49dd686dada6511e6d93f5bb/r/Gg8roq3Df4bgEJDJstXFe5jQX4PcPPluSSLAOUA20pqZHFqDOlx0dkfAqdNVaTsvOYOIE3w9nwsRJcQ8NL33RKJ99qMXbIK7IXv9QhSjUOgZrIX874d6XqHrmJkkibVnE4xh6SSePPWNoAgiKiulKBBdVPPluSSINfWvxlmLthJLPI6bvCoJR6Xwuk%3D	Nő	Semmelweis Egyetem		Alapképzési (Bsc)	Orvosi Diagnosztikai Laboratóriumi Analaitika (Bsc)		Levelezős	Negyedik	Igen	Nem	Igen	Nem	Naponta	Igen	Igen	Igen		Google	Google Scholar	Wikipedia	Pubmed/Medline	Medscape		Elektronikus szakkönyvek	Igen	Igen	Igen	a 3.-4. évfolyamon	Nem, sőt, olvastam már olyan forrást is, ami egyéb (nem angol vagy magyar) nyelven íródott	Átlagosnál jobb (4)	Átlagosnál jobb (4)	Átlagos (3)	Átlagos (3)	Átlagos (3)	Átlagosnál jobb (4)	Értem a jelentését, és másoknak is el tudnám magyarázni	Értem a jelentését, és másoknak is el tudnám magyarázni	Értem a jelentését, és másoknak is el tudnám magyarázni	Értem a jelentését, és másoknak is el tudnám magyarázni	Értem a jelentését, és másoknak is el tudnám magyarázni	Értem a jelentését, és másoknak is el tudnám magyarázni	Értem a jelentését, és másoknak is el tudnám magyarázni	Értem a jelentését, és másoknak is el tudnám magyarázni	Értem a jelentését, és másoknak is el tudnám magyarázni	Értem a jelentését, és másoknak is el tudnám magyarázni	Értem a jelentését, és másoknak is el tudnám magyarázni	Értem a jelentését, és másoknak is el tudnám magyarázni	Értem a jelentését, és másoknak is el tudnám magyarázni
288	https://online-kerdoiv.com/index/view/hash/f505d52a49dd686dada6511e6d93f5bb/r/OwwXwpMRRsiwztLtqTMVEtcUvpyVUFzEA41l1CjHuPPluSSSlXRS925bPPluSSNtvYPzOnbrKaid5RPdTCZd60csiNAHyfU9cyScsr2PrUprg3fSSlaSSBsEMSO9c72jmmVi2YI0SSlaSSkmZ49PPluSSSSePPjSGYg14dCNx9IKVITLnSSlaSSDIk47wnS8mWuF2LS4MuWFD0%3D	Nő	Semmelweis Egyetem		Alapképzési (Bsc)	Szülésznő (Bsc)		Nappali	Harmadik	Nem	Nem	Nem		Havonta vagy ritkábban	Igen	Igen	Nem				Wikipedia	Pubmed/Medline			Oktatási jegyzetek	Nem		Igen	az 1.-2. évfolyamon	Nem, az angol és magyar nyelvű forrásokat egyaránt elolvasom	Átlagos (3)	Valamennyire értek hozzá (2)	Gyenge (1)	Gyenge (1)	Valamennyire értek hozzá (2)	Átlagosnál jobb (4)	Többé-kevésbé értem a jelentését	Nem ismerem a jelentését, de szeretném megismerni	Többé-kevésbé értem a jelentését	Többé-kevésbé értem a jelentését	Nem ismerem a jelentését, de szeretném megismerni	Nem ismerem a jelentését, de szeretném megismerni	Többé-kevésbé értem a jelentését	Értem a jelentését, és másoknak is el tudnám magyarázni	Többé-kevésbé értem a jelentését	Többé-kevésbé értem a jelentését	Értem a jelentését, és másoknak is el tudnám magyarázni	Értem a jelentését, és másoknak is el tudnám magyarázni	Értem a jelentését, és másoknak is el tudnám magyarázni
289	https://online-kerdoiv.com/index/view/hash/f505d52a49dd686dada6511e6d93f5bb/r/WLNTJamVwmXjxzbPiETNoGSSI075jnrgLWD6MlUQXa1rmskG5CHPPluSSYSSlaSSqAG43lsjsHppNPnJeHHHQT4SrTB1rV167TjSv5LWXpyRNBkyfSSlaSShjuCV8yGoEtJQ7vX5GaYT7U9SSePPjjZ0FgWIyc4Y623uSSlaSSjfSSlaSSlqkzLZ8SRCiYIPPluSSzSSlaSSXc2a9ik%3D	Nő	Semmelweis Egyetem		Alapképzési (Bsc)	Gyógytornász (Bsc)		Nappali	Második	Nem	Igen	Nem		Hetente	Igen	Igen	Igen		Google			Pubmed/Medline			Nyomtatott szakkönyvek	Nem		Igen	a 3.-4. évfolyamon	Nem, az angol és magyar nyelvű forrásokat egyaránt elolvasom	Átlagosnál jobb (4)	Átlagosnál jobb (4)	Átlagosnál jobb (4)	Valamennyire értek hozzá (2)	Átlagosnál jobb (4)	Átlagos (3)	Értem a jelentését, és másoknak is el tudnám magyarázni	Többé-kevésbé értem a jelentését	Értem a jelentését, és másoknak is el tudnám magyarázni	Többé-kevésbé értem a jelentését	Nem ismerem a jelentését, de szeretném megismerni	Nem ismerem a jelentését, de szeretném megismerni	Többé-kevésbé értem a jelentését	Értem a jelentését, és másoknak is el tudnám magyarázni	Nem ismerem a jelentését, de szeretném megismerni	Nem ismerem a jelentését, de szeretném megismerni	Értem a jelentését, és másoknak is el tudnám magyarázni	Értem a jelentését, és másoknak is el tudnám magyarázni	Értem a jelentését, és másoknak is el tudnám magyarázni
290	https://online-kerdoiv.com/index/view/hash/f505d52a49dd686dada6511e6d93f5bb/r/qzhYmog1yZAUNziPsjGfnqo8PSSlaSSrZAAqHWzHj1Nq7hINWbu7db8u7c0KkXswLA3UplA7s8TecHbmMZrX6EBAhPdoOZerPPluSSEBGSSlaSSN8E96JznWUtofYCywe3SSlaSSd5JzgJBIjPPluSSfISSePPHBMic8PPluSSD5dg6dGbNZuAezGcbqoIgdzBfxxf0xuL8vi8%3D	Nő	Semmelweis Egyetem		Alapképzési (Bsc)	Gyógytornász (Bsc)		Nappali	Negyedik	Nem	Nem	Nem		Havonta vagy ritkábban	Igen	Igen	Igen		Google	Google Scholar		Pubmed/Medline			Nyomtatott szakkönyvek	Igen	Igen	Igen	a 3.-4. évfolyamon	Nem, az angol és magyar nyelvű forrásokat egyaránt elolvasom	Átlagos (3)	Átlagos (3)	Valamennyire értek hozzá (2)	Valamennyire értek hozzá (2)	Valamennyire értek hozzá (2)	Valamennyire értek hozzá (2)	Többé-kevésbé értem a jelentését	Többé-kevésbé értem a jelentését	Többé-kevésbé értem a jelentését	Többé-kevésbé értem a jelentését	Nem ismerem a jelentését, de szeretném megismerni	Nem ismerem a jelentését, de szeretném megismerni	Nem ismerem a jelentését, de szeretném megismerni	Nem ismerem a jelentését, de szeretném megismerni	Nem ismerem a jelentését, de szeretném megismerni	Nem ismerem a jelentését, de szeretném megismerni	Nem ismerem a jelentését, de szeretném megismerni	Többé-kevésbé értem a jelentését	Többé-kevésbé értem a jelentését
291	https://online-kerdoiv.com/index/view/hash/f505d52a49dd686dada6511e6d93f5bb/r/PSgj0Gj07rlthzZNhBInMp7V0Bobt7UqWDLE7zVmv5N6SLukCtZE3GMeI7OcjDadVg3S8kzPPluSSwy0htMWPPluSSBXwloPPluSS90CKN9qTnx1rxxeUkP7ruzxUhsYOZ5ld7O2wGwP7BRSSePPGXqJAFrnyHUtm5m5A6MbixIUCaUYhO8WibySSlaSSEuU9C8w%3D	Nő	Semmelweis Egyetem		Alapképzési (Bsc)	Egészségturizmus szervező (Bsc)		Levelezős	Harmadik	Igen	Nem	Nem		Hetente	Igen	Igen	Nem		Google				Medscape		Szakmai irányelvek	Igen	Igen	Igen	a 3.-4. évfolyamon	Nem, az angol és magyar nyelvű forrásokat egyaránt elolvasom	Átlagosnál jobb (4)	Átlagos (3)	Átlagos (3)	Átlagos (3)	Átlagos (3)	Átlagosnál jobb (4)	Értem a jelentését, és másoknak is el tudnám magyarázni	Értem a jelentését, és másoknak is el tudnám magyarázni	Értem a jelentését, és másoknak is el tudnám magyarázni	Értem a jelentését, és másoknak is el tudnám magyarázni	Nem ismerem a jelentését, de szeretném megismerni	Nem ismerem a jelentését, de szeretném megismerni	Értem a jelentését, és másoknak is el tudnám magyarázni	Értem a jelentését, és másoknak is el tudnám magyarázni	Értem a jelentését, és másoknak is el tudnám magyarázni	Értem a jelentését, és másoknak is el tudnám magyarázni	Értem a jelentését, és másoknak is el tudnám magyarázni	Értem a jelentését, és másoknak is el tudnám magyarázni	Értem a jelentését, és másoknak is el tudnám magyarázni
292	https://online-kerdoiv.com/index/view/hash/f505d52a49dd686dada6511e6d93f5bb/r/ccjVlMAsHqSSlaSSIUONn8XdCVASSlaSS2r0fzdnWXJe14NKTeLlT78lRGjidSo6lzESSlaSSSSlaSS7reSSlaSS1t4OmTXAVW2jiXyip3C0HCIrEX8FaHTSSlaSSPFloRbWSSlaSSgn0jfmGPPluSS2o7oJU311CcGa6FtTSSePPpqqw2Kci6aAnxy2Q9MfACdlgsJjQpHAn8otRlqBfNaE%3D	Nő	Semmelweis Egyetem		Mesterképzési (Msc)	Fizioterápia (Msc)		Levelezős	Első	Igen	Nem	Igen	Nem	Hetente	Nem	Igen	Nem			Google Scholar		Pubmed/Medline			Oktatási jegyzetek	Igen	Igen	Igen	az 1.-2. évfolyamon	Igen, csak magyarul szeretek olvasni	Valamennyire értek hozzá (2)	Átlagos (3)	Átlagos (3)	Átlagos (3)	Átlagosnál jobb (4)	Átlagosnál jobb (4)	Értem a jelentését, és másoknak is el tudnám magyarázni	Nem ismerem a jelentését, de szeretném megismerni	Többé-kevésbé értem a jelentését	Értem a jelentését, és másoknak is el tudnám magyarázni	Nem ismerem a jelentését, de szeretném megismerni	Nem ismerem a jelentését, de szeretném megismerni	Értem a jelentését, és másoknak is el tudnám magyarázni	Értem a jelentését, és másoknak is el tudnám magyarázni	Értem a jelentését, és másoknak is el tudnám magyarázni	Nem ismerem a jelentését, de szeretném megismerni	Értem a jelentését, és másoknak is el tudnám magyarázni	Értem a jelentését, és másoknak is el tudnám magyarázni	Értem a jelentését, és másoknak is el tudnám magyarázni
293	https://online-kerdoiv.com/index/view/hash/f505d52a49dd686dada6511e6d93f5bb/r/NmcfdfA5m9KGZEgRo5uojaWHdJ149wmJjioqNKlSSlaSSXPiX2DYnPYOSSlaSS4C4LstpoSSlaSS0Bv8kPCN7MwGxY5dXrBjMUHWp0De2kxKnMhlZfCVjPPluSSiqdEpR7GkQFnPcsBoLpwRV4JnSSePPwZGMUezOxqyJGgSSlaSSfiXaSSlaSSXukfqqkRgx2xit4otlPzGG0%3D	Nő	Semmelweis Egyetem		Alapképzési (Bsc)	Népegészségügyi ellenőr (Bsc)		Nappali	Első	Nem	Nem	Nem		Hetente	Igen	Igen	Igen		Google						Nyomtatott szakkönyvek	Nem		Igen	az 1.-2. évfolyamon	Igen, csak magyarul szeretek olvasni	Átlagosnál jobb (4)	Haladó szintű (5)	Átlagos (3)	Valamennyire értek hozzá (2)	Átlagos (3)	Átlagosnál jobb (4)	Többé-kevésbé értem a jelentését	Többé-kevésbé értem a jelentését	Nem ismerem a jelentését, de szeretném megismerni	Nem ismerem a jelentését, de szeretném megismerni	Többé-kevésbé értem a jelentését	Többé-kevésbé értem a jelentését	Többé-kevésbé értem a jelentését	Többé-kevésbé értem a jelentését	Többé-kevésbé értem a jelentését	Többé-kevésbé értem a jelentését	Többé-kevésbé értem a jelentését	Többé-kevésbé értem a jelentését	Többé-kevésbé értem a jelentését
294	https://online-kerdoiv.com/index/view/hash/f505d52a49dd686dada6511e6d93f5bb/r/DU3dV3irR5CkydDj1N9LuSKcYV50ARIIlECKLgRwgC67R1sN8BvxSl1LSSlaSSPPluSS2dtAWuSSlaSS3GR8EhrDCa97nXafIjgBGyWqCsCzwbrMXUWQDJ0klcIEdjTpiN9pJwV32pre0rpSSePPmBdPPluSSyao5PPluSS4AmKGXz7rSa5EiOcBBZRrTYJb5ZZBbwSeY%3D	Nő	Semmelweis Egyetem		Alapképzési (Bsc)	Gyógytornász (Bsc)		Nappali	Első	Nem	Nem	Nem		Havonta vagy ritkábban	Igen	Igen	Nem		Google		Wikipedia				Nyomtatott szakkönyvek	Nem		Igen	az 1.-2. évfolyamon	Nem, az angol és magyar nyelvű forrásokat egyaránt elolvasom	Átlagosnál jobb (4)	Átlagosnál jobb (4)	Valamennyire értek hozzá (2)	Valamennyire értek hozzá (2)	Átlagosnál jobb (4)	Átlagos (3)	Értem a jelentését, és másoknak is el tudnám magyarázni	Többé-kevésbé értem a jelentését	Nem ismerem a jelentését, de szeretném megismerni	Többé-kevésbé értem a jelentését	Értem a jelentését, és másoknak is el tudnám magyarázni	Többé-kevésbé értem a jelentését	Többé-kevésbé értem a jelentését	Nem ismerem a jelentését, de szeretném megismerni	Nem ismerem a jelentését, de szerintem nem is hasznos számomra	Nem ismerem a jelentését, de szerintem nem is hasznos számomra	Értem a jelentését, és másoknak is el tudnám magyarázni	Értem a jelentését, és másoknak is el tudnám magyarázni	Értem a jelentését, és másoknak is el tudnám magyarázni
295	https://online-kerdoiv.com/index/view/hash/f505d52a49dd686dada6511e6d93f5bb/r/JN9SQOZmNM5VWwVlxVmDq0XlRs9A47Mcpt2JqxA3P8WbCs0IazdnvL7ESLIWrfOvpzS0Nj5ghBNV8TZVeuInGwZrkhuEgIPulNzPr1pfKm0Ic0Xic4QQiPJ4k2curGGrSSePPg9aGxFpW0XSJ16csRBiMK2Hl6539pWes5MvEgmOR0kg%3D	Nő	Semmelweis Egyetem		Mesterképzési (Msc)	Ápolás (Msc)		Nappali	Első	Igen	Nem	Nem		Hetente	Igen	Igen	Igen		Google		Wikipedia	Pubmed/Medline	Medscape		Szakmai irányelvek	Nem		Igen	a 3.-4. évfolyamon	Igen, csak magyarul szeretek olvasni	Átlagos (3)	Átlagos (3)	Valamennyire értek hozzá (2)	Gyenge (1)	Valamennyire értek hozzá (2)	Átlagos (3)	Többé-kevésbé értem a jelentését	Nem ismerem a jelentését, de szeretném megismerni	Nem ismerem a jelentését, de szeretném megismerni	Többé-kevésbé értem a jelentését	Nem ismerem a jelentését, de szeretném megismerni	Nem ismerem a jelentését, de szerintem nem is hasznos számomra	Nem ismerem a jelentését, de szeretném megismerni	Nem ismerem a jelentését, de szeretném megismerni	Többé-kevésbé értem a jelentését	Nem ismerem a jelentését, de szeretném megismerni	Többé-kevésbé értem a jelentését	Többé-kevésbé értem a jelentését	Többé-kevésbé értem a jelentését
296	https://online-kerdoiv.com/index/view/hash/f505d52a49dd686dada6511e6d93f5bb/r/h8mbhprLrnxPPluSS7SgMMyEDqiZ5XKi5VyTAijuyvPYSSlaSSuPPluSSCppnSI6ZTas94zm96Wx7kml44kbCD1SnkV1odsrdA2D0SSlaSSKTPSkT8Wr14S1NjgBSfCdSSlaSSJ7fSP7Q5rOakxrqiiXCSSePPhLXSSlaSSBQafwgYkjWuZU3ObkKdRaleOrA7tr4EFQz6Vtmc%3D	Nő	Semmelweis Egyetem		Alapképzési (Bsc)	Dietetikus (Bsc)		Nappali	Harmadik	Nem	Nem	Nem		Havonta vagy ritkábban	Igen	Igen	Nem		Google			Pubmed/Medline	Medscape		Elektronikus szakkönyvek	Nem		Igen	a 3.-4. évfolyamon	Nem, az angol és magyar nyelvű forrásokat egyaránt elolvasom	Átlagos (3)	Valamennyire értek hozzá (2)	Valamennyire értek hozzá (2)	Gyenge (1)	Gyenge (1)	Átlagos (3)	Többé-kevésbé értem a jelentését	Nem ismerem a jelentését, de szeretném megismerni	Értem a jelentését, és másoknak is el tudnám magyarázni	Értem a jelentését, és másoknak is el tudnám magyarázni	Többé-kevésbé értem a jelentését	Nem ismerem a jelentését, de szeretném megismerni	Értem a jelentését, és másoknak is el tudnám magyarázni	Többé-kevésbé értem a jelentését	Többé-kevésbé értem a jelentését	Többé-kevésbé értem a jelentését	Értem a jelentését, és másoknak is el tudnám magyarázni	Értem a jelentését, és másoknak is el tudnám magyarázni	Többé-kevésbé értem a jelentését
297	https://online-kerdoiv.com/index/view/hash/f505d52a49dd686dada6511e6d93f5bb/r/RAEUxcPXSSlaSS9sSSlaSSSSlaSSP8ht1aCt03ACbjXUoecZVYo3y2tgtn3iWdY2rZmPPluSSquyIYqax2cnsQz6CycIG4dWBCSSlaSSzJd3OQCtEtPPluSSKGklRMpSSlaSSEeSSlaSSHYdyyrJWviQBhEsD8OZhbGvnzBJSSePPhCJFbTOrAeoqBQeHLgJDqdfgJNirVd0KJMpq72jIHf0%3D	Nő	Semmelweis Egyetem		Alapképzési (Bsc)	Ápoló (Bsc)		Levelezős	Második	Igen	Nem	Nem		Hetente	Igen	Igen	Igen		Google		Wikipedia	Pubmed/Medline			Egészségügyi szakemberek véleményének megismerése	Igen	Igen	Igen	a 3.-4. évfolyamon	Nem, sőt, olvastam már olyan forrást is, ami egyéb (nem angol vagy magyar) nyelven íródott	Átlagos (3)	Átlagosnál jobb (4)	Gyenge (1)	Gyenge (1)	Valamennyire értek hozzá (2)	Átlagosnál jobb (4)	Értem a jelentését, és másoknak is el tudnám magyarázni	Értem a jelentését, és másoknak is el tudnám magyarázni	Értem a jelentését, és másoknak is el tudnám magyarázni	Értem a jelentését, és másoknak is el tudnám magyarázni	Többé-kevésbé értem a jelentését	Többé-kevésbé értem a jelentését	Értem a jelentését, és másoknak is el tudnám magyarázni	Többé-kevésbé értem a jelentését	Nem ismerem a jelentését, de szeretném megismerni	Nem ismerem a jelentését, de szeretném megismerni	Értem a jelentését, és másoknak is el tudnám magyarázni	Értem a jelentését, és másoknak is el tudnám magyarázni	Többé-kevésbé értem a jelentését
298	https://online-kerdoiv.com/index/view/hash/f505d52a49dd686dada6511e6d93f5bb/r/N5F5OO0qJjOXbSgl71HaKnRuJvdVV914WeGyNSiK51v2EpRto3aKaDjdEIY506s5BKAIvjISSlaSSa2vgxLaUkT8gMxuKCVMYMSSlaSSORySyyplAuPPluSSk7vAKSSlaSSZBFPCs1f0IeEKaL8tSSePPFsrKiYGbDFNUpBjzi8dlcWEGKPPluSS9vdjl7CfJgUQr3Kq4%3D	Nő	Semmelweis Egyetem		Mesterképzési (Msc)	Táplálkozástudományi (Msc)		Levelezős	Első	Igen	Nem	Nem		Soha	Igen	Igen	Nem		Google		Wikipedia				Szakmai irányelvek	Igen	Igen	Igen	a 3.-4. évfolyamon	Igen, csak magyarul szeretek olvasni	Átlagosnál jobb (4)	Haladó szintű (5)	Átlagos (3)	Átlagos (3)	Átlagos (3)	Átlagosnál jobb (4)	Értem a jelentését, és másoknak is el tudnám magyarázni	Többé-kevésbé értem a jelentését	Értem a jelentését, és másoknak is el tudnám magyarázni	Értem a jelentését, és másoknak is el tudnám magyarázni	Többé-kevésbé értem a jelentését	Többé-kevésbé értem a jelentését	Értem a jelentését, és másoknak is el tudnám magyarázni	Értem a jelentését, és másoknak is el tudnám magyarázni	Nem ismerem a jelentését, de szeretném megismerni	Értem a jelentését, és másoknak is el tudnám magyarázni	Értem a jelentését, és másoknak is el tudnám magyarázni	Értem a jelentését, és másoknak is el tudnám magyarázni	Többé-kevésbé értem a jelentését
299	https://online-kerdoiv.com/index/view/hash/f505d52a49dd686dada6511e6d93f5bb/r/p00PPluSSvBvaKnsIqohzgDdORKPX2DrmbCTcSSlaSSwjyZcvBxxUlgqt3mAmiIvymxmhYqUKCPPluSSKJfPPluSSdbsvClY4nF1xLD6PPluSStoXSar5rkjM9Woas4mpiSNSvBuZ2G6GUctiIGJlBHm0SSePPYv4qWCERFbPPluSSyy4jITZA6GhmUmCcgPPluSSNCav9VhmMJT45I%3D	Nő	Semmelweis Egyetem		Alapképzési (Bsc)	Dietetikus (Bsc)		Nappali	Harmadik	Nem	Nem	Nem		Havonta vagy ritkábban	Igen	Igen	Nem		Google			Pubmed/Medline			Egészségügyi szakemberek véleményének megismerése	Nem		Igen	az 1.-2. évfolyamon	Igen, csak magyarul szeretek olvasni	Átlagos (3)	Valamennyire értek hozzá (2)	Valamennyire értek hozzá (2)	Gyenge (1)	Átlagos (3)	Átlagos (3)	Többé-kevésbé értem a jelentését	Nem ismerem a jelentését, de szeretném megismerni	Értem a jelentését, és másoknak is el tudnám magyarázni	Értem a jelentését, és másoknak is el tudnám magyarázni	Többé-kevésbé értem a jelentését	Nem ismerem a jelentését, de szeretném megismerni	Többé-kevésbé értem a jelentését	Értem a jelentését, és másoknak is el tudnám magyarázni	Többé-kevésbé értem a jelentését	Nem ismerem a jelentését, de szeretném megismerni	Értem a jelentését, és másoknak is el tudnám magyarázni	Értem a jelentését, és másoknak is el tudnám magyarázni	Többé-kevésbé értem a jelentését
300	https://online-kerdoiv.com/index/view/hash/f505d52a49dd686dada6511e6d93f5bb/r/8cXcoBnujNSSlaSSerunECVMrSSlaSSG8IZSSlaSSygFPPluSSfxDKIwmjItWycbztuU7jX7DiDyHGi3PPluSSWQWJYEPfHp5SSlaSSnPx6krTJH4GMvi8guvgkPfTM334ZTzinpQuk1v3Ul1wlNIPPluSS826WVpJ2SSePPUxEBra8BO0gM7JZfk52bF5Izpxfq3TjQnFrWpZDVEOw%3D	Nő	Semmelweis Egyetem		Alapképzési (Bsc)	Népegészségügyi ellenőr (Bsc)		Nappali	Első	Nem	Nem	Nem		Hetente	Igen	Igen	Nem		Google		Wikipedia				Oktatási jegyzetek	Nem		Igen	az 1.-2. évfolyamon	Igen, csak magyarul szeretek olvasni	Átlagosnál jobb (4)	Átlagos (3)	Átlagos (3)	Átlagos (3)	Átlagos (3)	Haladó szintű (5)	Értem a jelentését, és másoknak is el tudnám magyarázni	Értem a jelentését, és másoknak is el tudnám magyarázni	Értem a jelentését, és másoknak is el tudnám magyarázni	Értem a jelentését, és másoknak is el tudnám magyarázni	Értem a jelentését, és másoknak is el tudnám magyarázni	Értem a jelentését, és másoknak is el tudnám magyarázni	Értem a jelentését, és másoknak is el tudnám magyarázni	Értem a jelentését, és másoknak is el tudnám magyarázni	Értem a jelentését, és másoknak is el tudnám magyarázni	Értem a jelentését, és másoknak is el tudnám magyarázni	Értem a jelentését, és másoknak is el tudnám magyarázni	Értem a jelentését, és másoknak is el tudnám magyarázni	Értem a jelentését, és másoknak is el tudnám magyarázni
301	https://online-kerdoiv.com/index/view/hash/f505d52a49dd686dada6511e6d93f5bb/r/JEnLtnbTWPE141lOdJEn5H8PPluSSfd3nSSlaSScE4ZNYCGfvqgCPPluSSYJKQp7UfdSyzabXFAhyJR2xvvi5N9agQqUlrEaO90e2ituuNuo7CzLG9R2CXJrWMOYSSlaSSyWTxcG3hxOPTOfQp7QSSePPOwMBsT4yeLUDfJPdey3jShTQwLYZPPluSS3858ss60INTHcU%3D	Nő	Semmelweis Egyetem		Alapképzési (Bsc)	Ápoló (Bsc)		Levelezős	Harmadik	Igen	Nem	Igen	Nem	Havonta vagy ritkábban	Igen	Igen	Nem		Google		Wikipedia	Pubmed/Medline			Oktatási jegyzetek	Igen	Igen	Igen	az 1.-2. évfolyamon	Igen, csak magyarul szeretek olvasni	Átlagos (3)	Átlagos (3)	Átlagos (3)	Átlagos (3)	Átlagos (3)	Átlagosnál jobb (4)	Értem a jelentését, és másoknak is el tudnám magyarázni	Többé-kevésbé értem a jelentését	Értem a jelentését, és másoknak is el tudnám magyarázni	Értem a jelentését, és másoknak is el tudnám magyarázni	Értem a jelentését, és másoknak is el tudnám magyarázni	Értem a jelentését, és másoknak is el tudnám magyarázni	Értem a jelentését, és másoknak is el tudnám magyarázni	Többé-kevésbé értem a jelentését	Nem ismerem a jelentését, de szeretném megismerni	Nem ismerem a jelentését, de szeretném megismerni	Értem a jelentését, és másoknak is el tudnám magyarázni	Értem a jelentését, és másoknak is el tudnám magyarázni	Értem a jelentését, és másoknak is el tudnám magyarázni
302	https://online-kerdoiv.com/index/view/hash/f505d52a49dd686dada6511e6d93f5bb/r/caTalsybzx7GVcls0UsAF6iOzdwEIVN394PPluSSidEBSC9TD1c4O14PPluSSnUKD4G1AmXSdjSSlaSS5JbAMUuMbEdPPluSSPPluSSqAKLcSSlaSSiwqVD13kw2sycKTNx4kOVom2n4FVcdFxiiNFtvLds2V6SSePPGufzLpCQz4XTK3MPPluSSVc5SSlaSS0u3nSSlaSSspvOOpSSlaSSU6tyWb7KPPluSSo8%3D	Nő	Semmelweis Egyetem		Alapképzési (Bsc)	Gyógytornász (Bsc)		Nappali	Második	Nem	Nem	Igen	Igen	Soha	Igen	Igen	Igen		Google						Nyomtatott folyóiratok	Nem		Igen	a 3.-4. évfolyamon	Nem, az angol és magyar nyelvű forrásokat egyaránt elolvasom	Gyenge (1)	Átlagos (3)	Gyenge (1)	Gyenge (1)	Gyenge (1)	Valamennyire értek hozzá (2)	Többé-kevésbé értem a jelentését	Nem ismerem a jelentését, de szeretném megismerni	Értem a jelentését, és másoknak is el tudnám magyarázni	Értem a jelentését, és másoknak is el tudnám magyarázni	Nem ismerem a jelentését, de szeretném megismerni	Nem ismerem a jelentését, de szeretném megismerni	Nem ismerem a jelentését, de szeretném megismerni	Többé-kevésbé értem a jelentését	Nem ismerem a jelentését, de szeretném megismerni	Nem ismerem a jelentését, de szeretném megismerni	Többé-kevésbé értem a jelentését	Értem a jelentését, és másoknak is el tudnám magyarázni	Többé-kevésbé értem a jelentését
303	https://online-kerdoiv.com/index/view/hash/f505d52a49dd686dada6511e6d93f5bb/r/HV6gN3933ad42pjRNFiQphUjn9kSopy0hCKq9svqKOAsrNMfGrAUmAWqVy7uDSSlaSS67enqgh0i8I9eSp2ydSSlaSS8hJyvOGYPua8He1XqNOdzNV8eLSRaG0r13IsGXZWgP6dKoFSSePP1jPPluSS9rlKeg0HXmuwDWVodPZW2nwSkPPluSSbNhsDaXnECvFJM%3D	Nő	Semmelweis Egyetem		Alapképzési (Bsc)	Népegészségügyi ellenőr (Bsc)		Levelezős	Harmadik	Nem	Nem	Igen	Nem	Hetente	Igen	Igen	Nem		Google		Wikipedia	Pubmed/Medline	Medscape		Elektronikus szakkönyvek	Igen	Igen	Igen	az 1.-2. évfolyamon	Igen, csak magyarul szeretek olvasni	Átlagos (3)	Átlagosnál jobb (4)	Átlagos (3)	Valamennyire értek hozzá (2)	Valamennyire értek hozzá (2)	Átlagos (3)	Értem a jelentését, és másoknak is el tudnám magyarázni	Értem a jelentését, és másoknak is el tudnám magyarázni	Értem a jelentését, és másoknak is el tudnám magyarázni	Értem a jelentését, és másoknak is el tudnám magyarázni	Értem a jelentését, és másoknak is el tudnám magyarázni	Értem a jelentését, és másoknak is el tudnám magyarázni	Értem a jelentését, és másoknak is el tudnám magyarázni	Értem a jelentését, és másoknak is el tudnám magyarázni	Értem a jelentését, és másoknak is el tudnám magyarázni	Többé-kevésbé értem a jelentését	Értem a jelentését, és másoknak is el tudnám magyarázni	Értem a jelentését, és másoknak is el tudnám magyarázni	Értem a jelentését, és másoknak is el tudnám magyarázni
304	https://online-kerdoiv.com/index/view/hash/f505d52a49dd686dada6511e6d93f5bb/r/eIz97VPOsx1YQVcolJP6HSWd4TrEwhj1U71DvBg1SSlaSSY4pwXPPluSSBuBpicchnSyh2p4pSSlaSSPPluSSEO6NtL3JIsKSSlaSSciLWFeslVLCMDK1b6WIQ1sDpqsV1tDqwLsgbnuMJmFMIhpwCjoLSSePPiuhCWSPqvm20VidOOciUpVTweKuSSlaSSwtrPPluSSBMtPOXpxq1o%3D	Nő	Semmelweis Egyetem		Alapképzési (Bsc)	Mentőtiszt (Bsc)		Levelezős	Első	Nem	Nem	Igen	Igen	Havonta vagy ritkábban	Igen	Igen	Igen		Google		Wikipedia				Egészségügyi szakemberek véleményének megismerése	Nem		Nem		Igen, csak magyarul szeretek olvasni	Átlagos (3)	Átlagosnál jobb (4)	Valamennyire értek hozzá (2)	Átlagos (3)	Átlagos (3)	Átlagos (3)	Értem a jelentését, és másoknak is el tudnám magyarázni	Nem ismerem a jelentését, de szeretném megismerni	Többé-kevésbé értem a jelentését	Többé-kevésbé értem a jelentését	Nem ismerem a jelentését, de szeretném megismerni	Nem ismerem a jelentését, de szeretném megismerni	Nem ismerem a jelentését, de szeretném megismerni	Nem ismerem a jelentését, de szeretném megismerni	Nem ismerem a jelentését, de szeretném megismerni	Nem ismerem a jelentését, de szeretném megismerni	Többé-kevésbé értem a jelentését	Nem ismerem a jelentését, de szerintem nem is hasznos számomra	Nem ismerem a jelentését, de szerintem nem is hasznos számomra
305	https://online-kerdoiv.com/index/view/hash/f505d52a49dd686dada6511e6d93f5bb/r/X4686k5brtkqzT60ouSSlaSShPPluSSRBJPYGvu3PE0YxVIK22KqPPluSSDO2E8zuFDoaPSSlaSS19uXZtLj0TuEdqFnRrzVf1V4540699TnBYMAYzugTZf9H2NbBKTKPn9yYzFwKNrE5XDIDPHaSSePPNklk7H6VC7BfUBHNcPPluSS2KjoiShSSlaSSKQN5ku9DoUMZzd4Oc%3D	Nő	Semmelweis Egyetem		Alapképzési (Bsc)	Dietetikus (Bsc)		Nappali	Harmadik	Nem	Nem	Nem		Hetente	Igen	Igen	Igen		Google	Google Scholar	Wikipedia	Pubmed/Medline			Szakmai irányelvek	Nem		Igen	a 3.-4. évfolyamon	Nem, sőt, olvastam már olyan forrást is, ami egyéb (nem angol vagy magyar) nyelven íródott	Átlagosnál jobb (4)	Átlagos (3)	Átlagos (3)	Átlagosnál jobb (4)	Átlagos (3)	Átlagos (3)	Értem a jelentését, és másoknak is el tudnám magyarázni	Többé-kevésbé értem a jelentését	Értem a jelentését, és másoknak is el tudnám magyarázni	Értem a jelentését, és másoknak is el tudnám magyarázni	Értem a jelentését, és másoknak is el tudnám magyarázni	Többé-kevésbé értem a jelentését	Értem a jelentését, és másoknak is el tudnám magyarázni	Értem a jelentését, és másoknak is el tudnám magyarázni	Többé-kevésbé értem a jelentését	Nem ismerem a jelentését, de szeretném megismerni	Értem a jelentését, és másoknak is el tudnám magyarázni	Értem a jelentését, és másoknak is el tudnám magyarázni	Értem a jelentését, és másoknak is el tudnám magyarázni
306	https://online-kerdoiv.com/index/view/hash/f505d52a49dd686dada6511e6d93f5bb/r/wm5j2SSlaSSEa4bTrIaAaASSlaSS4YEQqt6ZDVXSHzO89RDLrd8bvoYAIKvgta5VWX2UHBhbGn7aNSSlaSSywAV0LgrpDUBKevOienQB6vd12A85zbQFCoAeozzgC2k9KkB5tUltDhxyfqGSSePPELp3F2rlX02PPluSSpyPPluSSE9hUhaRlj846SSlaSSS6nH3nVSMpuyAmY%3D	Nő	Semmelweis Egyetem		Mesterképzési (Msc)	Fizioterápia (Msc)		Levelezős	Második	Nem	Igen	Igen	Igen	Hetente	Igen	Igen	Igen		Google	Google Scholar		Pubmed/Medline		Cochrane Library	Elektronikus folyóiratok	Igen	Igen	Igen	a 3.-4. évfolyamon	Nem, az angol és magyar nyelvű forrásokat egyaránt elolvasom	Átlagosnál jobb (4)	Átlagosnál jobb (4)	Átlagos (3)	Valamennyire értek hozzá (2)	Átlagos (3)	Átlagosnál jobb (4)	Értem a jelentését, és másoknak is el tudnám magyarázni	Nem ismerem a jelentését, de szeretném megismerni	Értem a jelentését, és másoknak is el tudnám magyarázni	Értem a jelentését, és másoknak is el tudnám magyarázni	Többé-kevésbé értem a jelentését	Nem ismerem a jelentését, de szeretném megismerni	Többé-kevésbé értem a jelentését	Értem a jelentését, és másoknak is el tudnám magyarázni	Többé-kevésbé értem a jelentését	Többé-kevésbé értem a jelentését	Értem a jelentését, és másoknak is el tudnám magyarázni	Értem a jelentését, és másoknak is el tudnám magyarázni	Többé-kevésbé értem a jelentését
307	https://online-kerdoiv.com/index/view/hash/f505d52a49dd686dada6511e6d93f5bb/r/HW5p3HrERtE83W0bDlvIKQLIJSfYtnYUuXjuzUDjUiVWtStULqlYbgV7obzaanMDK3TY3yTw9MmRtsYTBiO6szkxNpPFJ3DAw9qRLcFSSlaSShEMssTGwWBgrSSlaSSG1SSlaSSG5rcvUPzSSePPtK3KNkfjSIxwVSSlaSSs0JrPPluSSKwiUuSSlaSSw4mgDqYTB4PfY8qloQ%3D	Nő	Semmelweis Egyetem		Alapképzési (Bsc)	Szülésznő (Bsc)		Levelezős	Második	Nem	Nem	Nem		Havonta vagy ritkábban	Igen	Igen	Nem		Google		Wikipedia	Pubmed/Medline			Elektonikus média	Nem		Igen	az 1.-2. évfolyamon	Nem, az angol és magyar nyelvű forrásokat egyaránt elolvasom	Átlagosnál jobb (4)	Haladó szintű (5)	Gyenge (1)	Gyenge (1)	Átlagos (3)	Valamennyire értek hozzá (2)	Értem a jelentését, és másoknak is el tudnám magyarázni	Nem ismerem a jelentését, de szeretném megismerni	Értem a jelentését, és másoknak is el tudnám magyarázni	Értem a jelentését, és másoknak is el tudnám magyarázni	Többé-kevésbé értem a jelentését	Nem ismerem a jelentését, de szeretném megismerni	Többé-kevésbé értem a jelentését	Nem ismerem a jelentését, de szeretném megismerni	Értem a jelentését, és másoknak is el tudnám magyarázni	Többé-kevésbé értem a jelentését	Többé-kevésbé értem a jelentését	Értem a jelentését, és másoknak is el tudnám magyarázni	Többé-kevésbé értem a jelentését
308	https://online-kerdoiv.com/index/view/hash/f505d52a49dd686dada6511e6d93f5bb/r/616jzLzcl8J9e3ulMgI6t2QMcjTxFO9hWnNr8WlDCS3sKzPeIefqeFCMfT69K0rOJ53lQs3SSlaSS2wbcaZWmkJ0tFoNVSSlaSSMPRH3lSSlaSSp9wMIfaPPluSSJoB1g7IpESSlaSSdcnO0h7v2ouVB5SSePPDnmj4plkcSNankQ9nhJIv5kNShPPluSS6pHEVMRhIDuJSPx8%3D	Nő	Semmelweis Egyetem		Alapképzési (Bsc)	Dietetikus (Bsc)		Nappali	Negyedik	Nem	Nem	Nem		Havonta vagy ritkábban	Igen	Igen	Nem		Google	Google Scholar		Pubmed/Medline			Szakmai irányelvek	Nem		Igen	a 3.-4. évfolyamon	Nem, az angol és magyar nyelvű forrásokat egyaránt elolvasom	Valamennyire értek hozzá (2)	Gyenge (1)	Valamennyire értek hozzá (2)	Valamennyire értek hozzá (2)	Valamennyire értek hozzá (2)	Valamennyire értek hozzá (2)	Többé-kevésbé értem a jelentését	Nem ismerem a jelentését, de szeretném megismerni	Értem a jelentését, és másoknak is el tudnám magyarázni	Értem a jelentését, és másoknak is el tudnám magyarázni	Többé-kevésbé értem a jelentését	Nem ismerem a jelentését, de szeretném megismerni	Többé-kevésbé értem a jelentését	Értem a jelentését, és másoknak is el tudnám magyarázni	Értem a jelentését, és másoknak is el tudnám magyarázni	Nem ismerem a jelentését, de szeretném megismerni	Értem a jelentését, és másoknak is el tudnám magyarázni	Értem a jelentését, és másoknak is el tudnám magyarázni	Értem a jelentését, és másoknak is el tudnám magyarázni
309	https://online-kerdoiv.com/index/view/hash/f505d52a49dd686dada6511e6d93f5bb/r/ZZ0SxcSSlaSSI7ZXr2DXkIW40zUAcZYm6xSvg3vRHP6yNzyXfDObDGqVP9U3cZRw1tDmhoubo4koibzPSSlaSSycOfCZDLrPX7wjGqO6L3T6z2wUf86Z1ApHATfIQtBff4JLAPkY7PPluSSSSePPPPluSSvmlmb208yAm4QEOUO8tsJarny7olR5UazcRpa06qAQ%3D	Nő	Semmelweis Egyetem		Alapképzési (Bsc)	Ápoló (Bsc)		Nappali	Harmadik	Igen	Nem	Nem		Naponta	Igen	Igen	Nem		Google	Google Scholar		Pubmed/Medline	Medscape		Szakmai irányelvek	Igen	Igen	Igen	a 3.-4. évfolyamon	Nem, sőt, olvastam már olyan forrást is, ami egyéb (nem angol vagy magyar) nyelven íródott	Átlagosnál jobb (4)	Átlagosnál jobb (4)	Átlagos (3)	Átlagos (3)	Átlagos (3)	Átlagosnál jobb (4)	Értem a jelentését, és másoknak is el tudnám magyarázni	Többé-kevésbé értem a jelentését	Értem a jelentését, és másoknak is el tudnám magyarázni	Értem a jelentését, és másoknak is el tudnám magyarázni	Többé-kevésbé értem a jelentését	Többé-kevésbé értem a jelentését	Értem a jelentését, és másoknak is el tudnám magyarázni	Többé-kevésbé értem a jelentését	Többé-kevésbé értem a jelentését	Többé-kevésbé értem a jelentését	Értem a jelentését, és másoknak is el tudnám magyarázni	Értem a jelentését, és másoknak is el tudnám magyarázni	Értem a jelentését, és másoknak is el tudnám magyarázni
310	https://online-kerdoiv.com/index/view/hash/f505d52a49dd686dada6511e6d93f5bb/r/pkVGM1gFrUoNAoO1bH3M3gfOwMmSHpBkF0hBHXPPluSS806bs8backq1Gewhm1oPBicv86O7hvIkX9E5AxljRdM7XZviqkyngoDbWbs0vB40bP0Eu9jE0U8PPluSSiHTF763SAgxbaSSePPcTMQ2rSSlaSScF5am8xhlEe6FzdyWJufDAPPluSSTNUII3OH9O9CI%3D	Nő	Semmelweis Egyetem		Alapképzési (Bsc)	Orvosi Diagnosztikai Laboratóriumi Analaitika (Bsc)		Levelezős	Negyedik	Nem	Nem	Igen	Igen	Havonta vagy ritkábban	Igen	Igen	Igen		Google	Google Scholar		Pubmed/Medline	Medscape		Elektronikus folyóiratok	Nem		Nem		Nem, az angol és magyar nyelvű forrásokat egyaránt elolvasom	Átlagos (3)	Átlagos (3)	Átlagos (3)	Átlagos (3)	Átlagos (3)	Átlagos (3)	Többé-kevésbé értem a jelentését	Nem ismerem a jelentését, de szerintem nem is hasznos számomra	Többé-kevésbé értem a jelentését	Többé-kevésbé értem a jelentését	Nem ismerem a jelentését, de szerintem nem is hasznos számomra	Többé-kevésbé értem a jelentését	Többé-kevésbé értem a jelentését	Nem ismerem a jelentését, de szerintem nem is hasznos számomra	Többé-kevésbé értem a jelentését	Nem ismerem a jelentését, de szeretném megismerni	Nem ismerem a jelentését, de szeretném megismerni	Többé-kevésbé értem a jelentését	Többé-kevésbé értem a jelentését
311	https://online-kerdoiv.com/index/view/hash/f505d52a49dd686dada6511e6d93f5bb/r/4XifRUNahzIitriY9PPluSSPPluSS5CxiaKfrdF53kGPBMPfh9qCcplOS380lhWxEapQ6PPluSSOiep1j4sppyYBUaMIwtZsz2Kt6PPluSSu75fU9cSowbw6vOttWAuxzceOXygv21dtKjGQqxFgSSePPwmAcmlSSlaSSvl3dgcALwSMgJ0RJhNJN54C8bnc2KQTBCtd4%3D	Nő	Gál Ferenc Főiskola		Mesterképzési (Msc)	Egészségügyi szociális munka (Msc)		Levelezős	Első	Nem	Nem	Nem		Hetente	Igen	Igen	Nem		Google						Oktatási jegyzetek	Nem		Igen	az 1.-2. évfolyamon	Igen, csak magyarul szeretek olvasni	Átlagos (3)	Átlagosnál jobb (4)	Átlagos (3)	Átlagos (3)	Átlagos (3)	Átlagos (3)	Többé-kevésbé értem a jelentését	Nem ismerem a jelentését, de szeretném megismerni	Nem ismerem a jelentését, de szeretném megismerni	Nem ismerem a jelentését, de szeretném megismerni	Többé-kevésbé értem a jelentését	Nem ismerem a jelentését, de szeretném megismerni	Nem ismerem a jelentését, de szeretném megismerni	Értem a jelentését, és másoknak is el tudnám magyarázni	Többé-kevésbé értem a jelentését	Nem ismerem a jelentését, de szeretném megismerni	Többé-kevésbé értem a jelentését	Többé-kevésbé értem a jelentését	Többé-kevésbé értem a jelentését
[truncated: 600 more rows]
[truncated: 13 more columns]
